# Supplementary material for: VertU: universal multilocus primer sets for eDNA metabarcoding of vertebrate diversity, evaluated by both artificial and natural cases
Source: Frontiers journal article supplement (doi:10.3389/fevo.2023.1164206), 2023-06-19
Supplement: Image_1.PDF [file Image_1.PDF]

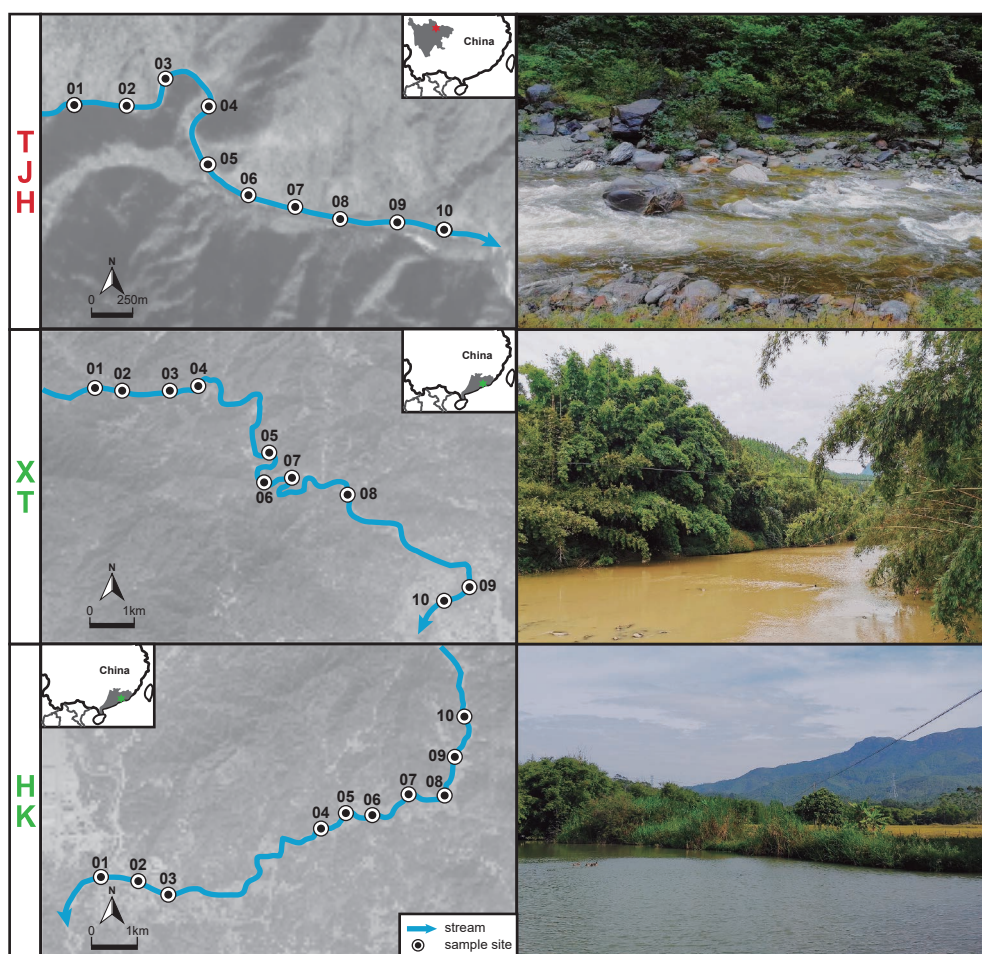

Figure S1. The study areas of this study: Tangjiahe National Nature Reserve (TJH), Xintian town (XT), and Hekou town (HK). Environmental DNA sampling maps (left side) show the rivers (blue lines) and locations of the eDNA sampling sites (black dots). The natural environment of each river is shown on the right.
