# Supplementary material for: VertU: universal multilocus primer sets for eDNA metabarcoding of vertebrate diversity, evaluated by both artificial and natural cases
Source: Frontiers journal article supplement (doi:10.3389/fevo.2023.1164206), 2023-06-19
Supplement: Table_1.XLSX [file Table_1.XLSX]

## Sheet: Table S1
Table S1. The summary information of the 792 mitochondrial genomes of vertebrates used for primer design.
Higher classification	Order(154)	Family(792)	Species(792)	accession no.
Cyclostomata	Myxiniformes	Myxinidae	Eptatretus burgeri	NC_002807.1
	Petromyzontiformes	Geotriidae	Geotria australis	NC_029404.1
	Petromyzontiformes	Petromyzontidae	Lampetra fluviatilis	Y18683.1
Chondrichthyes	Carcharhiniformes	Sphyrnidae	Eusphyra blochii	KJ128290.1
	Carcharhiniformes	Proscylliidae	Proscyllium habereri	NC_030216.1
	Carcharhiniformes	Hemigaleidae	Hemipristis elongata	NC_032065.1
	Carcharhiniformes	Carcharhinidae	Carcharhinus amblyrhynchos	MT663280.1
	Carcharhiniformes	Triakidae	Mustelus mustelus	NC_039629.1
	Carcharhiniformes	Scyliorhinidae	Galeus melastomus	NC_049881.1
	Chimaeriformes	Callorhinchidae	Callorhinchus milii	HM147137.1
	Chimaeriformes	Chimaeridae	Hydrolagus affinis	NC_047231.1
	Heterodontiformes	Heterodontidae	Heterodontus zebra	NC_021615.1
	Hexanchiformes	Chlamydoselachidae	Chlamydoselachus anguineus	KU159431.1
	Hexanchiformes	Hexanchidae	Hexanchus griseus	KF894491.1
	Lamniformes	Megachasmidae	Megachasma pelagios	NC_021442.1
	Lamniformes	Mitsukurinidae	Mitsukurina owstoni	EU528659.1
	Lamniformes	Odontaspididae	Odontaspis ferox	MT702386.1
	Lamniformes	Alopiidae	Alopias vulpinus	NC_049866.1
	Lamniformes	Pseudocarchariidae	Pseudocarcharias kamoharai	NC_026216.1
	Myliobatiformes	Plesiobatidae	Plesiobatis daviesi	AY597334.1
	Myliobatiformes	Potamotrygonidae	Potamotrygon magdalenae	NC_036041.1
	Myliobatiformes	Dasyatidae	Bathytoshia brevicaudata	MT780270.1
	Orectolobiformes	Rhincodontidae	Rhincodon typus	MF872726.1
	Orectolobiformes	Stegostomatidae	Stegostoma fasciatum	NC_029480.1
	Orectolobiformes	Hemiscylliidae	Hemiscyllium ocellatum	NC_044745.1
	Orectolobiformes	Ginglymostomatidae	Ginglymostoma cirratum	NC_030189.1
	Orectolobiformes	Orectolobidae	Orectolobus japonicus	NC_022148.1
	Pristiformes	Rhinobatidae	Glaucostegus granulatus	MN783017.1
	Pristiformes	Pristidae	Pristis pristis	NC_039438.1
	Pristiformes	Rhynchobatidae	Rhynchobatus laevis	NC_047241.1
	Pristiformes	Rhinidae	Rhina ancylostoma	NC_030215.1
	Pristiophoriformes	Pristiophoridae	Pristiophorus japonicus	NC_024110.1
	Rajiformes	Rajidae	Raja brachyura	MT850125.1
	Rajiformes	Anacanthobatidae	Sinobatis borneensis	NC_030328.1
	Squaliformes	Dalatiidae	Squaliolus aliae	NC_031508.1
	Squaliformes	Etmopteridae	Etmopterus spinax	MN122934.1
	Squaliformes	Somniosidae	Somniosus microcephalus	NC_049864.1
	Squaliformes	Squalidae	Squalus brevirostris	NC_034748.1
	Squatiniformes	Squatinidae	Squatina dumeril	NC_048468.1
	Torpediniformes	Narcinidae	Narcine bancroftii	NC_034772.1
Actinopterygii	Acanthuriformes	Luvaridae	Luvarus imperialis	NC_009851.1
	Acanthuriformes	Acanthuridae	Acanthurus lineatus	NC_010108.2
	Acanthuriformes	Zanclidae	Zanclus cornutus	NC_009852.1
	Acipenseriformes	Polyodontidae	Polyodon spathula	KU985086.2
	Acipenseriformes	Acipenseridae	Pseudoscaphirhynchus kaufmanni	NC_050885.1
	Albuliformes	Albulidae	Pterothrissus gissu	NC_005796.1
	Alepocephaliformes	Leptochilichthyidae	Leptochilichthys agassizii	NC_011006.1
	Alepocephaliformes	Platytroctidae	Platytroctes apus	NC_004597.1
	Alepocephaliformes	Alepocephalidae	Leptoderma macrophthalmum	NC_015100.1
	Amiiformes	Amiidae	Amia calva	NC_004742.1
	Anabantiformes	Channidae	Channa striata	MN205549.1
	Anabantiformes	Osphronemidae	Betta mahachaiensis	MT682637.1
	Anabantiformes	Anabantidae	Anabas testudineus	KX950694.1
	Anabantiformes	Pristolepididae	Pristolepis rubripinnis	NC_044771.1
	Anabantiformes	Badidae	Dario dario	MT344964.1
	Anguilliformes	Heterenchelyidae	Pythonichthys microphthalmus	NC_013601.1
	Anguilliformes	Muraenidae	Gymnothorax minor	MK204283.1
	Anguilliformes	Myrocongridae	Myroconger compressus	NC_013631.1
	Anguilliformes	Ophichthidae	Xyrias revulsus	KY021065.1
	Anguilliformes	Muraenesocidae	Cynoponticus ferox	NC_013617.1
	Anguilliformes	Congridae	Ariosoma meeki	KX641476.1
	Anguilliformes	Nettastomatidae	Leptocephalus sp. 'type II larva	NC_013615.1
	Anguilliformes	Derichthyidae	Derichthys serpentinus	NC_013611.1
	Anguilliformes	Colocongridae	Coloconger cadenati	NC_013606.1
	Anguilliformes	Cyematidae	Cyema atrum	NC_013609.1
	Anguilliformes	Anguillidae	Anguilla anguilla	MT410930.1
	Anguilliformes	Serrivomeridae	Serrivomer sector	NC_013436.1
	Anguilliformes	Saccopharyngidae	Saccopharynx lavenbergi	NC_005298.1
	Anguilliformes	Eurypharyngidae	Eurypharynx pelecanoides	NC_005299.1
	Anguilliformes	Nemichthyidae	Labichthys carinatus	NC_013626.2
Actinopterygii	Anguilliformes	Moringuidae	Moringua microchir	NC_013602.1
	Anguilliformes	Chlopsidae	Kaupichthys hyoproroides	NC_013607.1
	Anguilliformes	Synaphobranchidae	Dysomma anguillare	MK574146.1
	Ateleopodiformes	Ateleopodidae	Ijimaia dofleini	NC_003179.1
	Atheriniformes	Atherinopsidae	Leuresthes tenuis	MN181432.1
	Atheriniformes	Isonidae	Iso hawaiiensis	NC_011178.1
	Atheriniformes	Atherinidae	Craterocephalus stramineus	NC_043854.1
	Atheriniformes	Bedotiidae	Bedotia geayi	NC_034336.1
	Atheriniformes	Melanotaeniidae	Melanotaenia praecox	NC_030253.1
	Aulopiformes	Chlorophthalmidae	Chlorophthalmus nigromarginatus	NC_027654.1
	Aulopiformes	Synodontidae	Harpadon nehereus	NC_047466.1
	Aulopiformes	Aulopidae	Hime japonica	NC_002674.1
	Batrachoidaria	Batrachoididae	Porichthys myriaster	NC_006920.1
	Beloniformes	Adrianichthyidae	Oryzias celebensis	NC_049128.1
	Beloniformes	Zenarchopteridae	Zenarchopterus buffonis	MK600518.1
	Beloniformes	Belonidae	Strongylura anastomella	NC_026998.1
	Beloniformes	Exocoetidae	Cheilopogon spilonotopterus	NC_039400.1
	Beloniformes	Hemiramphidae	Hyporhamphus quoyi	MH714706.1
	Beryciformes	Rondeletiidae	Rondeletia loricata	NC_003186.1
	Beryciformes	Barbourisiidae	Barbourisia rufa	NC_012046.1
	Beryciformes	Cetomimidae	Eutaeniophorus sp. 033-Miya	NC_004390.1
	Beryciformes	Berycidae	Beryx splendens	DQ996312.1
	Beryciformes	Melamphaidae	Poromitra oscitans	NC_003172.1
	Blenniiformes	Gobiesocidae	Aspasma minima	NC_008130.1
	Blenniiformes	Blenniidae	Salarias fasciatus	NC_004412.1
	Caproiformes	Caproidae	Capros aper	NC_010958.1
	Carangiformes	Carangidae	Trachurus trachurus	MT410871.1
	Carangiformes	Coryphaenidae	Coryphaena equiselis	MH576916.1
	Carangiformes	Echeneidae	Echeneis naucrates	NC_022508.1
	Centrarchiformes	Terapontidae	Leiopotherapon unicolor	NC_043855.1
	Centrarchiformes	Kyphosidae	Girella melanichthys	NC_046940.1
	Centrarchiformes	Kuhliidae	Kuhlia mugil	NC_013142.1
	Centrarchiformes	Oplegnathidae	Oplegnathus fasciatus	DQ872160.1
	Centrarchiformes	Percalatidae	Percalates novemaculeata	NC_024850.1
	Centrarchiformes	Cirrhitidae	Paracirrhites arcatus	NC_022512.1
	Centrarchiformes	Cheilodactylidae	Cheilodactylus quadricornis	NC_028180.1
	Centrarchiformes	Enoplosidae	Enoplosus armatus	NC_013181.1
	Centrarchiformes	Sinipercidae	Siniperca fortis	NC_047290.1
	Centrarchiformes	Elassomatidae	Elassoma zonatum	NC_011388.1
	Centrarchiformes	Centrarchidae	Lepomis macrochirus	MK840862.1
	Centrarchiformes	Percichthyidae	Maccullochella peelii	MN842722.1
	Chaetodontiformes	Leiognathidae	Photopectoralis bindus	MG677547.1
	Chaetodontiformes	Chaetodontidae	Chaetodon wiebeli	NC_048979.1
	Characiformes	Characoidei	Hyphessobrycon megalopterus	MT185596.1
	Characiformes	Distichodontidae	Distichodus sexfasciatus	NC_015836.1
	Characiformes	Citharinidae	Ichthyborus sp. NM-2010	NC_015752.1
	Characiformes	Crenuchidae	Crenuchus spilurus	AP011986.1
	Characiformes	Acestrorhynchidae	Acestrorhynchus sp. NM-2010	NC_015755.1
	Characiformes	Gasteropelecidae	Carnegiella strigata	AP011983.1
	Characiformes	Hemiodontidae	Hemiodopsis gracilis	NC_015816.1
	Characiformes	Chalceidae	Chalceus macrolepidotus	NC_004700.1
	Characiformes	Lebiasinidae	Lebiasina astrigata	MH921292.1
	Characiformes	Ctenoluciidae	Ctenolucius hujeta	AP011987.1
	Characiformes	Erythrinidae	Hoplias intermedius	NC_033860.1
	Characiformes	Characidae	Hyphessobrycon megalopterus	MT185596.1
	Characiformes	Hepsetidae	Hepsetus odoe	MH668154.1
	Characiformes	Anostomidae	Megaleporinus obtusidens	NC_034945.1
	Characiformes	Alestidae	Micralestes sp. NM-2010	NC_015753.1
	Characiformes	Curimatidae	Curimata mivartii	NC_025951.1
	Cichliformes	Cichlidae	Heros severus	MT363636.1
	Clupeiformes	Clupeoidei	Ilisha striatula	MK391600.1
	Clupeiformes	Pristigasteridae	Ilisha striatula	MK391600.1
	Clupeiformes	Chirocentridae	Chirocentrus dorab	AP006229.1
	Clupeiformes	Clupeidae	Konosirus punctatus	MT801134.1
	Clupeiformes	Engraulidae	Engraulis encrasicolus	MT410920.1
	Clupeiformes	Denticipitidae	Denticeps clupeoides	NC_007889.1
	Cypriniformes	Tanichthyidae	Tanichthys albonubes	NC_015539.1
	Cypriniformes	Cyprinidae	Cyprinus carpio	MK088487.1
	Cypriniformes	Leptobarbidae	Leptobarbus hoevenii	NC_015528.1
	Cypriniformes	Gastromyzontidae	Erromyzon sinensis	NC_049573.1
Actinopterygii	Cypriniformes	Botiidae	Yasuhikotakia eos	MT800510.1
	Cypriniformes	Acheilognathidae	Acheilognathus chankaensis	MN683735.1
	Cypriniformes	Xenocyprididae	Megalobrama terminalis	MN725725.1
	Cypriniformes	Leuciscidae	Blicca bjoerkna	MT410960.1
	Cypriniformes	Tincidae	Tinca tinca	NC_008648.1
	Cypriniformes	Gobionidae	Squalidus chankaensis	NC_050647.1
	Cypriniformes	Serpenticobitidae	Serpenticobitis octozona	NC_033956.1
	Cypriniformes	Paedocyprididae	Paedocypris carbunculus	MT909825.1
	Cypriniformes	Danionidae	Barilius malabaricus	NC_046023.1
	Cypriniformes	Barbuccidae	Barbucca diabolica	NC_033954.1
	Cypriniformes	Psilorhynchidae	Psilorhynchus homaloptera	DQ026436.1
	Cypriniformes	Vaillantellidae	Vaillantella maassi	NC_008680.1
	Cypriniformes	Gyrinocheilidae	Gyrinocheilus aymonieri	KY307844.1
	Cypriniformes	Nemacheilidae	Triplophysa yarkandensis	MN821008.1
	Cypriniformes	Ellopostomatidae	Ellopostoma mystax	NC_031642.1
	Cypriniformes	Cobitidae	Cobitis hankugensis	MN841275.1
	Cypriniformes	Balitoridae	Balitora ludongensis	NC_050979.1
	Cypriniformes	Catostomidae	Catostomus commersonii	MH324427.1
	Cypriniformes	Cyprinidae	Neolissochilus benasi	MN598560.1
	Cyprinodontiformes	Rivulidae	Kryptolebias hermaphroditus	NC_032387.1
	Cyprinodontiformes	Nothobranchiidae	Nothobranchius nubaensis	NC_044427.1
	Cyprinodontiformes	Aplocheilidae	Aplocheilus lineatus	NC_044433.1
	Cyprinodontiformes	Goodeidae	Crenichthys baileyi moapae	KY014104.1
	Cyprinodontiformes	Cyprinodontidae	Cyprinodon diabolis	KX061747.1
	Cyprinodontiformes	Poeciliidae	Poecilia formosa	MK263672.1
	Cyprinodontiformes	Fundulidae	Fundulus heteroclitus	FJ445403.1
	Elopiformes	Megalopidae	Megalops cyprinoides	NC_005799.1
	Elopiformes	Elopidae	Elops hawaiensis	NC_005798.1
	Ephippiformes	Drepaneidae	Drepane longimana	KP164983.1
	Ephippiformes	Ephippidae	Ephippus orbis	NC_027733.1
	Esociformes	Esocidae	Esox reichertii	NC_023269.1
	Esociformes	Umbridae	Umbra limi	NC_028282.1
	Gadiformes	Bregmacerotidae	Bregmaceros nectabanus	NC_008124.1
	Gadiformes	Macrouridae	Macrourus whitsoni	MT157320.1
	Gadiformes	Muraenolepididae	Muraenolepis orangiensis	MT192937.1
	Gadiformes	Lotidae	Lota lota	KC844053.1
	Gadiformes	Gadidae	Gadus morhua	MN122852.1
	Gadiformes	Moridae	Physiculus japonicus	NC_004377.1
	Galaxiidae	Galaxiidae	Lovettia sealii	NC_043851.1
	Gobiiformes	Trichonotidae	Trichonotus setiger	NC_034345.1
	Gobiiformes	Odontobutidae	Neodontobutis hainanensis	NC_049890.1
	Gobiiformes	Eleotridae	Hypseleotris klunzingeri	NC_043852.1
	Gobiiformes	Rhyacichthyidae	Rhyacichthys aspro	NC_004414.1
	Gobiiformes	Kraemeriidae	Kraemeria cunicularia	NC_035716.1
	Gobiiformes	Gobiidae	Favonigobius reichei	MN617828.1
	Gonorynchiformes	Gonorynchidae	Gonorynchus greyi	NC_004702.1
	Gonorynchiformes	Chanidae	Chanos chanos	NC_004693.1
	Gonorynchiformes	Kneriidae	Parakneria cameronensis	NC_007891.1
	Gymnotiformes	Gymnotidae	Gymnotus carapo	AP011979.1
	Gymnotiformes	Apteronotidae	Apteronotus rostratus	MH399592.2
	Gymnotiformes	Hypopomidae	Brachyhypopomus occidentalis	MH399591.1
	Gymnotiformes	Rhamphichthyidae	Gymnorhamphichthys sp. NM-2010	NC_015754.1
	Gymnotiformes	Sternopygidae	Sternopygus dariensis	MK530706.1
	Hiodontiformes	Hiodontidae	Hiodon tergisus	NC_015082.1
	Holocentriformes	Holocentridae	Sargocentron spiniferum	NC_030597.1
	Istiophoriformes	Istiompax	Istiompax indica	KJ510417.1
	Istiophoriformes	Istiophorus	Istiophorus platypterus	KU315124.1
	Istiophoriformes	Makaira	Makaira nigricans	NC_030006.1
	Istiophoriformes	Tetrapturus	Tetrapturus georgii	NC_030009.1
	Istiophoriformes	Kajikia	Kajikia albida	NC_030010.1
	Istiophoriformes	Xiphiidae	Xiphias gladius	NC_012677.1
	Kurtiformes	Kurtidae	Kurtus gulliveri	NC_022477.1
	Kurtiformes	Apogonidae	Ostorhinchus novemfasciatus	MW007385.1
	Labriformes	Odacidae	Olisthops cyanomelas	NC_009061.1
	Labriformes	Labridae	Centrolabrus exoletus	MT410926.1
	Lampriformes	Regalecidae	Regalecus glesne	MK209627.1
	Lampriformes	Trachipteridae	Trachipterus trachypterus	NC_003166.1
	Lampriformes	Lampridae	Lampris guttatus	NC_003165.1
	Lobotiformes	Hapalogenyidae	Hapalogenys analis	MT561534.1
	Lobotiformes	Datnioididae	Datnioides microlepis	NC_030278.1
Actinopterygii	Lophiiformes	Lophiidae	Lophius piscatorius	MN240767.1
	Lophiiformes	Chaunacidae	Chaunax pictus	NC_013883.1
	Lophiiformes	Caulophrynidae	Caulophryne pelagica	NC_016020.1
	Lophiiformes	Thaumatichthyidae	Thaumatichthys pagidostomus	NC_013875.1
	Lophiiformes	Linophrynidae	Haplophryne mollis	NC_013865.1
	Lophiiformes	Neoceratiidae	Neoceratias spinifer	NC_013864.1
	Lophiiformes	Diceratiidae	Bufoceratias thele	NC_013869.1
	Lophiiformes	Himantolophidae	Himantolophus groenlandicus	NC_013868.1
	Lophiiformes	Melanocetidae	Melanocetus murrayi	NC_004384.1
	Lophiiformes	Oneirodidae	Oneirodes thompsoni	NC_013871.1
	Lophiiformes	Ceratiidae	Ceratias uranoscopus	NC_013882.1
	Lophiiformes	Gigantactinidae	Gigantactis vanhoeffeni	NC_013885.1
	Lophiiformes	Ogcocephalidae	Coelophrys brevicaudata	NC_013886.1
	Lutjaniformes	Lutjanidae	Lutjanus carponotatus	NC_044104.1
	Lutjaniformes	Haemulidae	Plectorhinchus vittatus	NC_027098.1
	Myctophiformes	Myctophidae	Benthosema pterotum	NC_047480.1
	Myctophiformes	Neoscopelidae	Neoscopelus microchir	NC_003180.1
	Notacanthiformes	Notacanthidae	Notacanthus bonaparte	NC_047186.1
	Notacanthiformes	Halosauridae	Halosauropsis macrochir	NC_035885.1
	Ophidiiformes	Ophidiidae	Sirembo imberbis	MN937450.1
	Ophidiiformes	Carapidae	Carapus bermudensis	NC_004373.1
	Ophidiiformes	Bythitidae	Diplacanthopoma brachysoma	NC_004376.1
	Osmeriformes	Salanx	Salanx cuvieri	NC_029156.1
	Osmeriformes	Protosalanx	Protosalanx chinensis	NC_042393.1
	Osmeriformes	Neosalanx	Neosalanx taihuensis	MH348204.1
	Osmeriformes	Salangichthys	Salangichthys microdon	NC_004599.1
	Osmeriformes	Hemisalanx	Hemisalanx brachyrostralis	NC_029157.1
	Osmeriformes	Plecoglossus	Plecoglossus altivelis	EU124683.1
	Osmeriformes	Mallotus	Mallotus villosus	HM106491.1
	Osmeriformes	Retropinnidae	Retropinna semoni	NC_031372.1
	Osmeriformes	Osmeridae	Osmerus eperlanus	MT410880.1
	Osteoglossiformes	Pantodontidae	Pantodon buchholzi	NC_003096.1
	Osteoglossiformes	Mormyridae	Cyphomyrus discorhynchus	NC_015105.1
	Osteoglossiformes	Gymnarchidae	Gymnarchus niloticus	NC_012707.1
	Osteoglossiformes	Notopteridae	Chitala chitala	KX894524.1
	Osteoglossiformes	Osteoglossidae	Scleropages formosus	KY131791.1
	Pempheriformes	Lateolabracidae	Lateolabrax maculatus	NC_018045.1
	Pempheriformes	Acropomatidae	Synagrops japonicus	NC_034335.1
	Pempheriformes	Epigonidae	Epigonus denticulatus	NC_034334.1
	Pempheriformes	Percophidae	Acanthaphritis unoorum	NC_034344.1
	Pempheriformes	Banjosidae	Banjos banjos	NC_028165.1
	Pempheriformes	Pentacerotidae	Pseudopentaceros richardsoni	NC_020016.1
	Pempheriformes	Bathyclupeidae	Bathyclupea megaceps	NC_034342.1
	Pempheriformes	Champsodontidae	Champsodon cf. snyderi CBM-ZF 10876	NC_022483.1
	Perciformes	Notothenioidei	Notothenia rossii	MN893242.1
	Perciformes	Synanceiidae	Inimicus japonicus	NC_050964.1
	Perciformes	Scorpaenidae	Scorpaenopsis cirrosa	NC_027735.1
	Perciformes	Sebastidae	Sebastes viviparus	MT410865.1
	Perciformes	Peristediidae	Scalicus amiscus	NC_004403.1
	Perciformes	Triglidae	Lepidotrigla hime	MN737591.1
	Perciformes	Hexagrammidae	Hexagrammos agrammus	MT363637.1
	Perciformes	Agonidae	Hemitripterus villosus	NC_046471.1
	Perciformes	Cottidae	Myoxocephalus quadricornis	MT789711.1
	Perciformes	Trichodontidae	Arctoscopus japonicus	NC_002812.1
	Perciformes	Cyclopteridae	Aptocyclus ventricosus	NC_008129.1
	Perciformes	Liparidae	Liparis tessellatus	NC_046407.1
	Perciformes	Pholidae	Pholis gunnellus	MT410872.1
	Perciformes	Anarhichadidae	Anarhichas lupus	MT410929.1
	Perciformes	Zoarcidae	Lycodes raridens	MN604279.1
	Perciformes	Stichaeidae	Dictyosoma burgeri	MT942974.1
	Perciformes	Hypoptychidae	Hypoptychus dybowskii	NC_004400.1
	Perciformes	Gasterosteidae	Spinachia spinachia	MN122862.1
	Perciformes	Aulorhynchidae	Aulichthys japonicus	NC_011569.1
	Perciformes	Anoplopomatidae	Anoplopoma fimbria	KP777542.1
	Perciformes	Bovichtidae	Bovichtus argentinus	NC_034351.1
	Perciformes	Channichthyidae	Chionobathyscus dewitti	NC_046762.1
	Perciformes	Bathydraconidae	Parachaenichthys charcoti	NC_026578.1
	Perciformes	Nototheniidae	Notothenia rossii	MN893242.1
	Perciformes	Eleginopidae	Eleginops maclovinus	NC_033386.1
	Perciformes	Trachinidae	Echiichthys vipera	MT410919.1
Actinopterygii	Perciformes	Percidae	Perca fluviatilis	MT410943.1
	Perciformes	Hoplichthyidae	Hoplichthys gilberti	NC_034338.1
	Perciformes	Platycephalidae	Platycephalus sp. 1 JJX-2020	MK344191.1
	Perciformes	Serranidae	Epinephelus fuscoguttatus x Epinephelus polyphekadion	MT709279.1
	Percopsiformes	Percopsidae	Percopsis transmontana	NC_003168.1
	Percopsiformes	Aphredoderidae	Aphredoderus sayanus	NC_004372.1
	Pleuronectiformes	Psettodidae	Psettodes erumei	NC_020032.1
	Pleuronectiformes	Scophthalmidae	Zeugopterus punctatus	MT410862.1
	Pleuronectiformes	Rhombosoleidae	Pelotretis flavilatus	NC_026284.1
	Pleuronectiformes	Soleidae	Pardachirus pavoninus	KJ433565.1
	Pleuronectiformes	Cynoglossidae	Cynoglossus nanhaiensis	NC_050921.1
	Pleuronectiformes	Samaridae	Samaris cristatus	NC_025903.1
	Pleuronectiformes	Achiridae	Trinectes maculatus	NC_023769.1
	Pleuronectiformes	Paralichthyidae	Paralichthys dentatus	NC_029476.1
	Pleuronectiformes	Pleuronectidae	Verasper moseri	LC583747.1
	Pleuronectiformes	Bothidae	Grammatobothus polyophthalmus	NC_045092.1
	Pleuronectiformes	Citharidae	Citharoides macrolepis	KJ433560.1
	Polymixiiformes	Polymixiidae	Polymixia lowei	NC_003181.1
	Polypteriformes	Polypteridae	Polypterus mokelembembe	NC_030714.1
	Salmoniformes	Salmonidae	Salvelinus alpinus alpinus	MN957797.1
	Scombriformes	Scombropidae	Scombrops gilberti	NC_028550.1
	Scombriformes	Tetragonuridae	Tetragonurus atlanticus	NC_022500.1
	Scombriformes	Bramidae	Brama dussumieri	MH409959.1
	Scombriformes	Chiasmodontidae	Kali indica	NC_022488.1
	Scombriformes	Ariommatidae	Ariomma indicum	NC_022498.1
	Scombriformes	Nomeidae	Cubiceps squamiceps	NC_029845.1
	Scombriformes	Stromateidae	Pampus cinereus	MH037008.1
	Scombriformes	Centrolophidae	Schedophilus medusophagus	MT410944.1
	Scombriformes	Scombridae	Sarda sarda	MT410877.1
	Scombriformes	Arripidae	Arripis trutta	NC_015787.1
	Scombriformes	Pomatomidae	Pomatomus saltatrix	NC_022507.1
	Scombriformes	Gempylidae	Paradiplospinus antarcticus	MN510443.1
	Scombriformes	Trichiuridae	Trichiurus haumela	NC_042168.1
	Semionotiformes	Lepisosteidae	Atractosteus tristoechus	NC_036329.1
	Siluriformes	Ailiidae	Ailia coila	NC_046497.1
	Siluriformes	Schilbidae	Pareutropius debauwi	NC_015837.1
	Siluriformes	Auchenoglanididae	Auchenoglanis occidentalis	MF124303.1
	Siluriformes	Claroteidae	Chrysichthys nigrodigitatus	NC_042721.1
	Siluriformes	Heteropneustidae	Heteropneustes fossilis	KP345880.1
	Siluriformes	Aspredinidae	Bunocephalus coracoideus	NC_015811.1
	Siluriformes	Plotosidae	Plotosus lineatus	NC_029714.1
	Siluriformes	Cetopsidae	Helogenes marmoratus	AP012014.1
	Siluriformes	Auchenipteridae	Tatia intermedia	MK078120.1
	Siluriformes	Doradidae	Amblydoras gonzalezi	NC_015745.1
	Siluriformes	Siluridae	Pterocryptis anomala	MT433099.1
	Siluriformes	Malapteruridae	Malapterurus electricus	NC_015833.1
	Siluriformes	Mochokidae	Synodontis schoutedeni	NC_015808.1
	Siluriformes	Amblycipitidae	Liobagrus somjinensis	MN756661.1
	Siluriformes	Sisoridae	Pseudecheneis sulcata	MK843301.1
	Siluriformes	Bagridae	Hemibagrus nemurus	NC_044863.1
	Siluriformes	Ariidae	Arius dispar	NC_048969.1
	Siluriformes	Clariidae	Clarias macrocephalus	NC_046749.1
	Siluriformes	Pangasiidae	Pangasius bocourti	NC_046590.1
	Siluriformes	Ictaluridae	Ameiurus catus	MH324425.1
	Siluriformes	Cranoglanididae	Cranoglanis bouderius	AY898626.1
	Siluriformes	Pimelodidae	Phractocephalus hemioliopterus	NC_037886.1
	Siluriformes	Pseudopimelodidae	Lophiosilurus alexandri	KT990219.1
	Siluriformes	Chacidae	Chaca bankanensis	AP012008.1
	Siluriformes	Amphiliidae	Amphilius sp. NM-2010	NC_015746.1
	Siluriformes	Diplomystidae	Diplomystes nahuelbutaensis	NC_015823.1
	Siluriformes	Trichomycteridae	Trichomycterus areolatus	AP012026.1
	Siluriformes	Astroblepidae	Astroblepus sp. NM-2010	AP012004.1
	Siluriformes	Callichthyidae	Corydoras trilineatus	NC_049098.1
	Siluriformes	Loricariidae	Hypostomus ancistroides	MT066232.1
	Spariformes	Sparidae	Dentex hypselosomus	NC_049151.1
	Spariformes	Centracanthidae	Spicara maena	NC_009854.1
	Spariformes	Lethrinidae	Monotaxis grandoculis	NC_010957.1
	Spariformes	Nemipteridae	Nemipterus hexodon	NC_049150.1
	Stomiiformes	Gonostomatidae	Sigmops gracilis	NC_002574.1
	Stomiiformes	Sternoptychidae	Sternoptyx diaphana	MT588184.1
Actinopterygii	Stomiiformes	Diplophidae	Diplophos taenia	NC_002647.1
	Stomiiformes	Stomiidae	Stomias atriventer	NC_037248.1
	Stylephoriformes	Stylephoridae	Stylephorus chordatus	NC_009948.1
	Synbranchiformes	Mastacembelidae	Mastacembelus erythrotaenia	NC_035141.1
	Synbranchiformes	Indostomidae	Indostomus paradoxus	NC_004401.1
	Synbranchiformes	Synbranchidae	Monopterus albus	KP779625.1
	Syngnathiformes	Draconettidae	Draconetta xenica	NC_024185.1
	Syngnathiformes	Fistulariidae	Fistularia petimba	NC_024190.1
	Syngnathiformes	Aulostomidae	Aulostomus chinensis	NC_010269.1
	Syngnathiformes	Centriscidae	Aeoliscus strigatus	NC_010270.1
	Syngnathiformes	Syngnathidae	Trachyrhamphus serratus	MK680823.1
	Syngnathiformes	Solenostomidae	Solenostomus paradoxus	NC_024186.1
	Syngnathiformes	Pegasidae	Pegasus volitans	NC_010271.1
	Syngnathiformes	Dactylopteridae	Dactyloptena orientalis	NC_024189.1
	Syngnathiformes	Callionymidae	Synchiropus sycorax	NC_047299.1
	Syngnathiformes	Mullidae	Mullus surmuletus	MT410885.1
	Tetraodontiformes	Triacanthodidae	Macrorhamphosodes uradoi	NC_009860.1
	Tetraodontiformes	Triacanthidae	Triacanthus biaculeatus	NC_009863.1
	Tetraodontiformes	Balistidae	Abalistes stellaris	MG515171.1
	Tetraodontiformes	Monacanthidae	Thamnaconus hypargyreus	MG739437.1
	Tetraodontiformes	Molidae	Ranzania laevis	NC_007887.1
	Tetraodontiformes	Triodontidae	Triodon macropterus	NC_009859.1
	Tetraodontiformes	Diodontidae	Diodon liturosus	NC_034658.1
	Tetraodontiformes	Tetraodontidae	Tetraodon lineatus	MG913990.1
	Tetraodontiformes	Aracanidae	Anoplocapros lenticularis	NC_011319.1
	Tetraodontiformes	Ostraciidae	Ostracion rhinorhynchos	NC_030005.1
	Trachichthyiformes	Monocentridae	Monocentris japonicus	NC_004392.1
	Trachichthyiformes	Anomalopidae	Anomalops katoptron	NC_008128.1
	Trachichthyiformes	Trachichthyidae	Hoplostethus japonicus	NC_003187.1
	Trachichthyiformes	Diretmidae	Diretmoides veriginae	NC_008126.1
	Trachichthyiformes	Anoplogasteridae	Anoplogaster cornuta	NC_004391.1
	Uranoscopiformes	Uranoscopidae	Uranoscopus cognatus	NC_043875.1
	Uranoscopiformes	Ammodytidae	Gymnammodytes semisquamatus	MT410950.1
	Zeiformes	Oreosomatidae	Neocyttus rhomboidalis	NC_004399.1
	Zeiformes	Zeidae	Zeus faber	MT410863.1
	Zeiformes	Parazenidae	Parazen pacificus	NC_004396.1
	Zeiformes	Zenionidae	Zenion japonicum	NC_004397.1
	Coelacanthiformes	Coelacanthidae	Latimeria menadoensis	GQ911586.1
Dipnoi	Ceratodontiformes	Ceratodontidae	Neoceratodus forsteri	MF489951.1
	Lepidosireniformes	Protopteridae	Protopterus aethiopicus	NC_014764.2
	Lepidosireniformes	Lepidosirenidae	Lepidosiren paradoxa	AF302934.1
Amphibia	Anura	Limnodynastidae	Lechriodus melanopyga	NC_019999.1
	Anura	Pelodytidae	Pelodytes cf. punctatus II-2011	NC_020000.1
	Anura	Mantella	Mantella baroni	NC_039758.1
	Anura	Megophryidae	Oreolalax omeimontis	NC_049862.1
	Anura	Leiopelmatidae	Leiopelma archeyi	HM142901.1
	Anura	Pelobatidae	Pelobates fuscus	MT410942.1
	Anura	Microhylidae	Microhyla fissipes	MH822625.1
	Anura	Hyperoliidae	Hyperolius marmoratus	NC_023381.1
	Anura	Hemisotidae	Hemisus marmoratus	NC_023380.1
	Anura	Pyxicephalidae	Pyxicephalus adspersus	NC_044480.1
	Anura	Ranidae	Odorrana graminea	NC_050884.1
	Anura	Ceratobatrachidae	Cornufer vitianus	NC_027671.1
	Anura	Rhacophoridae	Zhangixalus omeimontis	MN427892.1
	Anura	Dicroglossidae	Quasipaa boulengeri	KY441640.1
	Anura	Sooglossidae	Sooglossus thomasseti	NC_020001.1
	Anura	Calyptocephalellidae	Telmatobufo australis	NC_027274.1
	Anura	Heleophrynidae	Heleophryne regis	NC_019998.1
	Anura	Dendrobatidae	Anomaloglossus baeobatrachus	MK069979.1
	Anura	Bufonidae	Bufotes sitibundus	NC_050665.1
	Anura	Ceratophryidae	Telmatobius chusmisensis	NC_030333.1
	Anura	Hylidae	Dryophytes versicolor	MH087467.1
	Anura	Rhinophrynidae	Rhinophrynus dorsalis	HM991334.1
	Anura	Pipidae	Xenopus fischbergi	NC_044888.1
	Anura	Bombinatoridae	Bombina bombina	NC_042501.1
	Anura	Alytidae	Discoglossus galganoi	AY585339.1
	Caudata	Cryptobranchidae	Andrias davidianus	KU131061.1
	Caudata	Hynobiidae	Pachyhynobius shangchengensis	MK890400.1
	Caudata	Rhyacotritonidae	Rhyacotriton variegatus	AY728219.1
	Caudata	Amphiumidae	Amphiuma means	GQ368656.1
	Caudata	Plethodontidae	Karsenia koreana	MK512368.1
	Caudata	Proteidae	Proteus anguinus	GQ368659.1
	Caudata	Ambystomatidae	Ambystoma talpoideum	NC_039182.1
	Caudata	Dicamptodontidae	Dicamptodon aterrimus	GQ368657.1
	Caudata	Salamandridae	Pachytriton brevipes	MW004669.1
	Caudata	Sirenidae	Siren intermedia	MH888024.1
	Gymnophiona	Chikilidae	Chikila fulleri	NC_021369.1
	Gymnophiona	Rhinatrematidae	Rhinatrema bivittatum	AY456252.1
	Gymnophiona	Herpelidae	Boulengerula taitana	AY954504.1
	Gymnophiona	Indotyphlidae	Gegeneophis ramaswamii	AY456250.1
	Gymnophiona	Siphonopidae	Siphonops annulatus	AY954506.1
	Gymnophiona	Typhlonectidae	Typhlonectes natans	AF154051.1
	Gymnophiona	Caeciliidae	Oscaecilia ochrocephala	GQ244474.1
	Gymnophiona	Scolecomorphidae	Scolecomorphus vittatus	AY456253.1
	Gymnophiona	Ichthyophiidae	Ichthyophis bannanicus	AY458594.1
Reptilia	Crocodylia	Crocodylidae	Crocodylus palustris	MT554049.1
	Crocodylia	Gavialidae	Tomistoma schlegelii	MT554040.1
	Crocodylia	Alligatoridae	Caiman latirostris	MT554051.1
	Sphenodontia	Sphenodontidae	Sphenodon punctatus	MN864228.1
	Squamata	Trogonophidae	Diplometopon zarudnyi	AY605474.1
	Squamata	Dactyloidae	Anolis punctatus	NC_044125.1
	Squamata	Polychrotidae	Polychrus marmoratus	NC_012839.1
	Squamata	Phrynosomatidae	Sceloporus woodi	BK010487.1
	Squamata	Typhlopidae	Xerotyphlops vermicularis	NC_044967.1
	Squamata	Leptotyphlopidae	Rena humilis	NC_005961.1
	Squamata	Xenodermatidae	Achalinus rufescens	NC_032085.1
	Squamata	Hydrophiidae	Hydrophis cyanocinctus	NC_046795.1
	Squamata	Elapidae	Laticauda semifasciata	NC_036055.1
	Squamata	Colubridae	Oligodon chinensis	MK347418.1
	Squamata	Dipsadidae	Hypsiglena jani jani	MT561500.1
	Squamata	Homalopsidae	Hypsiscopus plumbea	NC_010200.1
	Squamata	Viperidae	Bothrops pubescens	MN379927.1
	Squamata	Pareatidae	Pareas boulengeri	NC_050894.1
	Squamata	Acrochordidae	Acrochordus granulatus	NC_007400.1
	Squamata	Pythonidae	Malayopython reticulatus	NC_042397.1
	Squamata	Xenopeltidae	Xenopeltis unicolor	NC_007402.1
	Squamata	Cylindrophiidae	Cylindrophis ruffus	NC_007401.1
	Squamata	Boidae	Eryx tataricus	MN646174.1
	Squamata	Aniliidae	Anilius scytale	FJ755180.1
	Squamata	Tropidophiidae	Tropidophis haetianus	FJ755181.1
	Squamata	Iguanidae	Iguana delicatissima	NC_044899.1
	Squamata	Agamidae	Draco maculatus	NC_047179.1
	Squamata	Chamaeleonidae	Brookesia decaryi	NC_014174.1
	Squamata	Helodermatidae	Heloderma suspectum	NC_008776.1
	Squamata	Anguidae	Anguis graeca	NC_048977.1
	Squamata	Varanidae	Varanus salvator	EU747731.1
	Squamata	Shinisauridae	Shinisaurus crocodilurus	NC_005959.1
	Squamata	Rhineuridae	Rhineura floridana	AY605473.1
	Squamata	Bipedidae	Bipes canaliculatus	AY605484.1
	Squamata	Amphisbaenidae	Geocalamus acutus	AY605476.1
	Squamata	Blanidae	Blanus cinereus	EU443257.1
	Squamata	Lacertidae	Lacerta bilineata	KT722705.2
	Squamata	Gymnophthalmidae	Iphisa elegans	MT472615.1
	Squamata	Scincidae	Tropidophorus hangnam	NC_050664.1
	Squamata	Xantusiidae	Lepidophyma flavimaculatum	NC_008775.1
	Squamata	Cordylidae	Smaug warreni	NC_005962.1
	Squamata	Eublepharidae	Eublepharis macularius	NC_033383.1
	Squamata	Phyllodactylidae	Tarentola mauritanica	EU443255.1
	Squamata	Gekkonidae	Gekko subpalmatus	MK680534.1
	Squamata	Sphaerodactylidae	Teratoscincus roborowskii	MT107158.1
	Squamata	Pygopodidae	Aprasia parapulchella	NC_024557.1
	Testudines	Trionychidae	Chitra vandijki	MT683848.1
	Testudines	Carettochelyidae	Carettochelys insculpta	FJ862792.1
	Testudines	Platysternidae	Platysternon megacephalum	DQ256377.1
	Testudines	Emydidae	Malaclemys terrapin terrapin	NC_031300.1
	Testudines	Geoemydidae	Pangshura sylhetensis	MK580979.1
	Testudines	Testudinidae	Geochelone elegans	NC_041096.1
	Testudines	Cheloniidae	Lepidochelys kempii	MN136061.1
	Testudines	Dermochelyidae	Dermochelys coriacea	MF460363.1
	Testudines	Chelydridae	Chelydra serpentina	DQ256378.1
	Testudines	Kinosternidae	Sternotherus carinatus	HQ114563.1
	Testudines	Chelidae	Emydura tanybaraga	NC_042476.1
	Testudines	Pelomedusidae	Pelusios castaneus	NC_026049.1
	Testudines	Podocnemididae	Podocnemis unifilis	JF802204.1
Aves	Accipitriformes	Pandionidae	Pandion haliaetus	DQ780884.1
	Accipitriformes	Cathartidae	Cathartes aura	AY463690.1
	Accipitriformes	Sagittariidae	Sagittarius serpentarius	NC_023788.1
	Accipitriformes	Accipitridae	Accipiter nisus	MN929010.1
	Anseriformes	Anseranatidae	Anseranas semipalmata	MN356217.1
	Anseriformes	Anatidae	Mareca penelope	NC_050973.1
	Anseriformes	Anhimidae	Chauna torquata	MN356308.1
	Apodiformes	Trochilidae	Lophornis magnificus	NC_033414.1
	Apodiformes	Apodidae	Cypseloides fumigatus	NC_034933.1
	Apterygiformes	Apterygidae	Apteryx rowi	MN356426.1
	Bucerotiformes	Bucorvidae	Bucorvus leadbeateri	NC_015199.1
	Bucerotiformes	Bucerotidae	Rhyticeros undulatus	NC_039950.1
	Caprimulgiformes	Caprimulgidae	Caprimulgus indicus	NC_025773.1
	Caprimulgiformes	Steatornithidae	Steatornis caripensis	MN356409.1
	Caprimulgiformes	Aegothelidae	Aegotheles bennettii	MN356366.1
	Casuariiformes	Casuariidae	Casuarius casuarius	MN356153.1
	Casuariiformes	Dromaiidae	Dromaius novaehollandiae	MN356172.1
	Charadriiformes	Turnicidae	Turnix velox	MN356355.1
	Charadriiformes	Stercorariidae	Stercorarius parasiticus	MN356186.1
	Charadriiformes	Alcidae	Aethia cristatella	NC_045517.1
	Charadriiformes	Laridae	Chroicocephalus brunnicephalus	NC_050864.1
	Charadriiformes	Jacanidae	Hydrophasianus chirurgus	NC_041576.1
	Charadriiformes	Scolopacidae	Tringa nebularia	MG883743.1
	Charadriiformes	Haematopodidae	Haematopus ostralegus	MH727533.1
	Charadriiformes	Recurvirostridae	Himantopus himantopus	NC_035423.1
	Charadriiformes	Charadriidae	Charadrius vociferus	MN356113.1
	Charadriiformes	Burhinidae	Burhinus bistriatus	MN356222.1
	Ciconiiformes	Ciconiidae	Ciconia nigra	MK818509.1
	Ciconiiformes	Pteroclidae	Pterocles burchelli	MN356340.1
	Coliiformes	Coliidae	Urocolius indicus	MN356373.1
	Columbiformes	Columbidae	Columba hodgsonii	NC_048989.1
	Columbiformes	Raphidae	Raphus cucullatus	NC_031864.1
	Coraciiformes	Coraciidae	Eurystomus gularis	MN356271.1
	Coraciiformes	Brachypteraciidae	Brachypteracias leptosomus	MN356322.1
	Coraciiformes	Todidae	Todus mexicanus	MN356280.1
	Coraciiformes	Cerylidae	Chloroceryle aenea	MN356219.1
	Coraciiformes	Alcedinidae	Halcyon senegalensis	MN356338.1
	Coraciiformes	Meropidae	Merops viridis	NC_034642.1
	Cuculiformes	Centropidae	Centropus unirufus	MN356333.1
	Cuculiformes	Cuculidae	Ceuthmochares aereus	MN356158.1
	Cuculiformes	Coccyzidae	Piaya cayana	MN356301.1
	Cuculiformes	Crotophagidae	Crotophaga sulcirostris	MN356290.1
	Cuculiformes	Neomorphidae	Geococcyx californianus	EU410488.1
	Dinornithiformes	Dinornithidae	Dinornis giganteus	AY016013.1
	Dinornithiformes	Emeidae	Anomalopteryx didiformis	MK778441.1
	Falconiformes	Falconidae	Herpetotheres cachinnans	MN356294.1
	Galbuliformes	Bucconidae	Bucco capensis	MN356182.1
	Galliformes	Megapodiidae	Alectura lathami	MN356204.1
	Galliformes	Odontophoridae	Callipepla squamata	MN356397.1
	Galliformes	Phasianidae	Gallus gallus	MN972459.1
	Galliformes	Numididae	Numida meleagris	MN356448.1
	Galliformes	Cracidae	Penelope pileata	MN356179.1
	Gaviiformes	Gaviidae	Gavia arctica	NC_041165.1
	Gruiformes	Psophiidae	Psophia crepitans	MN356218.1
	Gruiformes	Gruidae	Grus americana	MN356326.1
	Gruiformes	Aramidae	Aramus guarauna	MN356244.1
	Gruiformes	Heliornithidae	Heliornis fulica	NC_025499.1
	Gruiformes	Rallidae	Porzana pusilla	MW043485.1
	Gruiformes	Otididae	Ardeotis kori	MN356157.1
	Gruiformes	Rhynochetidae	Rhynochetos jubatus	MN356362.1
	Musophagiformes	Musophagidae	Corythaixoides concolor	MN356307.1
	Passeriformes	Passeriformesincertaesedis	Myzornis pyrrhoura	MK612108.1
	Passeriformes	Pachycephalidae	Pachycephala philippinensis	NC_051019.1
	Passeriformes	Callaeidae	Heteralocha acutirostris	NC_031351.1
	Passeriformes	Locustellidae	Locustella castanea	MN597062.1
	Passeriformes	Dasyornithidae	Dasyornis broadbenti	MN356357.1
Aves	Passeriformes	Artamidae	Gymnorhina tibicen	MN356239.1
	Passeriformes	Philepittidae	Neodrepanis coruscans	MN356283.1
	Passeriformes	Hyliotidae	Hyliota flavigaster	NC_024868.1
	Passeriformes	Scotocercidae	Horornis vulcanius	MN356364.1
	Passeriformes	Dendrocolaptidae	Campylorhamphus procurvoides	NC_051012.1
	Passeriformes	Platysteiridae	Dyaphorophyia castanea	NC_051034.1
	Passeriformes	Acanthisittidae	Acanthisitta chloris	NC_051004.1
	Passeriformes	Cotingidae	Cephalopterus ornatus	NC_051008.1
	Passeriformes	Pipridae	Lepidothrix coronata	MN356387.1
	Passeriformes	Tyrannidae	Pachyramphus minor	NC_051035.1
	Passeriformes	Furnariidae	Sclerurus mexicanus	NC_051010.1
	Passeriformes	Rhinocryptidae	Scytalopus superciliaris	MN356266.1
	Passeriformes	Formicariidae	Formicarius rufipectus	NC_051026.1
	Passeriformes	Thamnophilidae	Sakesphorus luctuosus	NC_051011.1
	Passeriformes	Eurylaimidae	Serilophus lunatus	MN356238.1
	Passeriformes	Pittidae	Pitta sordida	MN356273.1
	Passeriformes	Sittidae	Sitta villosa	MT444149.1
	Passeriformes	Certhiidae	Thryothorus ludovicianus	NC_051032.1
	Passeriformes	Phylloscopidae	Seicercus examinandus	MK695927.1
	Passeriformes	Hirundinidae	Hirundo albigularis	NC_050299.1
	Passeriformes	Pycnonotidae	Pycnonotus jocosus	MN356264.1
	Passeriformes	Picathartidae	Chaetops frenatus	MN356318.1
	Passeriformes	Cinclidae	Cinclus mexicanus	NC_051037.1
	Passeriformes	Turdidae	Catharus fuscescens	NC_051013.1
	Passeriformes	Muscicapidae	Oenanthe oenanthe	NC_051036.1
	Passeriformes	Rhabdornithidae	Rhabdornis inornatus	NC_051020.1
	Passeriformes	Sturnidae	Buphagus erythrorhynchus	MN356312.1
	Passeriformes	Mimidae	Toxostoma redivivum	MN356247.1
	Passeriformes	Mohoidae	Moho braccatus	NC_031348.1
	Passeriformes	Bombycillidae	Phainopepla nitens	MN356259.1
	Passeriformes	Petroicidae	Drymodes brunneopygia	MN356369.1
	Passeriformes	Sylviidae	Hylia prasina	NC_051033.1
	Passeriformes	Timaliidae	Pteruthius melanotis	MN356376.1
	Passeriformes	Leiothrichidae	Turdoides affinis	MN848144.1
	Passeriformes	Zosteropidae	Hypocryptadius cinnamomeus	MN356286.1
	Passeriformes	Stenostiridae	Culicicapa ceylonensis	NC_042191.1
	Passeriformes	Paridae	Parus major	MN356395.1
	Passeriformes	Passerellidae	Zonotrichia albicollis	MN356386.1
	Passeriformes	Thraupidae	Rhodinocichla rosea	MN356164.1
	Passeriformes	Passeridae	Passer domesticus	MN356394.1
	Passeriformes	Icteridae	Quiscalus mexicanus	NC_051021.1
	Passeriformes	Parulidae	Setophaga kirtlandii	NC_051027.1
	Passeriformes	Motacillidae	Motacilla alba	MN356232.1
	Passeriformes	Fringillidae	Loxia leucoptera	NC_051015.1
	Passeriformes	Ploceidae	Ploceus nigricollis	NC_051038.1
	Passeriformes	Estrildidae	Erythrura gouldiae	NC_050680.1
	Passeriformes	Dicaeidae	Dicaeum eximium	NC_051023.1
	Passeriformes	Nectariniidae	Leptocoma aspasia	NC_051024.1
	Passeriformes	Paramythiidae	Oreocharis arfaki	MN356352.1
	Passeriformes	Melanocharitidae	Melanocharis versteri	MN356347.1
	Passeriformes	Alaudidae	Alaudala cheleensis	MN356181.1
	Passeriformes	Rhipiduridae	Rhipidura dahli	NC_051029.1
	Passeriformes	Acanthizidae	Origma solitaria	MN356360.1
	Passeriformes	Orthonychidae	Orthonyx spaldingii	MN356344.1
	Passeriformes	Corvidae	Nucifraga caryocatactes	MT506195.1
	Passeriformes	Malaconotidae	Dryoscopus gambensis	MN356275.1
	Passeriformes	Campephagidae	Edolisoma coerulescens	NC_051017.1
	Passeriformes	Laniidae	Lanius ludovicianus	NC_051030.1
	Passeriformes	Dicruridae	Dicrurus megarhynchus	NC_051028.1
	Passeriformes	Corcoracidae	Struthidea cinerea	MN356345.1
	Passeriformes	Monarchidae	Myiagra hebetior	NC_051022.1
	Passeriformes	Paradisaeidae	Paradisaea raggiana	MN356252.1
	Passeriformes	Vireonidae	Vireo altiloquus	NC_051016.1
	Passeriformes	Cinclosomatidae	Ptilorrhoa leucosticta	NC_051006.1
	Passeriformes	Irenidae	Irena cyanogastra	NC_051018.1
	Passeriformes	Aegithalidae	Aegithalos glaucogularis	NC_024268.1
	Passeriformes	Pardalotidae	Pardalotus punctatus	MN356359.1
	Passeriformes	Maluridae	Malurus elegans	MN356354.1
	Passeriformes	Climacteridae	Climacteris rufus	MN356361.1
	Passeriformes	Meliphagidae	Acanthorhynchus tenuirostris	MT457824.1
Aves	Passeriformes	Menuridae	Atrichornis clamosus	MN356363.1
	Pelecaniformes	Phaethontidae	Phaethon lepturus	NC_027275.1
	Pelecaniformes	Pelecanidae	Pelecanus crispus	MK855120.1
	Pelecaniformes	Ardeidae	Egretta garzetta	MN356129.1
	Pelecaniformes	Threskiornithidae	Mesembrinibis cayennensis	NC_050835.1
	Pelecaniformes	Fregatidae	Fregata magnificens	MN356268.1
	Pelecaniformes	Anhingidae	Anhinga melanogaster	MW042786.1
	Pelecaniformes	Phalacrocoracidae	Nannopterum auritus	MN356400.1
	Pelecaniformes	Sulidae	Morus serrator	GU071056.1
	Phoenicopteriformes	Phoenicopteridae	Phoenicopterus roseus	EF532932.1
	Piciformes	Indicatoridae	Indicator maculatus	MN356234.1
	Piciformes	Picidae	Picoides pubescens	MN356145.1
	Piciformes	Ramphastidae	Pteroglossus azara flavirostris	DQ780882.1
	Piciformes	Megalaimidae	Psilopogon haemacephalus	MN356190.1
	Podicipediformes	Podicipedidae	Tachybaptus novaehollandiae	EF532936.1
	Procellariiformes	Hydrobatidae	Hydrobates tethys	MN356198.1
	Procellariiformes	Pelecanoididae	Pelecanoides urinatrix	MN356319.1
	Procellariiformes	Procellariidae	Pagodroma nivea	NC_050393.1
	Procellariiformes	Diomedeidae	Thalassarche melanophrys	AY158677.2
	Psittaciformes	Psittaculidae	Lorius chlorocercus	MN515396.1
	Psittaciformes	Psittacidae	Amazona guildingii	MN356210.1
	Psittaciformes	Cacatuidae	Eolophus roseicapillus	NC_040154.1
	Rheiformes	Rheidae	Rhea americana	MN356429.1
	Sphenisciformes	Spheniscidae	Aptenodytes patagonicus	NC_045377.1
	Strigiformes	Strigidae	Otus sunia	MN276053.1
	Strigiformes	Tytonidae	Tyto longimembris	KP893332.1
	Struthioniformes	Struthionidae	Struthio camelus	AF338715.1
	Tinamiformes	Tinamidae	Nothoprocta perdicaria	MN356428.1
	Trogoniformes	Trogonidae	Trogon melanurus	MN356299.1
	Upupiformes	Upupidae	Upupa epops	MN356316.1
	Upupiformes	Rhinopomastidae	Rhinopomastus cyanomelas	MN356260.1
Mammalia	Ancodonta	Hippopotamidae	Hippopotamus amphibius	AP003425.1
	Carnivora	Nandiniidae	Nandinia binotata	NC_024567.1
	Carnivora	Eupleridae	Mungotictis decemlineata	NC_027828.1
	Carnivora	Herpestidae	Suricata suricatta	NC_045900.1
	Carnivora	Hyaenidae	Crocuta crocuta	MN320467.1
	Carnivora	Viverridae	Arctictis binturong albifrons	KX449332.1
	Carnivora	Felidae	Felis catus	MT499915.1
	Carnivora	Canidae	Vulpes lagopus	MT883492.1
	Carnivora	Procyonidae	Procyon lotor	MT410951.1
	Carnivora	Mustelidae	Neovison vison	MT410953.1
	Carnivora	Ailuridae	Ailurus fulgens	MK886830.1
	Carnivora	Mephitidae	Conepatus chinga	NC_042596.1
	Carnivora	Otariidae	Otaria byronia	NC_049152.1
	Carnivora	Odobenidae	Odobenus rosmarus rosmarus	NC_004029.2
	Carnivora	Phocidae	Leptonychotes weddellii	MT755639.1
	Carnivora	Ursidae	Ursus thibetanus laniger	MN935768.1
	Cetacea	Balaenidae	Balaena mysticetus	MN124685.1
	Cetacea	Balaenopteridae	Balaenoptera physalus	MT410921.1
	Cetacea	Eschrichtiidae	Eschrichtius robustus	MF409245.1
	Cetacea	Neobalaenidae	Caperea marginata	NC_005269.1
	Cetacea	Physeteridae	Kogia sima	NC_041303.1
	Cetacea	Platanistidae	Platanista minor	NC_005275.1
	Cetacea	Ziphiidae	Hyperoodon ampullatus	MT410957.1
	Cetacea	Iniidae	Inia geoffrensis	NC_005276.1
	Cetacea	Pontoporiidae	Pontoporia blainvillei	NC_005277.1
	Cetacea	Lipotidae	Lipotes vexillifer	AY789529.1
	Cetacea	Phocoenidae	Phocoena phocoena	MT948111.1
	Cetacea	Monodontidae	Monodon monoceros	MT251289.1
	Cetacea	Delphinidae	Lagenorhynchus acutus	NC_050265.1
	Chiroptera	Megadermatidae	Megaderma lyra	MG586969.1
	Chiroptera	Rhinolophidae	Rhinolophus affinis	MT845219.1
	Chiroptera	Hipposideridae	Hipposideros armiger	NC_018540.1
	Chiroptera	Pteropodidae	Rousettus amplexicaudatus	MT259592.1
	Chiroptera	Noctilionidae	Noctilio leporinus	NC_037137.1
	Chiroptera	Furipteridae	Furipterus horrens	NC_048476.1
	Chiroptera	Mormoopidae	Pteronotus parnellii	NC_023368.1
	Chiroptera	Phyllostomidae	Diphylla ecaudata	NC_037138.1
	Chiroptera	Mystacinidae	Mystacina tuberculata	NC_006925.1
	Chiroptera	Vespertilionidae	Myotis bombinus	MT985383.1
Mammalia	Chiroptera	Molossidae	Tadarida latouchei	NC_036331.1
	Chiroptera	Emballonuridae	Saccopteryx leptura	NC_036421.1
	Cingulata	Dasypodidae	Dasypus yepesi	NC_028570.1
	Cingulata	Chlamyphoridae	Euphractus sexcinctus flavimanus	KX151979.1
	Dasyuromorphia	Thylacinidae	Thylacinus cynocephalus	KY678392.1
	Dasyuromorphia	Myrmecobiidae	Myrmecobius fasciatus	FJ515782.1
	Dasyuromorphia	Dasyuridae	Antechinus arktos	NC_050988.1
	Dermoptera	Cynocephalidae	Galeopterus variegatus	AF460846.1
	Didelphimorphia	Didelphidae	Tlacuatzin canescens	NC_029381.1
	Diprotodontia	Phascolarctidae	Phascolarctos cinereus	NC_008133.1
	Diprotodontia	Vombatidae	Vombatus ursinus	MK360903.1
	Diprotodontia	Potoroidae	Potorous tridactylus	NC_006524.1
	Diprotodontia	Phalangeridae	Trichosurus vulpecula	AF357238.1
	Diprotodontia	Tarsipedidae	Tarsipes rostratus	NC_006518.1
	Diprotodontia	Petauridae	Dactylopsila trivirgata	NC_008134.1
	Diprotodontia	Pseudocheiridae	Pseudocheirus peregrinus	NC_006519.1
	Diprotodontia	Acrobatidae	Distoechurus pennatus	NC_008145.1
	Eulipotyphla	Solenodontidae	Solenodon paradoxus woodi	KU697363.1
	Eulipotyphla	Erinaceidae	Neotetracus sinensis	NC_019626.1
	Eulipotyphla	Soricidae	Crocidura tanakae	NC_046831.1
	Hyracoidea	Procaviidae	Procavia capensis	NC_004919.1
	Insectivora	Talpidae	Uropsilus sp. LY-2012	KC516778.1
	Lagomorpha	Ochotonidae	Ochotona dauurica	NC_044120.1
	Lagomorpha	Leporidae	Lepus yarkandensis	MG279351.1
	Macroscelidea	Macroscelididae	Elephantulus revoilii	MT354768.1
	Microbiotheria	Microbiotheriidae	Dromiciops gliroides	NC_005826.1
	Monotremata	Ornithorhynchidae	Ornithorhynchus anatinus	NC_000891.1
	Monotremata	Tachyglossidae	Zaglossus bruijni	NC_006364.1
	Notoryctemorphia	Notoryctidae	Notoryctes typhlops	NC_006522.1
	Paucituberculata	Caenolestidae	Caenolestes fuliginosus	NC_005828.1
	Peramelemorphia	Peroryctidae	Echymipera rufescens australis	AY795975.1
	Peramelemorphia	Peramelidae	Isoodon macrourus	AF358864.1
	Perissodactyla	Equidae	Equus asinus	NC_001788.1
	Perissodactyla	Tapiridae	Tapirus indicus	NC_023838.1
	Perissodactyla	Rhinocerotidae	Rhinoceros unicornis	NC_001779.1
	Pholidota	Manidae	Manis pentadactyla	MT335859.1
	Pilosa	Mylodontidae	Mylodon darwinii	MK903501.1
	Pilosa	Megatheriidae	Nothrotheriops shastensis	NC_042753.1
	Pilosa	Myrmecophagidae	Myrmecophaga tridactyla	MH142215.1
	Pilosa	Cyclopedidae	Cyclopes didactylus	NC_028564.1
	Pilosa	Megalonychidae	Parocnus serus	NC_042754.1
	Pilosa	Bradypodidae	Bradypus tridactylus	NC_037527.1
	Primates	Aotidae	Aotus azarai infulatus	KC592390.1
	Primates	Lorisidae	Nycticebus coucang insularis	NC_040292.1
	Primates	Galagidae	Galago moholi	NC_021949.1
	Primates	Daubentoniidae	Daubentonia madagascariensis	NC_010299.1
	Primates	Paleopropithecidae	Palaeopropithecus ingens	NC_026090.1
	Primates	Indriidae	Avahi laniger	NC_021940.1
	Primates	Lepilemuridae	Lepilemur seali	NC_034731.1
	Primates	Cheirogaleidae	Microcebus murinus	NC_028718.1
	Primates	Lemuridae	Prolemur simus	KX932101.1
	Primates	Pitheciidae	Cheracebus lugens	KC592393.1
	Primates	Cebidae	Sapajus flavius	NC_050883.1
	Primates	Atelidae	Alouatta guariba clamitans	KY202428.1
	Primates	Cercopithecidae	Chlorocebus pygerythrus	MT481926.1
	Primates	Hylobatidae	Hoolock hoolock	NC_033885.1
	Primates	Hominidae	Gorilla gorilla	NC_001645.1
	Primates	Tarsiidae	Carlito syrichta	NC_012774.1
	Proboscidea	Elephantidae	Mammuthus primigenius	MG334281.1
	Rodentia	Myocastoridae	Myocastor coypus	MH182628.1
	Rodentia	Octodontidae	Octodon degus	HM544134.1
	Rodentia	Laonastidae	Laonastes aenigmamus	NC_030184.1
	Rodentia	Thryonomyidae	Thryonomys swinderianus	NC_002658.1
	Rodentia	Bathyergidae	Heterocephalus glaber	JN242813.1
	Rodentia	Caviidae	Cavia porcellus	NC_000884.1
	Rodentia	Erethizontidae	Coendou insidiosus	NC_021387.1
	Rodentia	Ctenomyidae	Ctenomys leucodon	NC_020659.1
	Rodentia	Echimyidae	Proechimys trinitatis	NC_039551.1
	Rodentia	Capromyidae	Geocapromys ingrahami	NC_047305.1
	Rodentia	Chinchillidae	Chinchilla lanigera	NC_021386.1
Mammalia	Rodentia	Hystricidae	Hystrix brachyura	NC_050263.1
	Rodentia	Muridae	Praomys delectorum	MN807618.1
	Rodentia	Cricetidae	Cricetulus barabensis	MN056361.1
	Rodentia	Spalacidae	Eospalax smithii	NC_048987.1
	Rodentia	Dipodidae	Allactaga williamsi	NC_049035.1
	Rodentia	Anomaluridae	Anomalurus pusillus	NC_038174.1
	Rodentia	Castoridae	Castor canadensis	NC_033912.1
	Rodentia	Sciuridae	Callosciurus notatus	MT231329.1
	Rodentia	Gliridae	Muscardinus avellanarius	NC_050264.1
	Ruminantia	Tragulidae	Tragulus napu	NC_035821.1
	Ruminantia	Moschidae	Moschus leucogaster	NC_042604.1
	Ruminantia	Bovidae	Bos grunniens	MT162465.1
	Ruminantia	Giraffidae	Giraffa giraffa angolensis	AP003424.1
	Ruminantia	Antilocapridae	Antilocapra americana	JN632597.1
	Ruminantia	Cervidae	Cervus canadensis	NC_050863.1
	Scandentia	Tupaiidae	Tupaia splendidula	NC_050994.1
	Sirenia	Trichechidae	Trichechus manatus latirostris	MN105083.1
	Sirenia	Dugongidae	Dugong dugon	NC_003314.1
	Suina	Tayassuidae	Pecari tajacu	AP003427.1
	Suina	Suidae	Sus scrofa	MN624263.1
	Tubulidentata	Orycteropodidae	Orycteropus afer	NC_002078.1
	Tylopoda	Camelidae	Camelus ferus	EF212038.2

## Sheet: Taxonomy details
Higher classification	Order(154)	Family(792)	Species(792)	accession no.	Taxonomy
Cyclostomata	Myxiniformes	Myxinidae	Eptatretus burgeri	NC_002807.1	Vertebrata,Cyclostomata,Hyperoartia,Petromyzontiformes,Geotriidae,Geotria
	Petromyzontiformes	Geotriidae	Geotria australis	NC_029404.1	Vertebrata,Cyclostomata,Hyperoartia,Petromyzontiformes,Petromyzontidae,Lampetra
	Petromyzontiformes	Petromyzontidae	Lampetra fluviatilis	Y18683.1	Vertebrata,Cyclostomata,Myxini,Myxiniformes,Myxinidae,Eptatretinae,Eptatretus,unclassifiedEptatretus
Chondrichthyes	Carcharhiniformes	Sphyrnidae	Eusphyra blochii	KJ128290.1	Vertebrata,Chondrichthyes,Elasmobranchii,Galeomorphii,Galeoidea,Carcharhiniformes,Sphyrnidae,Eusphyra
	Carcharhiniformes	Proscylliidae	Proscyllium habereri	NC_030216.1	Vertebrata,Chondrichthyes,Elasmobranchii,Galeomorphii,Galeoidea,Carcharhiniformes,Proscylliidae,Proscyllium
	Carcharhiniformes	Hemigaleidae	Hemipristis elongata	NC_032065.1	Vertebrata,Chondrichthyes,Elasmobranchii,Galeomorphii,Galeoidea,Carcharhiniformes,Hemigaleidae,Hemipristis
	Carcharhiniformes	Carcharhinidae	Carcharhinus amblyrhynchos	MT663280.1	Vertebrata,Chondrichthyes,Elasmobranchii,Galeomorphii,Galeoidea,Carcharhiniformes,Carcharhinidae,Carcharhinus
	Carcharhiniformes	Triakidae	Mustelus mustelus	NC_039629.1	Vertebrata,Chondrichthyes,Elasmobranchii,Galeomorphii,Galeoidea,Carcharhiniformes,Triakidae,Mustelus
	Carcharhiniformes	Scyliorhinidae	Galeus melastomus	NC_049881.1	Vertebrata,Chondrichthyes,Elasmobranchii,Galeomorphii,Galeoidea,Carcharhiniformes,Scyliorhinidae,Galeus
	Chimaeriformes	Callorhinchidae	Callorhinchus milii	HM147137.1	Vertebrata,Chondrichthyes,Holocephali,Chimaeriformes,Callorhinchidae,Callorhinchus
	Chimaeriformes	Chimaeridae	Hydrolagus affinis	NC_047231.1	Vertebrata,Chondrichthyes,Holocephali,Chimaeriformes,Chimaeridae,Hydrolagus
	Heterodontiformes	Heterodontidae	Heterodontus zebra	NC_021615.1	Vertebrata,Chondrichthyes,Elasmobranchii,Galeomorphii,Heterodontoidea,Heterodontiformes,Heterodontidae,Heterodontus
	Hexanchiformes	Chlamydoselachidae	Chlamydoselachus anguineus	KU159431.1	Vertebrata,Chondrichthyes,Elasmobranchii,Squalomorphii,Hexanchiformes,Chlamydoselachidae,Chlamydoselachus
	Hexanchiformes	Hexanchidae	Hexanchus griseus	KF894491.1	Vertebrata,Chondrichthyes,Elasmobranchii,Squalomorphii,Hexanchiformes,Hexanchidae,Hexanchus
	Lamniformes	Megachasmidae	Megachasma pelagios	NC_021442.1	Vertebrata,Chondrichthyes,Elasmobranchii,Galeomorphii,Galeoidea,Lamniformes,Megachasmidae,Megachasma
	Lamniformes	Mitsukurinidae	Mitsukurina owstoni	EU528659.1	Vertebrata,Chondrichthyes,Elasmobranchii,Galeomorphii,Galeoidea,Lamniformes,Mitsukurinidae,Mitsukurina
	Lamniformes	Odontaspididae	Odontaspis ferox	MT702386.1	Vertebrata,Chondrichthyes,Elasmobranchii,Galeomorphii,Galeoidea,Lamniformes,Odontaspididae,Odontaspis
	Lamniformes	Alopiidae	Alopias vulpinus	NC_049866.1	Vertebrata,Chondrichthyes,Elasmobranchii,Galeomorphii,Galeoidea,Lamniformes,Alopiidae,Alopias
	Lamniformes	Pseudocarchariidae	Pseudocarcharias kamoharai	NC_026216.1	Vertebrata,Chondrichthyes,Elasmobranchii,Galeomorphii,Galeoidea,Lamniformes,Pseudocarchariidae,Pseudocarcharias
	Myliobatiformes	Plesiobatidae	Plesiobatis daviesi	AY597334.1	Vertebrata,Chondrichthyes,Elasmobranchii,Batoidea,Myliobatiformes,Plesiobatidae,Plesiobatis
	Myliobatiformes	Potamotrygonidae	Potamotrygon magdalenae	NC_036041.1	Vertebrata,Chondrichthyes,Elasmobranchii,Batoidea,Myliobatiformes,Potamotrygonidae,Potamotrygon
	Myliobatiformes	Dasyatidae	Bathytoshia brevicaudata	MT780270.1	Vertebrata,Chondrichthyes,Elasmobranchii,Batoidea,Myliobatiformes,Dasyatidae,Bathytoshia
	Orectolobiformes	Rhincodontidae	Rhincodon typus	MF872726.1	Vertebrata,Chondrichthyes,Elasmobranchii,Galeomorphii,Galeoidea,Orectolobiformes,Rhincodontidae,Rhincodon
	Orectolobiformes	Stegostomatidae	Stegostoma fasciatum	NC_029480.1	Vertebrata,Chondrichthyes,Elasmobranchii,Galeomorphii,Galeoidea,Orectolobiformes,Stegostomatidae,Stegostoma
	Orectolobiformes	Hemiscylliidae	Hemiscyllium ocellatum	NC_044745.1	Vertebrata,Chondrichthyes,Elasmobranchii,Galeomorphii,Galeoidea,Orectolobiformes,Hemiscylliidae,Hemiscyllium
	Orectolobiformes	Ginglymostomatidae	Ginglymostoma cirratum	NC_030189.1	Vertebrata,Chondrichthyes,Elasmobranchii,Galeomorphii,Galeoidea,Orectolobiformes,Ginglymostomatidae,Ginglymostoma
	Orectolobiformes	Orectolobidae	Orectolobus japonicus	NC_022148.1	Vertebrata,Chondrichthyes,Elasmobranchii,Galeomorphii,Galeoidea,Orectolobiformes,Orectolobidae,Orectolobus
	Pristiformes	Rhinobatidae	Glaucostegus granulatus	MN783017.1	Vertebrata,Chondrichthyes,Elasmobranchii,Batoidea,Pristiformes/Rhiniformesgroup,Rhinobatidae,Glaucostegus
	Pristiformes	Pristidae	Pristis pristis	NC_039438.1	Vertebrata,Chondrichthyes,Elasmobranchii,Batoidea,Pristiformes/Rhiniformesgroup,Pristidae,Pristis
	Pristiformes	Rhynchobatidae	Rhynchobatus laevis	NC_047241.1	Vertebrata,Chondrichthyes,Elasmobranchii,Batoidea,Pristiformes/Rhiniformesgroup,Rhynchobatidae,Rhynchobatus
	Pristiformes	Rhinidae	Rhina ancylostoma	NC_030215.1	Vertebrata,Chondrichthyes,Elasmobranchii,Batoidea,Pristiformes/Rhiniformesgroup,Rhinidae,Rhina
	Pristiophoriformes	Pristiophoridae	Pristiophorus japonicus	NC_024110.1	Vertebrata,Chondrichthyes,Elasmobranchii,Squalomorphii,Pristiophoriformes,Pristiophoridae,Pristiophorus
	Rajiformes	Rajidae	Raja brachyura	MT850125.1	Vertebrata,Chondrichthyes,Elasmobranchii,Batoidea,Rajiformes,Rajidae,Raja
	Rajiformes	Anacanthobatidae	Sinobatis borneensis	NC_030328.1	Vertebrata,Chondrichthyes,Elasmobranchii,Batoidea,Rajiformes,Anacanthobatidae,Sinobatis
	Squaliformes	Dalatiidae	Squaliolus aliae	NC_031508.1	Vertebrata,Chondrichthyes,Elasmobranchii,Squalomorphii,Squaliformes,Dalatiidae,Squaliolus
	Squaliformes	Etmopteridae	Etmopterus spinax	MN122934.1	Vertebrata,Chondrichthyes,Elasmobranchii,Squalomorphii,Squaliformes,Etmopteridae,Etmopterus
	Squaliformes	Somniosidae	Somniosus microcephalus	NC_049864.1	Vertebrata,Chondrichthyes,Elasmobranchii,Squalomorphii,Squaliformes,Somniosidae,Somniosus
	Squaliformes	Squalidae	Squalus brevirostris	NC_034748.1	Vertebrata,Chondrichthyes,Elasmobranchii,Squalomorphii,Squaliformes,Squalidae,Squalus
	Squatiniformes	Squatinidae	Squatina dumeril	NC_048468.1	Vertebrata,Chondrichthyes,Elasmobranchii,Squalomorphii,Squatiniformes,Squatinidae,Squatina
	Torpediniformes	Narcinidae	Narcine bancroftii	NC_034772.1	Vertebrata,Chondrichthyes,Elasmobranchii,Batoidea,Torpediniformes,Narcinidae,Narcine
Actinopterygii	Acanthuriformes	Luvaridae	Luvarus imperialis	NC_009851.1	Vertebrata,Euteleostomi,Actinopterygii,Polypteriformes,Polypteridae,Polypterus
	Acanthuriformes	Acanthuridae	Acanthurus lineatus	NC_010108.2	Vertebrata,Euteleostomi,Actinopterygii,Chondrostei,Acipenseriformes,Polyodontidae,Polyodon
	Acanthuriformes	Zanclidae	Zanclus cornutus	NC_009852.1	Vertebrata,Euteleostomi,Actinopterygii,Chondrostei,Acipenseriformes,Acipenseridae,Pseudoscaphirhynchus
	Acipenseriformes	Polyodontidae	Polyodon spathula	KU985086.2	Vertebrata,Euteleostomi,Actinopterygii,Neopterygii,Holostei,Semionotiformes,Lepisosteidae,Atractosteus
	Acipenseriformes	Acipenseridae	Pseudoscaphirhynchus kaufmanni	NC_050885.1	Vertebrata,Euteleostomi,Actinopterygii,Neopterygii,Holostei,Amiiformes,Amiidae,Amia
	Albuliformes	Albulidae	Pterothrissus gissu	NC_005796.1	Vertebrata,Euteleostomi,Actinopterygii,Neopterygii,Teleostei,Albuliformes,Albulidae,Pterothrissus
	Alepocephaliformes	Leptochilichthyidae	Leptochilichthys agassizii	NC_011006.1	Vertebrata,Euteleostomi,Actinopterygii,Neopterygii,Teleostei,Anguilliformes,Heterenchelyidae,Pythonichthys
	Alepocephaliformes	Platytroctidae	Platytroctes apus	NC_004597.1	Vertebrata,Euteleostomi,Actinopterygii,Neopterygii,Teleostei,Anguilliformes,Muraenidae,Gymnothorax
	Alepocephaliformes	Alepocephalidae	Leptoderma macrophthalmum	NC_015100.1	Vertebrata,Euteleostomi,Actinopterygii,Neopterygii,Teleostei,Anguilliformes,Myrocongridae,Myroconger
	Amiiformes	Amiidae	Amia calva	NC_004742.1	Vertebrata,Euteleostomi,Actinopterygii,Neopterygii,Teleostei,Anguilliformes,Ophichthidae,Xyrias
	Anabantiformes	Channidae	Channa striata	MN205549.1	Vertebrata,Euteleostomi,Actinopterygii,Neopterygii,Teleostei,Anguilliformes,Muraenesocidae,Cynoponticus
	Anabantiformes	Osphronemidae	Betta mahachaiensis	MT682637.1	Vertebrata,Euteleostomi,Actinopterygii,Neopterygii,Teleostei,Anguilliformes,Congridae,Ariosoma
	Anabantiformes	Anabantidae	Anabas testudineus	KX950694.1	Vertebrata,Euteleostomi,Actinopterygii,Neopterygii,Teleostei,Anguilliformes,Nettastomatidae,Leptocephalus
	Anabantiformes	Pristolepididae	Pristolepis rubripinnis	NC_044771.1	Vertebrata,Euteleostomi,Actinopterygii,Neopterygii,Teleostei,Anguilliformes,Derichthyidae,Derichthys
	Anabantiformes	Badidae	Dario dario	MT344964.1	Vertebrata,Euteleostomi,Actinopterygii,Neopterygii,Teleostei,Anguilliformes,Colocongridae,Coloconger
	Anguilliformes	Heterenchelyidae	Pythonichthys microphthalmus	NC_013601.1	Vertebrata,Euteleostomi,Actinopterygii,Neopterygii,Teleostei,Anguilliformes,Cyematidae,Cyema
	Anguilliformes	Muraenidae	Gymnothorax minor	MK204283.1	Vertebrata,Euteleostomi,Actinopterygii,Neopterygii,Teleostei,Anguilliformes,Anguillidae,Anguilla
	Anguilliformes	Myrocongridae	Myroconger compressus	NC_013631.1	Vertebrata,Euteleostomi,Actinopterygii,Neopterygii,Teleostei,Anguilliformes,Serrivomeridae,Serrivomer
	Anguilliformes	Ophichthidae	Xyrias revulsus	KY021065.1	Vertebrata,Euteleostomi,Actinopterygii,Neopterygii,Teleostei,Anguilliformes,Saccopharyngidae,Saccopharynx
	Anguilliformes	Muraenesocidae	Cynoponticus ferox	NC_013617.1	Vertebrata,Euteleostomi,Actinopterygii,Neopterygii,Teleostei,Anguilliformes,Eurypharyngidae,Eurypharynx
	Anguilliformes	Congridae	Ariosoma meeki	KX641476.1	Vertebrata,Euteleostomi,Actinopterygii,Neopterygii,Teleostei,Anguilliformes,Nemichthyidae,Labichthys
	Anguilliformes	Nettastomatidae	Leptocephalus sp. 'type II larva	NC_013615.1	Vertebrata,Euteleostomi,Actinopterygii,Neopterygii,Teleostei,Anguilliformes,Moringuidae,Moringua
	Anguilliformes	Derichthyidae	Derichthys serpentinus	NC_013611.1	Vertebrata,Euteleostomi,Actinopterygii,Neopterygii,Teleostei,Anguilliformes,Chlopsidae,Kaupichthys
	Anguilliformes	Colocongridae	Coloconger cadenati	NC_013606.1	Vertebrata,Euteleostomi,Actinopterygii,Neopterygii,Teleostei,Anguilliformes,Synaphobranchidae,Dysomma
	Anguilliformes	Cyematidae	Cyema atrum	NC_013609.1	Vertebrata,Euteleostomi,Actinopterygii,Neopterygii,Teleostei,Notacanthiformes,Notacanthidae,Notacanthus
	Anguilliformes	Anguillidae	Anguilla anguilla	MT410930.1	Vertebrata,Euteleostomi,Actinopterygii,Neopterygii,Teleostei,Notacanthiformes,Halosauridae,Halosauropsis
	Anguilliformes	Serrivomeridae	Serrivomer sector	NC_013436.1	Vertebrata,Euteleostomi,Actinopterygii,Neopterygii,Teleostei,Elopiformes,Megalopidae,Megalops
	Anguilliformes	Saccopharyngidae	Saccopharynx lavenbergi	NC_005298.1	Vertebrata,Euteleostomi,Actinopterygii,Neopterygii,Teleostei,Elopiformes,Elopidae,Elops
	Anguilliformes	Eurypharyngidae	Eurypharynx pelecanoides	NC_005299.1	Vertebrata,Euteleostomi,Actinopterygii,Neopterygii,Teleostei,Osteoglossocephala,Osteoglossomorpha,Hiodontiformes,Hiodontidae,Hiodon
	Anguilliformes	Nemichthyidae	Labichthys carinatus	NC_013626.2	Vertebrata,Euteleostomi,Actinopterygii,Neopterygii,Teleostei,Osteoglossocephala,Osteoglossomorpha,Osteoglossiformes,Pantodontidae,Pantodon
Actinopterygii	Anguilliformes	Moringuidae	Moringua microchir	NC_013602.1	Vertebrata,Euteleostomi,Actinopterygii,Neopterygii,Teleostei,Osteoglossocephala,Osteoglossomorpha,Osteoglossiformes,Mormyridae,Campylomormyrus
	Anguilliformes	Chlopsidae	Kaupichthys hyoproroides	NC_013607.1	Vertebrata,Euteleostomi,Actinopterygii,Neopterygii,Teleostei,Osteoglossocephala,Osteoglossomorpha,Osteoglossiformes,Gymnarchidae,Gymnarchus
	Anguilliformes	Synaphobranchidae	Dysomma anguillare	MK574146.1	Vertebrata,Euteleostomi,Actinopterygii,Neopterygii,Teleostei,Osteoglossocephala,Osteoglossomorpha,Osteoglossiformes,Notopteridae,Chitala
	Ateleopodiformes	Ateleopodidae	Ijimaia dofleini	NC_003179.1	Vertebrata,Euteleostomi,Actinopterygii,Neopterygii,Teleostei,Osteoglossocephala,Osteoglossomorpha,Osteoglossiformes,Osteoglossidae,Scleropages
	Atheriniformes	Atherinopsidae	Leuresthes tenuis	MN181432.1	Vertebrata,Euteleostomi,Actinopterygii,Neopterygii,Teleostei,Neoteleostei,Ateleopodiformes,Ateleopodidae,Ijimaia
	Atheriniformes	Isonidae	Iso hawaiiensis	NC_011178.1	Vertebrata,Euteleostomi,Actinopterygii,Neopterygii,Teleostei,Neoteleostei,Aulopa,Aulopiformes,Alepisauroidei,Chlorophthalmidae,Chlorophthalmus
	Atheriniformes	Atherinidae	Craterocephalus stramineus	NC_043854.1	Vertebrata,Euteleostomi,Actinopterygii,Neopterygii,Teleostei,Neoteleostei,Aulopa,Aulopiformes,Aulopoidei,Synodontidae,Harpadontinae,Harpadon
	Atheriniformes	Bedotiidae	Bedotia geayi	NC_034336.1	Vertebrata,Euteleostomi,Actinopterygii,Neopterygii,Teleostei,Neoteleostei,Aulopa,Aulopiformes,Aulopoidei,Aulopidae,Hime
	Atheriniformes	Melanotaeniidae	Melanotaenia praecox	NC_030253.1	Vertebrata,Euteleostomi,Actinopterygii,Neopterygii,Teleostei,Neoteleostei,Acanthomorphata,Ophidiaria,Ophidiiformes,Ophidiidae,Sirembo
	Aulopiformes	Chlorophthalmidae	Chlorophthalmus nigromarginatus	NC_027654.1	Vertebrata,Euteleostomi,Actinopterygii,Neopterygii,Teleostei,Neoteleostei,Acanthomorphata,Ophidiaria,Ophidiiformes,Carapidae,Carapus
	Aulopiformes	Synodontidae	Harpadon nehereus	NC_047466.1	Vertebrata,Euteleostomi,Actinopterygii,Neopterygii,Teleostei,Neoteleostei,Acanthomorphata,Ophidiaria,Ophidiiformes,Bythitidae,Diplacanthopoma
	Aulopiformes	Aulopidae	Hime japonica	NC_002674.1	Vertebrata,Euteleostomi,Actinopterygii,Neopterygii,Teleostei,Neoteleostei,Acanthomorphata,Ovalentaria,Atherinomorphae,Cyprinodontiformes,Rivulidae,Kryptolebias
	Batrachoidaria	Batrachoididae	Porichthys myriaster	NC_006920.1	Vertebrata,Euteleostomi,Actinopterygii,Neopterygii,Teleostei,Neoteleostei,Acanthomorphata,Ovalentaria,Atherinomorphae,Cyprinodontiformes,Nothobranchiidae,Nothobranchius
	Beloniformes	Adrianichthyidae	Oryzias celebensis	NC_049128.1	Vertebrata,Euteleostomi,Actinopterygii,Neopterygii,Teleostei,Neoteleostei,Acanthomorphata,Ovalentaria,Atherinomorphae,Cyprinodontiformes,Aplocheilidae,Aplocheilus
	Beloniformes	Zenarchopteridae	Zenarchopterus buffonis	MK600518.1	Vertebrata,Euteleostomi,Actinopterygii,Neopterygii,Teleostei,Neoteleostei,Acanthomorphata,Ovalentaria,Atherinomorphae,Cyprinodontiformes,Goodeidae,Crenichthys
	Beloniformes	Belonidae	Strongylura anastomella	NC_026998.1	Vertebrata,Euteleostomi,Actinopterygii,Neopterygii,Teleostei,Neoteleostei,Acanthomorphata,Ovalentaria,Atherinomorphae,Cyprinodontiformes,Cyprinodontidae,Cyprinodon
	Beloniformes	Exocoetidae	Cheilopogon spilonotopterus	NC_039400.1	Vertebrata,Euteleostomi,Actinopterygii,Neopterygii,Teleostei,Neoteleostei,Acanthomorphata,Ovalentaria,Atherinomorphae,Cyprinodontiformes,Poeciliidae,Poeciliinae,Poecilia
	Beloniformes	Hemiramphidae	Hyporhamphus quoyi	MH714706.1	Vertebrata,Euteleostomi,Actinopterygii,Neopterygii,Teleostei,Neoteleostei,Acanthomorphata,Ovalentaria,Atherinomorphae,Cyprinodontiformes,Fundulidae,Fundulus
	Beryciformes	Rondeletiidae	Rondeletia loricata	NC_003186.1	Vertebrata,Euteleostomi,Actinopterygii,Neopterygii,Teleostei,Neoteleostei,Acanthomorphata,Ovalentaria,Atherinomorphae,Atheriniformes,Atherinopsidae,Atherinopsinae,Leuresthes
	Beryciformes	Barbourisiidae	Barbourisia rufa	NC_012046.1	Vertebrata,Euteleostomi,Actinopterygii,Neopterygii,Teleostei,Neoteleostei,Acanthomorphata,Ovalentaria,Atherinomorphae,Atheriniformes,Isonidae,Iso
	Beryciformes	Cetomimidae	Eutaeniophorus sp. 033-Miya	NC_004390.1	Vertebrata,Euteleostomi,Actinopterygii,Neopterygii,Teleostei,Neoteleostei,Acanthomorphata,Ovalentaria,Atherinomorphae,Atheriniformes,Atherinidae,Atherininae,Craterocephalus
	Beryciformes	Berycidae	Beryx splendens	DQ996312.1	Vertebrata,Euteleostomi,Actinopterygii,Neopterygii,Teleostei,Neoteleostei,Acanthomorphata,Ovalentaria,Atherinomorphae,Atheriniformes,Bedotiidae,Bedotia
	Beryciformes	Melamphaidae	Poromitra oscitans	NC_003172.1	Vertebrata,Euteleostomi,Actinopterygii,Neopterygii,Teleostei,Neoteleostei,Acanthomorphata,Ovalentaria,Atherinomorphae,Atheriniformes,Melanotaeniidae,Melanotaenia
	Blenniiformes	Gobiesocidae	Aspasma minima	NC_008130.1	Vertebrata,Euteleostomi,Actinopterygii,Neopterygii,Teleostei,Neoteleostei,Acanthomorphata,Ovalentaria,Atherinomorphae,Beloniformes,Adrianichthyidae,Oryziinae,Oryzias
	Blenniiformes	Blenniidae	Salarias fasciatus	NC_004412.1	Vertebrata,Euteleostomi,Actinopterygii,Neopterygii,Teleostei,Neoteleostei,Acanthomorphata,Ovalentaria,Atherinomorphae,Beloniformes,Zenarchopteridae,Zenarchopterus
	Caproiformes	Caproidae	Capros aper	NC_010958.1	Vertebrata,Euteleostomi,Actinopterygii,Neopterygii,Teleostei,Neoteleostei,Acanthomorphata,Ovalentaria,Atherinomorphae,Beloniformes,Belonidae,Tylosurus
	Carangiformes	Carangidae	Trachurus trachurus	MT410871.1	Vertebrata,Euteleostomi,Actinopterygii,Neopterygii,Teleostei,Neoteleostei,Acanthomorphata,Ovalentaria,Atherinomorphae,Beloniformes,Exocoetidae,Cheilopogon
	Carangiformes	Coryphaenidae	Coryphaena equiselis	MH576916.1	Vertebrata,Euteleostomi,Actinopterygii,Neopterygii,Teleostei,Neoteleostei,Acanthomorphata,Ovalentaria,Atherinomorphae,Beloniformes,Hemiramphidae,Hyporhamphus
	Carangiformes	Echeneidae	Echeneis naucrates	NC_022508.1	Vertebrata,Euteleostomi,Actinopterygii,Neopterygii,Teleostei,Neoteleostei,Acanthomorphata,Ovalentaria,Blenniimorphae,Blenniiformes,Gobiesocoidei,Gobiesocidae,Gobiesocinae,Aspasma
	Centrarchiformes	Terapontidae	Leiopotherapon unicolor	NC_043855.1	Vertebrata,Euteleostomi,Actinopterygii,Neopterygii,Teleostei,Neoteleostei,Acanthomorphata,Ovalentaria,Blenniimorphae,Blenniiformes,Blennioidei,Blenniidae,Salariinae,Salarias
	Centrarchiformes	Kyphosidae	Girella melanichthys	NC_046940.1	Vertebrata,Euteleostomi,Actinopterygii,Neopterygii,Teleostei,Neoteleostei,Acanthomorphata,Ovalentaria,Cichlomorphae,Cichliformes,Cichlidae,NewWorldcichlids,Cichlasomatinae,Heroini,Heros
	Centrarchiformes	Kuhliidae	Kuhlia mugil	NC_013142.1	Vertebrata,Euteleostomi,Actinopterygii,Neopterygii,Teleostei,Neoteleostei,Acanthomorphata,Anabantaria,Synbranchiformes,Mastacembelidae,Mastacembelus
	Centrarchiformes	Oplegnathidae	Oplegnathus fasciatus	DQ872160.1	Vertebrata,Euteleostomi,Actinopterygii,Neopterygii,Teleostei,Neoteleostei,Acanthomorphata,Anabantaria,Synbranchiformes,Indostomidae,Indostomus
	Centrarchiformes	Percalatidae	Percalates novemaculeata	NC_024850.1	Vertebrata,Euteleostomi,Actinopterygii,Neopterygii,Teleostei,Neoteleostei,Acanthomorphata,Anabantaria,Synbranchiformes,Synbranchidae,Monopterus
	Centrarchiformes	Cirrhitidae	Paracirrhites arcatus	NC_022512.1	Vertebrata,Euteleostomi,Actinopterygii,Neopterygii,Teleostei,Neoteleostei,Acanthomorphata,Anabantaria,Anabantiformes,Channoidei,Channidae,Channa
	Centrarchiformes	Cheilodactylidae	Cheilodactylus quadricornis	NC_028180.1	Vertebrata,Euteleostomi,Actinopterygii,Neopterygii,Teleostei,Neoteleostei,Acanthomorphata,Anabantaria,Anabantiformes,Anabantoidei,Osphronemidae,Betta
	Centrarchiformes	Enoplosidae	Enoplosus armatus	NC_013181.1	Vertebrata,Euteleostomi,Actinopterygii,Neopterygii,Teleostei,Neoteleostei,Acanthomorphata,Anabantaria,Anabantiformes,Anabantoidei,Anabantidae,Anabas
	Centrarchiformes	Sinipercidae	Siniperca fortis	NC_047290.1	Vertebrata,Euteleostomi,Actinopterygii,Neopterygii,Teleostei,Neoteleostei,Acanthomorphata,Anabantaria,Anabantiformes,Nandoidei,Pristolepididae,Pristolepis
	Centrarchiformes	Elassomatidae	Elassoma zonatum	NC_011388.1	Vertebrata,Euteleostomi,Actinopterygii,Neopterygii,Teleostei,Neoteleostei,Acanthomorphata,Anabantaria,Anabantiformes,Nandoidei,Badidae,Dario
	Centrarchiformes	Centrarchidae	Lepomis macrochirus	MK840862.1	Vertebrata,Euteleostomi,Actinopterygii,Neopterygii,Teleostei,Neoteleostei,Acanthomorphata,Carangaria,Pleuronectiformes,Psettodoidei,Psettodidae,Psettodes
	Centrarchiformes	Percichthyidae	Maccullochella peelii	MN842722.1	Vertebrata,Euteleostomi,Actinopterygii,Neopterygii,Teleostei,Neoteleostei,Acanthomorphata,Carangaria,Pleuronectiformes,Pleuronectoidei,Scophthalmidae,Zeugopterus
	Chaetodontiformes	Leiognathidae	Photopectoralis bindus	MG677547.1	Vertebrata,Euteleostomi,Actinopterygii,Neopterygii,Teleostei,Neoteleostei,Acanthomorphata,Carangaria,Pleuronectiformes,Pleuronectoidei,Rhombosoleidae,Pelotretis
	Chaetodontiformes	Chaetodontidae	Chaetodon wiebeli	NC_048979.1	Vertebrata,Euteleostomi,Actinopterygii,Neopterygii,Teleostei,Neoteleostei,Acanthomorphata,Carangaria,Pleuronectiformes,Pleuronectoidei,Soleidae,Pardachirus
	Characiformes	Characoidei	Hyphessobrycon megalopterus	MT185596.1	Vertebrata,Euteleostomi,Actinopterygii,Neopterygii,Teleostei,Neoteleostei,Acanthomorphata,Carangaria,Pleuronectiformes,Pleuronectoidei,Cynoglossidae,Cynoglossinae,Cynoglossus
	Characiformes	Distichodontidae	Distichodus sexfasciatus	NC_015836.1	Vertebrata,Euteleostomi,Actinopterygii,Neopterygii,Teleostei,Neoteleostei,Acanthomorphata,Carangaria,Pleuronectiformes,Pleuronectoidei,Samaridae,Samaris
	Characiformes	Citharinidae	Ichthyborus sp. NM-2010	NC_015752.1	Vertebrata,Euteleostomi,Actinopterygii,Neopterygii,Teleostei,Neoteleostei,Acanthomorphata,Carangaria,Pleuronectiformes,Pleuronectoidei,Achiridae,Trinectes
	Characiformes	Crenuchidae	Crenuchus spilurus	AP011986.1	Vertebrata,Euteleostomi,Actinopterygii,Neopterygii,Teleostei,Neoteleostei,Acanthomorphata,Carangaria,Pleuronectiformes,Pleuronectoidei,Paralichthyidae,Paralichthys
	Characiformes	Acestrorhynchidae	Acestrorhynchus sp. NM-2010	NC_015755.1	Vertebrata,Euteleostomi,Actinopterygii,Neopterygii,Teleostei,Neoteleostei,Acanthomorphata,Carangaria,Pleuronectiformes,Pleuronectoidei,Pleuronectidae,Verasper
	Characiformes	Gasteropelecidae	Carnegiella strigata	AP011983.1	Vertebrata,Euteleostomi,Actinopterygii,Neopterygii,Teleostei,Neoteleostei,Acanthomorphata,Carangaria,Pleuronectiformes,Pleuronectoidei,Bothidae,Grammatobothus
	Characiformes	Hemiodontidae	Hemiodopsis gracilis	NC_015816.1	Vertebrata,Euteleostomi,Actinopterygii,Neopterygii,Teleostei,Neoteleostei,Acanthomorphata,Carangaria,Pleuronectiformes,Pleuronectoidei,Citharidae,Citharoides
	Characiformes	Chalceidae	Chalceus macrolepidotus	NC_004700.1	Vertebrata,Euteleostomi,Actinopterygii,Neopterygii,Teleostei,Neoteleostei,Acanthomorphata,Carangaria,Carangiformes,Carangidae,Trachurus
	Characiformes	Lebiasinidae	Lebiasina astrigata	MH921292.1	Vertebrata,Euteleostomi,Actinopterygii,Neopterygii,Teleostei,Neoteleostei,Acanthomorphata,Carangaria,Carangiformes,Coryphaenidae,Coryphaena
	Characiformes	Ctenoluciidae	Ctenolucius hujeta	AP011987.1	Vertebrata,Euteleostomi,Actinopterygii,Neopterygii,Teleostei,Neoteleostei,Acanthomorphata,Carangaria,Carangiformes,Echeneidae,Echeneis
	Characiformes	Erythrinidae	Hoplias intermedius	NC_033860.1	Vertebrata,Euteleostomi,Actinopterygii,Neopterygii,Teleostei,Neoteleostei,Acanthomorphata,Eupercaria,Lutjaniformes,Lutjanidae,Lutjanus
	Characiformes	Characidae	Hyphessobrycon megalopterus	MT185596.1	Vertebrata,Euteleostomi,Actinopterygii,Neopterygii,Teleostei,Neoteleostei,Acanthomorphata,Eupercaria,Lutjaniformes,Haemulidae,Plectorhinchus
	Characiformes	Hepsetidae	Hepsetus odoe	MH668154.1	Vertebrata,Euteleostomi,Actinopterygii,Neopterygii,Teleostei,Neoteleostei,Acanthomorphata,Carangaria,Istiophoriformes,Istiompax
	Characiformes	Anostomidae	Megaleporinus obtusidens	NC_034945.1	Vertebrata,Euteleostomi,Actinopterygii,Neopterygii,Teleostei,Neoteleostei,Acanthomorphata,Carangaria,Istiophoriformes,Istiophorus
	Characiformes	Alestidae	Micralestes sp. NM-2010	NC_015753.1	Vertebrata,Euteleostomi,Actinopterygii,Neopterygii,Teleostei,Neoteleostei,Acanthomorphata,Carangaria,Istiophoriformes,Makaira
	Characiformes	Curimatidae	Curimata mivartii	NC_025951.1	Vertebrata,Euteleostomi,Actinopterygii,Neopterygii,Teleostei,Neoteleostei,Acanthomorphata,Carangaria,Istiophoriformes,Tetrapturus
	Cichliformes	Cichlidae	Heros severus	MT363636.1	Vertebrata,Euteleostomi,Actinopterygii,Neopterygii,Teleostei,Neoteleostei,Acanthomorphata,Carangaria,Istiophoriformes,Kajikia
	Clupeiformes	Clupeoidei	Ilisha striatula	MK391600.1	Vertebrata,Euteleostomi,Actinopterygii,Neopterygii,Teleostei,Neoteleostei,Acanthomorphata,Carangaria,Istiophoriformes,Xiphiidae,Xiphias
	Clupeiformes	Pristigasteridae	Ilisha striatula	MK391600.1	Vertebrata,Euteleostomi,Actinopterygii,Neopterygii,Teleostei,Neoteleostei,Acanthomorphata,Eupercaria,Centrarchiformes,Terapontoidei,Terapontidae,Leiopotherapon
	Clupeiformes	Chirocentridae	Chirocentrus dorab	AP006229.1	Vertebrata,Euteleostomi,Actinopterygii,Neopterygii,Teleostei,Neoteleostei,Acanthomorphata,Eupercaria,Centrarchiformes,Terapontoidei,Kyphosidae,Girellinae,Girella
	Clupeiformes	Clupeidae	Konosirus punctatus	MT801134.1	Vertebrata,Euteleostomi,Actinopterygii,Neopterygii,Teleostei,Neoteleostei,Acanthomorphata,Eupercaria,Centrarchiformes,Terapontoidei,Kuhliidae,Kuhlia
	Clupeiformes	Engraulidae	Engraulis encrasicolus	MT410920.1	Vertebrata,Euteleostomi,Actinopterygii,Neopterygii,Teleostei,Neoteleostei,Acanthomorphata,Eupercaria,Centrarchiformes,Terapontoidei,Oplegnathidae,Oplegnathus
	Clupeiformes	Denticipitidae	Denticeps clupeoides	NC_007889.1	Vertebrata,Euteleostomi,Actinopterygii,Neopterygii,Teleostei,Neoteleostei,Acanthomorphata,Eupercaria,Centrarchiformes,Percalatoidei,Percalatidae,Percalates
	Cypriniformes	Tanichthyidae	Tanichthys albonubes	NC_015539.1	Vertebrata,Euteleostomi,Actinopterygii,Neopterygii,Teleostei,Neoteleostei,Acanthomorphata,Eupercaria,Centrarchiformes,Cirrhitioidei,Cirrhitidae,Paracirrhites
	Cypriniformes	Cyprinidae	Cyprinus carpio	MK088487.1	Vertebrata,Euteleostomi,Actinopterygii,Neopterygii,Teleostei,Neoteleostei,Acanthomorphata,Eupercaria,Centrarchiformes,Cirrhitioidei,Cheilodactylidae,Cheilodactylus
	Cypriniformes	Leptobarbidae	Leptobarbus hoevenii	NC_015528.1	Vertebrata,Euteleostomi,Actinopterygii,Neopterygii,Teleostei,Neoteleostei,Acanthomorphata,Eupercaria,Centrarchiformes,Centrarchoidei,Enoplosidae,Enoplosus
	Cypriniformes	Gastromyzontidae	Erromyzon sinensis	NC_049573.1	Vertebrata,Euteleostomi,Actinopterygii,Neopterygii,Teleostei,Neoteleostei,Acanthomorphata,Eupercaria,Centrarchiformes,Centrarchoidei,Sinipercidae,Siniperca
Actinopterygii	Cypriniformes	Botiidae	Yasuhikotakia eos	MT800510.1	Vertebrata,Euteleostomi,Actinopterygii,Neopterygii,Teleostei,Neoteleostei,Acanthomorphata,Eupercaria,Centrarchiformes,Centrarchoidei,Elassomatidae,Elassoma
	Cypriniformes	Acheilognathidae	Acheilognathus chankaensis	MN683735.1	Vertebrata,Euteleostomi,Actinopterygii,Neopterygii,Teleostei,Neoteleostei,Acanthomorphata,Eupercaria,Centrarchiformes,Centrarchoidei,Centrarchidae,Lepomis
	Cypriniformes	Xenocyprididae	Megalobrama terminalis	MN725725.1	Vertebrata,Euteleostomi,Actinopterygii,Neopterygii,Teleostei,Neoteleostei,Acanthomorphata,Eupercaria,Centrarchiformes,Percichthyoidei,Percichthyidae,Maccullochella
	Cypriniformes	Leuciscidae	Blicca bjoerkna	MT410960.1	Vertebrata,Euteleostomi,Actinopterygii,Neopterygii,Teleostei,Neoteleostei,Acanthomorphata,Eupercaria,Perciformes,Notothenioidei,Nototheniidae,Notothenia
	Cypriniformes	Tincidae	Tinca tinca	NC_008648.1	Vertebrata,Euteleostomi,Actinopterygii,Neopterygii,Teleostei,Neoteleostei,Acanthomorphata,Eupercaria,Perciformes,Scorpaenoidei,Synanceiidae,Choridactylinae,Inimicus
	Cypriniformes	Gobionidae	Squalidus chankaensis	NC_050647.1	Vertebrata,Euteleostomi,Actinopterygii,Neopterygii,Teleostei,Neoteleostei,Acanthomorphata,Eupercaria,Perciformes,Scorpaenoidei,Scorpaenidae,Scorpaeninae,Scorpaenopsis
	Cypriniformes	Serpenticobitidae	Serpenticobitis octozona	NC_033956.1	Vertebrata,Euteleostomi,Actinopterygii,Neopterygii,Teleostei,Neoteleostei,Acanthomorphata,Eupercaria,Perciformes,Scorpaenoidei,Sebastidae,Sebastinae,Sebastes
	Cypriniformes	Paedocyprididae	Paedocypris carbunculus	MT909825.1	Vertebrata,Euteleostomi,Actinopterygii,Neopterygii,Teleostei,Neoteleostei,Acanthomorphata,Eupercaria,Perciformes,Triglioidei,Peristediidae,Scalicus
	Cypriniformes	Danionidae	Barilius malabaricus	NC_046023.1	Vertebrata,Euteleostomi,Actinopterygii,Neopterygii,Teleostei,Neoteleostei,Acanthomorphata,Eupercaria,Perciformes,Triglioidei,Triglidae,Lepidotrigla
	Cypriniformes	Barbuccidae	Barbucca diabolica	NC_033954.1	Vertebrata,Euteleostomi,Actinopterygii,Neopterygii,Teleostei,Neoteleostei,Acanthomorphata,Eupercaria,Perciformes,Cottioidei,Hexagrammales,Hexagrammidae,Hexagrammos
	Cypriniformes	Psilorhynchidae	Psilorhynchus homaloptera	DQ026436.1	Vertebrata,Euteleostomi,Actinopterygii,Neopterygii,Teleostei,Neoteleostei,Acanthomorphata,Eupercaria,Perciformes,Cottioidei,Cottales,Agonidae,Hemitripterinae,Hemitripterus
	Cypriniformes	Vaillantellidae	Vaillantella maassi	NC_008680.1	Vertebrata,Euteleostomi,Actinopterygii,Neopterygii,Teleostei,Neoteleostei,Acanthomorphata,Eupercaria,Perciformes,Cottioidei,Cottales,Cottidae,Myoxocephalus
	Cypriniformes	Gyrinocheilidae	Gyrinocheilus aymonieri	KY307844.1	Vertebrata,Euteleostomi,Actinopterygii,Neopterygii,Teleostei,Neoteleostei,Acanthomorphata,Eupercaria,Perciformes,Cottioidei,Cottales,Trichodontidae,Arctoscopus
	Cypriniformes	Nemacheilidae	Triplophysa yarkandensis	MN821008.1	Vertebrata,Euteleostomi,Actinopterygii,Neopterygii,Teleostei,Neoteleostei,Acanthomorphata,Eupercaria,Perciformes,Cottioidei,Cottales,Cyclopteridae,Aptocyclus
	Cypriniformes	Ellopostomatidae	Ellopostoma mystax	NC_031642.1	Vertebrata,Euteleostomi,Actinopterygii,Neopterygii,Teleostei,Neoteleostei,Acanthomorphata,Eupercaria,Perciformes,Cottioidei,Cottales,Liparidae,Liparis
	Cypriniformes	Cobitidae	Cobitis hankugensis	MN841275.1	Vertebrata,Euteleostomi,Actinopterygii,Neopterygii,Teleostei,Neoteleostei,Acanthomorphata,Eupercaria,Perciformes,Cottioidei,Zoarcales,Pholidae,Pholis
	Cypriniformes	Balitoridae	Balitora ludongensis	NC_050979.1	Vertebrata,Euteleostomi,Actinopterygii,Neopterygii,Teleostei,Neoteleostei,Acanthomorphata,Eupercaria,Perciformes,Cottioidei,Zoarcales,Anarhichadidae,Anarhichas
	Cypriniformes	Catostomidae	Catostomus commersonii	MH324427.1	Vertebrata,Euteleostomi,Actinopterygii,Neopterygii,Teleostei,Neoteleostei,Acanthomorphata,Eupercaria,Perciformes,Cottioidei,Zoarcales,Zoarcidae,Lycodinae,Lycodes
	Cypriniformes	Cyprinidae	Neolissochilus benasi	MN598560.1	Vertebrata,Euteleostomi,Actinopterygii,Neopterygii,Teleostei,Neoteleostei,Acanthomorphata,Eupercaria,Perciformes,Cottioidei,Zoarcales,Stichaeidae,Xiphisterinae,Dictyosoma
	Cyprinodontiformes	Rivulidae	Kryptolebias hermaphroditus	NC_032387.1	Vertebrata,Euteleostomi,Actinopterygii,Neopterygii,Teleostei,Neoteleostei,Acanthomorphata,Eupercaria,Perciformes,Cottioidei,Gasterosteales,Hypoptychidae,Hypoptychus
	Cyprinodontiformes	Nothobranchiidae	Nothobranchius nubaensis	NC_044427.1	Vertebrata,Euteleostomi,Actinopterygii,Neopterygii,Teleostei,Neoteleostei,Acanthomorphata,Eupercaria,Perciformes,Cottioidei,Gasterosteales,Gasterosteidae,Spinachia
	Cyprinodontiformes	Aplocheilidae	Aplocheilus lineatus	NC_044433.1	Vertebrata,Euteleostomi,Actinopterygii,Neopterygii,Teleostei,Neoteleostei,Acanthomorphata,Eupercaria,Perciformes,Cottioidei,Gasterosteales,Aulorhynchidae,Aulichthys
	Cyprinodontiformes	Goodeidae	Crenichthys baileyi moapae	KY014104.1	Vertebrata,Euteleostomi,Actinopterygii,Neopterygii,Teleostei,Neoteleostei,Acanthomorphata,Eupercaria,Perciformes,Cottioidei,Anoplopomatales,Anoplopomatidae,Anoplopoma
	Cyprinodontiformes	Cyprinodontidae	Cyprinodon diabolis	KX061747.1	Vertebrata,Euteleostomi,Actinopterygii,Neopterygii,Teleostei,Neoteleostei,Acanthomorphata,Eupercaria,Perciformes,Notothenioidei,Bovichtidae,Bovichtus
	Cyprinodontiformes	Poeciliidae	Poecilia formosa	MK263672.1	Vertebrata,Euteleostomi,Actinopterygii,Neopterygii,Teleostei,Neoteleostei,Acanthomorphata,Eupercaria,Perciformes,Notothenioidei,Channichthyidae,Chionobathyscus
	Cyprinodontiformes	Fundulidae	Fundulus heteroclitus	FJ445403.1	Vertebrata,Euteleostomi,Actinopterygii,Neopterygii,Teleostei,Neoteleostei,Acanthomorphata,Eupercaria,Perciformes,Notothenioidei,Bathydraconidae,Parachaenichthys
	Elopiformes	Megalopidae	Megalops cyprinoides	NC_005799.1	Vertebrata,Euteleostomi,Actinopterygii,Neopterygii,Teleostei,Neoteleostei,Acanthomorphata,Eupercaria,Perciformes,Notothenioidei,Nototheniidae,Notothenia
	Elopiformes	Elopidae	Elops hawaiensis	NC_005798.1	Vertebrata,Euteleostomi,Actinopterygii,Neopterygii,Teleostei,Neoteleostei,Acanthomorphata,Eupercaria,Perciformes,Notothenioidei,Eleginopidae,Eleginops
	Ephippiformes	Drepaneidae	Drepane longimana	KP164983.1	Vertebrata,Euteleostomi,Actinopterygii,Neopterygii,Teleostei,Neoteleostei,Acanthomorphata,Eupercaria,Perciformes,Percoidei,Trachinidae,Echiichthys
	Ephippiformes	Ephippidae	Ephippus orbis	NC_027733.1	Vertebrata,Euteleostomi,Actinopterygii,Neopterygii,Teleostei,Neoteleostei,Acanthomorphata,Eupercaria,Perciformes,Percoidei,Percidae,Percinae,Perca
	Esociformes	Esocidae	Esox reichertii	NC_023269.1	Vertebrata,Euteleostomi,Actinopterygii,Neopterygii,Teleostei,Neoteleostei,Acanthomorphata,Eupercaria,Perciformes,Platycephaloidei,Hoplichthyidae,Hoplichthys
	Esociformes	Umbridae	Umbra limi	NC_028282.1	Vertebrata,Euteleostomi,Actinopterygii,Neopterygii,Teleostei,Neoteleostei,Acanthomorphata,Eupercaria,Perciformes,Platycephaloidei,Platycephalidae,Platycephalus,unclassifiedPlatycephalus
	Gadiformes	Bregmacerotidae	Bregmaceros nectabanus	NC_008124.1	Vertebrata,Euteleostomi,Actinopterygii,Neopterygii,Teleostei,Neoteleostei,Acanthomorphata,Eupercaria,Perciformes,Serranoidei,Serranidae,Epinephelinae,Epinephelini,Epinephelus
	Gadiformes	Macrouridae	Macrourus whitsoni	MT157320.1	Vertebrata,Euteleostomi,Actinopterygii,Neopterygii,Teleostei,Neoteleostei,Acanthomorphata,Eupercaria,Uranoscopiformes,Uranoscopidae,Uranoscopus
	Gadiformes	Muraenolepididae	Muraenolepis orangiensis	MT192937.1	Vertebrata,Euteleostomi,Actinopterygii,Neopterygii,Teleostei,Neoteleostei,Acanthomorphata,Eupercaria,Uranoscopiformes,Ammodytidae,Gymnammodytes
	Gadiformes	Lotidae	Lota lota	KC844053.1	Vertebrata,Euteleostomi,Actinopterygii,Neopterygii,Teleostei,Neoteleostei,Acanthomorphata,Eupercaria,Acanthuriformes,Luvaridae,Luvarus
	Gadiformes	Gadidae	Gadus morhua	MN122852.1	Vertebrata,Euteleostomi,Actinopterygii,Neopterygii,Teleostei,Neoteleostei,Acanthomorphata,Eupercaria,Acanthuriformes,Acanthuridae,Acanthurus
	Gadiformes	Moridae	Physiculus japonicus	NC_004377.1	Vertebrata,Euteleostomi,Actinopterygii,Neopterygii,Teleostei,Neoteleostei,Acanthomorphata,Eupercaria,Acanthuriformes,Zanclidae,Zanclus
	Galaxiidae	Galaxiidae	Lovettia sealii	NC_043851.1	Vertebrata,Euteleostomi,Actinopterygii,Neopterygii,Teleostei,Neoteleostei,Acanthomorphata,Eupercaria,Chaetodontiformes,Leiognathidae,Photopectoralis
	Gobiiformes	Trichonotidae	Trichonotus setiger	NC_034345.1	Vertebrata,Euteleostomi,Actinopterygii,Neopterygii,Teleostei,Neoteleostei,Acanthomorphata,Eupercaria,Chaetodontiformes,Chaetodontidae,Chaetodon
	Gobiiformes	Odontobutidae	Neodontobutis hainanensis	NC_049890.1	Vertebrata,Euteleostomi,Actinopterygii,Neopterygii,Teleostei,Neoteleostei,Acanthomorphata,Eupercaria,Ephippiformes,Drepaneidae,Drepane
	Gobiiformes	Eleotridae	Hypseleotris klunzingeri	NC_043852.1	Vertebrata,Euteleostomi,Actinopterygii,Neopterygii,Teleostei,Neoteleostei,Acanthomorphata,Eupercaria,Ephippiformes,Ephippidae,Ephippus
	Gobiiformes	Rhyacichthyidae	Rhyacichthys aspro	NC_004414.1	Vertebrata,Euteleostomi,Actinopterygii,Neopterygii,Teleostei,Neoteleostei,Acanthomorphata,Eupercaria,Labriformes,Odacidae,Olisthops
	Gobiiformes	Kraemeriidae	Kraemeria cunicularia	NC_035716.1	Vertebrata,Euteleostomi,Actinopterygii,Neopterygii,Teleostei,Neoteleostei,Acanthomorphata,Eupercaria,Labriformes,Labridae,Centrolabrus
	Gobiiformes	Gobiidae	Favonigobius reichei	MN617828.1	Vertebrata,Euteleostomi,Actinopterygii,Neopterygii,Teleostei,Neoteleostei,Acanthomorphata,Eupercaria,Pempheriformes,Lateolabracidae,Lateolabrax
	Gonorynchiformes	Gonorynchidae	Gonorynchus greyi	NC_004702.1	Vertebrata,Euteleostomi,Actinopterygii,Neopterygii,Teleostei,Neoteleostei,Acanthomorphata,Eupercaria,Pempheriformes,Acropomatidae,Synagrops
	Gonorynchiformes	Chanidae	Chanos chanos	NC_004693.1	Vertebrata,Euteleostomi,Actinopterygii,Neopterygii,Teleostei,Neoteleostei,Acanthomorphata,Eupercaria,Pempheriformes,Epigonidae,Epigonus
	Gonorynchiformes	Kneriidae	Parakneria cameronensis	NC_007891.1	Vertebrata,Euteleostomi,Actinopterygii,Neopterygii,Teleostei,Neoteleostei,Acanthomorphata,Eupercaria,Pempheriformes,Percophidae,Hemerocoetinae,Acanthaphritis
	Gymnotiformes	Gymnotidae	Gymnotus carapo	AP011979.1	Vertebrata,Euteleostomi,Actinopterygii,Neopterygii,Teleostei,Neoteleostei,Acanthomorphata,Eupercaria,Pempheriformes,Banjosidae,Banjos
	Gymnotiformes	Apteronotidae	Apteronotus rostratus	MH399592.2	Vertebrata,Euteleostomi,Actinopterygii,Neopterygii,Teleostei,Neoteleostei,Acanthomorphata,Eupercaria,Pempheriformes,Pentacerotidae,Pseudopentaceros
	Gymnotiformes	Hypopomidae	Brachyhypopomus occidentalis	MH399591.1	Vertebrata,Euteleostomi,Actinopterygii,Neopterygii,Teleostei,Neoteleostei,Acanthomorphata,Eupercaria,Pempheriformes,Bathyclupeidae,Bathyclupea
	Gymnotiformes	Rhamphichthyidae	Gymnorhamphichthys sp. NM-2010	NC_015754.1	Vertebrata,Euteleostomi,Actinopterygii,Neopterygii,Teleostei,Neoteleostei,Acanthomorphata,Eupercaria,Pempheriformes,Champsodontidae,Champsodon
	Gymnotiformes	Sternopygidae	Sternopygus dariensis	MK530706.1	Vertebrata,Euteleostomi,Actinopterygii,Neopterygii,Teleostei,Neoteleostei,Acanthomorphata,Eupercaria,Lophiiformes,Lophiidae,Lophius
	Hiodontiformes	Hiodontidae	Hiodon tergisus	NC_015082.1	Vertebrata,Euteleostomi,Actinopterygii,Neopterygii,Teleostei,Neoteleostei,Acanthomorphata,Eupercaria,Lophiiformes,Chaunacoidei,Chaunacidae,Chaunax
	Holocentriformes	Holocentridae	Sargocentron spiniferum	NC_030597.1	Vertebrata,Euteleostomi,Actinopterygii,Neopterygii,Teleostei,Neoteleostei,Acanthomorphata,Eupercaria,Lophiiformes,Ceratioidei,Caulophrynidae,Caulophryne
	Istiophoriformes	Istiompax	Istiompax indica	KJ510417.1	Vertebrata,Euteleostomi,Actinopterygii,Neopterygii,Teleostei,Neoteleostei,Acanthomorphata,Eupercaria,Lophiiformes,Ceratioidei,Thaumatichthyidae,Thaumatichthys
	Istiophoriformes	Istiophorus	Istiophorus platypterus	KU315124.1	Vertebrata,Euteleostomi,Actinopterygii,Neopterygii,Teleostei,Neoteleostei,Acanthomorphata,Eupercaria,Lophiiformes,Ceratioidei,Linophrynidae,Haplophryne
	Istiophoriformes	Makaira	Makaira nigricans	NC_030006.1	Vertebrata,Euteleostomi,Actinopterygii,Neopterygii,Teleostei,Neoteleostei,Acanthomorphata,Eupercaria,Lophiiformes,Ceratioidei,Neoceratiidae,Neoceratias
	Istiophoriformes	Tetrapturus	Tetrapturus georgii	NC_030009.1	Vertebrata,Euteleostomi,Actinopterygii,Neopterygii,Teleostei,Neoteleostei,Acanthomorphata,Eupercaria,Lophiiformes,Ceratioidei,Diceratiidae,Bufoceratias
	Istiophoriformes	Kajikia	Kajikia albida	NC_030010.1	Vertebrata,Euteleostomi,Actinopterygii,Neopterygii,Teleostei,Neoteleostei,Acanthomorphata,Eupercaria,Lophiiformes,Ceratioidei,Himantolophidae,Himantolophus
	Istiophoriformes	Xiphiidae	Xiphias gladius	NC_012677.1	Vertebrata,Euteleostomi,Actinopterygii,Neopterygii,Teleostei,Neoteleostei,Acanthomorphata,Eupercaria,Lophiiformes,Ceratioidei,Melanocetidae,Melanocetus
	Kurtiformes	Kurtidae	Kurtus gulliveri	NC_022477.1	Vertebrata,Euteleostomi,Actinopterygii,Neopterygii,Teleostei,Neoteleostei,Acanthomorphata,Eupercaria,Lophiiformes,Ceratioidei,Oneirodidae,Oneirodes
	Kurtiformes	Apogonidae	Ostorhinchus novemfasciatus	MW007385.1	Vertebrata,Euteleostomi,Actinopterygii,Neopterygii,Teleostei,Neoteleostei,Acanthomorphata,Eupercaria,Lophiiformes,Ceratioidei,Ceratiidae,Ceratias
	Labriformes	Odacidae	Olisthops cyanomelas	NC_009061.1	Vertebrata,Euteleostomi,Actinopterygii,Neopterygii,Teleostei,Neoteleostei,Acanthomorphata,Eupercaria,Lophiiformes,Ceratioidei,Gigantactinidae,Gigantactis
	Labriformes	Labridae	Centrolabrus exoletus	MT410926.1	Vertebrata,Euteleostomi,Actinopterygii,Neopterygii,Teleostei,Neoteleostei,Acanthomorphata,Eupercaria,Lophiiformes,Ogcocephalidae,Coelophrys
	Lampriformes	Regalecidae	Regalecus glesne	MK209627.1	Vertebrata,Euteleostomi,Actinopterygii,Neopterygii,Teleostei,Neoteleostei,Acanthomorphata,Eupercaria,Tetraodontiformes,Triacanthodoidei,Triacanthodidae,Macrorhamphosodes
	Lampriformes	Trachipteridae	Trachipterus trachypterus	NC_003166.1	Vertebrata,Euteleostomi,Actinopterygii,Neopterygii,Teleostei,Neoteleostei,Acanthomorphata,Eupercaria,Tetraodontiformes,Triacanthoidea,Triacanthidae,Triacanthus
	Lampriformes	Lampridae	Lampris guttatus	NC_003165.1	Vertebrata,Euteleostomi,Actinopterygii,Neopterygii,Teleostei,Neoteleostei,Acanthomorphata,Eupercaria,Tetraodontiformes,Balistidae,Abalistes
	Lobotiformes	Hapalogenyidae	Hapalogenys analis	MT561534.1	Vertebrata,Euteleostomi,Actinopterygii,Neopterygii,Teleostei,Neoteleostei,Acanthomorphata,Eupercaria,Tetraodontiformes,Monacanthidae,Thamnaconus
	Lobotiformes	Datnioididae	Datnioides microlepis	NC_030278.1	Vertebrata,Euteleostomi,Actinopterygii,Neopterygii,Teleostei,Neoteleostei,Acanthomorphata,Eupercaria,Tetraodontiformes,Molidae,Ranzania
Actinopterygii	Lophiiformes	Lophiidae	Lophius piscatorius	MN240767.1	Vertebrata,Euteleostomi,Actinopterygii,Neopterygii,Teleostei,Neoteleostei,Acanthomorphata,Eupercaria,Tetraodontiformes,Triodontidae,Triodon
	Lophiiformes	Chaunacidae	Chaunax pictus	NC_013883.1	Vertebrata,Euteleostomi,Actinopterygii,Neopterygii,Teleostei,Neoteleostei,Acanthomorphata,Eupercaria,Tetraodontiformes,Diodontidae,Diodon
	Lophiiformes	Caulophrynidae	Caulophryne pelagica	NC_016020.1	Vertebrata,Euteleostomi,Actinopterygii,Neopterygii,Teleostei,Neoteleostei,Acanthomorphata,Eupercaria,Tetraodontiformes,Tetradontoidea,Tetraodontidae,Tetraodon
	Lophiiformes	Thaumatichthyidae	Thaumatichthys pagidostomus	NC_013875.1	Vertebrata,Euteleostomi,Actinopterygii,Neopterygii,Teleostei,Neoteleostei,Acanthomorphata,Eupercaria,Tetraodontiformes,Aracanidae,Anoplocapros
	Lophiiformes	Linophrynidae	Haplophryne mollis	NC_013865.1	Vertebrata,Euteleostomi,Actinopterygii,Neopterygii,Teleostei,Neoteleostei,Acanthomorphata,Eupercaria,Tetraodontiformes,Ostraciidae,Ostracion
	Lophiiformes	Neoceratiidae	Neoceratias spinifer	NC_013864.1	Vertebrata,Euteleostomi,Actinopterygii,Neopterygii,Teleostei,Neoteleostei,Acanthomorphata,Eupercaria,Spariformes,Sparidae,Dentex
	Lophiiformes	Diceratiidae	Bufoceratias thele	NC_013869.1	Vertebrata,Euteleostomi,Actinopterygii,Neopterygii,Teleostei,Neoteleostei,Acanthomorphata,Eupercaria,Spariformes,Centracanthidae,Spicara
	Lophiiformes	Himantolophidae	Himantolophus groenlandicus	NC_013868.1	Vertebrata,Euteleostomi,Actinopterygii,Neopterygii,Teleostei,Neoteleostei,Acanthomorphata,Eupercaria,Spariformes,Lethrinidae,Lethrininae,Lethrinus
	Lophiiformes	Melanocetidae	Melanocetus murrayi	NC_004384.1	Vertebrata,Euteleostomi,Actinopterygii,Neopterygii,Teleostei,Neoteleostei,Acanthomorphata,Eupercaria,Spariformes,Nemipteridae,Nemipterus
	Lophiiformes	Oneirodidae	Oneirodes thompsoni	NC_013871.1	Vertebrata,Euteleostomi,Actinopterygii,Neopterygii,Teleostei,Neoteleostei,Acanthomorphata,Eupercaria,Lobotiformes,Hapalogenyidae,Hapalogenys
	Lophiiformes	Ceratiidae	Ceratias uranoscopus	NC_013882.1	Vertebrata,Euteleostomi,Actinopterygii,Neopterygii,Teleostei,Neoteleostei,Acanthomorphata,Eupercaria,Lobotiformes,Datnioididae,Datnioides
	Lophiiformes	Gigantactinidae	Gigantactis vanhoeffeni	NC_013885.1	Vertebrata,Euteleostomi,Actinopterygii,Neopterygii,Teleostei,Neoteleostei,Acanthomorphata,Gobiaria,Gobiiformes,Trichonotoidei,Trichonotidae,Trichonotus
	Lophiiformes	Ogcocephalidae	Coelophrys brevicaudata	NC_013886.1	Vertebrata,Euteleostomi,Actinopterygii,Neopterygii,Teleostei,Neoteleostei,Acanthomorphata,Gobiaria,Gobiiformes,Gobioidei,Odontobutidae,Neodontobutis
	Lutjaniformes	Lutjanidae	Lutjanus carponotatus	NC_044104.1	Vertebrata,Euteleostomi,Actinopterygii,Neopterygii,Teleostei,Neoteleostei,Acanthomorphata,Gobiaria,Gobiiformes,Eleotroidei,Eleotridae,Eleotrinae,Hypseleotris
	Lutjaniformes	Haemulidae	Plectorhinchus vittatus	NC_027098.1	Vertebrata,Euteleostomi,Actinopterygii,Neopterygii,Teleostei,Neoteleostei,Acanthomorphata,Gobiaria,Gobiiformes,Gobioidei,Rhyacichthyidae,Rhyacichthys
	Myctophiformes	Myctophidae	Benthosema pterotum	NC_047480.1	Vertebrata,Euteleostomi,Actinopterygii,Neopterygii,Teleostei,Neoteleostei,Acanthomorphata,Gobiaria,Gobiiformes,Gobioidei,Kraemeriidae,Kraemeria
	Myctophiformes	Neoscopelidae	Neoscopelus microchir	NC_003180.1	Vertebrata,Euteleostomi,Actinopterygii,Neopterygii,Teleostei,Neoteleostei,Acanthomorphata,Gobiaria,Gobiiformes,Gobioidei,Gobiidae,Gobiinae,Favonigobius
	Notacanthiformes	Notacanthidae	Notacanthus bonaparte	NC_047186.1	Vertebrata,Euteleostomi,Actinopterygii,Neopterygii,Teleostei,Neoteleostei,Acanthomorphata,Gobiaria,Kurtiformes,Kurtoidei,Kurtidae,Kurtus
	Notacanthiformes	Halosauridae	Halosauropsis macrochir	NC_035885.1	Vertebrata,Euteleostomi,Actinopterygii,Neopterygii,Teleostei,Neoteleostei,Acanthomorphata,Gobiaria,Kurtiformes,Apogonoidei,Apogonidae,Apogoninae,Ostorhinchus
	Ophidiiformes	Ophidiidae	Sirembo imberbis	MN937450.1	Vertebrata,Euteleostomi,Actinopterygii,Neopterygii,Teleostei,Neoteleostei,Acanthomorphata,Pelagiaria,Scombriformes,Scombropidae,Scombrops
	Ophidiiformes	Carapidae	Carapus bermudensis	NC_004373.1	Vertebrata,Euteleostomi,Actinopterygii,Neopterygii,Teleostei,Neoteleostei,Acanthomorphata,Pelagiaria,Scombriformes,Tetragonuridae,Tetragonurus
	Ophidiiformes	Bythitidae	Diplacanthopoma brachysoma	NC_004376.1	Vertebrata,Euteleostomi,Actinopterygii,Neopterygii,Teleostei,Neoteleostei,Acanthomorphata,Pelagiaria,Scombriformes,Bramidae,Brama
	Osmeriformes	Salanx	Salanx cuvieri	NC_029156.1	Vertebrata,Euteleostomi,Actinopterygii,Neopterygii,Teleostei,Neoteleostei,Acanthomorphata,Pelagiaria,Scombriformes,Chiasmodontidae,Kali
	Osmeriformes	Protosalanx	Protosalanx chinensis	NC_042393.1	Vertebrata,Euteleostomi,Actinopterygii,Neopterygii,Teleostei,Neoteleostei,Acanthomorphata,Pelagiaria,Scombriformes,Ariommatidae,Ariomma
	Osmeriformes	Neosalanx	Neosalanx taihuensis	MH348204.1	Vertebrata,Euteleostomi,Actinopterygii,Neopterygii,Teleostei,Neoteleostei,Acanthomorphata,Pelagiaria,Scombriformes,Nomeidae,Cubiceps
	Osmeriformes	Salangichthys	Salangichthys microdon	NC_004599.1	Vertebrata,Euteleostomi,Actinopterygii,Neopterygii,Teleostei,Neoteleostei,Acanthomorphata,Pelagiaria,Scombriformes,Stromateidae,Pampus
	Osmeriformes	Hemisalanx	Hemisalanx brachyrostralis	NC_029157.1	Vertebrata,Euteleostomi,Actinopterygii,Neopterygii,Teleostei,Neoteleostei,Acanthomorphata,Pelagiaria,Scombriformes,Centrolophidae,Schedophilus
	Osmeriformes	Plecoglossus	Plecoglossus altivelis	EU124683.1	Vertebrata,Euteleostomi,Actinopterygii,Neopterygii,Teleostei,Neoteleostei,Acanthomorphata,Pelagiaria,Scombriformes,Scombridae,Sarda
	Osmeriformes	Mallotus	Mallotus villosus	HM106491.1	Vertebrata,Euteleostomi,Actinopterygii,Neopterygii,Teleostei,Neoteleostei,Acanthomorphata,Pelagiaria,Scombriformes,Arripidae,Arripis
	Osmeriformes	Retropinnidae	Retropinna semoni	NC_031372.1	Vertebrata,Euteleostomi,Actinopterygii,Neopterygii,Teleostei,Neoteleostei,Acanthomorphata,Pelagiaria,Scombriformes,Pomatomidae,Pomatomus
	Osmeriformes	Osmeridae	Osmerus eperlanus	MT410880.1	Vertebrata,Euteleostomi,Actinopterygii,Neopterygii,Teleostei,Neoteleostei,Acanthomorphata,Pelagiaria,Scombriformes,Gempylidae,Paradiplospinus
	Osteoglossiformes	Pantodontidae	Pantodon buchholzi	NC_003096.1	Vertebrata,Euteleostomi,Actinopterygii,Neopterygii,Teleostei,Neoteleostei,Acanthomorphata,Pelagiaria,Scombriformes,Trichiuridae,Trichiurus
	Osteoglossiformes	Mormyridae	Cyphomyrus discorhynchus	NC_015105.1	Vertebrata,Euteleostomi,Actinopterygii,Neopterygii,Teleostei,Neoteleostei,Acanthomorphata,Syngnathiaria,Syngnathiformes,Callionymoidei,Draconettidae,Draconetta
	Osteoglossiformes	Gymnarchidae	Gymnarchus niloticus	NC_012707.1	Vertebrata,Euteleostomi,Actinopterygii,Neopterygii,Teleostei,Neoteleostei,Acanthomorphata,Syngnathiaria,Syngnathiformes,Syngnathiformesincertaesedis,Fistulariidae,Fistularia
	Osteoglossiformes	Notopteridae	Chitala chitala	KX894524.1	Vertebrata,Euteleostomi,Actinopterygii,Neopterygii,Teleostei,Neoteleostei,Acanthomorphata,Syngnathiaria,Syngnathiformes,Syngnathiformesincertaesedis,Aulostomidae,Aulostomus
	Osteoglossiformes	Osteoglossidae	Scleropages formosus	KY131791.1	Vertebrata,Euteleostomi,Actinopterygii,Neopterygii,Teleostei,Neoteleostei,Acanthomorphata,Syngnathiaria,Syngnathiformes,Syngnathiformesincertaesedis,Centriscidae,Centriscinae,Aeoliscus
	Pempheriformes	Lateolabracidae	Lateolabrax maculatus	NC_018045.1	Vertebrata,Euteleostomi,Actinopterygii,Neopterygii,Teleostei,Neoteleostei,Acanthomorphata,Syngnathiaria,Syngnathiformes,Syngnathoidei,Syngnathidae,Trachyrhamphus
	Pempheriformes	Acropomatidae	Synagrops japonicus	NC_034335.1	Vertebrata,Euteleostomi,Actinopterygii,Neopterygii,Teleostei,Neoteleostei,Acanthomorphata,Syngnathiaria,Syngnathiformes,Syngnathoidei,Solenostomidae,Solenostomus
	Pempheriformes	Epigonidae	Epigonus denticulatus	NC_034334.1	Vertebrata,Euteleostomi,Actinopterygii,Neopterygii,Teleostei,Neoteleostei,Acanthomorphata,Syngnathiaria,Syngnathiformes,Syngnathoidei,Pegasidae,Pegasus
	Pempheriformes	Percophidae	Acanthaphritis unoorum	NC_034344.1	Vertebrata,Euteleostomi,Actinopterygii,Neopterygii,Teleostei,Neoteleostei,Acanthomorphata,Syngnathiaria,Syngnathiformes,Dactylopteroidei,Dactylopteridae,Dactyloptena
	Pempheriformes	Banjosidae	Banjos banjos	NC_028165.1	Vertebrata,Euteleostomi,Actinopterygii,Neopterygii,Teleostei,Neoteleostei,Acanthomorphata,Syngnathiaria,Syngnathiformes,Callionymoidei,Callionymidae,Synchiropus
	Pempheriformes	Pentacerotidae	Pseudopentaceros richardsoni	NC_020016.1	Vertebrata,Euteleostomi,Actinopterygii,Neopterygii,Teleostei,Neoteleostei,Acanthomorphata,Syngnathiaria,Syngnathiformes,Mulloidea,Mullidae,Mullus
	Pempheriformes	Bathyclupeidae	Bathyclupea megaceps	NC_034342.1	Vertebrata,Euteleostomi,Actinopterygii,Neopterygii,Teleostei,Neoteleostei,Acanthomorphata,Holocentriformes,Holocentridae,Sargocentron
	Pempheriformes	Champsodontidae	Champsodon cf. snyderi CBM-ZF 10876	NC_022483.1	Vertebrata,Euteleostomi,Actinopterygii,Neopterygii,Teleostei,Neoteleostei,Acanthomorphata,Berycimorphaceae,Beryciformes,Rondeletiidae,Rondeletia
	Perciformes	Notothenioidei	Notothenia rossii	MN893242.1	Vertebrata,Euteleostomi,Actinopterygii,Neopterygii,Teleostei,Neoteleostei,Acanthomorphata,Berycimorphaceae,Beryciformes,Barbourisiidae,Barbourisia
	Perciformes	Synanceiidae	Inimicus japonicus	NC_050964.1	Vertebrata,Euteleostomi,Actinopterygii,Neopterygii,Teleostei,Neoteleostei,Acanthomorphata,Berycimorphaceae,Beryciformes,Cetomimidae,Eutaeniophorus,unclassifiedEutaeniophorus
	Perciformes	Scorpaenidae	Scorpaenopsis cirrosa	NC_027735.1	Vertebrata,Euteleostomi,Actinopterygii,Neopterygii,Teleostei,Neoteleostei,Acanthomorphata,Berycimorphaceae,Beryciformes,Berycidae,Beryx
	Perciformes	Sebastidae	Sebastes viviparus	MT410865.1	Vertebrata,Euteleostomi,Actinopterygii,Neopterygii,Teleostei,Neoteleostei,Acanthomorphata,Berycimorphaceae,Beryciformes,Melamphaidae,Poromitra
	Perciformes	Peristediidae	Scalicus amiscus	NC_004403.1	Vertebrata,Euteleostomi,Actinopterygii,Neopterygii,Teleostei,Neoteleostei,Acanthomorphata,Lampriformes,Regalecidae,Regalecus
	Perciformes	Triglidae	Lepidotrigla hime	MN737591.1	Vertebrata,Euteleostomi,Actinopterygii,Neopterygii,Teleostei,Neoteleostei,Acanthomorphata,Lampriformes,Trachipteridae,Trachipterus
	Perciformes	Hexagrammidae	Hexagrammos agrammus	MT363637.1	Vertebrata,Euteleostomi,Actinopterygii,Neopterygii,Teleostei,Neoteleostei,Acanthomorphata,Lampriformes,Lampridae,Lampris
	Perciformes	Agonidae	Hemitripterus villosus	NC_046471.1	Vertebrata,Euteleostomi,Actinopterygii,Neopterygii,Teleostei,Neoteleostei,Acanthomorphata,Polymixiiformes,Polymixiidae,Polymixia
	Perciformes	Cottidae	Myoxocephalus quadricornis	MT789711.1	Vertebrata,Euteleostomi,Actinopterygii,Neopterygii,Teleostei,Neoteleostei,Acanthomorphata,Percopsaria,Percopsiformes,Percopsoidei,Percopsidae,Percopsis
	Perciformes	Trichodontidae	Arctoscopus japonicus	NC_002812.1	Vertebrata,Euteleostomi,Actinopterygii,Neopterygii,Teleostei,Neoteleostei,Acanthomorphata,Percopsaria,Percopsiformes,Aphredoderoidei,Aphredoderidae,Aphredoderus
	Perciformes	Cyclopteridae	Aptocyclus ventricosus	NC_008129.1	Vertebrata,Euteleostomi,Actinopterygii,Neopterygii,Teleostei,Neoteleostei,Acanthomorphata,Zeiogadaria,Gadariae,Stylephoriformes,Stylephoridae,Stylephorus
	Perciformes	Liparidae	Liparis tessellatus	NC_046407.1	Vertebrata,Euteleostomi,Actinopterygii,Neopterygii,Teleostei,Neoteleostei,Acanthomorphata,Zeiogadaria,Gadariae,Gadiformes,Gadoidei,Bregmacerotidae,Bregmaceros
	Perciformes	Pholidae	Pholis gunnellus	MT410872.1	Vertebrata,Euteleostomi,Actinopterygii,Neopterygii,Teleostei,Neoteleostei,Acanthomorphata,Zeiogadaria,Gadariae,Gadiformes,Macrouroidei,Macrouridae,Macrourinae,Macrourus
	Perciformes	Anarhichadidae	Anarhichas lupus	MT410929.1	Vertebrata,Euteleostomi,Actinopterygii,Neopterygii,Teleostei,Neoteleostei,Acanthomorphata,Zeiogadaria,Gadariae,Gadiformes,Muraenolepidoidei,Muraenolepididae,Muraenolepis
	Perciformes	Zoarcidae	Lycodes raridens	MN604279.1	Vertebrata,Euteleostomi,Actinopterygii,Neopterygii,Teleostei,Neoteleostei,Acanthomorphata,Zeiogadaria,Gadariae,Gadiformes,Gadoidei,Lotidae,Lota
	Perciformes	Stichaeidae	Dictyosoma burgeri	MT942974.1	Vertebrata,Euteleostomi,Actinopterygii,Neopterygii,Teleostei,Neoteleostei,Acanthomorphata,Zeiogadaria,Gadariae,Gadiformes,Gadoidei,Gadidae,Gadus
	Perciformes	Hypoptychidae	Hypoptychus dybowskii	NC_004400.1	Vertebrata,Euteleostomi,Actinopterygii,Neopterygii,Teleostei,Neoteleostei,Acanthomorphata,Zeiogadaria,Gadariae,Gadiformes,Gadoidei,Moridae,Physiculus
	Perciformes	Gasterosteidae	Spinachia spinachia	MN122862.1	Vertebrata,Euteleostomi,Actinopterygii,Neopterygii,Teleostei,Neoteleostei,Acanthomorphata,Zeiogadaria,Zeariae,Zeiformes,Oreosomatidae,Neocyttus
	Perciformes	Aulorhynchidae	Aulichthys japonicus	NC_011569.1	Vertebrata,Euteleostomi,Actinopterygii,Neopterygii,Teleostei,Neoteleostei,Acanthomorphata,Zeiogadaria,Zeariae,Zeiformes,Zeidae,Zeus
	Perciformes	Anoplopomatidae	Anoplopoma fimbria	KP777542.1	Vertebrata,Euteleostomi,Actinopterygii,Neopterygii,Teleostei,Neoteleostei,Acanthomorphata,Zeiogadaria,Zeariae,Zeiformes,Parazenidae,Parazeninae,Parazen
	Perciformes	Bovichtidae	Bovichtus argentinus	NC_034351.1	Vertebrata,Euteleostomi,Actinopterygii,Neopterygii,Teleostei,Neoteleostei,Acanthomorphata,Zeiogadaria,Zeariae,Zeiformes,Zenionidae,Zenion
	Perciformes	Channichthyidae	Chionobathyscus dewitti	NC_046762.1	Vertebrata,Euteleostomi,Actinopterygii,Neopterygii,Teleostei,Neoteleostei,Myctophata,Myctophiformes,Myctophidae,Benthosema
	Perciformes	Bathydraconidae	Parachaenichthys charcoti	NC_026578.1	Vertebrata,Euteleostomi,Actinopterygii,Neopterygii,Teleostei,Neoteleostei,Myctophata,Myctophiformes,Neoscopelidae,Neoscopelus
	Perciformes	Nototheniidae	Notothenia rossii	MN893242.1	Vertebrata,Euteleostomi,Actinopterygii,Neopterygii,Teleostei,Protacanthopterygii,Salmoniformes,Salmonidae,Salmoninae,Salvelinus
	Perciformes	Eleginopidae	Eleginops maclovinus	NC_033386.1	Vertebrata,Euteleostomi,Actinopterygii,Neopterygii,Teleostei,Protacanthopterygii,Esociformes,Esocidae,Esox
	Perciformes	Trachinidae	Echiichthys vipera	MT410919.1	Vertebrata,Euteleostomi,Actinopterygii,Neopterygii,Teleostei,Protacanthopterygii,Esociformes,Umbridae,Umbra
Actinopterygii	Perciformes	Percidae	Perca fluviatilis	MT410943.1	Vertebrata,Euteleostomi,Actinopterygii,Neopterygii,Teleostei,Stomiatii,Osmeriformes,Salanx
	Perciformes	Hoplichthyidae	Hoplichthys gilberti	NC_034338.1	Vertebrata,Euteleostomi,Actinopterygii,Neopterygii,Teleostei,Stomiatii,Osmeriformes,Protosalanx
	Perciformes	Platycephalidae	Platycephalus sp. 1 JJX-2020	MK344191.1	Vertebrata,Euteleostomi,Actinopterygii,Neopterygii,Teleostei,Stomiatii,Osmeriformes,Neosalanx
	Perciformes	Serranidae	Epinephelus fuscoguttatus x Epinephelus polyphekadion	MT709279.1	Vertebrata,Euteleostomi,Actinopterygii,Neopterygii,Teleostei,Stomiatii,Osmeriformes,Salangichthys
	Percopsiformes	Percopsidae	Percopsis transmontana	NC_003168.1	Vertebrata,Euteleostomi,Actinopterygii,Neopterygii,Teleostei,Stomiatii,Osmeriformes,Hemisalanx
	Percopsiformes	Aphredoderidae	Aphredoderus sayanus	NC_004372.1	Vertebrata,Euteleostomi,Actinopterygii,Neopterygii,Teleostei,Stomiatii,Osmeriformes,Plecoglossus
	Pleuronectiformes	Psettodidae	Psettodes erumei	NC_020032.1	Vertebrata,Euteleostomi,Actinopterygii,Neopterygii,Teleostei,Stomiatii,Osmeriformes,Mallotus
	Pleuronectiformes	Scophthalmidae	Zeugopterus punctatus	MT410862.1	Vertebrata,Euteleostomi,Actinopterygii,Neopterygii,Teleostei,Stomiatii,Osmeriformes,Retropinnidae,Retropinna
	Pleuronectiformes	Rhombosoleidae	Pelotretis flavilatus	NC_026284.1	Vertebrata,Euteleostomi,Actinopterygii,Neopterygii,Teleostei,Stomiatii,Osmeriformes,Osmeridae,Osmerus
	Pleuronectiformes	Soleidae	Pardachirus pavoninus	KJ433565.1	Vertebrata,Euteleostomi,Actinopterygii,Neopterygii,Teleostei,Stomiatii,Stomiiformes,Gonostomatidae,Sigmops
	Pleuronectiformes	Cynoglossidae	Cynoglossus nanhaiensis	NC_050921.1	Vertebrata,Euteleostomi,Actinopterygii,Neopterygii,Teleostei,Stomiatii,Stomiiformes,Sternoptychidae,Sternoptychinae,Sternoptyx
	Pleuronectiformes	Samaridae	Samaris cristatus	NC_025903.1	Vertebrata,Euteleostomi,Actinopterygii,Neopterygii,Teleostei,Stomiatii,Stomiiformes,Diplophidae,Diplophos
	Pleuronectiformes	Achiridae	Trinectes maculatus	NC_023769.1	Vertebrata,Euteleostomi,Actinopterygii,Neopterygii,Teleostei,Stomiatii,Stomiiformes,Stomiidae,Stomias
	Pleuronectiformes	Paralichthyidae	Paralichthys dentatus	NC_029476.1	Vertebrata,Euteleostomi,Actinopterygii,Neopterygii,Teleostei,Ostariophysi,Gymnotiformes,Gymnotoidei,Gymnotidae,Gymnotus
	Pleuronectiformes	Pleuronectidae	Verasper moseri	LC583747.1	Vertebrata,Euteleostomi,Actinopterygii,Neopterygii,Teleostei,Ostariophysi,Gymnotiformes,Sternopygoidei,Apteronotidae,Apteronotus
	Pleuronectiformes	Bothidae	Grammatobothus polyophthalmus	NC_045092.1	Vertebrata,Euteleostomi,Actinopterygii,Neopterygii,Teleostei,Ostariophysi,Gymnotiformes,Sternopygoidei,Hypopomidae,Brachyhypopomus
	Pleuronectiformes	Citharidae	Citharoides macrolepis	KJ433560.1	Vertebrata,Euteleostomi,Actinopterygii,Neopterygii,Teleostei,Ostariophysi,Gymnotiformes,Sternopygoidei,Rhamphichthyidae,Gymnorhamphichthys,unclassifiedGymnorhamphichthys
	Polymixiiformes	Polymixiidae	Polymixia lowei	NC_003181.1	Vertebrata,Euteleostomi,Actinopterygii,Neopterygii,Teleostei,Ostariophysi,Gymnotiformes,Sternopygoidei,Sternopygidae,Sternopygus
	Polypteriformes	Polypteridae	Polypterus mokelembembe	NC_030714.1	Vertebrata,Euteleostomi,Actinopterygii,Neopterygii,Teleostei,Ostariophysi,Siluriformes,Ailiidae,Ailia
	Salmoniformes	Salmonidae	Salvelinus alpinus alpinus	MN957797.1	Vertebrata,Euteleostomi,Actinopterygii,Neopterygii,Teleostei,Ostariophysi,Siluriformes,Schilbidae,Pareutropius
	Scombriformes	Scombropidae	Scombrops gilberti	NC_028550.1	Vertebrata,Euteleostomi,Actinopterygii,Neopterygii,Teleostei,Ostariophysi,Siluriformes,Auchenoglanididae,Auchenoglanis
	Scombriformes	Tetragonuridae	Tetragonurus atlanticus	NC_022500.1	Vertebrata,Euteleostomi,Actinopterygii,Neopterygii,Teleostei,Ostariophysi,Siluriformes,Claroteidae,Chrysichthys
	Scombriformes	Bramidae	Brama dussumieri	MH409959.1	Vertebrata,Euteleostomi,Actinopterygii,Neopterygii,Teleostei,Ostariophysi,Siluriformes,Heteropneustidae,Heteropneustes
	Scombriformes	Chiasmodontidae	Kali indica	NC_022488.1	Vertebrata,Euteleostomi,Actinopterygii,Neopterygii,Teleostei,Ostariophysi,Siluriformes,Aspredinidae,Bunocephalus
	Scombriformes	Ariommatidae	Ariomma indicum	NC_022498.1	Vertebrata,Euteleostomi,Actinopterygii,Neopterygii,Teleostei,Ostariophysi,Siluriformes,Plotosidae,Plotosus
	Scombriformes	Nomeidae	Cubiceps squamiceps	NC_029845.1	Vertebrata,Euteleostomi,Actinopterygii,Neopterygii,Teleostei,Ostariophysi,Siluriformes,Cetopsidae,Helogenes
	Scombriformes	Stromateidae	Pampus cinereus	MH037008.1	Vertebrata,Euteleostomi,Actinopterygii,Neopterygii,Teleostei,Ostariophysi,Siluriformes,Auchenipteridae,Centromochlinae,Tatia
	Scombriformes	Centrolophidae	Schedophilus medusophagus	MT410944.1	Vertebrata,Euteleostomi,Actinopterygii,Neopterygii,Teleostei,Ostariophysi,Siluriformes,Doradidae,Amblydoras
	Scombriformes	Scombridae	Sarda sarda	MT410877.1	Vertebrata,Euteleostomi,Actinopterygii,Neopterygii,Teleostei,Ostariophysi,Siluriformes,Siluridae,Pterocryptis
	Scombriformes	Arripidae	Arripis trutta	NC_015787.1	Vertebrata,Euteleostomi,Actinopterygii,Neopterygii,Teleostei,Ostariophysi,Siluriformes,Malapteruridae,Malapterurus
	Scombriformes	Pomatomidae	Pomatomus saltatrix	NC_022507.1	Vertebrata,Euteleostomi,Actinopterygii,Neopterygii,Teleostei,Ostariophysi,Siluriformes,Mochokidae,Mochokinae,Synodontis
	Scombriformes	Gempylidae	Paradiplospinus antarcticus	MN510443.1	Vertebrata,Euteleostomi,Actinopterygii,Neopterygii,Teleostei,Ostariophysi,Siluriformes,Amblycipitidae,Liobagrus
	Scombriformes	Trichiuridae	Trichiurus haumela	NC_042168.1	Vertebrata,Euteleostomi,Actinopterygii,Neopterygii,Teleostei,Ostariophysi,Siluriformes,Sisoridae,Glyptosterninae,Pseudecheneis
	Semionotiformes	Lepisosteidae	Atractosteus tristoechus	NC_036329.1	Vertebrata,Euteleostomi,Actinopterygii,Neopterygii,Teleostei,Ostariophysi,Siluriformes,Bagridae,Hemibagrus
	Siluriformes	Ailiidae	Ailia coila	NC_046497.1	Vertebrata,Euteleostomi,Actinopterygii,Neopterygii,Teleostei,Ostariophysi,Siluriformes,Ariidae,Arius
	Siluriformes	Schilbidae	Pareutropius debauwi	NC_015837.1	Vertebrata,Euteleostomi,Actinopterygii,Neopterygii,Teleostei,Ostariophysi,Siluriformes,Clariidae,Clarias
	Siluriformes	Auchenoglanididae	Auchenoglanis occidentalis	MF124303.1	Vertebrata,Euteleostomi,Actinopterygii,Neopterygii,Teleostei,Ostariophysi,Siluriformes,Pangasiidae,Pangasius
	Siluriformes	Claroteidae	Chrysichthys nigrodigitatus	NC_042721.1	Vertebrata,Euteleostomi,Actinopterygii,Neopterygii,Teleostei,Ostariophysi,Siluriformes,Ictaluridae,Ameiurus
	Siluriformes	Heteropneustidae	Heteropneustes fossilis	KP345880.1	Vertebrata,Euteleostomi,Actinopterygii,Neopterygii,Teleostei,Ostariophysi,Siluriformes,Cranoglanididae,Cranoglanis
	Siluriformes	Aspredinidae	Bunocephalus coracoideus	NC_015811.1	Vertebrata,Euteleostomi,Actinopterygii,Neopterygii,Teleostei,Ostariophysi,Siluriformes,Pimelodidae,Phractocephalus
	Siluriformes	Plotosidae	Plotosus lineatus	NC_029714.1	Vertebrata,Euteleostomi,Actinopterygii,Neopterygii,Teleostei,Ostariophysi,Siluriformes,Pseudopimelodidae,Lophiosilurus
	Siluriformes	Cetopsidae	Helogenes marmoratus	AP012014.1	Vertebrata,Euteleostomi,Actinopterygii,Neopterygii,Teleostei,Ostariophysi,Siluriformes,Chacidae,Chaca
	Siluriformes	Auchenipteridae	Tatia intermedia	MK078120.1	Vertebrata,Euteleostomi,Actinopterygii,Neopterygii,Teleostei,Ostariophysi,Siluriformes,Amphiliidae,Amphiliinae,Amphilius,unclassifiedAmphilius
	Siluriformes	Doradidae	Amblydoras gonzalezi	NC_015745.1	Vertebrata,Euteleostomi,Actinopterygii,Neopterygii,Teleostei,Ostariophysi,Siluriformes,Diplomystidae,Diplomystes
	Siluriformes	Siluridae	Pterocryptis anomala	MT433099.1	Vertebrata,Euteleostomi,Actinopterygii,Neopterygii,Teleostei,Ostariophysi,Siluriformes,Trichomycteridae,Trichomycterus
	Siluriformes	Malapteruridae	Malapterurus electricus	NC_015833.1	Vertebrata,Euteleostomi,Actinopterygii,Neopterygii,Teleostei,Ostariophysi,Siluriformes,Astroblepidae,Astroblepus
	Siluriformes	Mochokidae	Synodontis schoutedeni	NC_015808.1	Vertebrata,Euteleostomi,Actinopterygii,Neopterygii,Teleostei,Ostariophysi,Siluriformes,Callichthyidae,Corydoras
	Siluriformes	Amblycipitidae	Liobagrus somjinensis	MN756661.1	Vertebrata,Euteleostomi,Actinopterygii,Neopterygii,Teleostei,Ostariophysi,Siluriformes,Loricariidae,Hypostominae,Hypostomus
	Siluriformes	Sisoridae	Pseudecheneis sulcata	MK843301.1	Vertebrata,Euteleostomi,Actinopterygii,Neopterygii,Teleostei,Ostariophysi,Characiformes,Characoidei,Characidae,Hyphessobrycon
	Siluriformes	Bagridae	Hemibagrus nemurus	NC_044863.1	Vertebrata,Euteleostomi,Actinopterygii,Neopterygii,Teleostei,Ostariophysi,Characiformes,Citharinoidei,Distichodontidae,Distichodus
	Siluriformes	Ariidae	Arius dispar	NC_048969.1	Vertebrata,Euteleostomi,Actinopterygii,Neopterygii,Teleostei,Ostariophysi,Characiformes,Citharinoidei,Citharinidae,Ichthyboriinae,Ichthyborus,unclassifiedIchthyborus
	Siluriformes	Clariidae	Clarias macrocephalus	NC_046749.1	Vertebrata,Euteleostomi,Actinopterygii,Neopterygii,Teleostei,Ostariophysi,Characiformes,Characoidei,Crenuchidae,Crenuchus
	Siluriformes	Pangasiidae	Pangasius bocourti	NC_046590.1	Vertebrata,Euteleostomi,Actinopterygii,Neopterygii,Teleostei,Ostariophysi,Characiformes,Characoidei,Acestrorhynchidae,Acestrorhynchus,unclassifiedAcestrorhynchus
	Siluriformes	Ictaluridae	Ameiurus catus	MH324425.1	Vertebrata,Euteleostomi,Actinopterygii,Neopterygii,Teleostei,Ostariophysi,Characiformes,Characoidei,Gasteropelecidae,Carnegiella
	Siluriformes	Cranoglanididae	Cranoglanis bouderius	AY898626.1	Vertebrata,Euteleostomi,Actinopterygii,Neopterygii,Teleostei,Ostariophysi,Characiformes,Characoidei,Hemiodontidae,Hemiodopsis
	Siluriformes	Pimelodidae	Phractocephalus hemioliopterus	NC_037886.1	Vertebrata,Euteleostomi,Actinopterygii,Neopterygii,Teleostei,Ostariophysi,Characiformes,Characoidei,Chalceidae,Chalceus
	Siluriformes	Pseudopimelodidae	Lophiosilurus alexandri	KT990219.1	Vertebrata,Euteleostomi,Actinopterygii,Neopterygii,Teleostei,Ostariophysi,Characiformes,Characoidei,Lebiasinidae,Lebiasininae,Lebiasina
	Siluriformes	Chacidae	Chaca bankanensis	AP012008.1	Vertebrata,Euteleostomi,Actinopterygii,Neopterygii,Teleostei,Ostariophysi,Characiformes,Characoidei,Ctenoluciidae,Ctenolucius
	Siluriformes	Amphiliidae	Amphilius sp. NM-2010	NC_015746.1	Vertebrata,Euteleostomi,Actinopterygii,Neopterygii,Teleostei,Ostariophysi,Characiformes,Characoidei,Erythrinidae,Hoplias
	Siluriformes	Diplomystidae	Diplomystes nahuelbutaensis	NC_015823.1	Vertebrata,Euteleostomi,Actinopterygii,Neopterygii,Teleostei,Ostariophysi,Characiformes,Characoidei,Characidae,Hyphessobrycon
	Siluriformes	Trichomycteridae	Trichomycterus areolatus	AP012026.1	Vertebrata,Euteleostomi,Actinopterygii,Neopterygii,Teleostei,Ostariophysi,Characiformes,Characoidei,Hepsetidae,Hepsetus
	Siluriformes	Astroblepidae	Astroblepus sp. NM-2010	AP012004.1	Vertebrata,Euteleostomi,Actinopterygii,Neopterygii,Teleostei,Ostariophysi,Characiformes,Characoidei,Anostomidae,Megaleporinus
	Siluriformes	Callichthyidae	Corydoras trilineatus	NC_049098.1	Vertebrata,Euteleostomi,Actinopterygii,Neopterygii,Teleostei,Ostariophysi,Characiformes,Characoidei,Alestidae,Micralestes,unclassifiedMicralestes
	Siluriformes	Loricariidae	Hypostomus ancistroides	MT066232.1	Vertebrata,Euteleostomi,Actinopterygii,Neopterygii,Teleostei,Ostariophysi,Characiformes,Characoidei,Curimatidae,Curimata
	Spariformes	Sparidae	Dentex hypselosomus	NC_049151.1	Vertebrata,Euteleostomi,Actinopterygii,Neopterygii,Teleostei,Ostariophysi,Cypriniformes,Tanichthyidae,Tanichthys
	Spariformes	Centracanthidae	Spicara maena	NC_009854.1	Vertebrata,Euteleostomi,Actinopterygii,Neopterygii,Teleostei,Ostariophysi,Cypriniformes,Cyprinoideiintergenerichybrids
	Spariformes	Lethrinidae	Monotaxis grandoculis	NC_010957.1	Vertebrata,Euteleostomi,Actinopterygii,Neopterygii,Teleostei,Ostariophysi,Cypriniformes,Leptobarbidae,Leptobarbus
	Spariformes	Nemipteridae	Nemipterus hexodon	NC_049150.1	Vertebrata,Euteleostomi,Actinopterygii,Neopterygii,Teleostei,Ostariophysi,Cypriniformes,Gastromyzontidae,Erromyzon
	Stomiiformes	Gonostomatidae	Sigmops gracilis	NC_002574.1	Vertebrata,Euteleostomi,Actinopterygii,Neopterygii,Teleostei,Ostariophysi,Cypriniformes,Botiidae,Yasuhikotakia
	Stomiiformes	Sternoptychidae	Sternoptyx diaphana	MT588184.1	Vertebrata,Euteleostomi,Actinopterygii,Neopterygii,Teleostei,Ostariophysi,Cypriniformes,Acheilognathidae,Acheilognathus
Actinopterygii	Stomiiformes	Diplophidae	Diplophos taenia	NC_002647.1	Vertebrata,Euteleostomi,Actinopterygii,Neopterygii,Teleostei,Ostariophysi,Cypriniformes,Xenocyprididae,Xenocypridinae,Megalobrama
	Stomiiformes	Stomiidae	Stomias atriventer	NC_037248.1	Vertebrata,Euteleostomi,Actinopterygii,Neopterygii,Teleostei,Ostariophysi,Cypriniformes,Leuciscidae,Leuciscinae,Blicca
	Stylephoriformes	Stylephoridae	Stylephorus chordatus	NC_009948.1	Vertebrata,Euteleostomi,Actinopterygii,Neopterygii,Teleostei,Ostariophysi,Cypriniformes,Tincidae,Tinca
	Synbranchiformes	Mastacembelidae	Mastacembelus erythrotaenia	NC_035141.1	Vertebrata,Euteleostomi,Actinopterygii,Neopterygii,Teleostei,Ostariophysi,Cypriniformes,Gobionidae,Hemibarbus-Squalidusclade,Squalidus
	Synbranchiformes	Indostomidae	Indostomus paradoxus	NC_004401.1	Vertebrata,Euteleostomi,Actinopterygii,Neopterygii,Teleostei,Ostariophysi,Cypriniformes,Serpenticobitidae,Serpenticobitis
	Synbranchiformes	Synbranchidae	Monopterus albus	KP779625.1	Vertebrata,Euteleostomi,Actinopterygii,Neopterygii,Teleostei,Ostariophysi,Cypriniformes,Paedocyprididae,Paedocypris
	Syngnathiformes	Draconettidae	Draconetta xenica	NC_024185.1	Vertebrata,Euteleostomi,Actinopterygii,Neopterygii,Teleostei,Ostariophysi,Cypriniformes,Danionidae,Chedrinae,Barilius
	Syngnathiformes	Fistulariidae	Fistularia petimba	NC_024190.1	Vertebrata,Euteleostomi,Actinopterygii,Neopterygii,Teleostei,Ostariophysi,Cypriniformes,Barbuccidae,Barbucca
	Syngnathiformes	Aulostomidae	Aulostomus chinensis	NC_010269.1	Vertebrata,Euteleostomi,Actinopterygii,Neopterygii,Teleostei,Ostariophysi,Cypriniformes,Psilorhynchidae,Psilorhynchus
	Syngnathiformes	Centriscidae	Aeoliscus strigatus	NC_010270.1	Vertebrata,Euteleostomi,Actinopterygii,Neopterygii,Teleostei,Ostariophysi,Cypriniformes,Vaillantellidae,Vaillantella
	Syngnathiformes	Syngnathidae	Trachyrhamphus serratus	MK680823.1	Vertebrata,Euteleostomi,Actinopterygii,Neopterygii,Teleostei,Ostariophysi,Cypriniformes,Gyrinocheiloidei,Gyrinocheilidae,Gyrinocheilus
	Syngnathiformes	Solenostomidae	Solenostomus paradoxus	NC_024186.1	Vertebrata,Euteleostomi,Actinopterygii,Neopterygii,Teleostei,Ostariophysi,Cypriniformes,Nemacheilidae,Triplophysa
	Syngnathiformes	Pegasidae	Pegasus volitans	NC_010271.1	Vertebrata,Euteleostomi,Actinopterygii,Neopterygii,Teleostei,Ostariophysi,Cypriniformes,Ellopostomatidae,Ellopostoma
	Syngnathiformes	Dactylopteridae	Dactyloptena orientalis	NC_024189.1	Vertebrata,Euteleostomi,Actinopterygii,Neopterygii,Teleostei,Ostariophysi,Cypriniformes,Cobitidae,Cobitinae,Cobitis
	Syngnathiformes	Callionymidae	Synchiropus sycorax	NC_047299.1	Vertebrata,Euteleostomi,Actinopterygii,Neopterygii,Teleostei,Ostariophysi,Cypriniformes,Balitoridae,Balitora
	Syngnathiformes	Mullidae	Mullus surmuletus	MT410885.1	Vertebrata,Euteleostomi,Actinopterygii,Neopterygii,Teleostei,Ostariophysi,Cypriniformes,Catostomoidei,Catostomidae,Catostomus
	Tetraodontiformes	Triacanthodidae	Macrorhamphosodes uradoi	NC_009860.1	Vertebrata,Euteleostomi,Actinopterygii,Neopterygii,Teleostei,Ostariophysi,Cypriniformes,Cyprinidae,Torinae,Neolissochilus
	Tetraodontiformes	Triacanthidae	Triacanthus biaculeatus	NC_009863.1	Vertebrata,Euteleostomi,Actinopterygii,Neopterygii,Teleostei,Ostariophysi,Gonorynchiformes,Gonorynchidae,Gonorynchus
	Tetraodontiformes	Balistidae	Abalistes stellaris	MG515171.1	Vertebrata,Euteleostomi,Actinopterygii,Neopterygii,Teleostei,Ostariophysi,Gonorynchiformes,Chanidae,Chanos
	Tetraodontiformes	Monacanthidae	Thamnaconus hypargyreus	MG739437.1	Vertebrata,Euteleostomi,Actinopterygii,Neopterygii,Teleostei,Ostariophysi,Gonorynchiformes,Kneriidae,Kneriinae,Parakneria
	Tetraodontiformes	Molidae	Ranzania laevis	NC_007887.1	Vertebrata,Euteleostomi,Actinopterygii,Neopterygii,Teleostei,Alepocephali,Alepocephaliformes,Leptochilichthyidae,Leptochilichthys
	Tetraodontiformes	Triodontidae	Triodon macropterus	NC_009859.1	Vertebrata,Euteleostomi,Actinopterygii,Neopterygii,Teleostei,Alepocephali,Alepocephaliformes,Platytroctidae,Platytroctes
	Tetraodontiformes	Diodontidae	Diodon liturosus	NC_034658.1	Vertebrata,Euteleostomi,Actinopterygii,Neopterygii,Teleostei,Alepocephali,Alepocephaliformes,Alepocephalidae,Leptoderma
	Tetraodontiformes	Tetraodontidae	Tetraodon lineatus	MG913990.1	Vertebrata,Euteleostomi,Actinopterygii,Neopterygii,Teleostei,Clupei,Clupeiformes,Clupeoidei,Pristigasteridae,Ilisha
	Tetraodontiformes	Aracanidae	Anoplocapros lenticularis	NC_011319.1	Vertebrata,Euteleostomi,Actinopterygii,Neopterygii,Teleostei,Clupei,Clupeiformes,Clupeoidei,Pristigasteridae,Ilisha
	Tetraodontiformes	Ostraciidae	Ostracion rhinorhynchos	NC_030005.1	Vertebrata,Euteleostomi,Actinopterygii,Neopterygii,Teleostei,Clupei,Clupeiformes,Clupeoidei,Chirocentridae,Chirocentrus
	Trachichthyiformes	Monocentridae	Monocentris japonicus	NC_004392.1	Vertebrata,Euteleostomi,Actinopterygii,Neopterygii,Teleostei,Clupei,Clupeiformes,Clupeoidei,Clupeidae,Konosirus
	Trachichthyiformes	Anomalopidae	Anomalops katoptron	NC_008128.1	Vertebrata,Euteleostomi,Actinopterygii,Neopterygii,Teleostei,Clupei,Clupeiformes,Clupeoidei,Engraulidae,Engraulinae,Engraulis
	Trachichthyiformes	Trachichthyidae	Hoplostethus japonicus	NC_003187.1	Vertebrata,Euteleostomi,Actinopterygii,Neopterygii,Teleostei,Clupei,Clupeiformes,Denticipitoidei,Denticipitidae,Denticeps
	Trachichthyiformes	Diretmidae	Diretmoides veriginae	NC_008126.1	Vertebrata,Euteleostomi,Actinopterygii,Neopterygii,Teleostei,Neoteleostei,Acanthomorphata,Batrachoidaria,Batrachoididae,Porichthys
	Trachichthyiformes	Anoplogasteridae	Anoplogaster cornuta	NC_004391.1	Vertebrata,Euteleostomi,Actinopterygii,Neopterygii,Teleostei,Protacanthopterygii,Galaxiidae,Lovettia
	Uranoscopiformes	Uranoscopidae	Uranoscopus cognatus	NC_043875.1	Vertebrata,Euteleostomi,Actinopterygii,Neopterygii,Teleostei,Neoteleostei,Acanthomorphata,Berycimorphaceae,Trachichthyiformes,Monocentridae,Monocentris
	Uranoscopiformes	Ammodytidae	Gymnammodytes semisquamatus	MT410950.1	Vertebrata,Euteleostomi,Actinopterygii,Neopterygii,Teleostei,Neoteleostei,Acanthomorphata,Berycimorphaceae,Trachichthyiformes,Anomalopidae,Anomalops
	Zeiformes	Oreosomatidae	Neocyttus rhomboidalis	NC_004399.1	Vertebrata,Euteleostomi,Actinopterygii,Neopterygii,Teleostei,Neoteleostei,Acanthomorphata,Berycimorphaceae,Trachichthyiformes,Trachichthyidae,Hoplostethus
	Zeiformes	Zeidae	Zeus faber	MT410863.1	Vertebrata,Euteleostomi,Actinopterygii,Neopterygii,Teleostei,Neoteleostei,Acanthomorphata,Berycimorphaceae,Trachichthyiformes,Diretmidae,Diretmoides
	Zeiformes	Parazenidae	Parazen pacificus	NC_004396.1	Vertebrata,Euteleostomi,Actinopterygii,Neopterygii,Teleostei,Neoteleostei,Acanthomorphata,Berycimorphaceae,Trachichthyiformes,Anoplogasteridae,Anoplogaster
	Zeiformes	Zenionidae	Zenion japonicum	NC_004397.1	Vertebrata,Euteleostomi,Actinopterygii,Neopterygii,Teleostei,Neoteleostei,Acanthomorphata,Eupercaria,Caproiformes,Caproidae,Capros
	Coelacanthiformes	Coelacanthidae	Latimeria menadoensis	GQ911586.1	Vertebrata,Euteleostomi,Coelacanthiformes,Coelacanthidae,Latimeria
Dipnoi	Ceratodontiformes	Ceratodontidae	Neoceratodus forsteri	MF489951.1	Vertebrata,Euteleostomi,Dipnoi,Ceratodontiformes,Ceratodontidae,Neoceratodus
	Lepidosireniformes	Protopteridae	Protopterus aethiopicus	NC_014764.2	Vertebrata,Euteleostomi,Dipnoi,Lepidosireniformes,Protopteridae,Protopterus
	Lepidosireniformes	Lepidosirenidae	Lepidosiren paradoxa	AF302934.1	Vertebrata,Euteleostomi,Dipnoi,Lepidosireniformes,Lepidosirenidae,Lepidosiren
Amphibia	Anura	Limnodynastidae	Lechriodus melanopyga	NC_019999.1	Vertebrata,Euteleostomi,Amphibia,Batrachia,Caudata,Cryptobranchoidea,Cryptobranchidae,Andrias
	Anura	Pelodytidae	Pelodytes cf. punctatus II-2011	NC_020000.1	Vertebrata,Euteleostomi,Amphibia,Batrachia,Caudata,Cryptobranchoidea,Hynobiidae,Pachyhynobius
	Anura	Mantella	Mantella baroni	NC_039758.1	Vertebrata,Euteleostomi,Amphibia,Batrachia,Caudata,Salamandroidea,Rhyacotritonidae,Rhyacotriton
	Anura	Megophryidae	Oreolalax omeimontis	NC_049862.1	Vertebrata,Euteleostomi,Amphibia,Batrachia,Caudata,Salamandroidea,Amphiumidae,Amphiuma
	Anura	Leiopelmatidae	Leiopelma archeyi	HM142901.1	Vertebrata,Euteleostomi,Amphibia,Batrachia,Caudata,Salamandroidea,Plethodontidae,Plethodontinae,Karsenia
	Anura	Pelobatidae	Pelobates fuscus	MT410942.1	Vertebrata,Euteleostomi,Amphibia,Batrachia,Caudata,Salamandroidea,Proteidae,Proteus
	Anura	Microhylidae	Microhyla fissipes	MH822625.1	Vertebrata,Euteleostomi,Amphibia,Batrachia,Caudata,Salamandroidea,Ambystomatidae,Ambystoma
	Anura	Hyperoliidae	Hyperolius marmoratus	NC_023381.1	Vertebrata,Euteleostomi,Amphibia,Batrachia,Caudata,Salamandroidea,Dicamptodontidae,Dicamptodon
	Anura	Hemisotidae	Hemisus marmoratus	NC_023380.1	Vertebrata,Euteleostomi,Amphibia,Batrachia,Caudata,Salamandroidea,Salamandridae,Pleurodelinae,Pachytriton
	Anura	Pyxicephalidae	Pyxicephalus adspersus	NC_044480.1	Vertebrata,Euteleostomi,Amphibia,Batrachia,Caudata,Sirenoidea,Sirenidae,Siren
	Anura	Ranidae	Odorrana graminea	NC_050884.1	Vertebrata,Euteleostomi,Amphibia,Batrachia,Anura,Neobatrachia,Myobatrachoidea,Limnodynastidae,Lechriodus
	Anura	Ceratobatrachidae	Cornufer vitianus	NC_027671.1	Vertebrata,Euteleostomi,Amphibia,Batrachia,Anura,Pelobatoidea,Pelodytidae,Pelodytes
	Anura	Rhacophoridae	Zhangixalus omeimontis	MN427892.1	Vertebrata,Euteleostomi,Amphibia,Batrachia,Anura,Neobatrachia,Ranoidea,Mantellinae,Mantella,cowanigroup
	Anura	Dicroglossidae	Quasipaa boulengeri	KY441640.1	Vertebrata,Euteleostomi,Amphibia,Batrachia,Anura,Pelobatoidea,Megophryidae,Oreolalax
	Anura	Sooglossidae	Sooglossus thomasseti	NC_020001.1	Vertebrata,Euteleostomi,Amphibia,Batrachia,Anura,Leiopelmatidae,Leiopelma
	Anura	Calyptocephalellidae	Telmatobufo australis	NC_027274.1	Vertebrata,Euteleostomi,Amphibia,Batrachia,Anura,Pelobatoidea,Pelobatidae,Pelobates
	Anura	Heleophrynidae	Heleophryne regis	NC_019998.1	Vertebrata,Euteleostomi,Amphibia,Batrachia,Anura,Neobatrachia,Microhyloidea,Microhylidae,Microhylinae,Microhyla
	Anura	Dendrobatidae	Anomaloglossus baeobatrachus	MK069979.1	Vertebrata,Euteleostomi,Amphibia,Batrachia,Anura,Neobatrachia,Microhyloidea,Hyperoliidae,Hyperolius
	Anura	Bufonidae	Bufotes sitibundus	NC_050665.1	Vertebrata,Euteleostomi,Amphibia,Batrachia,Anura,Neobatrachia,Microhyloidea,Hemisotidae,Hemisus
	Anura	Ceratophryidae	Telmatobius chusmisensis	NC_030333.1	Vertebrata,Euteleostomi,Amphibia,Batrachia,Anura,Neobatrachia,Ranoidea,Pyxicephalidae,Pyxicephalinae,Pyxicephalus
	Anura	Hylidae	Dryophytes versicolor	MH087467.1	Vertebrata,Euteleostomi,Amphibia,Batrachia,Anura,Neobatrachia,Ranoidea,Ranidae,Odorrana
	Anura	Rhinophrynidae	Rhinophrynus dorsalis	HM991334.1	Vertebrata,Euteleostomi,Amphibia,Batrachia,Anura,Neobatrachia,Ranoidea,Ceratobatrachidae,Ceratobatrachinae,Cornufer
	Anura	Pipidae	Xenopus fischbergi	NC_044888.1	Vertebrata,Euteleostomi,Amphibia,Batrachia,Anura,Neobatrachia,Ranoidea,Rhacophoridae,Rhacophorinae,Zhangixalus
	Anura	Bombinatoridae	Bombina bombina	NC_042501.1	Vertebrata,Euteleostomi,Amphibia,Batrachia,Anura,Neobatrachia,Ranoidea,Dicroglossidae,Dicroglossinae,Quasipaa
	Anura	Alytidae	Discoglossus galganoi	AY585339.1	Vertebrata,Euteleostomi,Amphibia,Batrachia,Anura,Neobatrachia,Sooglossoidea,Sooglossidae,Sooglossus
	Caudata	Cryptobranchidae	Andrias davidianus	KU131061.1	Vertebrata,Euteleostomi,Amphibia,Batrachia,Anura,Neobatrachia,Myobatrachoidea,Calyptocephalellidae,Telmatobufo
	Caudata	Hynobiidae	Pachyhynobius shangchengensis	MK890400.1	Vertebrata,Euteleostomi,Amphibia,Batrachia,Anura,Neobatrachia,Hyloidea,Heleophrynidae,Heleophryne
	Caudata	Rhyacotritonidae	Rhyacotriton variegatus	AY728219.1	Vertebrata,Euteleostomi,Amphibia,Batrachia,Anura,Neobatrachia,Hyloidea,Dendrobatidae,Aromobatinae,Anomaloglossus
	Caudata	Amphiumidae	Amphiuma means	GQ368656.1	Vertebrata,Euteleostomi,Amphibia,Batrachia,Anura,Neobatrachia,Hyloidea,Bufonidae,Bufotes
Amphibia	Caudata	Plethodontidae	Karsenia koreana	MK512368.1	Vertebrata,Euteleostomi,Amphibia,Batrachia,Anura,Neobatrachia,Hyloidea,Ceratophryidae,Telmatobiinae,Telmatobius
	Caudata	Proteidae	Proteus anguinus	GQ368659.1	Vertebrata,Euteleostomi,Amphibia,Batrachia,Anura,Neobatrachia,Hyloidea,Hylidae,Hylinae,Hylini,Dryophytes
	Caudata	Ambystomatidae	Ambystoma talpoideum	NC_039182.1	Vertebrata,Euteleostomi,Amphibia,Batrachia,Anura,Pipoidea,Rhinophrynidae,Rhinophrynus
	Caudata	Dicamptodontidae	Dicamptodon aterrimus	GQ368657.1	Vertebrata,Euteleostomi,Amphibia,Batrachia,Anura,Pipoidea,Pipidae,Xenopodinae,Xenopus,Xenopus
	Caudata	Salamandridae	Pachytriton brevipes	MW004669.1	Vertebrata,Euteleostomi,Amphibia,Batrachia,Anura,Bombinatoridae,Bombina
	Caudata	Sirenidae	Siren intermedia	MH888024.1	Vertebrata,Euteleostomi,Amphibia,Batrachia,Anura,Alytidae,Discoglossinae,Discoglossus
	Gymnophiona	Chikilidae	Chikila fulleri	NC_021369.1	Vertebrata,Euteleostomi,Amphibia,Gymnophiona,Chikilidae
	Gymnophiona	Rhinatrematidae	Rhinatrema bivittatum	AY456252.1	Vertebrata,Euteleostomi,Amphibia,Gymnophiona,Rhinatrematidae,Rhinatrema
	Gymnophiona	Herpelidae	Boulengerula taitana	AY954504.1	Vertebrata,Euteleostomi,Amphibia,Gymnophiona,Herpelidae,Boulengerula
	Gymnophiona	Indotyphlidae	Gegeneophis ramaswamii	AY456250.1	Vertebrata,Euteleostomi,Amphibia,Gymnophiona,Indotyphlidae,Gegeneophis
	Gymnophiona	Siphonopidae	Siphonops annulatus	AY954506.1	Vertebrata,Euteleostomi,Amphibia,Gymnophiona,Siphonopidae,Siphonops
	Gymnophiona	Typhlonectidae	Typhlonectes natans	AF154051.1	Vertebrata,Euteleostomi,Amphibia,Gymnophiona,Typhlonectidae,Typhlonectes
	Gymnophiona	Caeciliidae	Oscaecilia ochrocephala	GQ244474.1	Vertebrata,Euteleostomi,Amphibia,Gymnophiona,Caeciliidae,Oscaecilia
	Gymnophiona	Scolecomorphidae	Scolecomorphus vittatus	AY456253.1	Vertebrata,Euteleostomi,Amphibia,Gymnophiona,Scolecomorphidae,Scolecomorphus
	Gymnophiona	Ichthyophiidae	Ichthyophis bannanicus	AY458594.1	Vertebrata,Euteleostomi,Amphibia,Gymnophiona,Ichthyophiidae,Ichthyophis
Reptilia	Crocodylia	Crocodylidae	Crocodylus palustris	MT554049.1	Vertebrata,Euteleostomi,Lepidosauria,Squamata,Bifurcata,Unidentata,Episquamata,Laterata,Lacertibaenia,Amphisbaenia,Trogonophidae,Diplometopon
	Crocodylia	Gavialidae	Tomistoma schlegelii	MT554040.1	Vertebrata,Euteleostomi,Lepidosauria,Squamata,Bifurcata,Unidentata,Episquamata,Toxicofera,Iguania,Dactyloidae,Anolis
	Crocodylia	Alligatoridae	Caiman latirostris	MT554051.1	Vertebrata,Euteleostomi,Lepidosauria,Squamata,Bifurcata,Unidentata,Episquamata,Toxicofera,Iguania,Polychrotidae,Polychrus
	Sphenodontia	Sphenodontidae	Sphenodon punctatus	MN864228.1	Vertebrata,Euteleostomi,Lepidosauria,Squamata,Bifurcata,Unidentata,Episquamata,Toxicofera,Iguania,Phrynosomatidae,Phrynosomatinae,Sceloporus
	Squamata	Trogonophidae	Diplometopon zarudnyi	AY605474.1	Vertebrata,Euteleostomi,Lepidosauria,Squamata,Bifurcata,Unidentata,Episquamata,Toxicofera,Serpentes,Typhlopoidea,Typhlopidae,Xerotyphlops
	Squamata	Dactyloidae	Anolis punctatus	NC_044125.1	Vertebrata,Euteleostomi,Lepidosauria,Squamata,Bifurcata,Unidentata,Episquamata,Toxicofera,Serpentes,Typhlopoidea,Leptotyphlopidae,Rena
	Squamata	Polychrotidae	Polychrus marmoratus	NC_012839.1	Vertebrata,Euteleostomi,Lepidosauria,Squamata,Bifurcata,Unidentata,Episquamata,Toxicofera,Serpentes,Colubroidea,Xenodermatidae,Achalinus
	Squamata	Phrynosomatidae	Sceloporus woodi	BK010487.1	Vertebrata,Euteleostomi,Lepidosauria,Squamata,Bifurcata,Unidentata,Episquamata,Toxicofera,Serpentes,Colubroidea,Hydrophiidae,Hydrophis
	Squamata	Typhlopidae	Xerotyphlops vermicularis	NC_044967.1	Vertebrata,Euteleostomi,Lepidosauria,Squamata,Bifurcata,Unidentata,Episquamata,Toxicofera,Serpentes,Colubroidea,Elapidae,Elapinae,Micrurus
	Squamata	Leptotyphlopidae	Rena humilis	NC_005961.1	Vertebrata,Euteleostomi,Lepidosauria,Squamata,Bifurcata,Unidentata,Episquamata,Toxicofera,Serpentes,Colubroidea,Colubridae,Colubrinae,Oligodon
	Squamata	Xenodermatidae	Achalinus rufescens	NC_032085.1	Vertebrata,Euteleostomi,Lepidosauria,Squamata,Bifurcata,Unidentata,Episquamata,Toxicofera,Serpentes,Colubroidea,Dipsadidae,Hypsiglena
	Squamata	Hydrophiidae	Hydrophis cyanocinctus	NC_046795.1	Vertebrata,Euteleostomi,Lepidosauria,Squamata,Bifurcata,Unidentata,Episquamata,Toxicofera,Serpentes,Colubroidea,Homalopsidae,Hypsiscopus
	Squamata	Elapidae	Laticauda semifasciata	NC_036055.1	Vertebrata,Euteleostomi,Lepidosauria,Squamata,Bifurcata,Unidentata,Episquamata,Toxicofera,Serpentes,Colubroidea,Viperidae,Crotalinae,Bothrops
	Squamata	Colubridae	Oligodon chinensis	MK347418.1	Vertebrata,Euteleostomi,Lepidosauria,Squamata,Bifurcata,Unidentata,Episquamata,Toxicofera,Serpentes,Colubroidea,Pareatidae,Pareas
	Squamata	Dipsadidae	Hypsiglena jani jani	MT561500.1	Vertebrata,Euteleostomi,Lepidosauria,Squamata,Bifurcata,Unidentata,Episquamata,Toxicofera,Serpentes,Acrochordoidea,Acrochordidae,Acrochordus
	Squamata	Homalopsidae	Hypsiscopus plumbea	NC_010200.1	Vertebrata,Euteleostomi,Lepidosauria,Squamata,Bifurcata,Unidentata,Episquamata,Toxicofera,Serpentes,Henophidia,Pythonidae,Malayopython
	Squamata	Viperidae	Bothrops pubescens	MN379927.1	Vertebrata,Euteleostomi,Lepidosauria,Squamata,Bifurcata,Unidentata,Episquamata,Toxicofera,Serpentes,Henophidia,Xenopeltidae,Xenopeltis
	Squamata	Pareatidae	Pareas boulengeri	NC_050894.1	Vertebrata,Euteleostomi,Lepidosauria,Squamata,Bifurcata,Unidentata,Episquamata,Toxicofera,Serpentes,Henophidia,Cylindrophiidae,Cylindrophis
	Squamata	Acrochordidae	Acrochordus granulatus	NC_007400.1	Vertebrata,Euteleostomi,Lepidosauria,Squamata,Bifurcata,Unidentata,Episquamata,Toxicofera,Serpentes,Henophidia,Boidae,Erycinae,Eryx
	Squamata	Pythonidae	Malayopython reticulatus	NC_042397.1	Vertebrata,Euteleostomi,Lepidosauria,Squamata,Bifurcata,Unidentata,Episquamata,Toxicofera,Serpentes,Henophidia,Aniliidae,Anilius
	Squamata	Xenopeltidae	Xenopeltis unicolor	NC_007402.1	Vertebrata,Euteleostomi,Lepidosauria,Squamata,Bifurcata,Unidentata,Episquamata,Toxicofera,Serpentes,Henophidia,Tropidophiidae,Tropidophis
	Squamata	Cylindrophiidae	Cylindrophis ruffus	NC_007401.1	Vertebrata,Euteleostomi,Lepidosauria,Squamata,Bifurcata,Unidentata,Episquamata,Toxicofera,Iguania,Iguanidae,Iguaninae,Iguana
	Squamata	Boidae	Eryx tataricus	MN646174.1	Vertebrata,Euteleostomi,Lepidosauria,Squamata,Bifurcata,Unidentata,Episquamata,Toxicofera,Iguania,Acrodonta,Agamidae,Draconinae,Calotes
	Squamata	Aniliidae	Anilius scytale	FJ755180.1	Vertebrata,Euteleostomi,Lepidosauria,Squamata,Bifurcata,Unidentata,Episquamata,Toxicofera,Iguania,Acrodonta,Chamaeleonidae,Chamaeleo
	Squamata	Tropidophiidae	Tropidophis haetianus	FJ755181.1	Vertebrata,Euteleostomi,Lepidosauria,Squamata,Bifurcata,Unidentata,Episquamata,Toxicofera,Anguimorpha,Neoanguimorpha,Helodermatidae,Heloderma
	Squamata	Iguanidae	Iguana delicatissima	NC_044899.1	Vertebrata,Euteleostomi,Lepidosauria,Squamata,Bifurcata,Unidentata,Episquamata,Toxicofera,Anguimorpha,Neoanguimorpha,Anguioidea,Anguidae,Anguis
	Squamata	Agamidae	Draco maculatus	NC_047179.1	Vertebrata,Euteleostomi,Lepidosauria,Squamata,Bifurcata,Unidentata,Episquamata,Toxicofera,Anguimorpha,Paleoanguimorpha,Varanoidea,Varanidae,Varanus
	Squamata	Chamaeleonidae	Brookesia decaryi	NC_014174.1	Vertebrata,Euteleostomi,Lepidosauria,Squamata,Bifurcata,Unidentata,Episquamata,Toxicofera,Anguimorpha,Paleoanguimorpha,Shinisauridae,Shinisaurus
	Squamata	Helodermatidae	Heloderma suspectum	NC_008776.1	Vertebrata,Euteleostomi,Lepidosauria,Squamata,Bifurcata,Unidentata,Episquamata,Laterata,Lacertibaenia,Amphisbaenia,Rhineuridae,Rhineura
	Squamata	Anguidae	Anguis graeca	NC_048977.1	Vertebrata,Euteleostomi,Lepidosauria,Squamata,Bifurcata,Unidentata,Episquamata,Laterata,Lacertibaenia,Amphisbaenia,Bipedidae,Bipes
	Squamata	Varanidae	Varanus salvator	EU747731.1	Vertebrata,Euteleostomi,Lepidosauria,Squamata,Bifurcata,Unidentata,Episquamata,Laterata,Lacertibaenia,Amphisbaenia,Amphisbaenidae,Geocalamus
	Squamata	Shinisauridae	Shinisaurus crocodilurus	NC_005959.1	Vertebrata,Euteleostomi,Lepidosauria,Squamata,Bifurcata,Unidentata,Episquamata,Laterata,Lacertibaenia,Amphisbaenia,Blanidae,Blanus
	Squamata	Rhineuridae	Rhineura floridana	AY605473.1	Vertebrata,Euteleostomi,Lepidosauria,Squamata,Bifurcata,Unidentata,Episquamata,Laterata,Lacertibaenia,Lacertidae,Lacerta
	Squamata	Bipedidae	Bipes canaliculatus	AY605484.1	Vertebrata,Euteleostomi,Lepidosauria,Squamata,Bifurcata,Unidentata,Episquamata,Laterata,Teiioidea,Gymnophthalmidae,Iphisa
	Squamata	Amphisbaenidae	Geocalamus acutus	AY605476.1	Vertebrata,Euteleostomi,Lepidosauria,Squamata,Bifurcata,Unidentata,Scinciformata,Scincidae,Sphenomorphinae,Tropidophorus
	Squamata	Blanidae	Blanus cinereus	EU443257.1	Vertebrata,Euteleostomi,Lepidosauria,Squamata,Bifurcata,Unidentata,Scinciformata,Xantusiidae,Xantusiinae,Lepidophyma
	Squamata	Lacertidae	Lacerta bilineata	KT722705.2	Vertebrata,Euteleostomi,Lepidosauria,Squamata,Bifurcata,Unidentata,Scinciformata,Cordyloidea,Cordylidae,Smaug
	Squamata	Gymnophthalmidae	Iphisa elegans	MT472615.1	Vertebrata,Euteleostomi,Lepidosauria,Squamata,Bifurcata,Gekkota,Eublepharidae,Eublepharinae,Eublepharis
	Squamata	Scincidae	Tropidophorus hangnam	NC_050664.1	Vertebrata,Euteleostomi,Lepidosauria,Squamata,Bifurcata,Gekkota,Phyllodactylidae,Tarentola
	Squamata	Xantusiidae	Lepidophyma flavimaculatum	NC_008775.1	Vertebrata,Euteleostomi,Lepidosauria,Squamata,Bifurcata,Gekkota,Gekkonidae,Gekkoninae,Gekko
	Squamata	Cordylidae	Smaug warreni	NC_005962.1	Vertebrata,Euteleostomi,Lepidosauria,Squamata,Bifurcata,Gekkota,Sphaerodactylidae,Teratoscincus
	Squamata	Eublepharidae	Eublepharis macularius	NC_033383.1	Vertebrata,Euteleostomi,Lepidosauria,Squamata,Bifurcata,Gekkota,Pygopoidea,Pygopodidae,Aprasia
	Squamata	Phyllodactylidae	Tarentola mauritanica	EU443255.1	Vertebrata,Euteleostomi,Lepidosauria,Sphenodontia,Sphenodontidae,Sphenodon
	Squamata	Gekkonidae	Gekko subpalmatus	MK680534.1	Vertebrata,Euteleostomi,Archelosauria,Archosauria,Crocodylia,Longirostres,Crocodylidae,Crocodylus
	Squamata	Sphaerodactylidae	Teratoscincus roborowskii	MT107158.1	Vertebrata,Euteleostomi,Archelosauria,Archosauria,Crocodylia,Longirostres,Gavialidae,Tomistominae,Tomistoma
	Squamata	Pygopodidae	Aprasia parapulchella	NC_024557.1	Vertebrata,Euteleostomi,Archelosauria,Archosauria,Crocodylia,Alligatoridae,Caimaninae,Caiman
	Testudines	Trionychidae	Chitra vandijki	MT683848.1	Vertebrata,Euteleostomi,Archelosauria,Testudines,Cryptodira,Trionychia,Trionychidae,Chitra
	Testudines	Carettochelyidae	Carettochelys insculpta	FJ862792.1	Vertebrata,Euteleostomi,Archelosauria,Testudines,Cryptodira,Trionychia,Carettochelyidae,Carettochelys
	Testudines	Platysternidae	Platysternon megacephalum	DQ256377.1	Vertebrata,Euteleostomi,Archelosauria,Testudines,Cryptodira,Durocryptodira,Testudinoidea,Platysternidae,Platysternon
	Testudines	Emydidae	Malaclemys terrapin terrapin	NC_031300.1	Vertebrata,Euteleostomi,Archelosauria,Testudines,Cryptodira,Durocryptodira,Testudinoidea,Emydidae,Malaclemys
	Testudines	Geoemydidae	Pangshura sylhetensis	MK580979.1	Vertebrata,Euteleostomi,Archelosauria,Testudines,Cryptodira,Durocryptodira,Testudinoidea,Geoemydidae,Batagurinae,Pangshura
	Testudines	Testudinidae	Geochelone elegans	NC_041096.1	Vertebrata,Euteleostomi,Archelosauria,Testudines,Cryptodira,Durocryptodira,Testudinoidea,Testudinidae,Chelonoidis
	Testudines	Cheloniidae	Lepidochelys kempii	MN136061.1	Vertebrata,Euteleostomi,Archelosauria,Testudines,Cryptodira,Durocryptodira,Americhelydia,Chelonioidea,Cheloniidae,Lepidochelys
	Testudines	Dermochelyidae	Dermochelys coriacea	MF460363.1	Vertebrata,Euteleostomi,Archelosauria,Testudines,Cryptodira,Durocryptodira,Americhelydia,Chelonioidea,Dermochelyidae,Dermochelys
	Testudines	Chelydridae	Chelydra serpentina	DQ256378.1	Vertebrata,Euteleostomi,Archelosauria,Testudines,Cryptodira,Durocryptodira,Americhelydia,Chelydroidea,Chelydridae,Chelydra
Reptilia	Testudines	Kinosternidae	Sternotherus carinatus	HQ114563.1	Vertebrata,Euteleostomi,Archelosauria,Testudines,Cryptodira,Durocryptodira,Americhelydia,Chelydroidea,Kinosternidae,Sternotherus
	Testudines	Chelidae	Emydura tanybaraga	NC_042476.1	Vertebrata,Euteleostomi,Archelosauria,Testudines,Pleurodira,Chelidae,Emydura
	Testudines	Pelomedusidae	Pelusios castaneus	NC_026049.1	Vertebrata,Euteleostomi,Archelosauria,Testudines,Pleurodira,Pelomedusidae,Pelusios
	Testudines	Podocnemididae	Podocnemis unifilis	JF802204.1	Vertebrata,Euteleostomi,Archelosauria,Testudines,Pleurodira,Podocnemididae,Podocnemis
Aves	Accipitriformes	Pandionidae	Pandion haliaetus	DQ780884.1	Vertebrata,Euteleostomi,Archelosauria,Archosauria,Dinosauria,Saurischia,Theropoda,Coelurosauria,Aves,Palaeognathae,Tinamiformes,Tinamidae,Nothoprocta
	Accipitriformes	Cathartidae	Cathartes aura	AY463690.1	Vertebrata,Euteleostomi,Archelosauria,Archosauria,Dinosauria,Saurischia,Theropoda,Coelurosauria,Aves,Palaeognathae,Rheiformes,Rheidae,Rhea
	Accipitriformes	Sagittariidae	Sagittarius serpentarius	NC_023788.1	Vertebrata,Euteleostomi,Archelosauria,Archosauria,Dinosauria,Saurischia,Theropoda,Coelurosauria,Aves,Palaeognathae,Apterygiformes,Apterygidae,Apteryx
	Accipitriformes	Accipitridae	Accipiter nisus	MN929010.1	Vertebrata,Euteleostomi,Archelosauria,Archosauria,Dinosauria,Saurischia,Theropoda,Coelurosauria,Aves,Palaeognathae,Casuariiformes,Casuariidae,Casuarius
	Anseriformes	Anseranatidae	Anseranas semipalmata	MN356217.1	Vertebrata,Euteleostomi,Archelosauria,Archosauria,Dinosauria,Saurischia,Theropoda,Coelurosauria,Aves,Palaeognathae,Casuariiformes,Dromaiidae,Dromaius
	Anseriformes	Anatidae	Mareca penelope	NC_050973.1	Vertebrata,Euteleostomi,Archelosauria,Archosauria,Dinosauria,Saurischia,Theropoda,Coelurosauria,Aves,Palaeognathae,Dinornithiformes,Dinornithidae,Dinornis
	Anseriformes	Anhimidae	Chauna torquata	MN356308.1	Vertebrata,Euteleostomi,Archelosauria,Archosauria,Dinosauria,Saurischia,Theropoda,Coelurosauria,Aves,Palaeognathae,Dinornithiformes,Emeidae,Anomalopteryx
	Apodiformes	Trochilidae	Lophornis magnificus	NC_033414.1	Vertebrata,Euteleostomi,Archelosauria,Archosauria,Dinosauria,Saurischia,Theropoda,Coelurosauria,Aves,Palaeognathae,Struthioniformes,Struthionidae,Struthio
	Apodiformes	Apodidae	Cypseloides fumigatus	NC_034933.1	Vertebrata,Euteleostomi,Archelosauria,Archosauria,Dinosauria,Saurischia,Theropoda,Coelurosauria,Aves,Neognathae,Galloanserae,Galliformes,Megapodiidae,Alectura
	Apterygiformes	Apterygidae	Apteryx rowi	MN356426.1	Vertebrata,Euteleostomi,Archelosauria,Archosauria,Dinosauria,Saurischia,Theropoda,Coelurosauria,Aves,Neognathae,Galloanserae,Galliformes,Odontophoridae,Callipepla
	Bucerotiformes	Bucorvidae	Bucorvus leadbeateri	NC_015199.1	Vertebrata,Euteleostomi,Archelosauria,Archosauria,Dinosauria,Saurischia,Theropoda,Coelurosauria,Aves,Neognathae,Galloanserae,Galliformes,Phasianidae,Phasianinae,Gallus
	Bucerotiformes	Bucerotidae	Rhyticeros undulatus	NC_039950.1	Vertebrata,Euteleostomi,Archelosauria,Archosauria,Dinosauria,Saurischia,Theropoda,Coelurosauria,Aves,Neognathae,Galloanserae,Galliformes,Numididae,Numida
	Caprimulgiformes	Caprimulgidae	Caprimulgus indicus	NC_025773.1	Vertebrata,Euteleostomi,Archelosauria,Archosauria,Dinosauria,Saurischia,Theropoda,Coelurosauria,Aves,Neognathae,Galloanserae,Galliformes,Cracidae,Penelope
	Caprimulgiformes	Steatornithidae	Steatornis caripensis	MN356409.1	Vertebrata,Euteleostomi,Archelosauria,Archosauria,Dinosauria,Saurischia,Theropoda,Coelurosauria,Aves,Neognathae,Galloanserae,Anseriformes,Anseranatidae,Anseranas
	Caprimulgiformes	Aegothelidae	Aegotheles bennettii	MN356366.1	Vertebrata,Euteleostomi,Archelosauria,Archosauria,Dinosauria,Saurischia,Theropoda,Coelurosauria,Aves,Neognathae,Galloanserae,Anseriformes,Anatidae,Anatinae,Mareca
	Casuariiformes	Casuariidae	Casuarius casuarius	MN356153.1	Vertebrata,Euteleostomi,Archelosauria,Archosauria,Dinosauria,Saurischia,Theropoda,Coelurosauria,Aves,Neognathae,Galloanserae,Anseriformes,Anhimidae,Chauna
	Casuariiformes	Dromaiidae	Dromaius novaehollandiae	MN356172.1	Vertebrata,Euteleostomi,Archelosauria,Archosauria,Dinosauria,Saurischia,Theropoda,Coelurosauria,Aves,Neognathae,Musophagiformes,Musophagidae,Corythaixoides
	Charadriiformes	Turnicidae	Turnix velox	MN356355.1	Vertebrata,Euteleostomi,Archelosauria,Archosauria,Dinosauria,Saurischia,Theropoda,Coelurosauria,Aves,Neognathae,Cuculiformes,Centropidae,Centropus
	Charadriiformes	Stercorariidae	Stercorarius parasiticus	MN356186.1	Vertebrata,Euteleostomi,Archelosauria,Archosauria,Dinosauria,Saurischia,Theropoda,Coelurosauria,Aves,Neognathae,Cuculiformes,Cuculidae,Ceuthmochares
	Charadriiformes	Alcidae	Aethia cristatella	NC_045517.1	Vertebrata,Euteleostomi,Archelosauria,Archosauria,Dinosauria,Saurischia,Theropoda,Coelurosauria,Aves,Neognathae,Cuculiformes,Coccyzidae,Piaya
	Charadriiformes	Laridae	Chroicocephalus brunnicephalus	NC_050864.1	Vertebrata,Euteleostomi,Archelosauria,Archosauria,Dinosauria,Saurischia,Theropoda,Coelurosauria,Aves,Neognathae,Cuculiformes,Crotophagidae,Crotophaga
	Charadriiformes	Jacanidae	Hydrophasianus chirurgus	NC_041576.1	Vertebrata,Euteleostomi,Archelosauria,Archosauria,Dinosauria,Saurischia,Theropoda,Coelurosauria,Aves,Neognathae,Cuculiformes,Neomorphidae,Geococcyx
	Charadriiformes	Scolopacidae	Tringa nebularia	MG883743.1	Vertebrata,Euteleostomi,Archelosauria,Archosauria,Dinosauria,Saurischia,Theropoda,Coelurosauria,Aves,Neognathae,Coliiformes,Coliidae,Urocolius
	Charadriiformes	Haematopodidae	Haematopus ostralegus	MH727533.1	Vertebrata,Euteleostomi,Archelosauria,Archosauria,Dinosauria,Saurischia,Theropoda,Coelurosauria,Aves,Neognathae,Trogoniformes,Trogonidae,Trogon
	Charadriiformes	Recurvirostridae	Himantopus himantopus	NC_035423.1	Vertebrata,Euteleostomi,Archelosauria,Archosauria,Dinosauria,Saurischia,Theropoda,Coelurosauria,Aves,Neognathae,Galbuliformes,Bucconidae,Bucco
	Charadriiformes	Charadriidae	Charadrius vociferus	MN356113.1	Vertebrata,Euteleostomi,Archelosauria,Archosauria,Dinosauria,Saurischia,Theropoda,Coelurosauria,Aves,Neognathae,Piciformes,Indicatoridae,Indicator
	Charadriiformes	Burhinidae	Burhinus bistriatus	MN356222.1	Vertebrata,Euteleostomi,Archelosauria,Archosauria,Dinosauria,Saurischia,Theropoda,Coelurosauria,Aves,Neognathae,Piciformes,Picidae,Picoides
	Ciconiiformes	Ciconiidae	Ciconia nigra	MK818509.1	Vertebrata,Euteleostomi,Archelosauria,Archosauria,Dinosauria,Saurischia,Theropoda,Coelurosauria,Aves,Neognathae,Piciformes,Ramphastidae,Pteroglossus
	Ciconiiformes	Pteroclidae	Pterocles burchelli	MN356340.1	Vertebrata,Euteleostomi,Archelosauria,Archosauria,Dinosauria,Saurischia,Theropoda,Coelurosauria,Aves,Neognathae,Piciformes,Megalaimidae,Psilopogon
	Coliiformes	Coliidae	Urocolius indicus	MN356373.1	Vertebrata,Euteleostomi,Archelosauria,Archosauria,Dinosauria,Saurischia,Theropoda,Coelurosauria,Aves,Neognathae,Upupiformes,Upupidae,Upupa
	Columbiformes	Columbidae	Columba hodgsonii	NC_048989.1	Vertebrata,Euteleostomi,Archelosauria,Archosauria,Dinosauria,Saurischia,Theropoda,Coelurosauria,Aves,Neognathae,Upupiformes,Rhinopomastidae,Rhinopomastus
	Columbiformes	Raphidae	Raphus cucullatus	NC_031864.1	Vertebrata,Euteleostomi,Archelosauria,Archosauria,Dinosauria,Saurischia,Theropoda,Coelurosauria,Aves,Neognathae,Bucerotiformes,Bucorvidae,Bucorvus
	Coraciiformes	Coraciidae	Eurystomus gularis	MN356271.1	Vertebrata,Euteleostomi,Archelosauria,Archosauria,Dinosauria,Saurischia,Theropoda,Coelurosauria,Aves,Neognathae,Bucerotiformes,Bucerotidae,Rhyticeros
	Coraciiformes	Brachypteraciidae	Brachypteracias leptosomus	MN356322.1	Vertebrata,Euteleostomi,Archelosauria,Archosauria,Dinosauria,Saurischia,Theropoda,Coelurosauria,Aves,Neognathae,Coraciiformes,Coraciidae,Eurystomus
	Coraciiformes	Todidae	Todus mexicanus	MN356280.1	Vertebrata,Euteleostomi,Archelosauria,Archosauria,Dinosauria,Saurischia,Theropoda,Coelurosauria,Aves,Neognathae,Coraciiformes,Brachypteraciidae,Brachypteracias
	Coraciiformes	Cerylidae	Chloroceryle aenea	MN356219.1	Vertebrata,Euteleostomi,Archelosauria,Archosauria,Dinosauria,Saurischia,Theropoda,Coelurosauria,Aves,Neognathae,Coraciiformes,Todidae,Todus
	Coraciiformes	Alcedinidae	Halcyon senegalensis	MN356338.1	Vertebrata,Euteleostomi,Archelosauria,Archosauria,Dinosauria,Saurischia,Theropoda,Coelurosauria,Aves,Neognathae,Coraciiformes,Cerylidae,Chloroceryle
	Coraciiformes	Meropidae	Merops viridis	NC_034642.1	Vertebrata,Euteleostomi,Archelosauria,Archosauria,Dinosauria,Saurischia,Theropoda,Coelurosauria,Aves,Neognathae,Coraciiformes,Alcedinidae,Halcyon
	Cuculiformes	Centropidae	Centropus unirufus	MN356333.1	Vertebrata,Euteleostomi,Archelosauria,Archosauria,Dinosauria,Saurischia,Theropoda,Coelurosauria,Aves,Neognathae,Coraciiformes,Meropidae,Merops
	Cuculiformes	Cuculidae	Ceuthmochares aereus	MN356158.1	Vertebrata,Euteleostomi,Archelosauria,Archosauria,Dinosauria,Saurischia,Theropoda,Coelurosauria,Aves,Neognathae,Psittaciformes,Psittaculidae,Loriini,Lorius
	Cuculiformes	Coccyzidae	Piaya cayana	MN356301.1	Vertebrata,Euteleostomi,Archelosauria,Archosauria,Dinosauria,Saurischia,Theropoda,Coelurosauria,Aves,Neognathae,Psittaciformes,Psittacidae,Amazona
	Cuculiformes	Crotophagidae	Crotophaga sulcirostris	MN356290.1	Vertebrata,Euteleostomi,Archelosauria,Archosauria,Dinosauria,Saurischia,Theropoda,Coelurosauria,Aves,Neognathae,Psittaciformes,Cacatuidae,Eolophus
	Cuculiformes	Neomorphidae	Geococcyx californianus	EU410488.1	Vertebrata,Euteleostomi,Archelosauria,Archosauria,Dinosauria,Saurischia,Theropoda,Coelurosauria,Aves,Neognathae,Strigiformes,Strigidae,Otus
	Dinornithiformes	Dinornithidae	Dinornis giganteus	AY016013.1	Vertebrata,Euteleostomi,Archelosauria,Archosauria,Dinosauria,Saurischia,Theropoda,Coelurosauria,Aves,Neognathae,Strigiformes,Tytonidae,Tyto
	Dinornithiformes	Emeidae	Anomalopteryx didiformis	MK778441.1	Vertebrata,Euteleostomi,Archelosauria,Archosauria,Dinosauria,Saurischia,Theropoda,Coelurosauria,Aves,Neognathae,Passeriformes,Passeriformesincertaesedis,Myzornis
	Falconiformes	Falconidae	Herpetotheres cachinnans	MN356294.1	Vertebrata,Euteleostomi,Archelosauria,Archosauria,Dinosauria,Saurischia,Theropoda,Coelurosauria,Aves,Neognathae,Passeriformes,Corvoidea,Pachycephalidae,Pachycephala
	Galbuliformes	Bucconidae	Bucco capensis	MN356182.1	Vertebrata,Euteleostomi,Archelosauria,Archosauria,Dinosauria,Saurischia,Theropoda,Coelurosauria,Aves,Neognathae,Passeriformes,Corvoidea,Callaeidae,Heteralocha
	Galliformes	Megapodiidae	Alectura lathami	MN356204.1	Vertebrata,Euteleostomi,Archelosauria,Archosauria,Dinosauria,Saurischia,Theropoda,Coelurosauria,Aves,Neognathae,Passeriformes,Sylvioidea,Locustellidae,Locustella
	Galliformes	Odontophoridae	Callipepla squamata	MN356397.1	Vertebrata,Euteleostomi,Archelosauria,Archosauria,Dinosauria,Saurischia,Theropoda,Coelurosauria,Aves,Neognathae,Passeriformes,Meliphagoidea,Dasyornithidae,Dasyornis
	Galliformes	Phasianidae	Gallus gallus	MN972459.1	Vertebrata,Euteleostomi,Archelosauria,Archosauria,Dinosauria,Saurischia,Theropoda,Coelurosauria,Aves,Neognathae,Passeriformes,Artamidae,Gymnorhina
	Galliformes	Numididae	Numida meleagris	MN356448.1	Vertebrata,Euteleostomi,Archelosauria,Archosauria,Dinosauria,Saurischia,Theropoda,Coelurosauria,Aves,Neognathae,Passeriformes,Philepittidae,Neodrepanis
	Galliformes	Cracidae	Penelope pileata	MN356179.1	Vertebrata,Euteleostomi,Archelosauria,Archosauria,Dinosauria,Saurischia,Theropoda,Coelurosauria,Aves,Neognathae,Passeriformes,Hyliotidae,Hyliota
	Gaviiformes	Gaviidae	Gavia arctica	NC_041165.1	Vertebrata,Euteleostomi,Archelosauria,Archosauria,Dinosauria,Saurischia,Theropoda,Coelurosauria,Aves,Neognathae,Passeriformes,Sylvioidea,Scotocercidae,Horornis
	Gruiformes	Psophiidae	Psophia crepitans	MN356218.1	Vertebrata,Euteleostomi,Archelosauria,Archosauria,Dinosauria,Saurischia,Theropoda,Coelurosauria,Aves,Neognathae,Passeriformes,Dendrocolaptidae,Campylorhamphus
	Gruiformes	Gruidae	Grus americana	MN356326.1	Vertebrata,Euteleostomi,Archelosauria,Archosauria,Dinosauria,Saurischia,Theropoda,Coelurosauria,Aves,Neognathae,Passeriformes,Corvoidea,Platysteiridae,Dyaphorophyia
	Gruiformes	Aramidae	Aramus guarauna	MN356244.1	Vertebrata,Euteleostomi,Archelosauria,Archosauria,Dinosauria,Saurischia,Theropoda,Coelurosauria,Aves,Neognathae,Passeriformes,Acanthisittidae,Acanthisitta
	Gruiformes	Heliornithidae	Heliornis fulica	NC_025499.1	Vertebrata,Euteleostomi,Archelosauria,Archosauria,Dinosauria,Saurischia,Theropoda,Coelurosauria,Aves,Neognathae,Passeriformes,Cotingidae,Cephalopterus
	Gruiformes	Rallidae	Porzana pusilla	MW043485.1	Vertebrata,Euteleostomi,Archelosauria,Archosauria,Dinosauria,Saurischia,Theropoda,Coelurosauria,Aves,Neognathae,Passeriformes,Pipridae,Lepidothrix
	Gruiformes	Otididae	Ardeotis kori	MN356157.1	Vertebrata,Euteleostomi,Archelosauria,Archosauria,Dinosauria,Saurischia,Theropoda,Coelurosauria,Aves,Neognathae,Passeriformes,Tyrannidae,Pachyramphus
	Gruiformes	Rhynochetidae	Rhynochetos jubatus	MN356362.1	Vertebrata,Euteleostomi,Archelosauria,Archosauria,Dinosauria,Saurischia,Theropoda,Coelurosauria,Aves,Neognathae,Passeriformes,Furnariidae,Sclerurus
	Musophagiformes	Musophagidae	Corythaixoides concolor	MN356307.1	Vertebrata,Euteleostomi,Archelosauria,Archosauria,Dinosauria,Saurischia,Theropoda,Coelurosauria,Aves,Neognathae,Passeriformes,Rhinocryptidae,Scytalopus
	Passeriformes	Passeriformesincertaesedis	Myzornis pyrrhoura	MK612108.1	Vertebrata,Euteleostomi,Archelosauria,Archosauria,Dinosauria,Saurischia,Theropoda,Coelurosauria,Aves,Neognathae,Passeriformes,Formicariidae,Formicarius
	Passeriformes	Pachycephalidae	Pachycephala philippinensis	NC_051019.1	Vertebrata,Euteleostomi,Archelosauria,Archosauria,Dinosauria,Saurischia,Theropoda,Coelurosauria,Aves,Neognathae,Passeriformes,Thamnophilidae,Sakesphorus
	Passeriformes	Callaeidae	Heteralocha acutirostris	NC_031351.1	Vertebrata,Euteleostomi,Archelosauria,Archosauria,Dinosauria,Saurischia,Theropoda,Coelurosauria,Aves,Neognathae,Passeriformes,Eurylaimidae,Serilophus
	Passeriformes	Locustellidae	Locustella castanea	MN597062.1	Vertebrata,Euteleostomi,Archelosauria,Archosauria,Dinosauria,Saurischia,Theropoda,Coelurosauria,Aves,Neognathae,Passeriformes,Pittidae,Pitta
	Passeriformes	Dasyornithidae	Dasyornis broadbenti	MN356357.1	Vertebrata,Euteleostomi,Archelosauria,Archosauria,Dinosauria,Saurischia,Theropoda,Coelurosauria,Aves,Neognathae,Passeriformes,Sittidae,Sitta
Aves	Passeriformes	Artamidae	Gymnorhina tibicen	MN356239.1	Vertebrata,Euteleostomi,Archelosauria,Archosauria,Dinosauria,Saurischia,Theropoda,Coelurosauria,Aves,Neognathae,Passeriformes,Certhiidae,Troglodytinae,Thryothorus
	Passeriformes	Philepittidae	Neodrepanis coruscans	MN356283.1	Vertebrata,Euteleostomi,Archelosauria,Archosauria,Dinosauria,Saurischia,Theropoda,Coelurosauria,Aves,Neognathae,Passeriformes,Sylvioidea,Phylloscopidae,Seicercus
	Passeriformes	Hyliotidae	Hyliota flavigaster	NC_024868.1	Vertebrata,Euteleostomi,Archelosauria,Archosauria,Dinosauria,Saurischia,Theropoda,Coelurosauria,Aves,Neognathae,Passeriformes,Sylvioidea,Hirundinidae,Hirundo
	Passeriformes	Scotocercidae	Horornis vulcanius	MN356364.1	Vertebrata,Euteleostomi,Archelosauria,Archosauria,Dinosauria,Saurischia,Theropoda,Coelurosauria,Aves,Neognathae,Passeriformes,Sylvioidea,Pycnonotidae,Pycnonotus
	Passeriformes	Dendrocolaptidae	Campylorhamphus procurvoides	NC_051012.1	Vertebrata,Euteleostomi,Archelosauria,Archosauria,Dinosauria,Saurischia,Theropoda,Coelurosauria,Aves,Neognathae,Passeriformes,Picathartidae,Chaetops
	Passeriformes	Platysteiridae	Dyaphorophyia castanea	NC_051034.1	Vertebrata,Euteleostomi,Archelosauria,Archosauria,Dinosauria,Saurischia,Theropoda,Coelurosauria,Aves,Neognathae,Passeriformes,Cinclidae,Cinclus
	Passeriformes	Acanthisittidae	Acanthisitta chloris	NC_051004.1	Vertebrata,Euteleostomi,Archelosauria,Archosauria,Dinosauria,Saurischia,Theropoda,Coelurosauria,Aves,Neognathae,Passeriformes,Turdidae,Catharus
	Passeriformes	Cotingidae	Cephalopterus ornatus	NC_051008.1	Vertebrata,Euteleostomi,Archelosauria,Archosauria,Dinosauria,Saurischia,Theropoda,Coelurosauria,Aves,Neognathae,Passeriformes,Muscicapidae,Oenanthe
	Passeriformes	Pipridae	Lepidothrix coronata	MN356387.1	Vertebrata,Euteleostomi,Archelosauria,Archosauria,Dinosauria,Saurischia,Theropoda,Coelurosauria,Aves,Neognathae,Passeriformes,Rhabdornithidae,Rhabdornis
	Passeriformes	Tyrannidae	Pachyramphus minor	NC_051035.1	Vertebrata,Euteleostomi,Archelosauria,Archosauria,Dinosauria,Saurischia,Theropoda,Coelurosauria,Aves,Neognathae,Passeriformes,Sturnidae,Buphagus
	Passeriformes	Furnariidae	Sclerurus mexicanus	NC_051010.1	Vertebrata,Euteleostomi,Archelosauria,Archosauria,Dinosauria,Saurischia,Theropoda,Coelurosauria,Aves,Neognathae,Passeriformes,Mimidae,Toxostoma
	Passeriformes	Rhinocryptidae	Scytalopus superciliaris	MN356266.1	Vertebrata,Euteleostomi,Archelosauria,Archosauria,Dinosauria,Saurischia,Theropoda,Coelurosauria,Aves,Neognathae,Passeriformes,Mohoidae,Moho
	Passeriformes	Formicariidae	Formicarius rufipectus	NC_051026.1	Vertebrata,Euteleostomi,Archelosauria,Archosauria,Dinosauria,Saurischia,Theropoda,Coelurosauria,Aves,Neognathae,Passeriformes,Bombycillidae,Phainopepla
	Passeriformes	Thamnophilidae	Sakesphorus luctuosus	NC_051011.1	Vertebrata,Euteleostomi,Archelosauria,Archosauria,Dinosauria,Saurischia,Theropoda,Coelurosauria,Aves,Neognathae,Passeriformes,Petroicidae,Drymodes
	Passeriformes	Eurylaimidae	Serilophus lunatus	MN356238.1	Vertebrata,Euteleostomi,Archelosauria,Archosauria,Dinosauria,Saurischia,Theropoda,Coelurosauria,Aves,Neognathae,Passeriformes,Sylvioidea,Sylviidae,Acrocephalinae,Hylia
	Passeriformes	Pittidae	Pitta sordida	MN356273.1	Vertebrata,Euteleostomi,Archelosauria,Archosauria,Dinosauria,Saurischia,Theropoda,Coelurosauria,Aves,Neognathae,Passeriformes,Sylvioidea,Timaliidae,Pteruthius
	Passeriformes	Sittidae	Sitta villosa	MT444149.1	Vertebrata,Euteleostomi,Archelosauria,Archosauria,Dinosauria,Saurischia,Theropoda,Coelurosauria,Aves,Neognathae,Passeriformes,Sylvioidea,Leiothrichidae,Turdoides
	Passeriformes	Certhiidae	Thryothorus ludovicianus	NC_051032.1	Vertebrata,Euteleostomi,Archelosauria,Archosauria,Dinosauria,Saurischia,Theropoda,Coelurosauria,Aves,Neognathae,Passeriformes,Sylvioidea,Zosteropidae,Hypocryptadius
	Passeriformes	Phylloscopidae	Seicercus examinandus	MK695927.1	Vertebrata,Euteleostomi,Archelosauria,Archosauria,Dinosauria,Saurischia,Theropoda,Coelurosauria,Aves,Neognathae,Passeriformes,Stenostiridae,Culicicapa
	Passeriformes	Hirundinidae	Hirundo albigularis	NC_050299.1	Vertebrata,Euteleostomi,Archelosauria,Archosauria,Dinosauria,Saurischia,Theropoda,Coelurosauria,Aves,Neognathae,Passeriformes,Paridae,Parus
	Passeriformes	Pycnonotidae	Pycnonotus jocosus	MN356264.1	Vertebrata,Euteleostomi,Archelosauria,Archosauria,Dinosauria,Saurischia,Theropoda,Coelurosauria,Aves,Neognathae,Passeriformes,Passerellidae,Zonotrichia
	Passeriformes	Picathartidae	Chaetops frenatus	MN356318.1	Vertebrata,Euteleostomi,Archelosauria,Archosauria,Dinosauria,Saurischia,Theropoda,Coelurosauria,Aves,Neognathae,Passeriformes,Thraupidae,Rhodinocichla
	Passeriformes	Cinclidae	Cinclus mexicanus	NC_051037.1	Vertebrata,Euteleostomi,Archelosauria,Archosauria,Dinosauria,Saurischia,Theropoda,Coelurosauria,Aves,Neognathae,Passeriformes,Passeroidea,Passeridae,Passer
	Passeriformes	Turdidae	Catharus fuscescens	NC_051013.1	Vertebrata,Euteleostomi,Archelosauria,Archosauria,Dinosauria,Saurischia,Theropoda,Coelurosauria,Aves,Neognathae,Passeriformes,Passeroidea,Icteridae,Quiscalus
	Passeriformes	Muscicapidae	Oenanthe oenanthe	NC_051036.1	Vertebrata,Euteleostomi,Archelosauria,Archosauria,Dinosauria,Saurischia,Theropoda,Coelurosauria,Aves,Neognathae,Passeriformes,Passeroidea,Parulidae,Setophaga
	Passeriformes	Rhabdornithidae	Rhabdornis inornatus	NC_051020.1	Vertebrata,Euteleostomi,Archelosauria,Archosauria,Dinosauria,Saurischia,Theropoda,Coelurosauria,Aves,Neognathae,Passeriformes,Passeroidea,Motacillidae,Motacilla
	Passeriformes	Sturnidae	Buphagus erythrorhynchus	MN356312.1	Vertebrata,Euteleostomi,Archelosauria,Archosauria,Dinosauria,Saurischia,Theropoda,Coelurosauria,Aves,Neognathae,Passeriformes,Passeroidea,Fringillidae,Carduelinae,Loxia
	Passeriformes	Mimidae	Toxostoma redivivum	MN356247.1	Vertebrata,Euteleostomi,Archelosauria,Archosauria,Dinosauria,Saurischia,Theropoda,Coelurosauria,Aves,Neognathae,Passeriformes,Passeroidea,Ploceidae,Ploceinae,Ploceus
	Passeriformes	Mohoidae	Moho braccatus	NC_031348.1	Vertebrata,Euteleostomi,Archelosauria,Archosauria,Dinosauria,Saurischia,Theropoda,Coelurosauria,Aves,Neognathae,Passeriformes,Passeroidea,Estrildidae,Erythrura
	Passeriformes	Bombycillidae	Phainopepla nitens	MN356259.1	Vertebrata,Euteleostomi,Archelosauria,Archosauria,Dinosauria,Saurischia,Theropoda,Coelurosauria,Aves,Neognathae,Passeriformes,Passeroidea,Dicaeidae,Dicaeum
	Passeriformes	Petroicidae	Drymodes brunneopygia	MN356369.1	Vertebrata,Euteleostomi,Archelosauria,Archosauria,Dinosauria,Saurischia,Theropoda,Coelurosauria,Aves,Neognathae,Passeriformes,Passeroidea,Nectariniidae,Leptocoma
	Passeriformes	Sylviidae	Hylia prasina	NC_051033.1	Vertebrata,Euteleostomi,Archelosauria,Archosauria,Dinosauria,Saurischia,Theropoda,Coelurosauria,Aves,Neognathae,Passeriformes,Passeroidea,Paramythiidae,Oreocharis
	Passeriformes	Timaliidae	Pteruthius melanotis	MN356376.1	Vertebrata,Euteleostomi,Archelosauria,Archosauria,Dinosauria,Saurischia,Theropoda,Coelurosauria,Aves,Neognathae,Passeriformes,Passeroidea,Melanocharitidae,Melanocharis
	Passeriformes	Leiothrichidae	Turdoides affinis	MN848144.1	Vertebrata,Euteleostomi,Archelosauria,Archosauria,Dinosauria,Saurischia,Theropoda,Coelurosauria,Aves,Neognathae,Passeriformes,Sylvioidea,Alaudidae,Alaudala
	Passeriformes	Zosteropidae	Hypocryptadius cinnamomeus	MN356286.1	Vertebrata,Euteleostomi,Archelosauria,Archosauria,Dinosauria,Saurischia,Theropoda,Coelurosauria,Aves,Neognathae,Passeriformes,Rhipiduridae,Rhipidura
	Passeriformes	Stenostiridae	Culicicapa ceylonensis	NC_042191.1	Vertebrata,Euteleostomi,Archelosauria,Archosauria,Dinosauria,Saurischia,Theropoda,Coelurosauria,Aves,Neognathae,Passeriformes,Meliphagoidea,Acanthizidae,Origma
	Passeriformes	Paridae	Parus major	MN356395.1	Vertebrata,Euteleostomi,Archelosauria,Archosauria,Dinosauria,Saurischia,Theropoda,Coelurosauria,Aves,Neognathae,Passeriformes,Corvoidea,Orthonychidae,Orthonyx
	Passeriformes	Passerellidae	Zonotrichia albicollis	MN356386.1	Vertebrata,Euteleostomi,Archelosauria,Archosauria,Dinosauria,Saurischia,Theropoda,Coelurosauria,Aves,Neognathae,Passeriformes,Corvoidea,Corvidae,Nucifraga
	Passeriformes	Thraupidae	Rhodinocichla rosea	MN356164.1	Vertebrata,Euteleostomi,Archelosauria,Archosauria,Dinosauria,Saurischia,Theropoda,Coelurosauria,Aves,Neognathae,Passeriformes,Corvoidea,Malaconotidae,Dryoscopus
	Passeriformes	Passeridae	Passer domesticus	MN356394.1	Vertebrata,Euteleostomi,Archelosauria,Archosauria,Dinosauria,Saurischia,Theropoda,Coelurosauria,Aves,Neognathae,Passeriformes,Corvoidea,Campephagidae,Edolisoma
	Passeriformes	Icteridae	Quiscalus mexicanus	NC_051021.1	Vertebrata,Euteleostomi,Archelosauria,Archosauria,Dinosauria,Saurischia,Theropoda,Coelurosauria,Aves,Neognathae,Passeriformes,Corvoidea,Laniidae,Lanius
	Passeriformes	Parulidae	Setophaga kirtlandii	NC_051027.1	Vertebrata,Euteleostomi,Archelosauria,Archosauria,Dinosauria,Saurischia,Theropoda,Coelurosauria,Aves,Neognathae,Passeriformes,Corvoidea,Dicruridae,Dicrurus
	Passeriformes	Motacillidae	Motacilla alba	MN356232.1	Vertebrata,Euteleostomi,Archelosauria,Archosauria,Dinosauria,Saurischia,Theropoda,Coelurosauria,Aves,Neognathae,Passeriformes,Corvoidea,Corcoracidae,Struthidea
	Passeriformes	Fringillidae	Loxia leucoptera	NC_051015.1	Vertebrata,Euteleostomi,Archelosauria,Archosauria,Dinosauria,Saurischia,Theropoda,Coelurosauria,Aves,Neognathae,Passeriformes,Corvoidea,Monarchidae,Myiagra
	Passeriformes	Ploceidae	Ploceus nigricollis	NC_051038.1	Vertebrata,Euteleostomi,Archelosauria,Archosauria,Dinosauria,Saurischia,Theropoda,Coelurosauria,Aves,Neognathae,Passeriformes,Corvoidea,Paradisaeidae,Paradisaea
	Passeriformes	Estrildidae	Erythrura gouldiae	NC_050680.1	Vertebrata,Euteleostomi,Archelosauria,Archosauria,Dinosauria,Saurischia,Theropoda,Coelurosauria,Aves,Neognathae,Passeriformes,Corvoidea,Vireonidae,Vireoninae,Vireo
	Passeriformes	Dicaeidae	Dicaeum eximium	NC_051023.1	Vertebrata,Euteleostomi,Archelosauria,Archosauria,Dinosauria,Saurischia,Theropoda,Coelurosauria,Aves,Neognathae,Passeriformes,Corvoidea,Cinclosomatidae,Ptilorrhoa
	Passeriformes	Nectariniidae	Leptocoma aspasia	NC_051024.1	Vertebrata,Euteleostomi,Archelosauria,Archosauria,Dinosauria,Saurischia,Theropoda,Coelurosauria,Aves,Neognathae,Passeriformes,Corvoidea,Irenidae,Irena
	Passeriformes	Paramythiidae	Oreocharis arfaki	MN356352.1	Vertebrata,Euteleostomi,Archelosauria,Archosauria,Dinosauria,Saurischia,Theropoda,Coelurosauria,Aves,Neognathae,Passeriformes,Sylvioidea,Aegithalidae,Aegithalos
	Passeriformes	Melanocharitidae	Melanocharis versteri	MN356347.1	Vertebrata,Euteleostomi,Archelosauria,Archosauria,Dinosauria,Saurischia,Theropoda,Coelurosauria,Aves,Neognathae,Passeriformes,Meliphagoidea,Pardalotidae,Pardalotus
	Passeriformes	Alaudidae	Alaudala cheleensis	MN356181.1	Vertebrata,Euteleostomi,Archelosauria,Archosauria,Dinosauria,Saurischia,Theropoda,Coelurosauria,Aves,Neognathae,Passeriformes,Meliphagoidea,Maluridae,Malurus
	Passeriformes	Rhipiduridae	Rhipidura dahli	NC_051029.1	Vertebrata,Euteleostomi,Archelosauria,Archosauria,Dinosauria,Saurischia,Theropoda,Coelurosauria,Aves,Neognathae,Passeriformes,Climacteridae,Climacteris
	Passeriformes	Acanthizidae	Origma solitaria	MN356360.1	Vertebrata,Euteleostomi,Archelosauria,Archosauria,Dinosauria,Saurischia,Theropoda,Coelurosauria,Aves,Neognathae,Passeriformes,Meliphagoidea,Meliphagidae,Acanthorhynchus
	Passeriformes	Orthonychidae	Orthonyx spaldingii	MN356344.1	Vertebrata,Euteleostomi,Archelosauria,Archosauria,Dinosauria,Saurischia,Theropoda,Coelurosauria,Aves,Neognathae,Passeriformes,Menuridae,Atrichornis
	Passeriformes	Corvidae	Nucifraga caryocatactes	MT506195.1	Vertebrata,Euteleostomi,Archelosauria,Archosauria,Dinosauria,Saurischia,Theropoda,Coelurosauria,Aves,Neognathae,Columbiformes,Columbidae,Columba
	Passeriformes	Malaconotidae	Dryoscopus gambensis	MN356275.1	Vertebrata,Euteleostomi,Archelosauria,Archosauria,Dinosauria,Saurischia,Theropoda,Coelurosauria,Aves,Neognathae,Columbiformes,Raphidae,Raphus
	Passeriformes	Campephagidae	Edolisoma coerulescens	NC_051017.1	Vertebrata,Euteleostomi,Archelosauria,Archosauria,Dinosauria,Saurischia,Theropoda,Coelurosauria,Aves,Neognathae,Phoenicopteriformes,Phoenicopteridae,Phoenicopterus
	Passeriformes	Laniidae	Lanius ludovicianus	NC_051030.1	Vertebrata,Euteleostomi,Archelosauria,Archosauria,Dinosauria,Saurischia,Theropoda,Coelurosauria,Aves,Neognathae,Podicipediformes,Podicipedidae,Tachybaptus
	Passeriformes	Dicruridae	Dicrurus megarhynchus	NC_051028.1	Vertebrata,Euteleostomi,Archelosauria,Archosauria,Dinosauria,Saurischia,Theropoda,Coelurosauria,Aves,Neognathae,Gruiformes,Psophiidae,Psophia
	Passeriformes	Corcoracidae	Struthidea cinerea	MN356345.1	Vertebrata,Euteleostomi,Archelosauria,Archosauria,Dinosauria,Saurischia,Theropoda,Coelurosauria,Aves,Neognathae,Gruiformes,Gruidae,Grus
	Passeriformes	Monarchidae	Myiagra hebetior	NC_051022.1	Vertebrata,Euteleostomi,Archelosauria,Archosauria,Dinosauria,Saurischia,Theropoda,Coelurosauria,Aves,Neognathae,Gruiformes,Aramidae,Aramus
	Passeriformes	Paradisaeidae	Paradisaea raggiana	MN356252.1	Vertebrata,Euteleostomi,Archelosauria,Archosauria,Dinosauria,Saurischia,Theropoda,Coelurosauria,Aves,Neognathae,Gruiformes,Heliornithidae,Heliornis
	Passeriformes	Vireonidae	Vireo altiloquus	NC_051016.1	Vertebrata,Euteleostomi,Archelosauria,Archosauria,Dinosauria,Saurischia,Theropoda,Coelurosauria,Aves,Neognathae,Gruiformes,Rallidae,Porzana
	Passeriformes	Cinclosomatidae	Ptilorrhoa leucosticta	NC_051006.1	Vertebrata,Euteleostomi,Archelosauria,Archosauria,Dinosauria,Saurischia,Theropoda,Coelurosauria,Aves,Neognathae,Gruiformes,Otididae,Ardeotis
	Passeriformes	Irenidae	Irena cyanogastra	NC_051018.1	Vertebrata,Euteleostomi,Archelosauria,Archosauria,Dinosauria,Saurischia,Theropoda,Coelurosauria,Aves,Neognathae,Gruiformes,Rhynochetidae,Rhynochetos
	Passeriformes	Aegithalidae	Aegithalos glaucogularis	NC_024268.1	Vertebrata,Euteleostomi,Archelosauria,Archosauria,Dinosauria,Saurischia,Theropoda,Coelurosauria,Aves,Neognathae,Ciconiiformes,Ciconiidae,Ciconia
	Passeriformes	Pardalotidae	Pardalotus punctatus	MN356359.1	Vertebrata,Euteleostomi,Archelosauria,Archosauria,Dinosauria,Saurischia,Theropoda,Coelurosauria,Aves,Neognathae,Ciconiiformes,Pteroclidae,Pterocles
	Passeriformes	Maluridae	Malurus elegans	MN356354.1	Vertebrata,Euteleostomi,Archelosauria,Archosauria,Dinosauria,Saurischia,Theropoda,Coelurosauria,Aves,Neognathae,Pelecaniformes,Phaethontidae,Phaethon
	Passeriformes	Climacteridae	Climacteris rufus	MN356361.1	Vertebrata,Euteleostomi,Archelosauria,Archosauria,Dinosauria,Saurischia,Theropoda,Coelurosauria,Aves,Neognathae,Pelecaniformes,Pelecanidae,Pelecanus
	Passeriformes	Meliphagidae	Acanthorhynchus tenuirostris	MT457824.1	Vertebrata,Euteleostomi,Archelosauria,Archosauria,Dinosauria,Saurischia,Theropoda,Coelurosauria,Aves,Neognathae,Pelecaniformes,Ardeidae,Egretta
Aves	Passeriformes	Menuridae	Atrichornis clamosus	MN356363.1	Vertebrata,Euteleostomi,Archelosauria,Archosauria,Dinosauria,Saurischia,Theropoda,Coelurosauria,Aves,Neognathae,Pelecaniformes,Threskiornithidae,Mesembrinibis
	Pelecaniformes	Phaethontidae	Phaethon lepturus	NC_027275.1	Vertebrata,Euteleostomi,Archelosauria,Archosauria,Dinosauria,Saurischia,Theropoda,Coelurosauria,Aves,Neognathae,Pelecaniformes,Fregatidae,Fregata
	Pelecaniformes	Pelecanidae	Pelecanus crispus	MK855120.1	Vertebrata,Euteleostomi,Archelosauria,Archosauria,Dinosauria,Saurischia,Theropoda,Coelurosauria,Aves,Neognathae,Pelecaniformes,Anhingidae,Anhinga
	Pelecaniformes	Ardeidae	Egretta garzetta	MN356129.1	Vertebrata,Euteleostomi,Archelosauria,Archosauria,Dinosauria,Saurischia,Theropoda,Coelurosauria,Aves,Neognathae,Pelecaniformes,Phalacrocoracidae,Nannopterum
	Pelecaniformes	Threskiornithidae	Mesembrinibis cayennensis	NC_050835.1	Vertebrata,Euteleostomi,Archelosauria,Archosauria,Dinosauria,Saurischia,Theropoda,Coelurosauria,Aves,Neognathae,Pelecaniformes,Sulidae,Morus
	Pelecaniformes	Fregatidae	Fregata magnificens	MN356268.1	Vertebrata,Euteleostomi,Archelosauria,Archosauria,Dinosauria,Saurischia,Theropoda,Coelurosauria,Aves,Neognathae,Charadriiformes,Turnicidae,Turnix
	Pelecaniformes	Anhingidae	Anhinga melanogaster	MW042786.1	Vertebrata,Euteleostomi,Archelosauria,Archosauria,Dinosauria,Saurischia,Theropoda,Coelurosauria,Aves,Neognathae,Charadriiformes,Stercorariidae,Stercorarius
	Pelecaniformes	Phalacrocoracidae	Nannopterum auritus	MN356400.1	Vertebrata,Euteleostomi,Archelosauria,Archosauria,Dinosauria,Saurischia,Theropoda,Coelurosauria,Aves,Neognathae,Charadriiformes,Alcidae,Aethia
	Pelecaniformes	Sulidae	Morus serrator	GU071056.1	Vertebrata,Euteleostomi,Archelosauria,Archosauria,Dinosauria,Saurischia,Theropoda,Coelurosauria,Aves,Neognathae,Charadriiformes,Laridae,Chroicocephalus
	Phoenicopteriformes	Phoenicopteridae	Phoenicopterus roseus	EF532932.1	Vertebrata,Euteleostomi,Archelosauria,Archosauria,Dinosauria,Saurischia,Theropoda,Coelurosauria,Aves,Neognathae,Charadriiformes,Jacanidae,Hydrophasianus
	Piciformes	Indicatoridae	Indicator maculatus	MN356234.1	Vertebrata,Euteleostomi,Archelosauria,Archosauria,Dinosauria,Saurischia,Theropoda,Coelurosauria,Aves,Neognathae,Charadriiformes,Scolopacidae,Tringa
	Piciformes	Picidae	Picoides pubescens	MN356145.1	Vertebrata,Euteleostomi,Archelosauria,Archosauria,Dinosauria,Saurischia,Theropoda,Coelurosauria,Aves,Neognathae,Charadriiformes,Haematopodidae,Haematopus
	Piciformes	Ramphastidae	Pteroglossus azara flavirostris	DQ780882.1	Vertebrata,Euteleostomi,Archelosauria,Archosauria,Dinosauria,Saurischia,Theropoda,Coelurosauria,Aves,Neognathae,Charadriiformes,Recurvirostridae,Himantopus
	Piciformes	Megalaimidae	Psilopogon haemacephalus	MN356190.1	Vertebrata,Euteleostomi,Archelosauria,Archosauria,Dinosauria,Saurischia,Theropoda,Coelurosauria,Aves,Neognathae,Charadriiformes,Charadriidae,Charadrius
	Podicipediformes	Podicipedidae	Tachybaptus novaehollandiae	EF532936.1	Vertebrata,Euteleostomi,Archelosauria,Archosauria,Dinosauria,Saurischia,Theropoda,Coelurosauria,Aves,Neognathae,Charadriiformes,Burhinidae,Burhinus
	Procellariiformes	Hydrobatidae	Hydrobates tethys	MN356198.1	Vertebrata,Euteleostomi,Archelosauria,Archosauria,Dinosauria,Saurischia,Theropoda,Coelurosauria,Aves,Neognathae,Gaviiformes,Gaviidae,Gavia
	Procellariiformes	Pelecanoididae	Pelecanoides urinatrix	MN356319.1	Vertebrata,Euteleostomi,Archelosauria,Archosauria,Dinosauria,Saurischia,Theropoda,Coelurosauria,Aves,Neognathae,Sphenisciformes,Spheniscidae,Aptenodytes
	Procellariiformes	Procellariidae	Pagodroma nivea	NC_050393.1	Vertebrata,Euteleostomi,Archelosauria,Archosauria,Dinosauria,Saurischia,Theropoda,Coelurosauria,Aves,Neognathae,Procellariiformes,Hydrobatidae,Hydrobates
	Procellariiformes	Diomedeidae	Thalassarche melanophrys	AY158677.2	Vertebrata,Euteleostomi,Archelosauria,Archosauria,Dinosauria,Saurischia,Theropoda,Coelurosauria,Aves,Neognathae,Procellariiformes,Pelecanoididae,Pelecanoides
	Psittaciformes	Psittaculidae	Lorius chlorocercus	MN515396.1	Vertebrata,Euteleostomi,Archelosauria,Archosauria,Dinosauria,Saurischia,Theropoda,Coelurosauria,Aves,Neognathae,Procellariiformes,Procellariidae,Pagodroma
	Psittaciformes	Psittacidae	Amazona guildingii	MN356210.1	Vertebrata,Euteleostomi,Archelosauria,Archosauria,Dinosauria,Saurischia,Theropoda,Coelurosauria,Aves,Neognathae,Procellariiformes,Diomedeidae,Thalassarche
	Psittaciformes	Cacatuidae	Eolophus roseicapillus	NC_040154.1	Vertebrata,Euteleostomi,Archelosauria,Archosauria,Dinosauria,Saurischia,Theropoda,Coelurosauria,Aves,Neognathae,Falconiformes,Falconidae,Herpetotheres
	Rheiformes	Rheidae	Rhea americana	MN356429.1	Vertebrata,Euteleostomi,Archelosauria,Archosauria,Dinosauria,Saurischia,Theropoda,Coelurosauria,Aves,Neognathae,Caprimulgimorphae,Apodiformes,Trochilidae,Lophornis
	Sphenisciformes	Spheniscidae	Aptenodytes patagonicus	NC_045377.1	Vertebrata,Euteleostomi,Archelosauria,Archosauria,Dinosauria,Saurischia,Theropoda,Coelurosauria,Aves,Neognathae,Caprimulgimorphae,Apodiformes,Apodidae,Cypseloidinae,Cypseloides
	Strigiformes	Strigidae	Otus sunia	MN276053.1	Vertebrata,Euteleostomi,Archelosauria,Archosauria,Dinosauria,Saurischia,Theropoda,Coelurosauria,Aves,Neognathae,Caprimulgimorphae,Caprimulgiformes,Caprimulgidae,Caprimulginae,Caprimulgus
	Strigiformes	Tytonidae	Tyto longimembris	KP893332.1	Vertebrata,Euteleostomi,Archelosauria,Archosauria,Dinosauria,Saurischia,Theropoda,Coelurosauria,Aves,Neognathae,Caprimulgimorphae,Caprimulgiformes,Steatornithidae,Steatornis
	Struthioniformes	Struthionidae	Struthio camelus	AF338715.1	Vertebrata,Euteleostomi,Archelosauria,Archosauria,Dinosauria,Saurischia,Theropoda,Coelurosauria,Aves,Neognathae,Caprimulgimorphae,Caprimulgiformes,Aegothelidae,Aegotheles
	Tinamiformes	Tinamidae	Nothoprocta perdicaria	MN356428.1	Vertebrata,Euteleostomi,Archelosauria,Archosauria,Dinosauria,Saurischia,Theropoda,Coelurosauria,Aves,Neognathae,Accipitriformes,Pandionidae,Pandion
	Trogoniformes	Trogonidae	Trogon melanurus	MN356299.1	Vertebrata,Euteleostomi,Archelosauria,Archosauria,Dinosauria,Saurischia,Theropoda,Coelurosauria,Aves,Neognathae,Accipitriformes,Cathartidae,Cathartes
	Upupiformes	Upupidae	Upupa epops	MN356316.1	Vertebrata,Euteleostomi,Archelosauria,Archosauria,Dinosauria,Saurischia,Theropoda,Coelurosauria,Aves,Neognathae,Accipitriformes,Sagittariidae,Sagittarius
	Upupiformes	Rhinopomastidae	Rhinopomastus cyanomelas	MN356260.1	Vertebrata,Euteleostomi,Archelosauria,Archosauria,Dinosauria,Saurischia,Theropoda,Coelurosauria,Aves,Neognathae,Accipitriformes,Accipitridae,Accipitrinae,Accipiter
Mammalia	Ancodonta	Hippopotamidae	Hippopotamus amphibius	AP003425.1	Vertebrata,Euteleostomi,Mammalia,Metatheria,Didelphimorphia,Didelphidae,Tlacuatzin
	Carnivora	Nandiniidae	Nandinia binotata	NC_024567.1	Vertebrata,Euteleostomi,Mammalia,Metatheria,Paucituberculata,Caenolestidae,Caenolestes
	Carnivora	Eupleridae	Mungotictis decemlineata	NC_027828.1	Vertebrata,Euteleostomi,Mammalia,Metatheria,Notoryctemorphia,Notoryctidae,Notoryctes
	Carnivora	Herpestidae	Suricata suricatta	NC_045900.1	Vertebrata,Euteleostomi,Mammalia,Metatheria,Dasyuromorphia,Thylacinidae,Thylacinus
	Carnivora	Hyaenidae	Crocuta crocuta	MN320467.1	Vertebrata,Euteleostomi,Mammalia,Metatheria,Dasyuromorphia,Myrmecobiidae,Myrmecobius
	Carnivora	Viverridae	Arctictis binturong albifrons	KX449332.1	Vertebrata,Euteleostomi,Mammalia,Metatheria,Dasyuromorphia,Dasyuridae,Antechinus
	Carnivora	Felidae	Felis catus	MT499915.1	Vertebrata,Euteleostomi,Mammalia,Metatheria,Peramelemorphia,Peroryctidae,Echymipera
	Carnivora	Canidae	Vulpes lagopus	MT883492.1	Vertebrata,Euteleostomi,Mammalia,Metatheria,Peramelemorphia,Peramelidae,Isoodon
	Carnivora	Procyonidae	Procyon lotor	MT410951.1	Vertebrata,Euteleostomi,Mammalia,Metatheria,Diprotodontia,Phascolarctidae,Phascolarctos
	Carnivora	Mustelidae	Neovison vison	MT410953.1	Vertebrata,Euteleostomi,Mammalia,Metatheria,Diprotodontia,Vombatidae,Vombatus
	Carnivora	Ailuridae	Ailurus fulgens	MK886830.1	Vertebrata,Euteleostomi,Mammalia,Metatheria,Diprotodontia,Potoroidae,Potorous
	Carnivora	Mephitidae	Conepatus chinga	NC_042596.1	Vertebrata,Euteleostomi,Mammalia,Metatheria,Diprotodontia,Phalangeridae,Trichosurus
	Carnivora	Otariidae	Otaria byronia	NC_049152.1	Vertebrata,Euteleostomi,Mammalia,Metatheria,Diprotodontia,Tarsipedidae,Tarsipes
	Carnivora	Odobenidae	Odobenus rosmarus rosmarus	NC_004029.2	Vertebrata,Euteleostomi,Mammalia,Metatheria,Diprotodontia,Petauridae,Dactylopsila
	Carnivora	Phocidae	Leptonychotes weddellii	MT755639.1	Vertebrata,Euteleostomi,Mammalia,Metatheria,Diprotodontia,Pseudocheiridae,Pseudocheirus
	Carnivora	Ursidae	Ursus thibetanus laniger	MN935768.1	Vertebrata,Euteleostomi,Mammalia,Metatheria,Diprotodontia,Acrobatidae,Distoechurus
	Cetacea	Balaenidae	Balaena mysticetus	MN124685.1	Vertebrata,Euteleostomi,Mammalia,Metatheria,Microbiotheria,Microbiotheriidae,Dromiciops
	Cetacea	Balaenopteridae	Balaenoptera physalus	MT410921.1	Vertebrata,Euteleostomi,Mammalia,Eutheria,Laurasiatheria,Insectivora,Talpidae,Uropsilus
	Cetacea	Eschrichtiidae	Eschrichtius robustus	MF409245.1	Vertebrata,Euteleostomi,Mammalia,Eutheria,Laurasiatheria,Artiodactyla,Whippomorpha,Cetacea,Mysticeti,Balaenidae,Balaena
	Cetacea	Neobalaenidae	Caperea marginata	NC_005269.1	Vertebrata,Euteleostomi,Mammalia,Eutheria,Laurasiatheria,Artiodactyla,Whippomorpha,Cetacea,Mysticeti,Balaenopteridae,Balaenoptera
	Cetacea	Physeteridae	Kogia sima	NC_041303.1	Vertebrata,Euteleostomi,Mammalia,Eutheria,Laurasiatheria,Artiodactyla,Whippomorpha,Cetacea,Mysticeti,Eschrichtiidae,Eschrichtius
	Cetacea	Platanistidae	Platanista minor	NC_005275.1	Vertebrata,Euteleostomi,Mammalia,Eutheria,Laurasiatheria,Artiodactyla,Whippomorpha,Cetacea,Mysticeti,Neobalaenidae,Caperea
	Cetacea	Ziphiidae	Hyperoodon ampullatus	MT410957.1	Vertebrata,Euteleostomi,Mammalia,Eutheria,Laurasiatheria,Artiodactyla,Whippomorpha,Cetacea,Odontoceti,Physeteridae,Kogia
	Cetacea	Iniidae	Inia geoffrensis	NC_005276.1	Vertebrata,Euteleostomi,Mammalia,Eutheria,Laurasiatheria,Artiodactyla,Whippomorpha,Cetacea,Odontoceti,Platanistidae,Platanista
	Cetacea	Pontoporiidae	Pontoporia blainvillei	NC_005277.1	Vertebrata,Euteleostomi,Mammalia,Eutheria,Laurasiatheria,Artiodactyla,Whippomorpha,Cetacea,Odontoceti,Ziphiidae,Hyperoodon
	Cetacea	Lipotidae	Lipotes vexillifer	AY789529.1	Vertebrata,Euteleostomi,Mammalia,Eutheria,Laurasiatheria,Artiodactyla,Whippomorpha,Cetacea,Odontoceti,Iniidae,Inia
	Cetacea	Phocoenidae	Phocoena phocoena	MT948111.1	Vertebrata,Euteleostomi,Mammalia,Eutheria,Laurasiatheria,Artiodactyla,Whippomorpha,Cetacea,Odontoceti,Pontoporiidae,Pontoporia
	Cetacea	Monodontidae	Monodon monoceros	MT251289.1	Vertebrata,Euteleostomi,Mammalia,Eutheria,Laurasiatheria,Artiodactyla,Whippomorpha,Cetacea,Odontoceti,Lipotidae,Lipotes
	Cetacea	Delphinidae	Lagenorhynchus acutus	NC_050265.1	Vertebrata,Euteleostomi,Mammalia,Eutheria,Laurasiatheria,Artiodactyla,Whippomorpha,Cetacea,Odontoceti,Phocoenidae,Phocoena
	Chiroptera	Megadermatidae	Megaderma lyra	MG586969.1	Vertebrata,Euteleostomi,Mammalia,Eutheria,Laurasiatheria,Artiodactyla,Whippomorpha,Cetacea,Odontoceti,Monodontidae,Monodon
	Chiroptera	Rhinolophidae	Rhinolophus affinis	MT845219.1	Vertebrata,Euteleostomi,Mammalia,Eutheria,Laurasiatheria,Artiodactyla,Whippomorpha,Cetacea,Odontoceti,Delphinidae,Lagenorhynchus
	Chiroptera	Hipposideridae	Hipposideros armiger	NC_018540.1	Vertebrata,Euteleostomi,Mammalia,Eutheria,Laurasiatheria,Pholidota,Manidae,Manis
	Chiroptera	Pteropodidae	Rousettus amplexicaudatus	MT259592.1	Vertebrata,Euteleostomi,Mammalia,Eutheria,Laurasiatheria,Carnivora,Feliformia,Nandiniidae,Nandinia
	Chiroptera	Noctilionidae	Noctilio leporinus	NC_037137.1	Vertebrata,Euteleostomi,Mammalia,Eutheria,Laurasiatheria,Carnivora,Feliformia,Eupleridae,Galidiinae,Mungotictis
	Chiroptera	Furipteridae	Furipterus horrens	NC_048476.1	Vertebrata,Euteleostomi,Mammalia,Eutheria,Laurasiatheria,Carnivora,Feliformia,Herpestidae,Suricata
	Chiroptera	Mormoopidae	Pteronotus parnellii	NC_023368.1	Vertebrata,Euteleostomi,Mammalia,Eutheria,Laurasiatheria,Carnivora,Feliformia,Hyaenidae,Crocuta
	Chiroptera	Phyllostomidae	Diphylla ecaudata	NC_037138.1	Vertebrata,Euteleostomi,Mammalia,Eutheria,Laurasiatheria,Carnivora,Feliformia,Viverridae,Paradoxurinae,Arctictis
	Chiroptera	Mystacinidae	Mystacina tuberculata	NC_006925.1	Vertebrata,Euteleostomi,Mammalia,Eutheria,Laurasiatheria,Carnivora,Feliformia,Felidae,Felinae,Felis
	Chiroptera	Vespertilionidae	Myotis bombinus	MT985383.1	Vertebrata,Euteleostomi,Mammalia,Eutheria,Laurasiatheria,Carnivora,Caniformia,Canidae,Vulpes
Mammalia	Chiroptera	Molossidae	Tadarida latouchei	NC_036331.1	Vertebrata,Euteleostomi,Mammalia,Eutheria,Laurasiatheria,Carnivora,Caniformia,Procyonidae,Procyon
	Chiroptera	Emballonuridae	Saccopteryx leptura	NC_036421.1	Vertebrata,Euteleostomi,Mammalia,Eutheria,Laurasiatheria,Carnivora,Caniformia,Mustelidae,Mustelinae,Neovison
	Cingulata	Dasypodidae	Dasypus yepesi	NC_028570.1	Vertebrata,Euteleostomi,Mammalia,Eutheria,Laurasiatheria,Carnivora,Caniformia,Ailuridae,Ailurus
	Cingulata	Chlamyphoridae	Euphractus sexcinctus flavimanus	KX151979.1	Vertebrata,Euteleostomi,Mammalia,Eutheria,Laurasiatheria,Carnivora,Caniformia,Mephitidae,Conepatus
	Dasyuromorphia	Thylacinidae	Thylacinus cynocephalus	KY678392.1	Vertebrata,Euteleostomi,Mammalia,Eutheria,Laurasiatheria,Carnivora,Caniformia,Otariidae,Otaria
	Dasyuromorphia	Myrmecobiidae	Myrmecobius fasciatus	FJ515782.1	Vertebrata,Euteleostomi,Mammalia,Eutheria,Laurasiatheria,Carnivora,Caniformia,Odobenidae,Odobenus
	Dasyuromorphia	Dasyuridae	Antechinus arktos	NC_050988.1	Vertebrata,Euteleostomi,Mammalia,Eutheria,Laurasiatheria,Carnivora,Caniformia,Phocidae,Leptonychotes
	Dermoptera	Cynocephalidae	Galeopterus variegatus	AF460846.1	Vertebrata,Euteleostomi,Mammalia,Eutheria,Laurasiatheria,Carnivora,Caniformia,Ursidae,Ursus
	Didelphimorphia	Didelphidae	Tlacuatzin canescens	NC_029381.1	Vertebrata,Euteleostomi,Mammalia,Eutheria,Laurasiatheria,Perissodactyla,Equidae,Equus
	Diprotodontia	Phascolarctidae	Phascolarctos cinereus	NC_008133.1	Vertebrata,Euteleostomi,Mammalia,Eutheria,Laurasiatheria,Perissodactyla,Tapiridae,Tapirus
	Diprotodontia	Vombatidae	Vombatus ursinus	MK360903.1	Vertebrata,Euteleostomi,Mammalia,Eutheria,Laurasiatheria,Perissodactyla,Rhinocerotidae,Rhinoceros
	Diprotodontia	Potoroidae	Potorous tridactylus	NC_006524.1	Vertebrata,Euteleostomi,Mammalia,Eutheria,Laurasiatheria,Chiroptera,Microchiroptera,Megadermatidae,Megaderma
	Diprotodontia	Phalangeridae	Trichosurus vulpecula	AF357238.1	Vertebrata,Euteleostomi,Mammalia,Eutheria,Laurasiatheria,Chiroptera,Microchiroptera,Rhinolophidae,Rhinolophinae,Rhinolophus
	Diprotodontia	Tarsipedidae	Tarsipes rostratus	NC_006518.1	Vertebrata,Euteleostomi,Mammalia,Eutheria,Laurasiatheria,Chiroptera,Microchiroptera,Hipposideridae,Hipposideros
	Diprotodontia	Petauridae	Dactylopsila trivirgata	NC_008134.1	Vertebrata,Euteleostomi,Mammalia,Eutheria,Laurasiatheria,Chiroptera,Megachiroptera,Pteropodidae,Pteropodinae,Rousettus
	Diprotodontia	Pseudocheiridae	Pseudocheirus peregrinus	NC_006519.1	Vertebrata,Euteleostomi,Mammalia,Eutheria,Laurasiatheria,Chiroptera,Microchiroptera,Noctilionidae,Noctilio
	Diprotodontia	Acrobatidae	Distoechurus pennatus	NC_008145.1	Vertebrata,Euteleostomi,Mammalia,Eutheria,Laurasiatheria,Chiroptera,Microchiroptera,Furipteridae,Furipterus
	Eulipotyphla	Solenodontidae	Solenodon paradoxus woodi	KU697363.1	Vertebrata,Euteleostomi,Mammalia,Eutheria,Laurasiatheria,Chiroptera,Microchiroptera,Mormoopidae,Pteronotus
	Eulipotyphla	Erinaceidae	Neotetracus sinensis	NC_019626.1	Vertebrata,Euteleostomi,Mammalia,Eutheria,Laurasiatheria,Chiroptera,Microchiroptera,Phyllostomidae,Desmodontinae,Diphylla
	Eulipotyphla	Soricidae	Crocidura tanakae	NC_046831.1	Vertebrata,Euteleostomi,Mammalia,Eutheria,Laurasiatheria,Chiroptera,Microchiroptera,Mystacinidae,Mystacina
	Hyracoidea	Procaviidae	Procavia capensis	NC_004919.1	Vertebrata,Euteleostomi,Mammalia,Eutheria,Laurasiatheria,Chiroptera,Microchiroptera,Vespertilionidae,Myotis
	Insectivora	Talpidae	Uropsilus sp. LY-2012	KC516778.1	Vertebrata,Euteleostomi,Mammalia,Eutheria,Laurasiatheria,Chiroptera,Microchiroptera,Molossidae,Tadarida
	Lagomorpha	Ochotonidae	Ochotona dauurica	NC_044120.1	Vertebrata,Euteleostomi,Mammalia,Eutheria,Laurasiatheria,Chiroptera,Microchiroptera,Emballonuridae,Emballonurinae,Saccopteryx
	Lagomorpha	Leporidae	Lepus yarkandensis	MG279351.1	Vertebrata,Euteleostomi,Mammalia,Eutheria,Euarchontoglires,Glires,Lagomorpha,Ochotonidae,Ochotona
	Macroscelidea	Macroscelididae	Elephantulus revoilii	MT354768.1	Vertebrata,Euteleostomi,Mammalia,Eutheria,Euarchontoglires,Glires,Lagomorpha,Leporidae,Lepus
	Microbiotheria	Microbiotheriidae	Dromiciops gliroides	NC_005826.1	Vertebrata,Euteleostomi,Mammalia,Eutheria,Euarchontoglires,Glires,Rodentia,Hystricomorpha,Myocastoridae,Myocastor
	Monotremata	Ornithorhynchidae	Ornithorhynchus anatinus	NC_000891.1	Vertebrata,Euteleostomi,Mammalia,Eutheria,Euarchontoglires,Glires,Rodentia,Hystricomorpha,Octodontidae,Octodon
	Monotremata	Tachyglossidae	Zaglossus bruijni	NC_006364.1	Vertebrata,Euteleostomi,Mammalia,Eutheria,Euarchontoglires,Glires,Rodentia,Hystricomorpha,Laonastidae,Laonastes
	Notoryctemorphia	Notoryctidae	Notoryctes typhlops	NC_006522.1	Vertebrata,Euteleostomi,Mammalia,Eutheria,Euarchontoglires,Glires,Rodentia,Hystricomorpha,Thryonomyidae,Thryonomys
	Paucituberculata	Caenolestidae	Caenolestes fuliginosus	NC_005828.1	Vertebrata,Euteleostomi,Mammalia,Eutheria,Euarchontoglires,Glires,Rodentia,Hystricomorpha,Bathyergidae,Heterocephalus
	Peramelemorphia	Peroryctidae	Echymipera rufescens australis	AY795975.1	Vertebrata,Euteleostomi,Mammalia,Eutheria,Euarchontoglires,Glires,Rodentia,Hystricomorpha,Caviidae,Cavia
	Peramelemorphia	Peramelidae	Isoodon macrourus	AF358864.1	Vertebrata,Euteleostomi,Mammalia,Eutheria,Euarchontoglires,Glires,Rodentia,Hystricomorpha,Erethizontidae,Coendou
	Perissodactyla	Equidae	Equus asinus	NC_001788.1	Vertebrata,Euteleostomi,Mammalia,Eutheria,Euarchontoglires,Glires,Rodentia,Hystricomorpha,Ctenomyidae,Ctenomys
	Perissodactyla	Tapiridae	Tapirus indicus	NC_023838.1	Vertebrata,Euteleostomi,Mammalia,Eutheria,Euarchontoglires,Glires,Rodentia,Hystricomorpha,Echimyidae,Proechimys
	Perissodactyla	Rhinocerotidae	Rhinoceros unicornis	NC_001779.1	Vertebrata,Euteleostomi,Mammalia,Eutheria,Euarchontoglires,Glires,Rodentia,Hystricomorpha,Capromyidae,Geocapromys
	Pholidota	Manidae	Manis pentadactyla	MT335859.1	Vertebrata,Euteleostomi,Mammalia,Eutheria,Euarchontoglires,Glires,Rodentia,Hystricomorpha,Chinchillidae,Chinchilla
	Pilosa	Mylodontidae	Mylodon darwinii	MK903501.1	Vertebrata,Euteleostomi,Mammalia,Eutheria,Euarchontoglires,Glires,Rodentia,Hystricomorpha,Hystricidae,Hystrix
	Pilosa	Megatheriidae	Nothrotheriops shastensis	NC_042753.1	Vertebrata,Euteleostomi,Mammalia,Eutheria,Euarchontoglires,Glires,Rodentia,Myomorpha,Muroidea,Muridae,Murinae,Praomys
	Pilosa	Myrmecophagidae	Myrmecophaga tridactyla	MH142215.1	Vertebrata,Euteleostomi,Mammalia,Eutheria,Euarchontoglires,Glires,Rodentia,Myomorpha,Muroidea,Cricetidae,Cricetinae,Cricetulus
	Pilosa	Cyclopedidae	Cyclopes didactylus	NC_028564.1	Vertebrata,Euteleostomi,Mammalia,Eutheria,Euarchontoglires,Glires,Rodentia,Myomorpha,Muroidea,Spalacidae,Myospalacinae,Eospalax
	Pilosa	Megalonychidae	Parocnus serus	NC_042754.1	Vertebrata,Euteleostomi,Mammalia,Eutheria,Euarchontoglires,Glires,Rodentia,Myomorpha,Dipodoidea,Dipodidae,Allactaginae,Allactaga
	Pilosa	Bradypodidae	Bradypus tridactylus	NC_037527.1	Vertebrata,Euteleostomi,Mammalia,Eutheria,Euarchontoglires,Glires,Rodentia,Anomaluromorpha,Anomaluridae,Anomalurus
	Primates	Aotidae	Aotus azarai infulatus	KC592390.1	Vertebrata,Euteleostomi,Mammalia,Eutheria,Euarchontoglires,Glires,Rodentia,Castorimorpha,Castoridae,Castor
	Primates	Lorisidae	Nycticebus coucang insularis	NC_040292.1	Vertebrata,Euteleostomi,Mammalia,Eutheria,Euarchontoglires,Glires,Rodentia,Sciuromorpha,Sciuridae,Callosciurinae,Callosciurini,Callosciurus
	Primates	Galagidae	Galago moholi	NC_021949.1	Vertebrata,Euteleostomi,Mammalia,Eutheria,Euarchontoglires,Glires,Rodentia,Sciuromorpha,Gliridae,Muscardinus
	Primates	Daubentoniidae	Daubentonia madagascariensis	NC_010299.1	Vertebrata,Euteleostomi,Mammalia,Eutheria,Euarchontoglires,Scandentia,Tupaiidae,Tupaia
	Primates	Paleopropithecidae	Palaeopropithecus ingens	NC_026090.1	Vertebrata,Euteleostomi,Mammalia,Eutheria,Euarchontoglires,Dermoptera,Cynocephalidae,Galeopterus
	Primates	Indriidae	Avahi laniger	NC_021940.1	Vertebrata,Euteleostomi,Mammalia,Eutheria,Euarchontoglires,Primates,Haplorrhini,Platyrrhini,Aotidae,Aotus
	Primates	Lepilemuridae	Lepilemur seali	NC_034731.1	Vertebrata,Euteleostomi,Mammalia,Eutheria,Euarchontoglires,Primates,Strepsirrhini,Lorisiformes,Lorisidae,Nycticebus
	Primates	Cheirogaleidae	Microcebus murinus	NC_028718.1	Vertebrata,Euteleostomi,Mammalia,Eutheria,Euarchontoglires,Primates,Strepsirrhini,Lorisiformes,Galagidae,Galago
	Primates	Lemuridae	Prolemur simus	KX932101.1	Vertebrata,Euteleostomi,Mammalia,Eutheria,Euarchontoglires,Primates,Strepsirrhini,Chiromyiformes,Daubentoniidae,Daubentonia
	Primates	Pitheciidae	Cheracebus lugens	KC592393.1	Vertebrata,Euteleostomi,Mammalia,Eutheria,Euarchontoglires,Primates,Strepsirrhini,Lemuriformes,Paleopropithecidae,Palaeopropithecus
	Primates	Cebidae	Sapajus flavius	NC_050883.1	Vertebrata,Euteleostomi,Mammalia,Eutheria,Euarchontoglires,Primates,Strepsirrhini,Lemuriformes,Indriidae,Avahi
	Primates	Atelidae	Alouatta guariba clamitans	KY202428.1	Vertebrata,Euteleostomi,Mammalia,Eutheria,Euarchontoglires,Primates,Strepsirrhini,Lemuriformes,Lepilemuridae,Lepilemur
	Primates	Cercopithecidae	Chlorocebus pygerythrus	MT481926.1	Vertebrata,Euteleostomi,Mammalia,Eutheria,Euarchontoglires,Primates,Strepsirrhini,Lemuriformes,Cheirogaleidae,Microcebus
	Primates	Hylobatidae	Hoolock hoolock	NC_033885.1	Vertebrata,Euteleostomi,Mammalia,Eutheria,Euarchontoglires,Primates,Strepsirrhini,Lemuriformes,Lemuridae,Prolemur
	Primates	Hominidae	Gorilla gorilla	NC_001645.1	Vertebrata,Euteleostomi,Mammalia,Eutheria,Euarchontoglires,Primates,Haplorrhini,Platyrrhini,Pitheciidae,Callicebinae,Cheracebus
	Primates	Tarsiidae	Carlito syrichta	NC_012774.1	Vertebrata,Euteleostomi,Mammalia,Eutheria,Euarchontoglires,Primates,Haplorrhini,Platyrrhini,Cebidae,Cebinae,Sapajus
	Proboscidea	Elephantidae	Mammuthus primigenius	MG334281.1	Vertebrata,Euteleostomi,Mammalia,Eutheria,Euarchontoglires,Primates,Haplorrhini,Platyrrhini,Atelidae,Alouattinae,Alouatta
	Rodentia	Myocastoridae	Myocastor coypus	MH182628.1	Vertebrata,Euteleostomi,Mammalia,Eutheria,Euarchontoglires,Primates,Haplorrhini,Catarrhini,Cercopithecidae,Cercopithecinae,Chlorocebus
	Rodentia	Octodontidae	Octodon degus	HM544134.1	Vertebrata,Euteleostomi,Mammalia,Eutheria,Euarchontoglires,Primates,Haplorrhini,Catarrhini,Hylobatidae,Hoolock
	Rodentia	Laonastidae	Laonastes aenigmamus	NC_030184.1	Vertebrata,Euteleostomi,Mammalia,Eutheria,Euarchontoglires,Primates,Haplorrhini,Catarrhini,Hominidae,Gorilla
	Rodentia	Thryonomyidae	Thryonomys swinderianus	NC_002658.1	Vertebrata,Euteleostomi,Mammalia,Eutheria,Euarchontoglires,Primates,Haplorrhini,Tarsiiformes,Tarsiidae,Carlito
	Rodentia	Bathyergidae	Heterocephalus glaber	JN242813.1	Vertebrata,Euteleostomi,Mammalia,Eutheria,Xenarthra,Cingulata,Dasypodidae,Dasypus
	Rodentia	Caviidae	Cavia porcellus	NC_000884.1	Vertebrata,Euteleostomi,Mammalia,Eutheria,Xenarthra,Cingulata,Chlamyphoridae,Euphractus
	Rodentia	Erethizontidae	Coendou insidiosus	NC_021387.1	Vertebrata,Euteleostomi,Mammalia,Eutheria,Xenarthra,Pilosa,Folivora,Mylodontidae,Mylodon
	Rodentia	Ctenomyidae	Ctenomys leucodon	NC_020659.1	Vertebrata,Euteleostomi,Mammalia,Eutheria,Xenarthra,Pilosa,Folivora,Megatheriidae,Nothrotheriops
	Rodentia	Echimyidae	Proechimys trinitatis	NC_039551.1	Vertebrata,Euteleostomi,Mammalia,Eutheria,Xenarthra,Pilosa,Vermilingua,Myrmecophagidae,Myrmecophaga
	Rodentia	Capromyidae	Geocapromys ingrahami	NC_047305.1	Vertebrata,Euteleostomi,Mammalia,Eutheria,Xenarthra,Pilosa,Vermilingua,Cyclopedidae,Cyclopes
	Rodentia	Chinchillidae	Chinchilla lanigera	NC_021386.1	Vertebrata,Euteleostomi,Mammalia,Eutheria,Xenarthra,Pilosa,Folivora,Megalonychidae,Parocnus
Mammalia	Rodentia	Hystricidae	Hystrix brachyura	NC_050263.1	Vertebrata,Euteleostomi,Mammalia,Eutheria,Xenarthra,Pilosa,Folivora,Bradypodidae,Bradypus
	Rodentia	Muridae	Praomys delectorum	MN807618.1	Vertebrata,Euteleostomi,Mammalia,Eutheria,Afrotheria,Proboscidea,Elephantidae,Mammuthus
	Rodentia	Cricetidae	Cricetulus barabensis	MN056361.1	Vertebrata,Euteleostomi,Mammalia,Eutheria,Afrotheria,Hyracoidea,Procaviidae,Procavia
	Rodentia	Spalacidae	Eospalax smithii	NC_048987.1	Vertebrata,Euteleostomi,Mammalia,Eutheria,Afrotheria,Sirenia,Trichechidae,Trichechus
	Rodentia	Dipodidae	Allactaga williamsi	NC_049035.1	Vertebrata,Euteleostomi,Mammalia,Eutheria,Afrotheria,Sirenia,Dugongidae,Hydrodamalis
	Rodentia	Anomaluridae	Anomalurus pusillus	NC_038174.1	Vertebrata,Euteleostomi,Mammalia,Eutheria,Afrotheria,Macroscelidea,Macroscelididae,Elephantulus
	Rodentia	Castoridae	Castor canadensis	NC_033912.1	Vertebrata,Euteleostomi,Mammalia,Eutheria,Afrotheria,Tubulidentata,Orycteropodidae,Orycteropus
	Rodentia	Sciuridae	Callosciurus notatus	MT231329.1	Vertebrata,Euteleostomi,Mammalia,Monotremata,Ornithorhynchidae,Ornithorhynchus
	Rodentia	Gliridae	Muscardinus avellanarius	NC_050264.1	Vertebrata,Euteleostomi,Mammalia,Monotremata,Tachyglossidae,Zaglossus
	Ruminantia	Tragulidae	Tragulus napu	NC_035821.1	Vertebrata,Euteleostomi,Mammalia,Eutheria,Laurasiatheria,Artiodactyla,Whippomorpha,Ancodonta,Hippopotamidae,Hippopotamus
	Ruminantia	Moschidae	Moschus leucogaster	NC_042604.1	Vertebrata,Euteleostomi,Mammalia,Eutheria,Laurasiatheria,Artiodactyla,Tylopoda,Camelidae,Camelus
	Ruminantia	Bovidae	Bos grunniens	MT162465.1	Vertebrata,Euteleostomi,Mammalia,Eutheria,Laurasiatheria,Artiodactyla,Suina,Tayassuidae,Pecari
	Ruminantia	Giraffidae	Giraffa giraffa angolensis	AP003424.1	Vertebrata,Euteleostomi,Mammalia,Eutheria,Laurasiatheria,Artiodactyla,Suina,Suidae,Sus
	Ruminantia	Antilocapridae	Antilocapra americana	JN632597.1	Vertebrata,Euteleostomi,Mammalia,Eutheria,Laurasiatheria,Eulipotyphla,Solenodontidae,Solenodon
	Ruminantia	Cervidae	Cervus canadensis	NC_050863.1	Vertebrata,Euteleostomi,Mammalia,Eutheria,Laurasiatheria,Eulipotyphla,Erinaceidae,Erinaceinae,Erinaceus
	Scandentia	Tupaiidae	Tupaia splendidula	NC_050994.1	Vertebrata,Euteleostomi,Mammalia,Eutheria,Laurasiatheria,Eulipotyphla,Soricidae,Soricinae,Chodsigoa
	Sirenia	Trichechidae	Trichechus manatus latirostris	MN105083.1	Vertebrata,Euteleostomi,Mammalia,Eutheria,Laurasiatheria,Artiodactyla,Ruminantia,Tragulina,Tragulidae,Tragulus
	Sirenia	Dugongidae	Dugong dugon	NC_003314.1	Vertebrata,Euteleostomi,Mammalia,Eutheria,Laurasiatheria,Artiodactyla,Ruminantia,Pecora,Moschidae,Moschus
	Suina	Tayassuidae	Pecari tajacu	AP003427.1	Vertebrata,Euteleostomi,Mammalia,Eutheria,Laurasiatheria,Artiodactyla,Ruminantia,Pecora,Bovidae,Bovinae,Bos
	Suina	Suidae	Sus scrofa	MN624263.1	Vertebrata,Euteleostomi,Mammalia,Eutheria,Laurasiatheria,Artiodactyla,Ruminantia,Pecora,Giraffidae,Giraffa
	Tubulidentata	Orycteropodidae	Orycteropus afer	NC_002078.1	Vertebrata,Euteleostomi,Mammalia,Eutheria,Laurasiatheria,Artiodactyla,Ruminantia,Pecora,Antilocapridae,Antilocapra
	Tylopoda	Camelidae	Camelus ferus	EF212038.2	Vertebrata,Euteleostomi,Mammalia,Eutheria,Laurasiatheria,Artiodactyla,Ruminantia,Pecora,Cervidae,Cervinae,Cervus
