# Supplementary material for: VertU: universal multilocus primer sets for eDNA metabarcoding of vertebrate diversity, evaluated by both artificial and natural cases
Source: Frontiers journal article supplement (doi:10.3389/fevo.2023.1164206), 2023-06-19
Supplement: Table_2.XLSX [file Table_2.XLSX]

## Sheet: Table S2
Table S2. List of the 50 vertebrate species used in the mock DNA test.							The amount of input DNA used for each mock DNA mixture.
Order	Family	Species	Common name	Sample ID			Input species			DNA used in mock soups (ng)
Carcharhiniformes	Carcharhinidae	Sphyrna lewini	Scalloped Hammerhead	CH01			Sample ID	Species		Mock-even	Mock-gradient
Myliobatiformes	Dasyatidae	Hemitrygon akajei	Red stingray	CH02			RE05	Alligator sinensis		10	1
Acipenseriformes	Acipenseridae	Acipenser ruthenus	Sterlet	AC01			AC09	Misgurnus anguillicaudatus		10	1.2
Acipenseriformes	Acipenseridae	Acipenser transmontanus	White sturgeon	AC02			AC10	Pangasianodon hypophthalmus		10	1.4
Polypteriformes	Polypteridae	Polypterus senegalus	Senegal bichir	AC03			MA07	Homo sapiens		10	1.7
Lepidosteiformes	Lepisosteidae	Lepisosteus oculatus	Spotted gar	AC04			RE01	Carettochelys insculpta		10	2.1
Anguilliformes	Anguillidae	Anguilla japonica	Freshwater eel	AC05			AC11	Hypostomus plecostomus		10	2.5
Osteoglossiformes	Osteoglossidae	Osteoglossum bicirrhosum	Silver Arowana	AC06			AV01	Struthio camelus		10	3
Cypriniformes	Cyprinidae	Carassius auratus	Gold fish	AC07			RE08	Python bivittatus		10	3.6
Cypriniformes	Danionidae	Danio rerio	zebra fish	AC08			MA01	Murina shuipuensis		10	4.3
Cypriniformes	Cobitidae	Misgurnus anguillicaudatus	Pond loach	AC09			AC13	Trichogaster fasciata		10	5.2
Siluriformes	Pangasiidae	Pangasianodon hypophthalmus	Striped Catfish	AC10			AC01	Acipenser ruthenus		10	6.2
Siluriformes	Loricariidae	Hypostomus plecostomus	Suckermouth catfish	AC11			CH02	Hemitrygon akajei		10	7.4
Syn-branchiformes	Synbranchidae	Monopterus albus	finless eel	AC12			MA03	Lutra lutra		10	8.9
Perciformes	Osphronemidae	Trichogaster fasciata	Giant gouramy	AC13			AC05	Anguilla japonica		10	10.7
Dipnoi	Protopteridae	Protopterus annectens	African Lungfish	DI01			AM08	Kaloula pulchra		10	12.8
Dipnoi	Lepidosirenidae	Lepidosiren paradoxa	South American Lungfish	DI02			AC06	Osteoglossum bicirrhosum		10	14.8
Gymnophiona	Ichthyophiidae	Ichthyophis bannanicus	Yunnan Caecilian	AM01			MA04	Sus scrofa		10	17
Caudata	Cryptobranchidae	Andrias davidianus	Giant Salamander	AM02			AV04	Gallus gallus		10	19.5
Caudata	Hynobiidae	Batrachuperus tibetanus	alpine stream salamander	AM03			AC03	Polypterus senegalus		10	22.5
Caudata	Salamandridae	Pachytriton brevipes	Black-spotted Stout Newt	AM04			RE06	Crocodylus siamensis		10	25.8
Caudata	Salamandridae	Cynops orientalis	Oriental Fire-bellied Newt	AM05			AV02	Anas platyrhynchos		10	29.7
Anura	Bombinatoridae	Bombina fortinuptialis	Guangxi firebelly toad	AM06			RE03	Mauremys reevesii		10	34.2
Anura	Bufonidae	Duttaphrynus melanostictus	Asian common toad	AM07			RE10	Bungarus multicinctus		10	39.3
Anura	Microhylidae	Kaloula pulchra	Banded Bull Frog	AM08			AC02	Acipenser transmontanus		10	45.2
Anura	Dicroglossidae	Fejervarya limnocharis	Asian grass frog	AM09			AC07	Carassius auratus		10	51.9
Anura	Rhacophoridae	Polypedates megacephalus	Spot-legged Treefrog	AM10			RE07	Plestiodon chinensis		10	59.7
Tesudines	Carettochelyidae	Carettochelys insculpta	Pitted-Shelled Turtle	RE01			AC12	Monopterus albus		10	68.7
Tesudines	Emydidae	Trachemys scripta	Yellow-bellied Turtle	RE02			AM07	Duttaphrynus melanostictus		10	79
Tesudines	Geoemydidae	Mauremys reevesii	tortoise	RE03			RE02	Trachemys scripta		10	90.8
Tesudines	Podocnemididae	Podocnemis unifilis	Yellow-spotted River Turtle	RE04			AM06	Bombina fortinuptialis		10	104.5
Crocodilia	Alligatoridae	Alligator sinensis	Yangtze alligator	RE05			AV05	Alectoris chukar		10	120.1
Crocodilia	Crocodylidae	Crocodylus siamensis	Siamese Crocodile	RE06			MA06	Mus musculus		10	134.6
Squamata	Scincidae	Plestiodon chinensis	Chinese skink	RE07			CH01	Sphyrna lewini		10	150.7
Squamata	Pythonidae	Python bivittatus	Burmese Pythons	RE08			AM05	Cynops orientalis		10	168.8
Squamata	Colubridae	Oocatochus rufodorsatus	Chinese garter snake	RE09			MA02	Manis pentadactyla		10	189
Squamata	Elapidae	Bungarus multicinctus	Chinese krait	RE10			AC04	Lepisosteus oculatus		10	211.7
Struthionformes	Struthionidae	Struthio camelus	Common Ostrich	AV01			AV03	Columba livia		10	237.1
Anseriformes	Anatidae	Anas platyrhynchos	Mallard	AV02			RE09	Oocatochus rufodorsatus		10	265.6
Columbiformes	Columbidae	Columba livia domestica	domestic pigeon	AV03			MA05	Ochotona curzoniae		10	297.5
Galliformes	Phasianidae	Gallus gallus	Chicken	AV04			AM01	Ichthyophis bannanicus		10	333.2
Galliformes	Phasianidae	Alectoris chukar	chukar	AV05			AM09	Fejervarya limnocharis		10	373.1
Psittaciformes	Psittaculidae	Melopsittacus undulatus	budgie	AV06			AM02	Andrias davidianus		10	417.9
Chiroptera	Vespertilionidae	Murina shuipuensis	Hutton's tube-nosed bat	MA01			AM10	Polypedates megacephalus		10	468.1
Pholidota	Manidae	Manis pentadactyla	Chinese pangolin	MA02			AC08	Danio rerio		10	524.2
Carnivora	Mustelidae	Lutra lutra	European otter	MA03			AM03	Batrachuperus tibetanus		10	587.2
Artiodactyla	Suidae	Sus scrofa domestica	pig	MA04			AV06	Melopsittacus undulatus		10	657.6
Lagomorpha	Ochotonidae	Ochotona curzoniae	plateau pika	MA05			RE04	Podocnemis unifilis		10	736.5
Rodentia	Muridae	Mus musculus	house mouse	MA06			AM04	Pachytriton brevipes		10	824.9
Primates	Hominidae	Homo sapiens	Human	MA07			DI01	Protopterus annectens		10	923.9
							DI02	Lepidosiren paradoxa		10	1034.8
