# Supplementary material for: VertU: universal multilocus primer sets for eDNA metabarcoding of vertebrate diversity, evaluated by both artificial and natural cases
Source: Frontiers journal article supplement (doi:10.3389/fevo.2023.1164206), 2023-06-19
Supplement: Table_3.XLSX [file Table_3.XLSX]

## Sheet: ecocr_result
Higher classification	Species	accession no.	taxonomy	V12S-U	Marver1	12SV5	Telo02	MiFish-U	V16S-U	MarVer3	Vert-16S	Ve16S	VCOI-U	mlCOIintF/ jgHCO2198	Uni-Minibar
Cyclostomata	Eptatretus burgeri	NC_002807.1	Vertebrata;Cyclostomata;Myxini;Myxiniformes;Myxinidae;Eptatretinae;Eptatretus;Eptatretus burgeri	√	√	×	×	×	×	×	×	×	√	√	×
	Eptatretus sp. Nan-Hai	MN737510.1	Vertebrata;Cyclostomata;Myxini;Myxiniformes;Myxinidae;Eptatretinae;Eptatretus;unclassified Eptatretus;Eptatretus sp. Nan-Hai	√	√	×	×	×	×	×	×	×	√	√	√
	Eudontomyzon morii	NC_025582.1	Vertebrata;Cyclostomata;Hyperoartia;Petromyzontiformes;Petromyzontidae;Eudontomyzon;Eudontomyzon morii	√	√	√	√	√	√	√	√	×	√	√	×
	Geotria australis	NC_029404.1	Vertebrata;Cyclostomata;Hyperoartia;Petromyzontiformes;Geotriidae;Geotria;Geotria australis	√	√	√	√	√	√	√	√	×	√	√	×
	Ichthyomyzon fossor	NC_025552.1	Vertebrata;Cyclostomata;Hyperoartia;Petromyzontiformes;Petromyzontidae;Ichthyomyzon;Ichthyomyzon fossor	√	√	√	√	√	√	√	√	×	√	√	×
	Ichthyomyzon gagei	NC_034291.1	Vertebrata;Cyclostomata;Hyperoartia;Petromyzontiformes;Petromyzontidae;Ichthyomyzon;Ichthyomyzon gagei	×	×	√	×	×	√	√	√	×	√	√	×
	Ichthyomyzon unicuspis	NC_025553.1	Vertebrata;Cyclostomata;Hyperoartia;Petromyzontiformes;Petromyzontidae;Ichthyomyzon;Ichthyomyzon unicuspis	√	√	√	√	√	√	√	√	×	√	√	×
	Lampetra aepyptera	NC_026917.1	Vertebrata;Cyclostomata;Hyperoartia;Petromyzontiformes;Petromyzontidae;Lampetra;Lampetra aepyptera	√	√	√	√	√	√	√	√	×	√	×	×
	Lampetra appendix	NC_025583.1	Vertebrata;Cyclostomata;Hyperoartia;Petromyzontiformes;Petromyzontidae;Lampetra;Lampetra appendix	√	√	√	√	√	√	√	√	×	√	√	×
	Lampetra fluviatilis	Y18683.1	Vertebrata;Cyclostomata;Hyperoartia;Petromyzontiformes;Petromyzontidae;Lampetra;Lampetra fluviatilis	√	√	√	√	√	√	√	√	×	√	√	×
	Lethenteron camtschaticum	KJ866209.1	Vertebrata;Cyclostomata;Hyperoartia;Petromyzontiformes;Petromyzontidae;Lethenteron;Lethenteron camtschaticum	√	√	√	√	√	√	√	√	×	√	√	×
	Lethenteron reissneri	KM044273.1	Vertebrata;Cyclostomata;Hyperoartia;Petromyzontiformes;Petromyzontidae;Lethenteron;Lethenteron reissneri	√	√	√	√	√	√	×	√	×	√	√	×
	Myxine glutinosa	NC_002639.1	Vertebrata;Cyclostomata;Myxini;Myxiniformes;Myxinidae;Myxininae;Myxine;Myxine glutinosa	√	√	×	×	×	×	×	×	×	√	√	×
	Petromyzon marinus	U11880.1	Vertebrata;Cyclostomata;Hyperoartia;Petromyzontiformes;Petromyzontidae;Petromyzon;Petromyzon marinus	√	√	√	√	√	√	√	√	×	√	√	×
Chondrichthyes	Aetobatus flagellum	NC_022837.1	Vertebrata;Gnathostomata;Chondrichthyes;Elasmobranchii;Batoidea;Myliobatiformes;Myliobatidae;Myliobatinae;Aetobatus;Aetobatus flagellum	√	√	√	√	√	√	√	√	×	√	√	×
	Alopias pelagicus	KF020876.1	Vertebrata;Gnathostomata;Chondrichthyes;Elasmobranchii;Selachii;Galeomorphii;Galeoidea;Lamniformes;Alopiidae;Alopiinae;Alopias;Alopias pelagicus	√	√	×	√	√	√	√	√	×	√	√	×
	Alopias superciliosus	NC_021443.1	Vertebrata;Gnathostomata;Chondrichthyes;Elasmobranchii;Selachii;Galeomorphii;Galeoidea;Lamniformes;Alopiidae;Alopiinae;Alopias;Alopias superciliosus	√	√	×	√	√	√	√	√	×	√	√	×
	Alopias vulpinus	NC_049866.1	Vertebrata;Gnathostomata;Chondrichthyes;Elasmobranchii;Selachii;Galeomorphii;Galeoidea;Lamniformes;Alopiidae;Alopiinae;Alopias;Alopias vulpinus	√	√	×	√	√	√	√	√	×	√	√	×
	Amblyraja georgiana	NC_037974.1	Vertebrata;Gnathostomata;Chondrichthyes;Elasmobranchii;Batoidea;Rajiformes;Rajidae;Amblyraja;Amblyraja georgiana	√	√	√	√	√	√	√	√	×	√	√	×
	Amblyraja radiata	AF106038.1	Vertebrata;Gnathostomata;Chondrichthyes;Elasmobranchii;Batoidea;Rajiformes;Rajidae;Amblyraja;Amblyraja radiata	√	√	√	√	√	√	√	√	×	√	√	×
	Anoxypristis cuspidata	KP233202.1	Vertebrata;Gnathostomata;Chondrichthyes;Elasmobranchii;Batoidea;Rhinopristiformes;Pristidae;Anoxypristis;Anoxypristis cuspidata	√	√	√	√	√	√	√	√	×	√	√	×
	Atlantoraja castelnaui	NC_025942.1	Vertebrata;Gnathostomata;Chondrichthyes;Elasmobranchii;Batoidea;Rajiformes;Arhynchobatidae;Atlantoraja;Atlantoraja castelnaui	√	√	√	√	√	√	√	√	×	√	√	×
	Bathyraja albomaculata	NC_037964.1	Vertebrata;Gnathostomata;Chondrichthyes;Elasmobranchii;Batoidea;Rajiformes;Arhynchobatidae;Bathyraja;Bathyraja albomaculata	√	√	√	√	√	√	√	√	×	√	√	×
	Bathyraja bergi	KF991391.1	Vertebrata;Gnathostomata;Chondrichthyes;Elasmobranchii;Batoidea;Rajiformes;Arhynchobatidae;Bathyraja;Bathyraja bergi	√	√	√	√	√	√	√	√	×	√	√	×
	Bathyraja eatonii	NC_048964.1	Vertebrata;Gnathostomata;Chondrichthyes;Elasmobranchii;Batoidea;Rajiformes;Arhynchobatidae;Bathyraja;Bathyraja eatonii	√	√	√	√	√	√	√	√	×	√	√	×
	Bathyraja griseocauda	NC_037965.1	Vertebrata;Gnathostomata;Chondrichthyes;Elasmobranchii;Batoidea;Rajiformes;Arhynchobatidae;Bathyraja;Bathyraja griseocauda	√	√	√	√	√	√	√	√	×	√	√	×
	Bathyraja maccaini	NC_037975.1	Vertebrata;Gnathostomata;Chondrichthyes;Elasmobranchii;Batoidea;Rajiformes;Arhynchobatidae;Bathyraja;Bathyraja maccaini	√	√	√	√	√	√	√	√	×	√	√	×
	Bathyraja meridionalis	NC_037976.1	Vertebrata;Gnathostomata;Chondrichthyes;Elasmobranchii;Batoidea;Rajiformes;Arhynchobatidae;Bathyraja;Bathyraja meridionalis	√	√	√	√	√	√	√	√	×	√	√	×
	Bathyraja multispinis	NC_037963.1	Vertebrata;Gnathostomata;Chondrichthyes;Elasmobranchii;Batoidea;Rajiformes;Arhynchobatidae;Bathyraja;Bathyraja multispinis	√	√	√	√	√	√	√	√	×	√	√	×
	Bathyraja richardsoni	NC_037977.1	Vertebrata;Gnathostomata;Chondrichthyes;Elasmobranchii;Batoidea;Rajiformes;Arhynchobatidae;Bathyraja;Bathyraja richardsoni	√	√	√	√	√	√	√	√	×	√	√	×
	Bathyraja shuntovi	NC_037978.1	Vertebrata;Gnathostomata;Chondrichthyes;Elasmobranchii;Batoidea;Rajiformes;Arhynchobatidae;Bathyraja;Bathyraja shuntovi	√	√	√	√	√	√	√	√	×	√	√	×
	Bathytoshia brevicaudata	MT780270.1	Vertebrata;Gnathostomata;Chondrichthyes;Elasmobranchii;Batoidea;Myliobatiformes;Dasyatoidea;Dasyatidae;Bathytoshia;Bathytoshia brevicaudata	√	√	√	√	√	√	√	√	×	√	√	×
	Callorhinchus callorynchus	HM147135.1	Vertebrata;Gnathostomata;Chondrichthyes;Holocephali;Chimaeriformes;Callorhinchidae;Callorhinchus;Callorhinchus callorynchus	√	√	×	√	√	√	√	√	√	√	√	×
	Callorhinchus capensis	HM147136.1	Vertebrata;Gnathostomata;Chondrichthyes;Holocephali;Chimaeriformes;Callorhinchidae;Callorhinchus;Callorhinchus capensis	√	√	×	√	√	√	√	√	√	√	√	×
	Callorhinchus milii	HM147137.1	Vertebrata;Gnathostomata;Chondrichthyes;Holocephali;Chimaeriformes;Callorhinchidae;Callorhinchus;Callorhinchus milii	√	√	×	√	√	√	√	√	√	√	√	×
	Carcharhinus acronotus	NC_024055.1	Vertebrata;Gnathostomata;Chondrichthyes;Elasmobranchii;Selachii;Galeomorphii;Galeoidea;Carcharhiniformes;Carcharhinidae;Carcharhinus;Carcharhinus acronotus	√	√	√	√	√	√	√	√	×	√	√	×
	Carcharhinus albimarginatus	NC_047239.1	Vertebrata;Gnathostomata;Chondrichthyes;Elasmobranchii;Selachii;Galeomorphii;Galeoidea;Carcharhiniformes;Carcharhinidae;Carcharhinus;Carcharhinus albimarginatus	√	√	√	√	√	√	√	√	×	√	√	×
	Carcharhinus amblyrhynchoides	NC_023948.1	Vertebrata;Gnathostomata;Chondrichthyes;Elasmobranchii;Selachii;Galeomorphii;Galeoidea;Carcharhiniformes;Carcharhinidae;Carcharhinus;Carcharhinus amblyrhynchoides	√	√	√	√	√	√	√	√	×	√	√	×
	Carcharhinus amblyrhynchos	MT663280.1	Vertebrata;Gnathostomata;Chondrichthyes;Elasmobranchii;Selachii;Galeomorphii;Galeoidea;Carcharhiniformes;Carcharhinidae;Carcharhinus;Carcharhinus amblyrhynchos	√	√	√	√	√	√	√	√	×	√	√	×
	Carcharhinus amboinensis	NC_026696.1	Vertebrata;Gnathostomata;Chondrichthyes;Elasmobranchii;Selachii;Galeomorphii;Galeoidea;Carcharhiniformes;Carcharhinidae;Carcharhinus;Carcharhinus amboinensis	√	√	√	√	√	√	√	√	×	√	√	×
	Carcharhinus brevipinna	NC_027081.1	Vertebrata;Gnathostomata;Chondrichthyes;Elasmobranchii;Selachii;Galeomorphii;Galeoidea;Carcharhiniformes;Carcharhinidae;Carcharhinus;Carcharhinus brevipinna	√	√	√	√	√	√	√	√	×	√	√	×
	Carcharhinus falciformis	MN943498.1	Vertebrata;Gnathostomata;Chondrichthyes;Elasmobranchii;Selachii;Galeomorphii;Galeoidea;Carcharhiniformes;Carcharhinidae;Carcharhinus;Carcharhinus falciformis	√	√	√	√	√	√	√	√	×	√	√	×
	Carcharhinus leucas	NC_023522.1	Vertebrata;Gnathostomata;Chondrichthyes;Elasmobranchii;Selachii;Galeomorphii;Galeoidea;Carcharhiniformes;Carcharhinidae;Carcharhinus;Carcharhinus leucas	√	√	×	√	√	√	√	√	×	√	√	×
	Carcharhinus longimanus	NC_025520.1	Vertebrata;Gnathostomata;Chondrichthyes;Elasmobranchii;Selachii;Galeomorphii;Galeoidea;Carcharhiniformes;Carcharhinidae;Carcharhinus;Carcharhinus longimanus	√	√	√	√	√	√	√	√	×	√	√	×
	Carcharhinus macloti	NC_024862.1	Vertebrata;Gnathostomata;Chondrichthyes;Elasmobranchii;Selachii;Galeomorphii;Galeoidea;Carcharhiniformes;Carcharhinidae;Carcharhinus;Carcharhinus macloti	√	√	√	√	√	√	√	√	×	√	√	×
	Carcharhinus melanopterus	NC_024284.1	Vertebrata;Gnathostomata;Chondrichthyes;Elasmobranchii;Selachii;Galeomorphii;Galeoidea;Carcharhiniformes;Carcharhinidae;Carcharhinus;Carcharhinus melanopterus	√	√	√	√	√	√	√	√	×	√	×	×
	Carcharhinus obscurus	NC_020611.1	Vertebrata;Gnathostomata;Chondrichthyes;Elasmobranchii;Selachii;Galeomorphii;Galeoidea;Carcharhiniformes;Carcharhinidae;Carcharhinus;Carcharhinus obscurus	√	√	√	√	√	√	√	√	×	√	√	×
	Carcharhinus plumbeus	NC_024596.1	Vertebrata;Gnathostomata;Chondrichthyes;Elasmobranchii;Selachii;Galeomorphii;Galeoidea;Carcharhiniformes;Carcharhinidae;Carcharhinus;Carcharhinus plumbeus	√	√	√	√	√	√	√	√	×	√	√	×
	Carcharhinus sorrah	NC_023521.1	Vertebrata;Gnathostomata;Chondrichthyes;Elasmobranchii;Selachii;Galeomorphii;Galeoidea;Carcharhiniformes;Carcharhinidae;Carcharhinus;Carcharhinus sorrah	√	√	√	√	√	√	√	√	×	√	√	×
	Carcharhinus tjutjot	NC_026871.1	Vertebrata;Gnathostomata;Chondrichthyes;Elasmobranchii;Selachii;Galeomorphii;Galeoidea;Carcharhiniformes;Carcharhinidae;Carcharhinus;Carcharhinus tjutjot	√	√	√	√	√	√	√	√	×	√	√	×
	Carcharias taurus	MH729809.1	Vertebrata;Gnathostomata;Chondrichthyes;Elasmobranchii;Selachii;Galeomorphii;Galeoidea;Lamniformes;Odontaspididae;Carcharias;Carcharias taurus	√	√	×	√	√	√	√	√	×	√	×	×
	Carcharodon carcharias	KY067590.1	Vertebrata;Gnathostomata;Chondrichthyes;Elasmobranchii;Selachii;Galeomorphii;Galeoidea;Lamniformes;Alopiidae;Lamninae;Carcharodon;Carcharodon carcharias	√	√	×	√	√	√	√	√	×	√	√	×
	Cephaloscyllium umbratile	KX354996.1	Vertebrata;Gnathostomata;Chondrichthyes;Elasmobranchii;Selachii;Galeomorphii;Galeoidea;Carcharhiniformes;Scyliorhinidae;Cephaloscyllium;Cephaloscyllium umbratile	√	√	√	√	√	√	√	√	×	√	√	×
	Cetorhinus maximus	KF991387.1	Vertebrata;Gnathostomata;Chondrichthyes;Elasmobranchii;Selachii;Galeomorphii;Galeoidea;Lamniformes;Alopiidae;Cetorhininae;Cetorhinus;Cetorhinus maximus	√	√	×	√	√	√	√	√	×	√	√	×
	Chiloscyllium griseum	NC_017882.1	Vertebrata;Gnathostomata;Chondrichthyes;Elasmobranchii;Selachii;Galeomorphii;Galeoidea;Orectolobiformes;Hemiscylliidae;Chiloscyllium;Chiloscyllium griseum	√	√	√	√	√	√	√	√	×	√	√	×
	Chiloscyllium plagiosum	NC_012570.1	Vertebrata;Gnathostomata;Chondrichthyes;Elasmobranchii;Selachii;Galeomorphii;Galeoidea;Orectolobiformes;Hemiscylliidae;Chiloscyllium;Chiloscyllium plagiosum	√	√	√	√	√	√	√	√	×	√	√	×
	Chiloscyllium punctatum	AP019519.1	Vertebrata;Gnathostomata;Chondrichthyes;Elasmobranchii;Selachii;Galeomorphii;Galeoidea;Orectolobiformes;Hemiscylliidae;Chiloscyllium;Chiloscyllium punctatum	√	√	√	√	√	√	√	√	×	√	√	×
	Chimaera fulva	HM147138.1	Vertebrata;Gnathostomata;Chondrichthyes;Holocephali;Chimaeriformes;Chimaeridae;Chimaera;Chimaera fulva	√	√	×	√	×	√	√	√	×	√	√	×
	Chimaera monstrosa	NC_003136.1	Vertebrata;Gnathostomata;Chondrichthyes;Holocephali;Chimaeriformes;Chimaeridae;Chimaera;Chimaera monstrosa	√	√	×	√	√	√	√	√	×	√	√	×
	Chimaera sp. JHL-2020	MT880605.1	Vertebrata;Gnathostomata;Chondrichthyes;Holocephali;Chimaeriformes;Chimaeridae;Chimaera;unclassified Chimaera;Chimaera sp. JHL-2020	√	√	×	√	×	√	√	√	×	√	√	×
	Chlamydoselachus anguineus	KU159431.1	Vertebrata;Gnathostomata;Chondrichthyes;Elasmobranchii;Selachii;Squalomorphii;Hexanchiformes;Chlamydoselachidae;Chlamydoselachus;Chlamydoselachus anguineus	√	√	√	√	√	√	√	√	×	√	√	×
	Cirrhigaleus australis	NC_024059.2	Vertebrata;Gnathostomata;Chondrichthyes;Elasmobranchii;Selachii;Squalomorphii;Squaliformes;Squalidae;Cirrhigaleus;Cirrhigaleus australis	√	√	√	√	√	√	√	√	×	√	√	×
	Dipturus argentinensis	KF962934.1	Vertebrata;Gnathostomata;Chondrichthyes;Elasmobranchii;Batoidea;Rajiformes;Rajidae;Dipturus;Dipturus argentinensis	√	√	√	√	√	√	√	√	×	√	√	×
	Dipturus batis	MN820820.1	Vertebrata;Gnathostomata;Chondrichthyes;Elasmobranchii;Batoidea;Rajiformes;Rajidae;Dipturus;Dipturus batis	√	√	√	√	√	√	√	√	×	√	√	×
	Dipturus chilensis	MF278962.1	Vertebrata;Gnathostomata;Chondrichthyes;Elasmobranchii;Batoidea;Rajiformes;Rajidae;Dipturus;Dipturus chilensis	√	√	√	√	√	√	√	√	×	√	√	×
	Dipturus innominatus	NC_037962.1	Vertebrata;Gnathostomata;Chondrichthyes;Elasmobranchii;Batoidea;Rajiformes;Rajidae;Dipturus;Dipturus innominatus	√	√	√	√	√	√	√	√	×	√	√	×
	Dipturus kwangtungensis	NC_023505.2	Vertebrata;Gnathostomata;Chondrichthyes;Elasmobranchii;Batoidea;Rajiformes;Rajidae;Dipturus;Dipturus kwangtungensis	√	√	√	√	√	√	√	√	×	√	√	×
	Dipturus linteus	NC_049882.1	Vertebrata;Gnathostomata;Chondrichthyes;Elasmobranchii;Batoidea;Rajiformes;Rajidae;Rajella;Rajella lintea	√	√	√	√	√	√	√	√	×	√	√	×
	Dipturus maugeanus	NC_037966.1	Vertebrata;Gnathostomata;Chondrichthyes;Elasmobranchii;Batoidea;Rajiformes;Rajidae;Dipturus;Dipturus maugeanus	√	√	√	√	√	√	√	√	×	√	√	×
	Dipturus nasutus	NC_037961.1	Vertebrata;Gnathostomata;Chondrichthyes;Elasmobranchii;Batoidea;Rajiformes;Rajidae;Dipturus;Dipturus nasutus	√	√	√	√	√	√	√	√	×	√	√	×
	Dipturus oxyrinchus	MT410918.1	Vertebrata;Gnathostomata;Chondrichthyes;Elasmobranchii;Batoidea;Rajiformes;Rajidae;Dipturus;Dipturus oxyrinchus	√	√	√	√	√	√	√	√	×	√	√	×
	Dipturus trachyderma	NC_027521.1	Vertebrata;Gnathostomata;Chondrichthyes;Elasmobranchii;Batoidea;Rajiformes;Rajidae;Dipturus;Dipturus trachyderma	√	√	√	√	√	√	√	√	×	√	√	×
	Etmopterus pusillus	NC_031810.1	Vertebrata;Gnathostomata;Chondrichthyes;Elasmobranchii;Selachii;Squalomorphii;Squaliformes;Etmopteridae;Etmopterus;Etmopterus pusillus	√	√	√	√	√	√	√	√	×	√	√	×
	Etmopterus spinax	MN122934.1	Vertebrata;Gnathostomata;Chondrichthyes;Elasmobranchii;Selachii;Squalomorphii;Squaliformes;Etmopteridae;Etmopterus;Etmopterus spinax	√	√	√	√	√	√	√	√	×	√	√	×
	Eusphyra blochii	KJ128290.1	Vertebrata;Gnathostomata;Chondrichthyes;Elasmobranchii;Selachii;Galeomorphii;Galeoidea;Carcharhiniformes;Sphyrnidae;Eusphyra;Eusphyra blochii	√	√	√	√	√	√	√	√	×	√	√	×
	Galeocerdo cuvier	MH648005.1	Vertebrata;Gnathostomata;Chondrichthyes;Elasmobranchii;Selachii;Galeomorphii;Galeoidea;Carcharhiniformes;Carcharhinidae;Galeocerdo;Galeocerdo cuvier	√	√	√	√	√	√	√	√	×	√	√	×
	Galeus melastomus	NC_049881.1	Vertebrata;Gnathostomata;Chondrichthyes;Elasmobranchii;Selachii;Galeomorphii;Galeoidea;Carcharhiniformes;Scyliorhinidae;Galeus;Galeus melastomus	√	√	×	√	√	√	√	√	×	√	√	×
	Ginglymostoma cirratum	NC_030189.1	Vertebrata;Gnathostomata;Chondrichthyes;Elasmobranchii;Selachii;Galeomorphii;Galeoidea;Orectolobiformes;Ginglymostomatidae;Ginglymostoma;Ginglymostoma cirratum	√	√	√	√	√	√	√	√	√	√	√	×
	Glaucostegus granulatus	MN783017.1	Vertebrata;Gnathostomata;Chondrichthyes;Elasmobranchii;Batoidea;Rhinopristiformes;Glaucostegidae;Glaucostegus;Glaucostegus granulatus	√	√	√	√	√	√	√	√	×	√	√	×
	Glyphis fowlerae	NC_028342.1	Vertebrata;Gnathostomata;Chondrichthyes;Elasmobranchii;Selachii;Galeomorphii;Galeoidea;Carcharhiniformes;Carcharhinidae;Glyphis;Glyphis fowlerae	√	√	√	√	√	√	√	√	×	√	√	×
	Glyphis gangeticus	NC_028338.1	Vertebrata;Gnathostomata;Chondrichthyes;Elasmobranchii;Selachii;Galeomorphii;Galeoidea;Carcharhiniformes;Carcharhinidae;Glyphis;Glyphis gangeticus	√	√	√	√	√	√	√	√	×	√	√	×
	Glyphis garricki	KT698059.1	Vertebrata;Gnathostomata;Chondrichthyes;Elasmobranchii;Selachii;Galeomorphii;Galeoidea;Carcharhiniformes;Carcharhinidae;Glyphis;Glyphis garricki	√	√	√	√	√	√	√	√	×	√	√	×
	Glyphis glyphis	NC_021768.2	Vertebrata;Gnathostomata;Chondrichthyes;Elasmobranchii;Selachii;Galeomorphii;Galeoidea;Carcharhiniformes;Carcharhinidae;Glyphis;Glyphis glyphis	√	√	√	√	√	√	√	√	×	√	√	×
	Glyphis siamensis	NC_028344.1	Vertebrata;Gnathostomata;Chondrichthyes;Elasmobranchii;Selachii;Galeomorphii;Galeoidea;Carcharhiniformes;Carcharhinidae;Glyphis;Glyphis siamensis	√	√	√	√	√	√	√	√	×	√	√	×
	Glyphis sp. Bangladesh	NC_028343.1	Vertebrata;Gnathostomata;Chondrichthyes;Elasmobranchii;Selachii;Galeomorphii;Galeoidea;Carcharhiniformes;Carcharhinidae;Glyphis;unclassified Glyphis (in: Chordata);Glyphis sp. Bangladesh	√	√	√	√	√	√	√	√	×	√	√	×
	Glyphis sp. Borneo	NC_028339.1	Vertebrata;Gnathostomata;Chondrichthyes;Elasmobranchii;Selachii;Galeomorphii;Galeoidea;Carcharhiniformes;Carcharhinidae;Glyphis;unclassified Glyphis (in: Chordata);Glyphis sp. Borneo	√	√	√	√	√	√	√	√	×	√	√	×
	Glyphis sp. Pakistan	NC_028337.1	Vertebrata;Gnathostomata;Chondrichthyes;Elasmobranchii;Selachii;Galeomorphii;Galeoidea;Carcharhiniformes;Carcharhinidae;Glyphis;unclassified Glyphis (in: Chordata);Glyphis sp. Pakistan	√	√	√	√	√	√	√	√	×	√	√	×
	Gymnura poecilura	NC_024102.1	Vertebrata;Gnathostomata;Chondrichthyes;Elasmobranchii;Batoidea;Myliobatiformes;Urolophoidea;Gymnuridae;Gymnura;Gymnura poecilura	√	√	√	√	√	√	√	√	×	√	√	×
	Halaelurus buergeri	NC_031811.1	Vertebrata;Gnathostomata;Chondrichthyes;Elasmobranchii;Selachii;Galeomorphii;Galeoidea;Carcharhiniformes;Scyliorhinidae;Halaelurus;Halaelurus buergeri	√	√	×	√	√	√	√	√	×	√	√	×
	Harriotta raleighana	HM147140.1	Vertebrata;Gnathostomata;Chondrichthyes;Holocephali;Chimaeriformes;Rhinochimaeridae;Harriotta;Harriotta raleighana	√	√	×	√	√	√	√	√	×	√	√	×
	Hemigaleus microstoma	NC_029400.1	Vertebrata;Gnathostomata;Chondrichthyes;Elasmobranchii;Selachii;Galeomorphii;Galeoidea;Carcharhiniformes;Hemigaleidae;Hemigaleus;Hemigaleus microstoma	√	×	×	×	×	√	√	√	×	√	√	×
	Hemipristis elongata	NC_032065.1	Vertebrata;Gnathostomata;Chondrichthyes;Elasmobranchii;Selachii;Galeomorphii;Galeoidea;Carcharhiniformes;Hemigaleidae;Hemipristis;Hemipristis elongata	√	×	×	×	×	√	√	√	×	√	√	×
	Hemiscyllium ocellatum	NC_044745.1	Vertebrata;Gnathostomata;Chondrichthyes;Elasmobranchii;Selachii;Galeomorphii;Galeoidea;Orectolobiformes;Hemiscylliidae;Hemiscyllium;Hemiscyllium ocellatum	√	√	√	√	√	√	√	√	×	√	√	×
	Hemitriakis japanica	NC_026774.1	Vertebrata;Gnathostomata;Chondrichthyes;Elasmobranchii;Selachii;Galeomorphii;Galeoidea;Carcharhiniformes;Triakidae;Hemitriakis;Hemitriakis japanica	√	√	√	√	√	√	√	√	×	√	√	×
	Hemitrygon akajei	NC_021132.1	Vertebrata;Gnathostomata;Chondrichthyes;Elasmobranchii;Batoidea;Myliobatiformes;Dasyatoidea;Dasyatidae;Hemitrygon;Hemitrygon akajei	√	√	√	√	√	√	√	√	×	√	√	×
	Hemitrygon bennettii	KC633222.1	Vertebrata;Gnathostomata;Chondrichthyes;Elasmobranchii;Batoidea;Myliobatiformes;Dasyatoidea;Dasyatidae;Hemitrygon;Hemitrygon bennettii	√	√	√	√	√	√	√	√	×	√	√	×
	Heterodontus francisci	NC_003137.1	Vertebrata;Gnathostomata;Chondrichthyes;Elasmobranchii;Selachii;Galeomorphii;Heterodontoidea;Heterodontiformes;Heterodontidae;Heterodontus;Heterodontus francisci	√	√	√	√	√	√	√	√	×	√	√	×
	Heterodontus zebra	NC_021615.1	Vertebrata;Gnathostomata;Chondrichthyes;Elasmobranchii;Selachii;Galeomorphii;Heterodontoidea;Heterodontiformes;Heterodontidae;Heterodontus;Heterodontus zebra	√	√	√	√	√	√	√	√	×	√	√	×
	Hexanchus griseus	KF894491.1	Vertebrata;Gnathostomata;Chondrichthyes;Elasmobranchii;Selachii;Squalomorphii;Hexanchiformes;Hexanchidae;Hexanchus;Hexanchus griseus	√	√	√	√	√	√	√	√	×	√	×	×
	Himantura dalyensis	NC_027649.1	Vertebrata;Gnathostomata;Chondrichthyes;Elasmobranchii;Batoidea;Myliobatiformes;Dasyatoidea;Dasyatidae;Himantura;Himantura dalyensis	√	√	√	√	√	√	√	√	×	√	√	×
	Himantura microphthalma	NC_026285.1	Vertebrata;Gnathostomata;Chondrichthyes;Elasmobranchii;Batoidea;Myliobatiformes;Dasyatoidea;Dasyatidae;Himantura;Himantura microphthalma	√	√	√	√	√	√	√	√	×	√	√	×
	Himantura uarnak	NC_028325.1	Vertebrata;Gnathostomata;Chondrichthyes;Elasmobranchii;Batoidea;Myliobatiformes;Dasyatoidea;Dasyatidae;Himantura;Himantura uarnak	√	√	√	√	√	√	√	√	×	√	√	×
	Hongeo koreana	NC_021963.1	Vertebrata;Gnathostomata;Chondrichthyes;Elasmobranchii;Batoidea;Rajiformes;Rajidae;Hongeo;Hongeo koreana	√	√	√	√	√	√	√	√	×	√	√	×
	Hydrolagus affinis	NC_047231.1	Vertebrata;Gnathostomata;Chondrichthyes;Holocephali;Chimaeriformes;Chimaeridae;Hydrolagus;Hydrolagus affinis	√	√	×	√	×	√	√	√	×	√	√	×
	Hydrolagus lemures	HM147139.1	Vertebrata;Gnathostomata;Chondrichthyes;Holocephali;Chimaeriformes;Chimaeridae;Hydrolagus;Hydrolagus lemures	√	√	×	√	×	√	√	√	×	√	×	×
	Hydrolagus mirabilis	MW029477.1	Vertebrata;Gnathostomata;Chondrichthyes;Holocephali;Chimaeriformes;Chimaeridae;Hydrolagus;Hydrolagus mirabilis	√	√	×	√	×	√	√	√	×	√	√	×
	Isurus oxyrinchus	MF537044.1	Vertebrata;Gnathostomata;Chondrichthyes;Elasmobranchii;Selachii;Galeomorphii;Galeoidea;Lamniformes;Alopiidae;Lamninae;Isurus;Isurus oxyrinchus	√	√	×	√	√	√	√	√	×	√	√	×
	Isurus paucus	NC_024101.1	Vertebrata;Gnathostomata;Chondrichthyes;Elasmobranchii;Selachii;Galeomorphii;Galeoidea;Lamniformes;Alopiidae;Lamninae;Isurus;Isurus paucus	√	√	×	√	√	√	√	√	×	√	√	×
	Lamiopsis temminckii	NC_028341.1	Vertebrata;Gnathostomata;Chondrichthyes;Elasmobranchii;Selachii;Galeomorphii;Galeoidea;Carcharhiniformes;Carcharhinidae;Lamiopsis;Lamiopsis temminckii	√	√	√	√	√	√	√	√	×	√	√	×
	Lamiopsis tephrodes	NC_028340.1	Vertebrata;Gnathostomata;Chondrichthyes;Elasmobranchii;Selachii;Galeomorphii;Galeoidea;Carcharhiniformes;Carcharhinidae;Lamiopsis;Lamiopsis tephrodes	√	√	√	√	√	√	√	√	×	√	√	×
	Lamna ditropis	NC_024269.1	Vertebrata;Gnathostomata;Chondrichthyes;Elasmobranchii;Selachii;Galeomorphii;Galeoidea;Lamniformes;Alopiidae;Lamninae;Lamna;Lamna ditropis	√	√	×	√	√	√	√	√	×	√	√	×
	Lamna nasus	MT410902.1	Vertebrata;Gnathostomata;Chondrichthyes;Elasmobranchii;Selachii;Galeomorphii;Galeoidea;Lamniformes;Alopiidae;Lamninae;Lamna;Lamna nasus	√	√	×	√	√	√	√	√	×	√	√	×
	Leucoraja circularis	NC_037969.1	Vertebrata;Gnathostomata;Chondrichthyes;Elasmobranchii;Batoidea;Rajiformes;Rajidae;Leucoraja;Leucoraja circularis	√	√	√	√	×	√	√	√	×	√	√	×
	Leucoraja erinacea	JQ034406.1	Vertebrata;Gnathostomata;Chondrichthyes;Elasmobranchii;Batoidea;Rajiformes;Rajidae;Leucoraja;Leucoraja erinacea	√	√	√	√	√	√	√	√	×	√	√	×
	Leucoraja naevus	NC_037968.1	Vertebrata;Gnathostomata;Chondrichthyes;Elasmobranchii;Batoidea;Rajiformes;Rajidae;Leucoraja;Leucoraja naevus	√	√	√	√	√	√	√	√	×	√	√	×
	Loxodon macrorhinus	NC_029843.1	Vertebrata;Gnathostomata;Chondrichthyes;Elasmobranchii;Selachii;Galeomorphii;Galeoidea;Carcharhiniformes;Carcharhinidae;Loxodon;Loxodon macrorhinus	√	√	√	√	√	√	√	√	×	√	√	×
	Maculabatis gerrardi	KP091437.1	Vertebrata;Gnathostomata;Chondrichthyes;Elasmobranchii;Batoidea;Myliobatiformes;Dasyatoidea;Dasyatidae;Maculabatis;Maculabatis gerrardi	√	√	√	√	√	√	√	√	×	√	√	×
	Megachasma pelagios	NC_021442.1	Vertebrata;Gnathostomata;Chondrichthyes;Elasmobranchii;Selachii;Galeomorphii;Galeoidea;Lamniformes;Megachasmidae;Megachasma;Megachasma pelagios	√	√	×	√	√	√	√	√	×	√	√	×
	Mitsukurina owstoni	EU528659.1	Vertebrata;Gnathostomata;Chondrichthyes;Elasmobranchii;Selachii;Galeomorphii;Galeoidea;Lamniformes;Mitsukurinidae;Mitsukurina;Mitsukurina owstoni	√	√	×	√	√	√	√	√	×	√	√	×
	Mobula eregoodootenkee	NC_025954.1	Vertebrata;Gnathostomata;Chondrichthyes;Elasmobranchii;Batoidea;Myliobatiformes;Myliobatidae;Mobulinae;Mobula;Mobula eregoodootenkee	√	√	√	√	√	√	√	√	×	√	√	×
	Mobula japanica	NC_018784.1	Vertebrata;Gnathostomata;Chondrichthyes;Elasmobranchii;Batoidea;Myliobatiformes;Myliobatidae;Mobulinae;Mobula;Mobula japanica	√	√	√	√	√	√	√	√	×	√	√	×
	Mobula mobular	KT203434.1	Vertebrata;Gnathostomata;Chondrichthyes;Elasmobranchii;Batoidea;Myliobatiformes;Myliobatidae;Mobulinae;Mobula;Mobula mobular	√	√	√	√	√	√	√	√	×	√	√	×
	Mobula tarapacana	NC_040922.1	Vertebrata;Gnathostomata;Chondrichthyes;Elasmobranchii;Batoidea;Myliobatiformes;Myliobatidae;Mobulinae;Mobula;Mobula tarapacana	√	√	√	√	√	√	√	√	×	√	√	×
	Mobula thurstoni	NC_037219.1	Vertebrata;Gnathostomata;Chondrichthyes;Elasmobranchii;Batoidea;Myliobatiformes;Myliobatidae;Mobulinae;Mobula;Mobula thurstoni	√	√	√	√	√	√	√	√	×	√	√	×
	Mustelus griseus	NC_023527.1	Vertebrata;Gnathostomata;Chondrichthyes;Elasmobranchii;Selachii;Galeomorphii;Galeoidea;Carcharhiniformes;Triakidae;Mustelus;Mustelus griseus	√	√	×	√	√	√	√	√	×	√	×	×
	Mustelus manazo	NC_000890.1	Vertebrata;Gnathostomata;Chondrichthyes;Elasmobranchii;Selachii;Galeomorphii;Galeoidea;Carcharhiniformes;Triakidae;Mustelus;Mustelus manazo	√	√	√	√	√	√	√	√	×	√	√	×
	Mustelus mustelus	NC_039629.1	Vertebrata;Gnathostomata;Chondrichthyes;Elasmobranchii;Selachii;Galeomorphii;Galeoidea;Carcharhiniformes;Triakidae;Mustelus;Mustelus mustelus	√	√	×	√	√	√	√	√	×	√	×	×
	Narcine bancroftii	NC_034772.1	Vertebrata;Gnathostomata;Chondrichthyes;Elasmobranchii;Batoidea;Torpediniformes;Narcinidae;Narcine;Narcine bancroftii	√	√	×	×	×	×	√	√	×	√	√	×
	Narcine brasiliensis	NC_034771.1	Vertebrata;Gnathostomata;Chondrichthyes;Elasmobranchii;Batoidea;Torpediniformes;Narcinidae;Narcine;Narcine brasiliensis	√	√	×	√	×	√	√	√	√	√	√	×
	Narcine entemedor	NC_025512.1	Vertebrata;Gnathostomata;Chondrichthyes;Elasmobranchii;Batoidea;Torpediniformes;Narcinidae;Narcine;Narcine entemedor	√	√	×	√	√	√	√	√	√	√	√	×
	Nebrius ferrugineus	NC_029493.1	Vertebrata;Gnathostomata;Chondrichthyes;Elasmobranchii;Selachii;Galeomorphii;Galeoidea;Orectolobiformes;Ginglymostomatidae;Nebrius;Nebrius ferrugineus	√	√	√	√	√	√	√	√	√	√	×	×
	Neotrygon kuhlii	KR019777.1	Vertebrata;Gnathostomata;Chondrichthyes;Elasmobranchii;Batoidea;Myliobatiformes;Dasyatoidea;Dasyatidae;Neotrygon;Neotrygon kuhlii	√	√	√	√	√	√	√	√	×	√	√	×
	Notoraja tobitukai	NC_030525.1	Vertebrata;Gnathostomata;Chondrichthyes;Elasmobranchii;Batoidea;Rajiformes;Arhynchobatidae;Notoraja;Notoraja tobitukai	√	√	√	√	√	√	√	√	×	√	√	×
	Odontaspis ferox	MT702386.1	Vertebrata;Gnathostomata;Chondrichthyes;Elasmobranchii;Selachii;Galeomorphii;Galeoidea;Lamniformes;Odontaspididae;Odontaspis;Odontaspis ferox	√	√	×	√	√	√	√	√	×	√	√	×
	Okamejei acutispina	KF648507.1	Vertebrata;Gnathostomata;Chondrichthyes;Elasmobranchii;Batoidea;Rajiformes;Rajidae;Okamejei;Okamejei acutispina	√	√	√	√	√	√	√	√	×	√	√	×
	Okamejei hollandi	NC_029324.1	Vertebrata;Gnathostomata;Chondrichthyes;Elasmobranchii;Batoidea;Rajiformes;Rajidae;Okamejei;Okamejei hollandi	√	√	√	√	√	√	√	√	×	√	√	×
	Okamejei kenojei	AY525783.1	Vertebrata;Gnathostomata;Chondrichthyes;Elasmobranchii;Batoidea;Rajiformes;Rajidae;Okamejei;Okamejei kenojei	√	√	√	√	√	√	√	√	×	√	√	×
	Okamejei meerdervoortii	KF953911.1	Vertebrata;Gnathostomata;Chondrichthyes;Elasmobranchii;Batoidea;Rajiformes;Rajidae;Okamejei;Okamejei meerdervoortii	√	√	√	√	√	√	√	√	×	√	√	×
	Orectolobus japonicus	NC_022148.1	Vertebrata;Gnathostomata;Chondrichthyes;Elasmobranchii;Selachii;Galeomorphii;Galeoidea;Orectolobiformes;Orectolobidae;Orectolobus;Orectolobus japonicus	√	√	×	√	√	√	√	√	×	√	√	×
	Pateobatis hortlei	NC_027497.1	Vertebrata;Gnathostomata;Chondrichthyes;Elasmobranchii;Batoidea;Myliobatiformes;Dasyatoidea;Dasyatidae;Pateobatis;Pateobatis hortlei	√	√	√	√	√	√	√	√	×	√	√	×
	Pateobatis jenkinsii	NC_030271.1	Vertebrata;Gnathostomata;Chondrichthyes;Elasmobranchii;Batoidea;Myliobatiformes;Dasyatoidea;Dasyatidae;Pateobatis;Pateobatis jenkinsii	√	√	√	√	√	√	√	√	×	√	√	×
	Pavoraja nitida	NC_024599.1	Vertebrata;Gnathostomata;Chondrichthyes;Elasmobranchii;Batoidea;Rajiformes;Arhynchobatidae;Pavoraja;Pavoraja nitida	√	√	√	√	√	√	√	√	×	√	√	×
	Plesiobatis daviesi	AY597334.1	Vertebrata;Gnathostomata;Chondrichthyes;Elasmobranchii;Batoidea;Myliobatiformes;Urolophoidea;Plesiobatidae;Plesiobatis;Plesiobatis daviesi	√	√	√	√	√	√	√	√	×	√	√	×
	Poroderma pantherinum	NC_043830.1	Vertebrata;Gnathostomata;Chondrichthyes;Elasmobranchii;Selachii;Galeomorphii;Galeoidea;Carcharhiniformes;Scyliorhinidae;Poroderma;Poroderma pantherinum	√	√	√	√	√	√	√	√	×	√	√	×
	Potamotrygon magdalenae	NC_036041.1	Vertebrata;Gnathostomata;Chondrichthyes;Elasmobranchii;Batoidea;Myliobatiformes;Dasyatoidea;Potamotrygonidae;Potamotrygon;Potamotrygon magdalenae	√	√	√	√	×	√	√	√	×	√	√	×
	Potamotrygon motoro	NC_023116.1	Vertebrata;Gnathostomata;Chondrichthyes;Elasmobranchii;Batoidea;Myliobatiformes;Dasyatoidea;Potamotrygonidae;Potamotrygon;Potamotrygon motoro	√	√	√	√	×	√	√	√	×	√	√	×
	Prionace glauca	NC_022819.1	Vertebrata;Gnathostomata;Chondrichthyes;Elasmobranchii;Selachii;Galeomorphii;Galeoidea;Carcharhiniformes;Carcharhinidae;Prionace;Prionace glauca	√	√	√	√	√	√	√	√	×	√	√	×
	Pristiophorus japonicus	NC_024110.1	Vertebrata;Gnathostomata;Chondrichthyes;Elasmobranchii;Selachii;Squalomorphii;Pristiophoriformes;Pristiophoridae;Pristiophorus;Pristiophorus japonicus	√	√	√	√	√	√	√	√	×	√	√	×
	Pristis clavata	NC_022821.1	Vertebrata;Gnathostomata;Chondrichthyes;Elasmobranchii;Batoidea;Rhinopristiformes;Pristidae;Pristis;Pristis clavata	√	√	√	√	√	√	√	√	×	√	√	×
	Pristis pectinata	MF682494.1	Vertebrata;Gnathostomata;Chondrichthyes;Elasmobranchii;Batoidea;Rhinopristiformes;Pristidae;Pristis;Pristis pectinata	√	√	√	√	√	√	√	√	×	√	√	×
	Pristis pristis	NC_039438.1	Vertebrata;Gnathostomata;Chondrichthyes;Elasmobranchii;Batoidea;Rhinopristiformes;Pristidae;Pristis;Pristis pristis	√	√	√	√	√	√	√	√	×	√	√	×
	Proscyllium habereri	NC_030216.1	Vertebrata;Gnathostomata;Chondrichthyes;Elasmobranchii;Selachii;Galeomorphii;Galeoidea;Carcharhiniformes;Proscylliidae;Proscyllium;Proscyllium habereri	√	√	√	√	√	√	√	√	×	√	×	×
	Protopterus aethiopicus	NC_014764.2	Vertebrata;Gnathostomata;Teleostomi;Euteleostomi;Sarcopterygii;Dipnotetrapodomorpha;Dipnomorpha;Ceratodontae;Ceratodontiformes;Lepidosirenoidei;Protopteridae;Protopterus;Protopterus aethiopicus	√	√	√	√	×	√	√	√	√	√	√	×
	Pseudocarcharias kamoharai	NC_026216.1	Vertebrata;Gnathostomata;Chondrichthyes;Elasmobranchii;Selachii;Galeomorphii;Galeoidea;Lamniformes;Pseudocarchariidae;Pseudocarcharias;Pseudocarcharias kamoharai	√	√	×	√	√	√	√	√	×	√	√	×
	Pteroplatytrygon violacea	NC_024570.1	Vertebrata;Gnathostomata;Chondrichthyes;Elasmobranchii;Batoidea;Myliobatiformes;Dasyatoidea;Dasyatidae;Pteroplatytrygon;Pteroplatytrygon violacea	√	√	√	√	√	√	√	√	×	√	√	×
	Raja asterias	NC_037970.1	Vertebrata;Gnathostomata;Chondrichthyes;Elasmobranchii;Batoidea;Rajiformes;Rajidae;Raja;Raja asterias	√	√	√	√	√	√	√	√	×	√	√	×
	Raja brachyura	MT850125.1	Vertebrata;Gnathostomata;Chondrichthyes;Elasmobranchii;Batoidea;Rajiformes;Rajidae;Raja;Raja brachyura	√	√	√	√	√	√	√	√	×	√	√	×
	Raja clavata	NC_037972.1	Vertebrata;Gnathostomata;Chondrichthyes;Elasmobranchii;Batoidea;Rajiformes;Rajidae;Raja;Raja clavata	√	√	√	√	√	√	√	√	×	√	√	×
	Raja miraletus	NC_037973.1	Vertebrata;Gnathostomata;Chondrichthyes;Elasmobranchii;Batoidea;Rajiformes;Rajidae;Raja;Raja miraletus	√	√	√	√	√	√	√	√	×	√	√	×
	Raja polystigma	NC_037971.1	Vertebrata;Gnathostomata;Chondrichthyes;Elasmobranchii;Batoidea;Rajiformes;Rajidae;Raja;Raja polystigma	√	√	√	√	√	√	√	√	×	√	√	×
	Raja pulchra	MH899131.1	Vertebrata;Gnathostomata;Chondrichthyes;Elasmobranchii;Batoidea;Rajiformes;Rajidae;Beringraja;Beringraja pulchra	√	√	√	√	√	√	√	√	×	√	√	×
	Raja rhina	KC914434.1	Vertebrata;Gnathostomata;Chondrichthyes;Elasmobranchii;Batoidea;Rajiformes;Rajidae;Raja;Raja rhina	√	√	√	√	√	√	√	√	×	√	√	×
	Rhina ancylostoma	NC_030215.1	Vertebrata;Gnathostomata;Chondrichthyes;Elasmobranchii;Batoidea;Rhinopristiformes;Rhinidae;Rhina;Rhina ancylostoma	√	√	√	√	√	√	√	√	√	√	√	×
	Rhincodon typus	MF872726.1	Vertebrata;Gnathostomata;Chondrichthyes;Elasmobranchii;Selachii;Galeomorphii;Galeoidea;Orectolobiformes;Rhincodontidae;Rhincodon;Rhincodon typus	√	√	√	√	√	√	√	√	×	√	√	×
	Rhinobatos hynnicephalus	NC_022841.1	Vertebrata;Gnathostomata;Chondrichthyes;Elasmobranchii;Batoidea;Rhinopristiformes;Rhinobatidae;Rhinobatos;Rhinobatos hynnicephalus	√	√	√	√	√	√	√	√	×	√	√	×
	Rhinobatos schlegelii	NC_023951.1	Vertebrata;Gnathostomata;Chondrichthyes;Elasmobranchii;Batoidea;Rhinopristiformes;Rhinobatidae;Rhinobatos;Rhinobatos schlegelii	√	√	√	√	√	√	√	√	×	√	√	×
	Rhinochimaera pacifica	HM147141.1	Vertebrata;Gnathostomata;Chondrichthyes;Holocephali;Chimaeriformes;Rhinochimaeridae;Rhinochimaera;Rhinochimaera pacifica	√	√	×	√	√	√	√	√	×	√	√	×
	Rhizoprionodon acutus	NC_046016.1	Vertebrata;Gnathostomata;Chondrichthyes;Elasmobranchii;Selachii;Galeomorphii;Galeoidea;Carcharhiniformes;Carcharhinidae;Rhizoprionodon;Rhizoprionodon acutus	√	√	√	√	√	√	√	√	×	√	√	×
	Rhynchobatus australiae	NC_030254.1	Vertebrata;Gnathostomata;Chondrichthyes;Elasmobranchii;Batoidea;Rhinopristiformes;Rhynchobatidae;Rhynchobatus;Rhynchobatus australiae	√	√	√	√	√	√	√	√	×	√	√	×
	Rhynchobatus laevis	NC_047241.1	Vertebrata;Gnathostomata;Chondrichthyes;Elasmobranchii;Batoidea;Rhinopristiformes;Rhynchobatidae;Rhynchobatus;Rhynchobatus laevis	√	√	√	√	√	√	√	√	×	√	√	×
	Scoliodon laticaudus	NC_042504.1	Vertebrata;Gnathostomata;Chondrichthyes;Elasmobranchii;Selachii;Galeomorphii;Galeoidea;Carcharhiniformes;Carcharhinidae;Scoliodon;Scoliodon laticaudus	√	√	√	√	√	√	√	√	×	√	√	×
	Scoliodon macrorhynchos	NC_018052.1	Vertebrata;Gnathostomata;Chondrichthyes;Elasmobranchii;Selachii;Galeomorphii;Galeoidea;Carcharhiniformes;Carcharhinidae;Scoliodon;Scoliodon macrorhynchos	√	√	√	√	√	√	√	√	×	√	√	×
	Scyliorhinus canicula	NC_001950.1	Vertebrata;Gnathostomata;Chondrichthyes;Elasmobranchii;Selachii;Galeomorphii;Galeoidea;Carcharhiniformes;Scyliorhinidae;Scyliorhinus;Scyliorhinus canicula	√	√	√	√	√	√	√	√	×	√	√	×
	Scyliorhinus torazame	AP019520.1	Vertebrata;Gnathostomata;Chondrichthyes;Elasmobranchii;Selachii;Galeomorphii;Galeoidea;Carcharhiniformes;Scyliorhinidae;Scyliorhinus;Scyliorhinus torazame	√	√	√	√	√	√	√	√	×	√	√	×
	Sinobatis borneensis	NC_030328.1	Vertebrata;Gnathostomata;Chondrichthyes;Elasmobranchii;Batoidea;Rajiformes;Anacanthobatidae;Sinobatis;Sinobatis borneensis	√	√	√	√	√	√	√	√	×	√	√	×
	Somniosus microcephalus	NC_049864.1	Vertebrata;Gnathostomata;Chondrichthyes;Elasmobranchii;Selachii;Squalomorphii;Squaliformes;Somniosidae;Somniosus;Somniosus microcephalus	√	√	√	√	√	√	√	√	×	√	×	×
	Sphyrna lewini	NC_022679.1	Vertebrata;Gnathostomata;Chondrichthyes;Elasmobranchii;Selachii;Galeomorphii;Galeoidea;Carcharhiniformes;Carcharhinidae;Sphyrna;Sphyrna lewini	√	√	√	√	√	√	√	√	×	√	√	×
	Sphyrna mokarran	NC_035491.1	Vertebrata;Gnathostomata;Chondrichthyes;Elasmobranchii;Selachii;Galeomorphii;Galeoidea;Carcharhiniformes;Carcharhinidae;Sphyrna;Sphyrna mokarran	√	√	√	√	√	√	√	√	×	√	√	×
	Sphyrna tiburo	NC_028508.1	Vertebrata;Gnathostomata;Chondrichthyes;Elasmobranchii;Selachii;Galeomorphii;Galeoidea;Carcharhiniformes;Carcharhinidae;Sphyrna;Sphyrna tiburo	√	√	√	√	√	√	√	√	×	√	×	×
	Sphyrna zygaena	MF983539.1	Vertebrata;Gnathostomata;Chondrichthyes;Elasmobranchii;Selachii;Galeomorphii;Galeoidea;Carcharhiniformes;Carcharhinidae;Sphyrna;Sphyrna zygaena	√	√	√	√	√	√	√	√	×	√	√	×
	Squaliolus aliae	NC_031508.1	Vertebrata;Gnathostomata;Chondrichthyes;Elasmobranchii;Selachii;Squalomorphii;Squaliformes;Dalatiidae;Squaliolus;Squaliolus aliae	√	√	√	√	√	√	√	√	×	√	√	×
	Squalus acanthias	NC_002012.1	Vertebrata;Gnathostomata;Chondrichthyes;Elasmobranchii;Selachii;Squalomorphii;Squaliformes;Squalidae;Squalus;Squalus acanthias	√	√	√	√	√	√	√	√	×	√	√	×
	Squalus brevirostris	NC_034748.1	Vertebrata;Gnathostomata;Chondrichthyes;Elasmobranchii;Selachii;Squalomorphii;Squaliformes;Squalidae;Squalus;Squalus brevirostris	√	√	√	√	√	√	√	√	×	√	√	×
	Squalus formosus	NC_031818.1	Vertebrata;Gnathostomata;Chondrichthyes;Elasmobranchii;Selachii;Squalomorphii;Squaliformes;Squalidae;Squalus;Squalus formosus	√	√	√	√	√	√	√	√	×	√	√	×
	Squalus montalbani	NC_028537.1	Vertebrata;Gnathostomata;Chondrichthyes;Elasmobranchii;Selachii;Squalomorphii;Squaliformes;Squalidae;Squalus;Squalus montalbani	√	√	√	√	√	√	√	√	×	√	√	×
	Squatina dumeril	NC_048468.1	Vertebrata;Gnathostomata;Chondrichthyes;Elasmobranchii;Selachii;Squalomorphii;Squatiniformes;Squatinidae;Squatina;Squatina dumeril	√	√	√	√	√	√	√	√	×	√	√	×
	Squatina formosa	NC_025328.1	Vertebrata;Gnathostomata;Chondrichthyes;Elasmobranchii;Selachii;Squalomorphii;Squatiniformes;Squatinidae;Squatina;Squatina formosa	√	√	√	√	√	√	√	√	×	√	√	×
	Squatina japonica	NC_024276.1	Vertebrata;Gnathostomata;Chondrichthyes;Elasmobranchii;Selachii;Squalomorphii;Squatiniformes;Squatinidae;Squatina;Squatina japonica	√	√	√	√	√	√	√	√	×	√	√	×
	Squatina nebulosa	NC_025578.1	Vertebrata;Gnathostomata;Chondrichthyes;Elasmobranchii;Selachii;Squalomorphii;Squatiniformes;Squatinidae;Squatina;Squatina nebulosa	√	√	√	√	√	√	√	√	×	√	√	×
	Squatina squatina	MG029174.1	Vertebrata;Gnathostomata;Chondrichthyes;Elasmobranchii;Selachii;Squalomorphii;Squatiniformes;Squatinidae;Squatina;Squatina squatina	√	√	√	√	√	√	√	√	×	√	√	×
	Stegostoma fasciatum	NC_029480.1	Vertebrata;Gnathostomata;Chondrichthyes;Elasmobranchii;Selachii;Galeomorphii;Galeoidea;Orectolobiformes;Stegostomatidae;Stegostoma;Stegostoma fasciatum	√	√	√	√	√	√	√	√	√	√	×	×
	Taeniura lymma	NC_026210.1	Vertebrata;Gnathostomata;Chondrichthyes;Elasmobranchii;Batoidea;Myliobatiformes;Dasyatoidea;Potamotrygonidae;Taeniura;Taeniura lymma	√	√	√	√	√	√	√	√	×	√	√	×
	Taeniura meyeni	NC_019641.1	Vertebrata;Gnathostomata;Chondrichthyes;Elasmobranchii;Batoidea;Myliobatiformes;Dasyatoidea;Potamotrygonidae;Taeniura;Taeniura meyeni	√	√	√	√	√	√	√	√	×	√	√	×
	Telatrygon zugei	NC_019643.1	Vertebrata;Gnathostomata;Chondrichthyes;Elasmobranchii;Batoidea;Myliobatiformes;Dasyatoidea;Dasyatidae;Telatrygon;Telatrygon zugei	√	√	√	√	√	√	√	√	√	√	√	×
	Triaenodon obesus	MN943497.1	Vertebrata;Gnathostomata;Chondrichthyes;Elasmobranchii;Selachii;Galeomorphii;Galeoidea;Carcharhiniformes;Carcharhinidae;Triaenodon;Triaenodon obesus	√	√	√	√	√	√	√	√	×	√	√	×
	Urogymnus granulatus	NC_023525.1	Vertebrata;Gnathostomata;Chondrichthyes;Elasmobranchii;Batoidea;Myliobatiformes;Dasyatoidea;Dasyatidae;Urogymnus;Urogymnus granulatus	√	√	√	√	√	√	√	√	×	√	√	×
	Zapteryx exasperata	NC_024937.1	Vertebrata;Gnathostomata;Chondrichthyes;Elasmobranchii;Batoidea;Rhinopristiformes;Rhinobatidae;Zapteryx;Zapteryx exasperata	√	√	√	√	√	√	√	√	×	√	√	×
Actinopterygii	Abalistes stellaris	MG515171.1	Vertebrata;Gnathostomata;Teleostomi;Euteleostomi;Actinopterygii;Actinopteri;Neopterygii;Teleostei;Osteoglossocephalai;Clupeocephala;Euteleosteomorpha;Neoteleostei;Eurypterygia;Ctenosquamata;Acanthomorphata;Euacanthomorphacea;Percomorphaceae;Eupercaria;Tetraodontiformes;Balistoidea;Balistidae;Abalistes;Abalistes stellaris	√	√	√	√	√	√	√	√	×	√	√	×
	Abbottina binhi	NC_048988.1	Vertebrata;Gnathostomata;Teleostomi;Euteleostomi;Actinopterygii;Actinopteri;Neopterygii;Teleostei;Osteoglossocephalai;Clupeocephala;Otomorpha;Ostariophysi;Otophysi;Cypriniphysae;Cypriniformes;Cyprinoidei;Gobionidae;Gobioninae;Abbottina;Abbottina binhi	√	√	√	√	√	√	√	√	√	√	√	×
	Abbottina obtusirostris	KF955012.1	Vertebrata;Gnathostomata;Teleostomi;Euteleostomi;Actinopterygii;Actinopteri;Neopterygii;Teleostei;Osteoglossocephalai;Clupeocephala;Otomorpha;Ostariophysi;Otophysi;Cypriniphysae;Cypriniformes;Cyprinoidei;Gobionidae;Gobioninae;Abbottina;Abbottina obtusirostris	√	√	√	√	√	√	√	√	√	√	×	×
	Abbottina rivularis	MK852690.1	Vertebrata;Gnathostomata;Teleostomi;Euteleostomi;Actinopterygii;Actinopteri;Neopterygii;Teleostei;Osteoglossocephalai;Clupeocephala;Otomorpha;Ostariophysi;Otophysi;Cypriniphysae;Cypriniformes;Cyprinoidei;Gobionidae;Gobioninae;Abbottina;Abbottina rivularis	√	√	√	√	√	√	√	√	√	√	√	×
	Ablennes hians	NC_011180.1	Vertebrata;Gnathostomata;Teleostomi;Euteleostomi;Actinopterygii;Actinopteri;Neopterygii;Teleostei;Osteoglossocephalai;Clupeocephala;Euteleosteomorpha;Neoteleostei;Eurypterygia;Ctenosquamata;Acanthomorphata;Euacanthomorphacea;Percomorphaceae;Ovalentaria;Atherinomorphae;Beloniformes;Belonoidei;Belonidae;Ablennes;Ablennes hians	√	√	√	√	√	√	√	√	×	√	√	×
	Abramis brama	MT410936.1	Vertebrata;Gnathostomata;Teleostomi;Euteleostomi;Actinopterygii;Actinopteri;Neopterygii;Teleostei;Osteoglossocephalai;Clupeocephala;Otomorpha;Ostariophysi;Otophysi;Cypriniphysae;Cypriniformes;Cyprinoidei;Leuciscidae;Leuciscinae;Abramis;Abramis brama	√	√	√	√	√	√	√	√	√	√	√	×
	Abramis brama orientalis	KC894466.1	Vertebrata;Gnathostomata;Teleostomi;Euteleostomi;Actinopterygii;Actinopteri;Neopterygii;Teleostei;Osteoglossocephalai;Clupeocephala;Otomorpha;Ostariophysi;Otophysi;Cypriniphysae;Cypriniformes;Cyprinoidei;Leuciscidae;Leuciscinae;Abramis;Abramis brama;Abramis brama orientalis	√	√	√	√	√	√	√	√	√	√	√	×
	Abudefduf bengalensis	NC_041192.1	Vertebrata;Gnathostomata;Teleostomi;Euteleostomi;Actinopterygii;Actinopteri;Neopterygii;Teleostei;Osteoglossocephalai;Clupeocephala;Euteleosteomorpha;Neoteleostei;Eurypterygia;Ctenosquamata;Acanthomorphata;Euacanthomorphacea;Percomorphaceae;Ovalentaria;Ovalentaria incertae sedis;Pomacentridae;Abudefduf;Abudefduf bengalensis	√	√	√	√	√	√	√	√	×	√	√	×
	Abudefduf vaigiensis	NC_009064.1	Vertebrata;Gnathostomata;Teleostomi;Euteleostomi;Actinopterygii;Actinopteri;Neopterygii;Teleostei;Osteoglossocephalai;Clupeocephala;Euteleosteomorpha;Neoteleostei;Eurypterygia;Ctenosquamata;Acanthomorphata;Euacanthomorphacea;Percomorphaceae;Ovalentaria;Ovalentaria incertae sedis;Pomacentridae;Abudefduf;Abudefduf vaigiensis	√	√	√	√	√	√	√	√	×	√	√	×
	Acanthaluteres brownii	NC_011947.1	Vertebrata;Gnathostomata;Teleostomi;Euteleostomi;Actinopterygii;Actinopteri;Neopterygii;Teleostei;Osteoglossocephalai;Clupeocephala;Euteleosteomorpha;Neoteleostei;Eurypterygia;Ctenosquamata;Acanthomorphata;Euacanthomorphacea;Percomorphaceae;Eupercaria;Tetraodontiformes;Balistoidea;Monacanthidae;Acanthaluteres;Acanthaluteres brownii	√	√	√	√	√	√	√	√	×	√	√	×
	Acanthaphritis unoorum	NC_034344.1	Vertebrata;Gnathostomata;Teleostomi;Euteleostomi;Actinopterygii;Actinopteri;Neopterygii;Teleostei;Osteoglossocephalai;Clupeocephala;Euteleosteomorpha;Neoteleostei;Eurypterygia;Ctenosquamata;Acanthomorphata;Euacanthomorphacea;Percomorphaceae;Eupercaria;Pempheriformes;Percophidae;Hemerocoetinae;Acanthaphritis;Acanthaphritis unoorum	√	√	√	√	√	√	√	√	×	√	√	×
	Acanthocepola krusensternii	NC_034333.1	Vertebrata;Gnathostomata;Teleostomi;Euteleostomi;Actinopterygii;Actinopteri;Neopterygii;Teleostei;Osteoglossocephalai;Clupeocephala;Euteleosteomorpha;Neoteleostei;Eurypterygia;Ctenosquamata;Acanthomorphata;Euacanthomorphacea;Percomorphaceae;Eupercaria;Priacanthiformes;Cepolidae;Acanthocepola;Acanthocepola krusensternii	√	√	√	√	√	√	√	√	×	√	√	×
	Acanthochromis polyacanthus	MN998653.1	Vertebrata;Gnathostomata;Teleostomi;Euteleostomi;Actinopterygii;Actinopteri;Neopterygii;Teleostei;Osteoglossocephalai;Clupeocephala;Euteleosteomorpha;Neoteleostei;Eurypterygia;Ctenosquamata;Acanthomorphata;Euacanthomorphacea;Percomorphaceae;Ovalentaria;Ovalentaria incertae sedis;Pomacentridae;Acanthochromis;Acanthochromis polyacanthus	√	√	√	√	√	√	√	√	×	√	√	×
	Acanthocobitis botia	NC_033958.1	Vertebrata;Gnathostomata;Teleostomi;Euteleostomi;Actinopterygii;Actinopteri;Neopterygii;Teleostei;Osteoglossocephalai;Clupeocephala;Otomorpha;Ostariophysi;Otophysi;Cypriniphysae;Cypriniformes;Cobitoidei;Nemacheilidae;Acanthocobitis;Acanthocobitis botia	√	√	√	√	√	√	√	√	√	√	√	×
	Acanthocobitis zonalternans	NC_033959.1	Vertebrata;Gnathostomata;Teleostomi;Euteleostomi;Actinopterygii;Actinopteri;Neopterygii;Teleostei;Osteoglossocephalai;Clupeocephala;Otomorpha;Ostariophysi;Otophysi;Cypriniphysae;Cypriniformes;Cobitoidei;Nemacheilidae;Acanthocobitis;Acanthocobitis zonalternans	√	√	√	√	√	√	√	√	√	√	√	×
	Acanthogobio guentheri	MF787799.1	Vertebrata;Gnathostomata;Teleostomi;Euteleostomi;Actinopterygii;Actinopteri;Neopterygii;Teleostei;Osteoglossocephalai;Clupeocephala;Otomorpha;Ostariophysi;Otophysi;Cypriniphysae;Cypriniformes;Cyprinoidei;Gobionidae;Gobioninae;Acanthogobio;Acanthogobio guentheri	√	√	√	√	√	√	√	√	√	√	√	×
	Acanthogobius hasta	MK253669.1	Vertebrata;Gnathostomata;Teleostomi;Euteleostomi;Actinopterygii;Actinopteri;Neopterygii;Teleostei;Osteoglossocephalai;Clupeocephala;Euteleosteomorpha;Neoteleostei;Eurypterygia;Ctenosquamata;Acanthomorphata;Euacanthomorphacea;Percomorphaceae;Gobiaria;Gobiiformes;Gobioidei;Gobiidae;Gobionellinae;Acanthogobius;Acanthogobius hasta	√	√	√	√	√	√	√	√	×	√	×	×
	Acanthogobius stigmothonus	MT258987.1	Vertebrata;Gnathostomata;Teleostomi;Euteleostomi;Actinopterygii;Actinopteri;Neopterygii;Teleostei;Osteoglossocephalai;Clupeocephala;Euteleosteomorpha;Neoteleostei;Eurypterygia;Ctenosquamata;Acanthomorphata;Euacanthomorphacea;Percomorphaceae;Gobiaria;Gobiiformes;Gobioidei;Gobiidae;Gobionellinae;Acanthogobius;Acanthogobius stigmothonus	√	√	√	√	√	√	√	√	×	√	√	×
	Acanthopagrus latus	EF506764.1	Vertebrata;Gnathostomata;Teleostomi;Euteleostomi;Actinopterygii;Actinopteri;Neopterygii;Teleostei;Osteoglossocephalai;Clupeocephala;Euteleosteomorpha;Neoteleostei;Eurypterygia;Ctenosquamata;Acanthomorphata;Euacanthomorphacea;Percomorphaceae;Eupercaria;Spariformes;Sparidae;Acanthopagrus;Acanthopagrus latus	√	√	√	√	√	√	√	√	√	√	√	×
	Acanthopagrus schlegelii	KT805958.1	Vertebrata;Gnathostomata;Teleostomi;Euteleostomi;Actinopterygii;Actinopteri;Neopterygii;Teleostei;Osteoglossocephalai;Clupeocephala;Euteleosteomorpha;Neoteleostei;Eurypterygia;Ctenosquamata;Acanthomorphata;Euacanthomorphacea;Percomorphaceae;Eupercaria;Spariformes;Sparidae;Acanthopagrus;Acanthopagrus schlegelii	√	√	√	√	√	√	√	√	√	√	√	×
	Acanthopagrus schlegelii x Pagrus major	MH363710.1	Vertebrata;Gnathostomata;Teleostomi;Euteleostomi;Actinopterygii;Actinopteri;Neopterygii;Teleostei;Osteoglossocephalai;Clupeocephala;Euteleosteomorpha;Neoteleostei;Eurypterygia;Ctenosquamata;Acanthomorphata;Euacanthomorphacea;Percomorphaceae;Eupercaria;Spariformes;Sparidae;unclassified Sparidae;Acanthopagrus schlegelii x Pagrus major	√	√	√	√	√	√	√	√	√	√	√	×
	Acanthurus leucosternon	EU136032.1	Vertebrata;Gnathostomata;Teleostomi;Euteleostomi;Actinopterygii;Actinopteri;Neopterygii;Teleostei;Osteoglossocephalai;Clupeocephala;Euteleosteomorpha;Neoteleostei;Eurypterygia;Ctenosquamata;Acanthomorphata;Euacanthomorphacea;Percomorphaceae;Eupercaria;Acanthuriformes;Acanthuridae;Acanthurinae;Acanthurus;Acanthurus leucosternon	√	√	√	√	√	√	√	√	×	√	√	×
	Acanthurus lineatus	NC_010108.2	Vertebrata;Gnathostomata;Teleostomi;Euteleostomi;Actinopterygii;Actinopteri;Neopterygii;Teleostei;Osteoglossocephalai;Clupeocephala;Euteleosteomorpha;Neoteleostei;Eurypterygia;Ctenosquamata;Acanthomorphata;Euacanthomorphacea;Percomorphaceae;Eupercaria;Acanthuriformes;Acanthuridae;Acanthurinae;Acanthurus;Acanthurus lineatus	√	√	√	√	√	√	√	√	×	√	√	×
	Acantopsis choirorhynchos	NC_008669.1	Vertebrata;Gnathostomata;Teleostomi;Euteleostomi;Actinopterygii;Actinopteri;Neopterygii;Teleostei;Osteoglossocephalai;Clupeocephala;Otomorpha;Ostariophysi;Otophysi;Cypriniphysae;Cypriniformes;Cobitoidei;Cobitidae;Cobitinae;Acantopsis;Acantopsis choirorhynchos	√	√	√	√	√	√	√	√	√	√	√	×
	Acentrogobius caninus	NC_041193.1	Vertebrata;Gnathostomata;Teleostomi;Euteleostomi;Actinopterygii;Actinopteri;Neopterygii;Teleostei;Osteoglossocephalai;Clupeocephala;Euteleosteomorpha;Neoteleostei;Eurypterygia;Ctenosquamata;Acanthomorphata;Euacanthomorphacea;Percomorphaceae;Gobiaria;Gobiiformes;Gobioidei;Gobiidae;Gobiinae;Acentrogobius;Acentrogobius caninus	√	√	√	√	√	√	√	√	√	√	√	×
	Acentrogobius chlorostigmatoides	NC_020346.1	Vertebrata;Gnathostomata;Teleostomi;Euteleostomi;Actinopterygii;Actinopteri;Neopterygii;Teleostei;Osteoglossocephalai;Clupeocephala;Euteleosteomorpha;Neoteleostei;Eurypterygia;Ctenosquamata;Acanthomorphata;Euacanthomorphacea;Percomorphaceae;Gobiaria;Gobiiformes;Gobioidei;Gobiidae;Gobiinae;Acentrogobius;Acentrogobius chlorostigmatoides	√	√	√	√	√	√	√	√	√	√	√	×
	Acentrogobius pflaumii	NC_018064.1	Vertebrata;Gnathostomata;Teleostomi;Euteleostomi;Actinopterygii;Actinopteri;Neopterygii;Teleostei;Osteoglossocephalai;Clupeocephala;Euteleosteomorpha;Neoteleostei;Eurypterygia;Ctenosquamata;Acanthomorphata;Euacanthomorphacea;Percomorphaceae;Gobiaria;Gobiiformes;Gobioidei;Gobiidae;Gobiinae;Acentrogobius;Acentrogobius pflaumii	√	√	√	√	√	√	√	√	×	√	√	×
	Acestrorhynchus sp. NM-2010	NC_015755.1	Vertebrata;Gnathostomata;Teleostomi;Euteleostomi;Actinopterygii;Actinopteri;Neopterygii;Teleostei;Osteoglossocephalai;Clupeocephala;Otomorpha;Ostariophysi;Otophysi;Characiphysae;Characiformes;Characoidei;Acestrorhynchidae;Acestrorhynchus;unclassified Acestrorhynchus;Acestrorhynchus sp. NM-2010	√	√	√	√	√	√	√	√	×	√	√	×
	Acheilognathus barbatus	NC_026872.1	Vertebrata;Gnathostomata;Teleostomi;Euteleostomi;Actinopterygii;Actinopteri;Neopterygii;Teleostei;Osteoglossocephalai;Clupeocephala;Otomorpha;Ostariophysi;Otophysi;Cypriniphysae;Cypriniformes;Cyprinoidei;Acheilognathidae;Acheilognathus;Acheilognathus barbatus	√	√	√	√	√	√	√	√	√	√	√	×
	Acheilognathus chankaensis	MN683735.1	Vertebrata;Gnathostomata;Teleostomi;Euteleostomi;Actinopterygii;Actinopteri;Neopterygii;Teleostei;Osteoglossocephalai;Clupeocephala;Otomorpha;Ostariophysi;Otophysi;Cypriniphysae;Cypriniformes;Cyprinoidei;Acheilognathidae;Acheilognathus;Acheilognathus chankaensis	√	√	√	√	√	√	√	√	√	√	√	×
	Acheilognathus gracilis	NC_028416.1	Vertebrata;Gnathostomata;Teleostomi;Euteleostomi;Actinopterygii;Actinopteri;Neopterygii;Teleostei;Osteoglossocephalai;Clupeocephala;Otomorpha;Ostariophysi;Otophysi;Cypriniphysae;Cypriniformes;Cyprinoidei;Acheilognathidae;Acheilognathus;Acheilognathus gracilis	√	√	√	√	√	√	√	√	×	√	√	×
	Acheilognathus imberbis	KP015738.1	Vertebrata;Gnathostomata;Teleostomi;Euteleostomi;Actinopterygii;Actinopteri;Neopterygii;Teleostei;Osteoglossocephalai;Clupeocephala;Otomorpha;Ostariophysi;Otophysi;Cypriniphysae;Cypriniformes;Cyprinoidei;Acheilognathidae;Acheilognathus;Acheilognathus imberbis	√	√	√	√	√	√	√	√	√	√	√	×
	Acheilognathus intermedia	NC_013705.1	Vertebrata;Gnathostomata;Teleostomi;Euteleostomi;Actinopterygii;Actinopteri;Neopterygii;Teleostei;Osteoglossocephalai;Clupeocephala;Otomorpha;Ostariophysi;Otophysi;Cypriniphysae;Cypriniformes;Cyprinoidei;Acheilognathidae;Acheilognathus;Acheilognathus intermedia	√	√	√	√	√	√	√	√	×	√	√	×
	Acheilognathus macropterus	KJ499466.1	Vertebrata;Gnathostomata;Teleostomi;Euteleostomi;Actinopterygii;Actinopteri;Neopterygii;Teleostei;Osteoglossocephalai;Clupeocephala;Otomorpha;Ostariophysi;Otophysi;Cypriniphysae;Cypriniformes;Cyprinoidei;Acheilognathidae;Acheilognathus;Acheilognathus macropterus	√	√	√	√	√	√	√	√	√	√	√	×
	Acheilognathus meridianus	NC_031152.1	Vertebrata;Gnathostomata;Teleostomi;Euteleostomi;Actinopterygii;Actinopteri;Neopterygii;Teleostei;Osteoglossocephalai;Clupeocephala;Otomorpha;Ostariophysi;Otophysi;Cypriniphysae;Cypriniformes;Cyprinoidei;Acheilognathidae;Acheilognathus;Acheilognathus meridianus	√	√	√	√	√	√	√	√	√	√	×	×
	Acheilognathus omeiensis	NC_037404.1	Vertebrata;Gnathostomata;Teleostomi;Euteleostomi;Actinopterygii;Actinopteri;Neopterygii;Teleostei;Osteoglossocephalai;Clupeocephala;Otomorpha;Ostariophysi;Otophysi;Cypriniphysae;Cypriniformes;Cyprinoidei;Acheilognathidae;Acheilognathus;Acheilognathus omeiensis	√	√	√	√	√	√	√	√	√	√	√	×
	Acheilognathus rhombeus	NC_028433.1	Vertebrata;Gnathostomata;Teleostomi;Euteleostomi;Actinopterygii;Actinopteri;Neopterygii;Teleostei;Osteoglossocephalai;Clupeocephala;Otomorpha;Ostariophysi;Otophysi;Cypriniphysae;Cypriniformes;Cyprinoidei;Acheilognathidae;Acheilognathus;Acheilognathus rhombeus	√	√	√	√	√	√	√	√	√	√	√	×
	Acheilognathus signifer	MG800786.1	Vertebrata;Gnathostomata;Teleostomi;Euteleostomi;Actinopterygii;Actinopteri;Neopterygii;Teleostei;Osteoglossocephalai;Clupeocephala;Otomorpha;Ostariophysi;Otophysi;Cypriniphysae;Cypriniformes;Cyprinoidei;Acheilognathidae;Acheilognathus;Acheilognathus signifer	√	√	√	√	√	√	√	√	√	√	√	×
	Acheilognathus somjinensis	NC_014882.1	Vertebrata;Gnathostomata;Teleostomi;Euteleostomi;Actinopterygii;Actinopteri;Neopterygii;Teleostei;Osteoglossocephalai;Clupeocephala;Otomorpha;Ostariophysi;Otophysi;Cypriniphysae;Cypriniformes;Cyprinoidei;Acheilognathidae;Acheilognathus;Acheilognathus somjinensis	√	√	√	√	√	√	√	√	√	√	√	×
	Acheilognathus tonkinensis	NC_042407.1	Vertebrata;Gnathostomata;Teleostomi;Euteleostomi;Actinopterygii;Actinopteri;Neopterygii;Teleostei;Osteoglossocephalai;Clupeocephala;Otomorpha;Ostariophysi;Otophysi;Cypriniphysae;Cypriniformes;Cyprinoidei;Acheilognathidae;Acheilognathus;Acheilognathus tonkinensis	√	√	√	√	√	√	√	√	√	√	×	×
	Acheilognathus typus	NC_008668.1	Vertebrata;Gnathostomata;Teleostomi;Euteleostomi;Actinopterygii;Actinopteri;Neopterygii;Teleostei;Osteoglossocephalai;Clupeocephala;Otomorpha;Ostariophysi;Otophysi;Cypriniphysae;Cypriniformes;Cyprinoidei;Acheilognathidae;Acheilognathus;Acheilognathus typus	√	√	√	√	√	√	√	√	√	√	√	×
	Acheilognathus yamatsutae	NC_013712.1	Vertebrata;Gnathostomata;Teleostomi;Euteleostomi;Actinopterygii;Actinopteri;Neopterygii;Teleostei;Osteoglossocephalai;Clupeocephala;Otomorpha;Ostariophysi;Otophysi;Cypriniphysae;Cypriniformes;Cyprinoidei;Acheilognathidae;Acheilognathus;Acheilognathus yamatsutae	√	√	√	√	√	√	√	√	√	√	×	×
	Achirus lineatus	NC_023768.1	Vertebrata;Gnathostomata;Teleostomi;Euteleostomi;Actinopterygii;Actinopteri;Neopterygii;Teleostei;Osteoglossocephalai;Clupeocephala;Euteleosteomorpha;Neoteleostei;Eurypterygia;Ctenosquamata;Acanthomorphata;Euacanthomorphacea;Percomorphaceae;Carangaria;Pleuronectiformes;Pleuronectoidei;Achiridae;Achirus;Achirus lineatus	√	√	√	√	√	√	√	√	×	√	×	×
	Acipenser baerii	NC_017603.1	Vertebrata;Gnathostomata;Teleostomi;Euteleostomi;Actinopterygii;Actinopteri;Chondrostei;Acipenseriformes;Acipenseroidei;Acipenseridae;Acipenserinae;Acipenserini;Acipenser;Acipenser baerii	√	√	√	√	√	√	√	√	√	√	√	×
	Acipenser brevirostrum	KX817311.2	Vertebrata;Gnathostomata;Teleostomi;Euteleostomi;Actinopterygii;Actinopteri;Chondrostei;Acipenseriformes;Acipenseroidei;Acipenseridae;Acipenserinae;Acipenserini;Acipenser;Acipenser brevirostrum	√	√	√	√	√	√	√	√	√	√	√	×
	Acipenser dabryanus	AY510085.1	Vertebrata;Gnathostomata;Teleostomi;Euteleostomi;Actinopterygii;Actinopteri;Chondrostei;Acipenseriformes;Acipenseroidei;Acipenseridae;Acipenserinae;Acipenserini;Acipenser;Acipenser dabryanus	√	√	√	√	√	√	√	√	√	√	√	×
	Acipenser dabryanus x Acipenser schrenckii	NC_036420.1	Vertebrata;Gnathostomata;Teleostomi;Euteleostomi;Actinopterygii;Actinopteri;Chondrostei;Acipenseriformes;Acipenseroidei;Acipenseridae;Acipenserinae;Acipenserini;Acipenser;Acipenser dabryanus x Acipenser schrenckii	√	√	√	√	√	√	√	√	√	√	√	×
	Acipenser fulvescens	KU985083.2	Vertebrata;Gnathostomata;Teleostomi;Euteleostomi;Actinopterygii;Actinopteri;Chondrostei;Acipenseriformes;Acipenseroidei;Acipenseridae;Acipenserinae;Acipenserini;Acipenser;Acipenser fulvescens	√	√	√	√	√	√	√	√	√	√	√	×
	Acipenser gueldenstaedtii	FJ392605.1	Vertebrata;Gnathostomata;Teleostomi;Euteleostomi;Actinopterygii;Actinopteri;Chondrostei;Acipenseriformes;Acipenseroidei;Acipenseridae;Acipenserinae;Acipenserini;Acipenser;Acipenser gueldenstaedtii	√	√	√	√	√	√	√	√	√	√	√	×
	Acipenser gueldenstaedtii x Acipenser baerii	NC_036675.1	Vertebrata;Gnathostomata;Teleostomi;Euteleostomi;Actinopterygii;Actinopteri;Chondrostei;Acipenseriformes;Acipenseroidei;Acipenseridae;Acipenserinae;Acipenserini;Acipenser;Acipenser gueldenstaedtii x Acipenser baerii	√	√	√	√	√	√	√	√	√	√	√	×
	Acipenser medirostris	NC_028405.1	Vertebrata;Gnathostomata;Teleostomi;Euteleostomi;Actinopterygii;Actinopteri;Chondrostei;Acipenseriformes;Acipenseroidei;Acipenseridae;Acipenserinae;Acipenserini;Acipenser;Acipenser medirostris	√	√	√	√	√	√	√	√	√	√	√	×
	Acipenser mikadoi	KX276658.1	Vertebrata;Gnathostomata;Teleostomi;Euteleostomi;Actinopterygii;Actinopteri;Chondrostei;Acipenseriformes;Acipenseroidei;Acipenseridae;Acipenserinae;Acipenserini;Acipenser;Acipenser mikadoi	√	√	√	√	√	√	√	√	√	√	√	×
	Acipenser nudiventris	NC_030344.1	Vertebrata;Gnathostomata;Teleostomi;Euteleostomi;Actinopterygii;Actinopteri;Chondrostei;Acipenseriformes;Acipenseroidei;Acipenseridae;Acipenserinae;Acipenserini;Acipenser;Acipenser nudiventris	√	√	√	√	√	√	√	√	√	√	√	×
	Acipenser oxyrinchus	MT410938.1	Vertebrata;Gnathostomata;Teleostomi;Euteleostomi;Actinopterygii;Actinopteri;Chondrostei;Acipenseriformes;Acipenseroidei;Acipenseridae;Acipenserinae;Acipenserini;Acipenser;Acipenser oxyrinchus	√	√	√	√	√	√	√	√	√	√	√	×
	Acipenser oxyrinchus desotoi	KP997218.1	Vertebrata;Gnathostomata;Teleostomi;Euteleostomi;Actinopterygii;Actinopteri;Chondrostei;Acipenseriformes;Acipenseroidei;Acipenseridae;Acipenserinae;Acipenserini;Acipenser;Acipenser oxyrinchus;Acipenser oxyrinchus desotoi	√	√	√	√	√	√	√	√	√	√	√	×
	Acipenser oxyrinchus oxyrinchus	KU985074.1	Vertebrata;Gnathostomata;Teleostomi;Euteleostomi;Actinopterygii;Actinopteri;Chondrostei;Acipenseriformes;Acipenseroidei;Acipenseridae;Acipenserinae;Acipenserini;Acipenser;Acipenser oxyrinchus;Acipenser oxyrinchus oxyrinchus	√	√	√	√	√	√	√	√	√	√	√	×
	Acipenser persicus	MK213065.2	Vertebrata;Gnathostomata;Teleostomi;Euteleostomi;Actinopterygii;Actinopteri;Chondrostei;Acipenseriformes;Acipenseroidei;Acipenseridae;Acipenserinae;Acipenserini;Acipenser;Acipenser persicus	√	√	√	√	√	√	√	√	√	√	√	×
	Acipenser ruthenus	NC_022453.1	Vertebrata;Gnathostomata;Teleostomi;Euteleostomi;Actinopterygii;Actinopteri;Chondrostei;Acipenseriformes;Acipenseroidei;Acipenseridae;Acipenserinae;Acipenserini;Acipenser;Acipenser ruthenus	√	√	√	√	√	√	√	√	√	√	√	×
	Acipenser schrenckii	KX276660.1	Vertebrata;Gnathostomata;Teleostomi;Euteleostomi;Actinopterygii;Actinopteri;Chondrostei;Acipenseriformes;Acipenseroidei;Acipenseridae;Acipenserinae;Acipenserini;Acipenser;Acipenser schrenckii	√	√	√	√	√	√	√	√	√	√	√	×
	Acipenser schrenckii x Huso dauricus	NC_027522.1	Vertebrata;Gnathostomata;Teleostomi;Euteleostomi;Actinopterygii;Actinopteri;Chondrostei;Acipenseriformes;Acipenseroidei;Acipenseridae;Acipenseridae intergeneric hybrids;Acipenser schrenckii x Huso dauricus	√	√	√	√	√	√	√	√	√	√	√	×
	Acipenser sinensis	MT276296.1	Vertebrata;Gnathostomata;Teleostomi;Euteleostomi;Actinopterygii;Actinopteri;Chondrostei;Acipenseriformes;Acipenseroidei;Acipenseridae;Acipenserinae;Acipenserini;Acipenser;Acipenser sinensis	√	√	√	√	√	√	√	√	√	√	√	×
	Acipenser sp. JNY-2013	KF668288.1	Vertebrata;Gnathostomata;Teleostomi;Euteleostomi;Actinopterygii;Actinopteri;Chondrostei;Acipenseriformes;Acipenseroidei;Acipenseridae;Acipenserinae;Acipenserini;Acipenser;unclassified Acipenser;Acipenser sp. JNY-2013	√	√	√	√	√	√	√	√	√	√	√	×
	Acipenser stellatus	NC_005795.1	Vertebrata;Gnathostomata;Teleostomi;Euteleostomi;Actinopterygii;Actinopteri;Chondrostei;Acipenseriformes;Acipenseroidei;Acipenseridae;Acipenserinae;Acipenserini;Acipenser;Acipenser stellatus	√	√	√	√	√	√	√	√	√	√	√	×
	Acipenser stellatus ssp. 'stellatus cyrensis'	MK213064.2	Vertebrata;Gnathostomata;Teleostomi;Euteleostomi;Actinopterygii;Actinopteri;Chondrostei;Acipenseriformes;Acipenseroidei;Acipenseridae;Acipenserinae;Acipenserini;Acipenser;Acipenser stellatus;unclassified Acipenser stellatus;Acipenser stellatus ssp. 'stellatus cyrensis'	×	√	√	√	√	√	√	√	√	√	√	×
	Acipenser sturio	NC_027417.1	Vertebrata;Gnathostomata;Teleostomi;Euteleostomi;Actinopterygii;Actinopteri;Chondrostei;Acipenseriformes;Acipenseroidei;Acipenseridae;Acipenserinae;Acipenserini;Acipenser;Acipenser sturio	√	√	√	√	√	√	√	√	√	√	√	×
	Acipenser transmontanus	NC_004743.1	Vertebrata;Gnathostomata;Teleostomi;Euteleostomi;Actinopterygii;Actinopteri;Chondrostei;Acipenseriformes;Acipenseroidei;Acipenseridae;Acipenserinae;Acipenserini;Acipenser;Acipenser transmontanus	√	√	√	√	√	√	√	√	√	√	√	×
	Acreichthys tomentosus	NC_011950.1	Vertebrata;Gnathostomata;Teleostomi;Euteleostomi;Actinopterygii;Actinopteri;Neopterygii;Teleostei;Osteoglossocephalai;Clupeocephala;Euteleosteomorpha;Neoteleostei;Eurypterygia;Ctenosquamata;Acanthomorphata;Euacanthomorphacea;Percomorphaceae;Eupercaria;Tetraodontiformes;Balistoidea;Monacanthidae;Acreichthys;Acreichthys tomentosus	√	√	√	√	√	√	√	√	×	√	√	×
	Acrossocheilus barbodon	NC_022184.1	Vertebrata;Gnathostomata;Teleostomi;Euteleostomi;Actinopterygii;Actinopteri;Neopterygii;Teleostei;Osteoglossocephalai;Clupeocephala;Otomorpha;Ostariophysi;Otophysi;Cypriniphysae;Cypriniformes;Cyprinoidei;Cyprinidae;Acrossocheilinae;Acrossocheilus;Acrossocheilus barbodon	√	√	√	√	√	√	√	√	√	√	√	×
	Acrossocheilus beijiangensis	KY131976.1	Vertebrata;Gnathostomata;Teleostomi;Euteleostomi;Actinopterygii;Actinopteri;Neopterygii;Teleostei;Osteoglossocephalai;Clupeocephala;Otomorpha;Ostariophysi;Otophysi;Cypriniphysae;Cypriniformes;Cyprinoidei;Cyprinidae;Acrossocheilinae;Acrossocheilus;Acrossocheilus beijiangensis	√	√	√	√	√	√	√	√	√	√	√	×
	Acrossocheilus fasciatus	NC_023378.1	Vertebrata;Gnathostomata;Teleostomi;Euteleostomi;Actinopterygii;Actinopteri;Neopterygii;Teleostei;Osteoglossocephalai;Clupeocephala;Otomorpha;Ostariophysi;Otophysi;Cypriniphysae;Cypriniformes;Cyprinoidei;Cyprinidae;Acrossocheilinae;Acrossocheilus;Acrossocheilus fasciatus	√	√	√	√	√	√	√	√	√	√	√	×
	Acrossocheilus hemispinus	NC_022183.1	Vertebrata;Gnathostomata;Teleostomi;Euteleostomi;Actinopterygii;Actinopteri;Neopterygii;Teleostei;Osteoglossocephalai;Clupeocephala;Otomorpha;Ostariophysi;Otophysi;Cypriniphysae;Cypriniformes;Cyprinoidei;Cyprinidae;Acrossocheilinae;Acrossocheilus;Acrossocheilus hemispinus	√	√	√	√	√	√	√	√	√	√	√	×
	Acrossocheilus jishouensis	NC_034917.1	Vertebrata;Gnathostomata;Teleostomi;Euteleostomi;Actinopterygii;Actinopteri;Neopterygii;Teleostei;Osteoglossocephalai;Clupeocephala;Otomorpha;Ostariophysi;Otophysi;Cypriniphysae;Cypriniformes;Cyprinoidei;Cyprinidae;Acrossocheilinae;Acrossocheilus;Acrossocheilus jishouensis	√	√	√	√	√	√	√	√	√	√	×	×
	Acrossocheilus kreyenbergii	KY094969.1	Vertebrata;Gnathostomata;Teleostomi;Euteleostomi;Actinopterygii;Actinopteri;Neopterygii;Teleostei;Osteoglossocephalai;Clupeocephala;Otomorpha;Ostariophysi;Otophysi;Cypriniphysae;Cypriniformes;Cyprinoidei;Cyprinidae;Acrossocheilinae;Acrossocheilus;Acrossocheilus kreyenbergii	√	√	√	√	√	√	√	√	√	√	×	×
	Acrossocheilus longipinnis	NC_047455.1	Vertebrata;Gnathostomata;Teleostomi;Euteleostomi;Actinopterygii;Actinopteri;Neopterygii;Teleostei;Osteoglossocephalai;Clupeocephala;Otomorpha;Ostariophysi;Otophysi;Cypriniphysae;Cypriniformes;Cyprinoidei;Cyprinidae;Acrossocheilinae;Acrossocheilus;Acrossocheilus longipinnis	√	√	√	√	√	√	√	√	√	√	√	×
	Acrossocheilus monticola	KT367805.1	Vertebrata;Gnathostomata;Teleostomi;Euteleostomi;Actinopterygii;Actinopteri;Neopterygii;Teleostei;Osteoglossocephalai;Clupeocephala;Otomorpha;Ostariophysi;Otophysi;Cypriniphysae;Cypriniformes;Cyprinoidei;Cyprinidae;Acrossocheilinae;Acrossocheilus;Acrossocheilus monticola	√	√	√	√	√	√	√	√	√	√	√	×
	Acrossocheilus paradoxus	MG878098.1	Vertebrata;Gnathostomata;Teleostomi;Euteleostomi;Actinopterygii;Actinopteri;Neopterygii;Teleostei;Osteoglossocephalai;Clupeocephala;Otomorpha;Ostariophysi;Otophysi;Cypriniphysae;Cypriniformes;Cyprinoidei;Cyprinidae;Acrossocheilinae;Acrossocheilus;Acrossocheilus paradoxus	√	√	√	√	√	√	√	√	√	√	×	×
	Acrossocheilus parallens	KT715479.1	Vertebrata;Gnathostomata;Teleostomi;Euteleostomi;Actinopterygii;Actinopteri;Neopterygii;Teleostei;Osteoglossocephalai;Clupeocephala;Otomorpha;Ostariophysi;Otophysi;Cypriniphysae;Cypriniformes;Cyprinoidei;Cyprinidae;Acrossocheilinae;Acrossocheilus;Acrossocheilus parallens	√	√	√	√	√	√	√	√	√	√	√	×
	Acrossocheilus spinifer	NC_034918.1	Vertebrata;Gnathostomata;Teleostomi;Euteleostomi;Actinopterygii;Actinopteri;Neopterygii;Teleostei;Osteoglossocephalai;Clupeocephala;Otomorpha;Ostariophysi;Otophysi;Cypriniphysae;Cypriniformes;Cyprinoidei;Cyprinidae;Acrossocheilinae;Acrossocheilus;Acrossocheilus spinifer	√	√	√	√	√	√	√	√	√	√	√	×
	Acrossocheilus stenotaeniatus	NC_024934.1	Vertebrata;Gnathostomata;Teleostomi;Euteleostomi;Actinopterygii;Actinopteri;Neopterygii;Teleostei;Osteoglossocephalai;Clupeocephala;Otomorpha;Ostariophysi;Otophysi;Cypriniphysae;Cypriniformes;Cyprinoidei;Cyprinidae;Acrossocheilinae;Acrossocheilus;Acrossocheilus stenotaeniatus	√	√	√	√	√	√	√	√	√	√	√	×
	Acrossocheilus wenchowensis	MN266873.1	Vertebrata;Gnathostomata;Teleostomi;Euteleostomi;Actinopterygii;Actinopteri;Neopterygii;Teleostei;Osteoglossocephalai;Clupeocephala;Otomorpha;Ostariophysi;Otophysi;Cypriniphysae;Cypriniformes;Cyprinoidei;Cyprinidae;Acrossocheilinae;Acrossocheilus;Acrossocheilus wenchowensis	√	√	√	√	√	√	√	√	√	√	√	×
	Acrossocheilus wuyiensis	NC_034919.1	Vertebrata;Gnathostomata;Teleostomi;Euteleostomi;Actinopterygii;Actinopteri;Neopterygii;Teleostei;Osteoglossocephalai;Clupeocephala;Otomorpha;Ostariophysi;Otophysi;Cypriniphysae;Cypriniformes;Cyprinoidei;Cyprinidae;Acrossocheilinae;Acrossocheilus;Acrossocheilus wuyiensis	√	√	√	√	√	√	√	√	√	√	√	×
	Acrossocheilus yunnanensis	MN395748.1	Vertebrata;Gnathostomata;Teleostomi;Euteleostomi;Actinopterygii;Actinopteri;Neopterygii;Teleostei;Osteoglossocephalai;Clupeocephala;Otomorpha;Ostariophysi;Otophysi;Cypriniphysae;Cypriniformes;Cyprinoidei;Cyprinidae;Acrossocheilinae;Acrossocheilus;Acrossocheilus yunnanensis	√	√	√	√	√	√	√	√	√	√	√	×
	Aeoliscus strigatus	NC_010270.1	Vertebrata;Gnathostomata;Teleostomi;Euteleostomi;Actinopterygii;Actinopteri;Neopterygii;Teleostei;Osteoglossocephalai;Clupeocephala;Euteleosteomorpha;Neoteleostei;Eurypterygia;Ctenosquamata;Acanthomorphata;Euacanthomorphacea;Percomorphaceae;Syngnathiaria;Syngnathiformes;Syngnathiformes incertae sedis;Centriscidae;Centriscinae;Aeoliscus;Aeoliscus strigatus	√	√	√	√	√	√	√	√	×	√	√	×
	Aequidens metae	NC_033544.1	Vertebrata;Gnathostomata;Teleostomi;Euteleostomi;Actinopterygii;Actinopteri;Neopterygii;Teleostei;Osteoglossocephalai;Clupeocephala;Euteleosteomorpha;Neoteleostei;Eurypterygia;Ctenosquamata;Acanthomorphata;Euacanthomorphacea;Percomorphaceae;Ovalentaria;Cichlomorphae;Cichliformes;Cichlidae;New World cichlids;Cichlasomatinae;Cichlasomatini;Aequidens;Aequidens metae	√	√	√	√	√	√	√	√	×	√	√	×
	Aesopia cornuta	NC_021969.1	Vertebrata;Gnathostomata;Teleostomi;Euteleostomi;Actinopterygii;Actinopteri;Neopterygii;Teleostei;Osteoglossocephalai;Clupeocephala;Euteleosteomorpha;Neoteleostei;Eurypterygia;Ctenosquamata;Acanthomorphata;Euacanthomorphacea;Percomorphaceae;Carangaria;Pleuronectiformes;Pleuronectoidei;Soleidae;Aesopia;Aesopia cornuta	√	√	√	√	×	√	√	√	√	√	√	×
	Aethaloperca rogaa	NC_022141.1	Vertebrata;Gnathostomata;Teleostomi;Euteleostomi;Actinopterygii;Actinopteri;Neopterygii;Teleostei;Osteoglossocephalai;Clupeocephala;Euteleosteomorpha;Neoteleostei;Eurypterygia;Ctenosquamata;Acanthomorphata;Euacanthomorphacea;Percomorphaceae;Eupercaria;Perciformes;Serranoidei;Serranidae;Epinephelinae;Epinephelini;Aethaloperca;Aethaloperca rogaa	√	√	√	√	√	√	√	√	×	√	√	×
	Ageneiosus pardalis	NC_026717.1	Vertebrata;Gnathostomata;Teleostomi;Euteleostomi;Actinopterygii;Actinopteri;Neopterygii;Teleostei;Osteoglossocephalai;Clupeocephala;Otomorpha;Ostariophysi;Otophysi;Characiphysae;Siluriformes;Siluroidei;Auchenipteridae;Auchenipterinae;Ageneiosus;Ageneiosus pardalis	√	√	√	√	√	√	√	√	√	√	×	×
	Agonostomus monticola	JF911702.1	Vertebrata;Gnathostomata;Teleostomi;Euteleostomi;Actinopterygii;Actinopteri;Neopterygii;Teleostei;Osteoglossocephalai;Clupeocephala;Euteleosteomorpha;Neoteleostei;Eurypterygia;Ctenosquamata;Acanthomorphata;Euacanthomorphacea;Percomorphaceae;Ovalentaria;Mugilomorphae;Mugiliformes;Mugilidae;Agonostomus;Agonostomus monticola	√	√	√	√	√	√	√	√	×	√	×	×
	Ailia coila	NC_046497.1	Vertebrata;Gnathostomata;Teleostomi;Euteleostomi;Actinopterygii;Actinopteri;Neopterygii;Teleostei;Osteoglossocephalai;Clupeocephala;Otomorpha;Ostariophysi;Otophysi;Characiphysae;Siluriformes;Siluroidei;Ailiidae;Ailia;Ailia coila	√	√	√	√	√	√	√	√	√	√	√	×
	Albula glossodonta	NC_005800.1	Vertebrata;Gnathostomata;Teleostomi;Euteleostomi;Actinopterygii;Actinopteri;Neopterygii;Teleostei;Elopocephalai;Elopocephala;Elopomorpha;Albuliformes;Albulidae;Albulinae;Albula;Albula glossodonta	√	√	√	√	√	√	√	√	√	√	×	×
	Alburnus alburnus	MT410946.1	Vertebrata;Gnathostomata;Teleostomi;Euteleostomi;Actinopterygii;Actinopteri;Neopterygii;Teleostei;Osteoglossocephalai;Clupeocephala;Otomorpha;Ostariophysi;Otophysi;Cypriniphysae;Cypriniformes;Cyprinoidei;Leuciscidae;Leuciscinae;Alburnus;Alburnus alburnus	√	√	√	√	√	√	√	√	√	√	√	×
	Alburnus chalcoides aralensis	KF534726.1	Vertebrata;Gnathostomata;Teleostomi;Euteleostomi;Actinopterygii;Actinopteri;Neopterygii;Teleostei;Osteoglossocephalai;Clupeocephala;Otomorpha;Ostariophysi;Otophysi;Cypriniphysae;Cypriniformes;Cyprinoidei;Leuciscidae;Leuciscinae;Alburnus;Alburnus chalcoides;Alburnus chalcoides aralensis	√	√	√	√	√	√	√	√	√	√	√	×
	Alburnus istanbulensis	NC_019574.1	Vertebrata;Gnathostomata;Teleostomi;Euteleostomi;Actinopterygii;Actinopteri;Neopterygii;Teleostei;Osteoglossocephalai;Clupeocephala;Otomorpha;Ostariophysi;Otophysi;Cypriniphysae;Cypriniformes;Cyprinoidei;Leuciscidae;Leuciscinae;Alburnus;Alburnus istanbulensis	√	√	√	√	√	√	√	√	√	√	√	×
	Alburnus tarichi	NC_019575.1	Vertebrata;Gnathostomata;Teleostomi;Euteleostomi;Actinopterygii;Actinopteri;Neopterygii;Teleostei;Osteoglossocephalai;Clupeocephala;Otomorpha;Ostariophysi;Otophysi;Cypriniphysae;Cypriniformes;Cyprinoidei;Leuciscidae;Leuciscinae;Alburnus;Alburnus tarichi	√	√	√	√	√	√	√	√	√	√	√	×
	Aldrichetta forsteri	JF911703.1	Vertebrata;Gnathostomata;Teleostomi;Euteleostomi;Actinopterygii;Actinopteri;Neopterygii;Teleostei;Osteoglossocephalai;Clupeocephala;Euteleosteomorpha;Neoteleostei;Eurypterygia;Ctenosquamata;Acanthomorphata;Euacanthomorphacea;Percomorphaceae;Ovalentaria;Mugilomorphae;Mugiliformes;Mugilidae;Aldrichetta;Aldrichetta forsteri	√	√	√	√	√	√	√	√	×	√	√	×
	Aldrovandia affinis	NC_005801.1	Vertebrata;Gnathostomata;Teleostomi;Euteleostomi;Actinopterygii;Actinopteri;Neopterygii;Teleostei;Elopocephalai;Elopocephala;Elopomorpha;Notacanthiformes;Halosauridae;Aldrovandia;Aldrovandia affinis	√	√	√	√	√	√	√	√	√	√	√	×
	Alectis ciliaris	NC_025566.1	Vertebrata;Gnathostomata;Teleostomi;Euteleostomi;Actinopterygii;Actinopteri;Neopterygii;Teleostei;Osteoglossocephalai;Clupeocephala;Euteleosteomorpha;Neoteleostei;Eurypterygia;Ctenosquamata;Acanthomorphata;Euacanthomorphacea;Percomorphaceae;Carangaria;Carangiformes;Carangidae;Alectis;Alectis ciliaris	√	√	√	√	√	√	√	√	×	√	√	×
	Alectis indica	NC_037050.1	Vertebrata;Gnathostomata;Teleostomi;Euteleostomi;Actinopterygii;Actinopteri;Neopterygii;Teleostei;Osteoglossocephalai;Clupeocephala;Euteleosteomorpha;Neoteleostei;Eurypterygia;Ctenosquamata;Acanthomorphata;Euacanthomorphacea;Percomorphaceae;Carangaria;Carangiformes;Carangidae;Alectis;Alectis indica	√	√	√	√	√	√	√	√	×	√	√	×
	Alepes djedaba	NC_037049.1	Vertebrata;Gnathostomata;Teleostomi;Euteleostomi;Actinopterygii;Actinopteri;Neopterygii;Teleostei;Osteoglossocephalai;Clupeocephala;Euteleosteomorpha;Neoteleostei;Eurypterygia;Ctenosquamata;Acanthomorphata;Euacanthomorphacea;Percomorphaceae;Carangaria;Carangiformes;Carangidae;Alepes;Alepes djedaba	√	√	√	√	√	√	√	√	×	√	√	×
	Alepes kleinii	NC_023524.1	Vertebrata;Gnathostomata;Teleostomi;Euteleostomi;Actinopterygii;Actinopteri;Neopterygii;Teleostei;Osteoglossocephalai;Clupeocephala;Euteleosteomorpha;Neoteleostei;Eurypterygia;Ctenosquamata;Acanthomorphata;Euacanthomorphacea;Percomorphaceae;Carangaria;Carangiformes;Carangidae;Alepes;Alepes kleinii	√	√	√	√	√	√	√	√	×	√	√	×
	Alepocephalus agassizii	NC_013564.1	Vertebrata;Gnathostomata;Teleostomi;Euteleostomi;Actinopterygii;Actinopteri;Neopterygii;Teleostei;Osteoglossocephalai;Clupeocephala;Otomorpha;Alepocephali;Alepocephaliformes;Alepocephalidae;Alepocephalus;Alepocephalus agassizii	√	√	√	√	√	√	√	√	√	√	×	×
	Alepocephalus australis	NC_013566.1	Vertebrata;Gnathostomata;Teleostomi;Euteleostomi;Actinopterygii;Actinopteri;Neopterygii;Teleostei;Osteoglossocephalai;Clupeocephala;Otomorpha;Alepocephali;Alepocephaliformes;Alepocephalidae;Alepocephalus;Alepocephalus australis	√	√	√	√	√	√	√	√	√	√	√	×
	Alepocephalus bairdii	NC_013567.1	Vertebrata;Gnathostomata;Teleostomi;Euteleostomi;Actinopterygii;Actinopteri;Neopterygii;Teleostei;Osteoglossocephalai;Clupeocephala;Otomorpha;Alepocephali;Alepocephaliformes;Alepocephalidae;Alepocephalus;Alepocephalus bairdii	√	√	√	√	√	√	√	√	√	√	×	×
	Alepocephalus bicolor	NC_011012.1	Vertebrata;Gnathostomata;Teleostomi;Euteleostomi;Actinopterygii;Actinopteri;Neopterygii;Teleostei;Osteoglossocephalai;Clupeocephala;Otomorpha;Alepocephali;Alepocephaliformes;Alepocephalidae;Alepocephalus;Alepocephalus bicolor	√	√	√	√	√	√	√	√	√	√	√	×
	Alepocephalus productus	NC_013570.1	Vertebrata;Gnathostomata;Teleostomi;Euteleostomi;Actinopterygii;Actinopteri;Neopterygii;Teleostei;Osteoglossocephalai;Clupeocephala;Otomorpha;Alepocephali;Alepocephaliformes;Alepocephalidae;Alepocephalus;Alepocephalus productus	√	√	√	√	√	√	√	√	√	√	×	×
	Alepocephalus tenebrosus	NC_004590.1	Vertebrata;Gnathostomata;Teleostomi;Euteleostomi;Actinopterygii;Actinopteri;Neopterygii;Teleostei;Osteoglossocephalai;Clupeocephala;Otomorpha;Alepocephali;Alepocephaliformes;Alepocephalidae;Alepocephalus;Alepocephalus tenebrosus	√	√	√	√	√	√	√	√	√	√	√	×
	Alepocephalus umbriceps	NC_013572.1	Vertebrata;Gnathostomata;Teleostomi;Euteleostomi;Actinopterygii;Actinopteri;Neopterygii;Teleostei;Osteoglossocephalai;Clupeocephala;Otomorpha;Alepocephali;Alepocephaliformes;Alepocephalidae;Alepocephalus;Alepocephalus umbriceps	√	√	√	√	√	√	√	√	√	√	√	×
	Allocyttus niger	NC_004398.1	Vertebrata;Gnathostomata;Teleostomi;Euteleostomi;Actinopterygii;Actinopteri;Neopterygii;Teleostei;Osteoglossocephalai;Clupeocephala;Euteleosteomorpha;Neoteleostei;Eurypterygia;Ctenosquamata;Acanthomorphata;Paracanthopterygii;Zeiogadaria;Zeariae;Zeiformes;Oreosomatidae;Allocyttus;Allocyttus niger	√	√	×	√	√	√	√	√	×	√	√	×
	Alosa aestivalis	MG570463.1	Vertebrata;Gnathostomata;Teleostomi;Euteleostomi;Actinopterygii;Actinopteri;Neopterygii;Teleostei;Osteoglossocephalai;Clupeocephala;Otomorpha;Clupei;Clupeiformes;Clupeoidei;Clupeidae;Alosinae;Alosa;Alosa aestivalis	√	√	√	√	√	√	√	√	×	√	√	×
	Alosa alabamae	NC_028275.1	Vertebrata;Gnathostomata;Teleostomi;Euteleostomi;Actinopterygii;Actinopteri;Neopterygii;Teleostei;Osteoglossocephalai;Clupeocephala;Otomorpha;Clupei;Clupeiformes;Clupeoidei;Clupeidae;Alosinae;Alosa;Alosa alabamae	√	√	√	√	√	√	√	√	×	√	×	×
	Alosa alosa	NC_009575.1	Vertebrata;Gnathostomata;Teleostomi;Euteleostomi;Actinopterygii;Actinopteri;Neopterygii;Teleostei;Osteoglossocephalai;Clupeocephala;Otomorpha;Clupei;Clupeiformes;Clupeoidei;Clupeidae;Alosinae;Alosa;Alosa alosa	√	√	√	√	√	√	√	√	×	√	×	×
	Alosa mediocris	MG570462.1	Vertebrata;Gnathostomata;Teleostomi;Euteleostomi;Actinopterygii;Actinopteri;Neopterygii;Teleostei;Osteoglossocephalai;Clupeocephala;Otomorpha;Clupei;Clupeiformes;Clupeoidei;Clupeidae;Alosinae;Alosa;Alosa mediocris	√	√	√	√	√	√	√	√	×	√	×	×
	Alosa pseudoharengus	MG570440.1	Vertebrata;Gnathostomata;Teleostomi;Euteleostomi;Actinopterygii;Actinopteri;Neopterygii;Teleostei;Osteoglossocephalai;Clupeocephala;Otomorpha;Clupei;Clupeiformes;Clupeoidei;Clupeidae;Alosinae;Alosa;Alosa pseudoharengus	√	√	√	√	√	√	√	√	×	√	√	×
	Alosa sapidissima	MG570434.1	Vertebrata;Gnathostomata;Teleostomi;Euteleostomi;Actinopterygii;Actinopteri;Neopterygii;Teleostei;Osteoglossocephalai;Clupeocephala;Otomorpha;Clupei;Clupeiformes;Clupeoidei;Clupeidae;Alosinae;Alosa;Alosa sapidissima	√	√	√	√	√	√	√	√	×	√	×	×
	Alticorpus geoffreyi	NC_028033.1	Vertebrata;Gnathostomata;Teleostomi;Euteleostomi;Actinopterygii;Actinopteri;Neopterygii;Teleostei;Osteoglossocephalai;Clupeocephala;Euteleosteomorpha;Neoteleostei;Eurypterygia;Ctenosquamata;Acanthomorphata;Euacanthomorphacea;Percomorphaceae;Ovalentaria;Cichlomorphae;Cichliformes;Cichlidae;African cichlids;Pseudocrenilabrinae;Haplochromini;Alticorpus;Alticorpus geoffreyi	√	√	√	√	√	√	√	√	×	√	√	×
	Aluterus monoceros	NC_027268.1	Vertebrata;Gnathostomata;Teleostomi;Euteleostomi;Actinopterygii;Actinopteri;Neopterygii;Teleostei;Osteoglossocephalai;Clupeocephala;Euteleosteomorpha;Neoteleostei;Eurypterygia;Ctenosquamata;Acanthomorphata;Euacanthomorphacea;Percomorphaceae;Eupercaria;Tetraodontiformes;Balistoidea;Monacanthidae;Aluterus;Aluterus monoceros	√	√	√	√	√	√	√	√	×	√	√	×
	Aluterus scriptus	NC_011323.1	Vertebrata;Gnathostomata;Teleostomi;Euteleostomi;Actinopterygii;Actinopteri;Neopterygii;Teleostei;Osteoglossocephalai;Clupeocephala;Euteleosteomorpha;Neoteleostei;Eurypterygia;Ctenosquamata;Acanthomorphata;Euacanthomorphacea;Percomorphaceae;Eupercaria;Tetraodontiformes;Balistoidea;Monacanthidae;Aluterus;Aluterus scriptus	√	√	√	√	√	√	√	√	×	√	√	×
	Amanses scopas	NC_011952.1	Vertebrata;Gnathostomata;Teleostomi;Euteleostomi;Actinopterygii;Actinopteri;Neopterygii;Teleostei;Osteoglossocephalai;Clupeocephala;Euteleosteomorpha;Neoteleostei;Eurypterygia;Ctenosquamata;Acanthomorphata;Euacanthomorphacea;Percomorphaceae;Eupercaria;Tetraodontiformes;Balistoidea;Monacanthidae;Amanses;Amanses scopas	√	√	√	√	√	√	√	√	×	√	×	√
	Amazonsprattus scintilla	NC_014265.1	Vertebrata;Gnathostomata;Teleostomi;Euteleostomi;Actinopterygii;Actinopteri;Neopterygii;Teleostei;Osteoglossocephalai;Clupeocephala;Otomorpha;Clupei;Clupeiformes;Clupeoidei;Engraulidae;Engraulinae;Amazonsprattus;Amazonsprattus scintilla	√	√	√	√	√	√	√	√	×	√	√	×
	Ambassis gymnocephalus	NC_033497.1	Vertebrata;Gnathostomata;Teleostomi;Euteleostomi;Actinopterygii;Actinopteri;Neopterygii;Teleostei;Osteoglossocephalai;Clupeocephala;Euteleosteomorpha;Neoteleostei;Eurypterygia;Ctenosquamata;Acanthomorphata;Euacanthomorphacea;Percomorphaceae;Ovalentaria;Ovalentaria incertae sedis;Ambassidae;Ambassis;Ambassis gymnocephalus	√	√	√	√	√	√	√	√	×	√	√	×
	Ambastaia sidthimunki	NC_027175.1	Vertebrata;Gnathostomata;Teleostomi;Euteleostomi;Actinopterygii;Actinopteri;Neopterygii;Teleostei;Osteoglossocephalai;Clupeocephala;Otomorpha;Ostariophysi;Otophysi;Cypriniphysae;Cypriniformes;Cobitoidei;Botiidae;Ambastaia;Ambastaia sidthimunki	√	√	√	√	√	√	√	√	√	√	√	×
	Ambloplites rupestris	NC_035659.1	Vertebrata;Gnathostomata;Teleostomi;Euteleostomi;Actinopterygii;Actinopteri;Neopterygii;Teleostei;Osteoglossocephalai;Clupeocephala;Euteleosteomorpha;Neoteleostei;Eurypterygia;Ctenosquamata;Acanthomorphata;Euacanthomorphacea;Percomorphaceae;Eupercaria;Centrarchiformes;Centrarchoidei;Centrarchidae;Ambloplites;Ambloplites rupestris	√	√	√	√	√	√	√	√	×	√	√	×
	Amblychaeturichthys hexanema	NC_029228.1	Vertebrata;Gnathostomata;Teleostomi;Euteleostomi;Actinopterygii;Actinopteri;Neopterygii;Teleostei;Osteoglossocephalai;Clupeocephala;Euteleosteomorpha;Neoteleostei;Eurypterygia;Ctenosquamata;Acanthomorphata;Euacanthomorphacea;Percomorphaceae;Gobiaria;Gobiiformes;Gobioidei;Gobiidae;Gobionellinae;Amblychaeturichthys;Amblychaeturichthys hexanema	√	√	√	√	√	√	√	√	√	√	√	×
	Amblydoras gonzalezi	NC_015745.1	Vertebrata;Gnathostomata;Teleostomi;Euteleostomi;Actinopterygii;Actinopteri;Neopterygii;Teleostei;Osteoglossocephalai;Clupeocephala;Otomorpha;Ostariophysi;Otophysi;Characiphysae;Siluriformes;Siluroidei;Doradidae;Amblydoras;Amblydoras gonzalezi	√	√	√	√	√	√	√	√	√	√	×	×
	Amblyglyphidodon curacao	NC_043918.1	Vertebrata;Gnathostomata;Teleostomi;Euteleostomi;Actinopterygii;Actinopteri;Neopterygii;Teleostei;Osteoglossocephalai;Clupeocephala;Euteleosteomorpha;Neoteleostei;Eurypterygia;Ctenosquamata;Acanthomorphata;Euacanthomorphacea;Percomorphaceae;Ovalentaria;Ovalentaria incertae sedis;Pomacentridae;Amblyglyphidodon;Amblyglyphidodon curacao	√	√	√	√	√	√	√	√	×	√	√	×
	Amblypharyngodon mola	NC_043864.1	Vertebrata;Gnathostomata;Teleostomi;Euteleostomi;Actinopterygii;Actinopteri;Neopterygii;Teleostei;Osteoglossocephalai;Clupeocephala;Otomorpha;Ostariophysi;Otophysi;Cypriniphysae;Cypriniformes;Cyprinoidei;Danionidae;Rasborinae;Amblypharyngodon;Amblypharyngodon mola	√	√	√	√	√	√	√	√	√	√	√	×
	Ameiurus catus	MH324425.1	Vertebrata;Gnathostomata;Teleostomi;Euteleostomi;Actinopterygii;Actinopteri;Neopterygii;Teleostei;Osteoglossocephalai;Clupeocephala;Otomorpha;Ostariophysi;Otophysi;Characiphysae;Siluriformes;Siluroidei;Ictaluridae;Ameiurus;Ameiurus catus	√	√	√	√	√	√	√	√	√	√	√	×
	Ameiurus melas	KT804702.1	Vertebrata;Gnathostomata;Teleostomi;Euteleostomi;Actinopterygii;Actinopteri;Neopterygii;Teleostei;Osteoglossocephalai;Clupeocephala;Otomorpha;Ostariophysi;Otophysi;Characiphysae;Siluriformes;Siluroidei;Ictaluridae;Ameiurus;Ameiurus melas	√	√	√	√	√	√	×	√	√	√	√	×
	Ameiurus natalis	MG570406.1	Vertebrata;Gnathostomata;Teleostomi;Euteleostomi;Actinopterygii;Actinopteri;Neopterygii;Teleostei;Osteoglossocephalai;Clupeocephala;Otomorpha;Ostariophysi;Otophysi;Characiphysae;Siluriformes;Siluroidei;Ictaluridae;Ameiurus;Ameiurus natalis	√	√	√	√	√	√	√	√	√	√	√	×
	Ameiurus nebulosus	MF621734.1	Vertebrata;Gnathostomata;Teleostomi;Euteleostomi;Actinopterygii;Actinopteri;Neopterygii;Teleostei;Osteoglossocephalai;Clupeocephala;Otomorpha;Ostariophysi;Otophysi;Characiphysae;Siluriformes;Siluroidei;Ictaluridae;Ameiurus;Ameiurus nebulosus	√	√	√	√	√	√	√	√	√	√	√	×
	Amia calva	AY442347.1	Vertebrata;Gnathostomata;Teleostomi;Euteleostomi;Actinopterygii;Actinopteri;Neopterygii;Holostei;Amiiformes;Amiidae;Amia;Amia calva	√	√	√	√	√	√	√	√	×	√	√	×
	Ammocrypta beanii	MN402459.1	Vertebrata;Gnathostomata;Teleostomi;Euteleostomi;Actinopterygii;Actinopteri;Neopterygii;Teleostei;Osteoglossocephalai;Clupeocephala;Euteleosteomorpha;Neoteleostei;Eurypterygia;Ctenosquamata;Acanthomorphata;Euacanthomorphacea;Percomorphaceae;Eupercaria;Perciformes;Percoidei;Percidae;Etheostomatinae;Ammocrypta;Ammocrypta beanii	√	√	√	√	√	√	√	√	×	√	×	×
	Ammodytes americanus	NC_028530.1	Vertebrata;Gnathostomata;Teleostomi;Euteleostomi;Actinopterygii;Actinopteri;Neopterygii;Teleostei;Osteoglossocephalai;Clupeocephala;Euteleosteomorpha;Neoteleostei;Eurypterygia;Ctenosquamata;Acanthomorphata;Euacanthomorphacea;Percomorphaceae;Eupercaria;Uranoscopiformes;Ammodytidae;Ammodytes;Ammodytes americanus	√	√	√	√	√	√	√	√	×	√	√	√
	Ammodytes dubius	NC_028529.1	Vertebrata;Gnathostomata;Teleostomi;Euteleostomi;Actinopterygii;Actinopteri;Neopterygii;Teleostei;Osteoglossocephalai;Clupeocephala;Euteleosteomorpha;Neoteleostei;Eurypterygia;Ctenosquamata;Acanthomorphata;Euacanthomorphacea;Percomorphaceae;Eupercaria;Uranoscopiformes;Ammodytidae;Ammodytes;Ammodytes dubius	√	√	√	√	√	√	√	√	×	√	√	√
	Ammodytes hexapterus	NC_020461.1	Vertebrata;Gnathostomata;Teleostomi;Euteleostomi;Actinopterygii;Actinopteri;Neopterygii;Teleostei;Osteoglossocephalai;Clupeocephala;Euteleosteomorpha;Neoteleostei;Eurypterygia;Ctenosquamata;Acanthomorphata;Euacanthomorphacea;Percomorphaceae;Eupercaria;Uranoscopiformes;Ammodytidae;Ammodytes;Ammodytes hexapterus	√	√	√	√	√	√	√	√	×	√	√	√
	Ammodytes marinus	MN122922.1	Vertebrata;Gnathostomata;Teleostomi;Euteleostomi;Actinopterygii;Actinopteri;Neopterygii;Teleostei;Osteoglossocephalai;Clupeocephala;Euteleosteomorpha;Neoteleostei;Eurypterygia;Ctenosquamata;Acanthomorphata;Euacanthomorphacea;Percomorphaceae;Eupercaria;Uranoscopiformes;Ammodytidae;Ammodytes;Ammodytes marinus	√	√	√	√	√	√	√	√	×	√	√	√
	Ammodytes personatus	MK163332.1	Vertebrata;Gnathostomata;Teleostomi;Euteleostomi;Actinopterygii;Actinopteri;Neopterygii;Teleostei;Osteoglossocephalai;Clupeocephala;Euteleosteomorpha;Neoteleostei;Eurypterygia;Ctenosquamata;Acanthomorphata;Euacanthomorphacea;Percomorphaceae;Eupercaria;Uranoscopiformes;Ammodytidae;Ammodytes;Ammodytes personatus	√	√	√	√	√	√	√	√	×	√	√	√
	Ammodytes tobianus	MN122889.1	Vertebrata;Gnathostomata;Teleostomi;Euteleostomi;Actinopterygii;Actinopteri;Neopterygii;Teleostei;Osteoglossocephalai;Clupeocephala;Euteleosteomorpha;Neoteleostei;Eurypterygia;Ctenosquamata;Acanthomorphata;Euacanthomorphacea;Percomorphaceae;Eupercaria;Uranoscopiformes;Ammodytidae;Ammodytes;Ammodytes tobianus	√	√	√	√	√	√	√	√	×	√	√	×
	Amoya chusanensis	NC_020347.1	Vertebrata;Gnathostomata;Teleostomi;Euteleostomi;Actinopterygii;Actinopteri;Neopterygii;Teleostei;Osteoglossocephalai;Clupeocephala;Euteleosteomorpha;Neoteleostei;Eurypterygia;Ctenosquamata;Acanthomorphata;Euacanthomorphacea;Percomorphaceae;Gobiaria;Gobiiformes;Gobioidei;Gobiidae;Gobiinae;Amoya;Amoya chusanensis	√	√	√	√	√	√	√	√	√	√	√	×
	Amphilius sp. NM-2010	NC_015746.1	Vertebrata;Gnathostomata;Teleostomi;Euteleostomi;Actinopterygii;Actinopteri;Neopterygii;Teleostei;Osteoglossocephalai;Clupeocephala;Otomorpha;Ostariophysi;Otophysi;Characiphysae;Siluriformes;Siluroidei;Amphiliidae;Amphiliinae;Amphilius;unclassified Amphilius;Amphilius sp. NM-2010	√	√	√	√	√	√	√	√	√	√	×	×
	Amphilophus amarillo	KY315559.1	Vertebrata;Gnathostomata;Teleostomi;Euteleostomi;Actinopterygii;Actinopteri;Neopterygii;Teleostei;Osteoglossocephalai;Clupeocephala;Euteleosteomorpha;Neoteleostei;Eurypterygia;Ctenosquamata;Acanthomorphata;Euacanthomorphacea;Percomorphaceae;Ovalentaria;Cichlomorphae;Cichliformes;Cichlidae;New World cichlids;Cichlasomatinae;Heroini;Amphilophus;Amphilophus amarillo	√	√	√	√	√	√	√	√	×	√	√	×
	Amphilophus citrinellus	KJ562277.1	Vertebrata;Gnathostomata;Teleostomi;Euteleostomi;Actinopterygii;Actinopteri;Neopterygii;Teleostei;Osteoglossocephalai;Clupeocephala;Euteleosteomorpha;Neoteleostei;Eurypterygia;Ctenosquamata;Acanthomorphata;Euacanthomorphacea;Percomorphaceae;Ovalentaria;Cichlomorphae;Cichliformes;Cichlidae;New World cichlids;Cichlasomatinae;Heroini;Amphilophus;Amphilophus citrinellus	√	√	√	√	√	√	√	√	×	√	√	×
	Amphiprion akallopisos	NC_030590.1	Vertebrata;Gnathostomata;Teleostomi;Euteleostomi;Actinopterygii;Actinopteri;Neopterygii;Teleostei;Osteoglossocephalai;Clupeocephala;Euteleosteomorpha;Neoteleostei;Eurypterygia;Ctenosquamata;Acanthomorphata;Euacanthomorphacea;Percomorphaceae;Ovalentaria;Ovalentaria incertae sedis;Pomacentridae;Amphiprion;Amphiprion akallopisos	√	√	√	√	×	√	√	√	×	√	√	×
	Amphiprion bicinctus	JQ030887.1	Vertebrata;Gnathostomata;Teleostomi;Euteleostomi;Actinopterygii;Actinopteri;Neopterygii;Teleostei;Osteoglossocephalai;Clupeocephala;Euteleosteomorpha;Neoteleostei;Eurypterygia;Ctenosquamata;Acanthomorphata;Euacanthomorphacea;Percomorphaceae;Ovalentaria;Ovalentaria incertae sedis;Pomacentridae;Amphiprion;Amphiprion bicinctus	√	√	√	√	√	√	√	√	×	√	√	×
	Amphiprion clarkii	NC_023967.1	Vertebrata;Gnathostomata;Teleostomi;Euteleostomi;Actinopterygii;Actinopteri;Neopterygii;Teleostei;Osteoglossocephalai;Clupeocephala;Euteleosteomorpha;Neoteleostei;Eurypterygia;Ctenosquamata;Acanthomorphata;Euacanthomorphacea;Percomorphaceae;Ovalentaria;Ovalentaria incertae sedis;Pomacentridae;Amphiprion;Amphiprion clarkii	√	√	√	√	√	√	√	√	×	√	√	×
	Amphiprion ephippium	NC_030589.1	Vertebrata;Gnathostomata;Teleostomi;Euteleostomi;Actinopterygii;Actinopteri;Neopterygii;Teleostei;Osteoglossocephalai;Clupeocephala;Euteleosteomorpha;Neoteleostei;Eurypterygia;Ctenosquamata;Acanthomorphata;Euacanthomorphacea;Percomorphaceae;Ovalentaria;Ovalentaria incertae sedis;Pomacentridae;Amphiprion;Amphiprion ephippium	√	√	√	√	√	√	√	√	×	√	√	×
	Amphiprion frenatus	NC_024840.1	Vertebrata;Gnathostomata;Teleostomi;Euteleostomi;Actinopterygii;Actinopteri;Neopterygii;Teleostei;Osteoglossocephalai;Clupeocephala;Euteleosteomorpha;Neoteleostei;Eurypterygia;Ctenosquamata;Acanthomorphata;Euacanthomorphacea;Percomorphaceae;Ovalentaria;Ovalentaria incertae sedis;Pomacentridae;Amphiprion;Amphiprion frenatus	√	√	√	√	√	√	√	√	×	√	√	×
	Amphiprion ocellaris	NC_009065.1	Vertebrata;Gnathostomata;Teleostomi;Euteleostomi;Actinopterygii;Actinopteri;Neopterygii;Teleostei;Osteoglossocephalai;Clupeocephala;Euteleosteomorpha;Neoteleostei;Eurypterygia;Ctenosquamata;Acanthomorphata;Euacanthomorphacea;Percomorphaceae;Ovalentaria;Ovalentaria incertae sedis;Pomacentridae;Amphiprion;Amphiprion ocellaris	√	√	√	√	√	√	√	√	×	√	√	×
	Amphiprion percula	NC_023966.1	Vertebrata;Gnathostomata;Teleostomi;Euteleostomi;Actinopterygii;Actinopteri;Neopterygii;Teleostei;Osteoglossocephalai;Clupeocephala;Euteleosteomorpha;Neoteleostei;Eurypterygia;Ctenosquamata;Acanthomorphata;Euacanthomorphacea;Percomorphaceae;Ovalentaria;Ovalentaria incertae sedis;Pomacentridae;Amphiprion;Amphiprion percula	√	√	√	√	√	√	√	√	×	√	√	×
	Amphiprion perideraion	NC_024841.1	Vertebrata;Gnathostomata;Teleostomi;Euteleostomi;Actinopterygii;Actinopteri;Neopterygii;Teleostei;Osteoglossocephalai;Clupeocephala;Euteleosteomorpha;Neoteleostei;Eurypterygia;Ctenosquamata;Acanthomorphata;Euacanthomorphacea;Percomorphaceae;Ovalentaria;Ovalentaria incertae sedis;Pomacentridae;Amphiprion;Amphiprion perideraion	√	√	√	√	√	√	√	√	×	√	√	×
	Amphiprion polymnus	NC_023826.1	Vertebrata;Gnathostomata;Teleostomi;Euteleostomi;Actinopterygii;Actinopteri;Neopterygii;Teleostei;Osteoglossocephalai;Clupeocephala;Euteleosteomorpha;Neoteleostei;Eurypterygia;Ctenosquamata;Acanthomorphata;Euacanthomorphacea;Percomorphaceae;Ovalentaria;Ovalentaria incertae sedis;Pomacentridae;Amphiprion;Amphiprion polymnus	√	√	√	√	√	√	√	√	×	√	√	×
	Amphiprion sebae	NC_030591.1	Vertebrata;Gnathostomata;Teleostomi;Euteleostomi;Actinopterygii;Actinopteri;Neopterygii;Teleostei;Osteoglossocephalai;Clupeocephala;Euteleosteomorpha;Neoteleostei;Eurypterygia;Ctenosquamata;Acanthomorphata;Euacanthomorphacea;Percomorphaceae;Ovalentaria;Ovalentaria incertae sedis;Pomacentridae;Amphiprion;Amphiprion sebae	×	×	√	×	√	√	√	√	×	√	√	×
	Anabarilius brevianalis	MK757491.1	Vertebrata;Gnathostomata;Teleostomi;Euteleostomi;Actinopterygii;Actinopteri;Neopterygii;Teleostei;Osteoglossocephalai;Clupeocephala;Otomorpha;Ostariophysi;Otophysi;Cypriniphysae;Cypriniformes;Cyprinoidei;Xenocyprididae;Xenocypridinae;Xenocypridinae incertae sedis;Anabarilius;Anabarilius brevianalis	√	√	√	√	√	√	√	√	√	√	×	×
	Anabarilius grahami	MF370204.1	Vertebrata;Gnathostomata;Teleostomi;Euteleostomi;Actinopterygii;Actinopteri;Neopterygii;Teleostei;Osteoglossocephalai;Clupeocephala;Otomorpha;Ostariophysi;Otophysi;Cypriniphysae;Cypriniformes;Cyprinoidei;Xenocyprididae;Xenocypridinae;Xenocypridinae incertae sedis;Anabarilius;Anabarilius grahami	√	√	√	√	√	√	√	√	√	√	×	×
	Anabarilius liui yalongensis	MG702493.1	Vertebrata;Gnathostomata;Teleostomi;Euteleostomi;Actinopterygii;Actinopteri;Neopterygii;Teleostei;Osteoglossocephalai;Clupeocephala;Otomorpha;Ostariophysi;Otophysi;Cypriniphysae;Cypriniformes;Cyprinoidei;Xenocyprididae;Xenocypridinae;Xenocypridinae incertae sedis;Anabarilius;Anabarilius liui;Anabarilius liui yalongensis	√	√	√	√	√	√	√	√	√	√	×	×
	Anabas testudineus	KX950694.1	Vertebrata;Gnathostomata;Teleostomi;Euteleostomi;Actinopterygii;Actinopteri;Neopterygii;Teleostei;Osteoglossocephalai;Clupeocephala;Euteleosteomorpha;Neoteleostei;Eurypterygia;Ctenosquamata;Acanthomorphata;Euacanthomorphacea;Percomorphaceae;Anabantaria;Anabantiformes;Anabantoidei;Anabantidae;Anabas;Anabas testudineus	√	√	√	√	√	√	√	√	×	√	√	×
	Anarchias sp. Ansp	NC_013613.1	Vertebrata;Gnathostomata;Teleostomi;Euteleostomi;Actinopterygii;Actinopteri;Neopterygii;Teleostei;Elopocephalai;Elopocephala;Elopomorpha;Anguilliformes;Muraenidae;Uropterygiinae;Anarchias;unclassified Anarchias;Anarchias sp. Ansp	√	√	√	√	√	√	√	√	×	√	×	×
	Anarhichas denticulatus	NC_037606.1	Vertebrata;Gnathostomata;Teleostomi;Euteleostomi;Actinopterygii;Actinopteri;Neopterygii;Teleostei;Osteoglossocephalai;Clupeocephala;Euteleosteomorpha;Neoteleostei;Eurypterygia;Ctenosquamata;Acanthomorphata;Euacanthomorphacea;Percomorphaceae;Eupercaria;Perciformes;Cottioidei;Zoarcales;Anarhichadidae;Anarhichas;Anarhichas denticulatus	√	√	√	√	√	√	√	√	×	√	√	×
	Anarhichas lupus	MT410929.1	Vertebrata;Gnathostomata;Teleostomi;Euteleostomi;Actinopterygii;Actinopteri;Neopterygii;Teleostei;Osteoglossocephalai;Clupeocephala;Euteleosteomorpha;Neoteleostei;Eurypterygia;Ctenosquamata;Acanthomorphata;Euacanthomorphacea;Percomorphaceae;Eupercaria;Perciformes;Cottioidei;Zoarcales;Anarhichadidae;Anarhichas;Anarhichas lupus	√	√	√	√	√	√	√	√	×	√	√	×
	Anarhichas minor	NC_037609.1	Vertebrata;Gnathostomata;Teleostomi;Euteleostomi;Actinopterygii;Actinopteri;Neopterygii;Teleostei;Osteoglossocephalai;Clupeocephala;Euteleosteomorpha;Neoteleostei;Eurypterygia;Ctenosquamata;Acanthomorphata;Euacanthomorphacea;Percomorphaceae;Eupercaria;Perciformes;Cottioidei;Zoarcales;Anarhichadidae;Anarhichas;Anarhichas minor	√	√	√	√	√	√	√	√	×	√	√	×
	Anarrhichthys ocellatus	NC_044782.1	Vertebrata;Gnathostomata;Teleostomi;Euteleostomi;Actinopterygii;Actinopteri;Neopterygii;Teleostei;Osteoglossocephalai;Clupeocephala;Euteleosteomorpha;Neoteleostei;Eurypterygia;Ctenosquamata;Acanthomorphata;Euacanthomorphacea;Percomorphaceae;Eupercaria;Perciformes;Cottioidei;Zoarcales;Anarhichadidae;Anarrhichthys;Anarrhichthys ocellatus	√	√	√	√	√	√	√	√	×	√	√	×
	Ancherythroculter kurematsui	NC_029707.1	Vertebrata;Gnathostomata;Teleostomi;Euteleostomi;Actinopterygii;Actinopteri;Neopterygii;Teleostei;Osteoglossocephalai;Clupeocephala;Otomorpha;Ostariophysi;Otophysi;Cypriniphysae;Cypriniformes;Cyprinoidei;Xenocyprididae;Xenocypridinae;Ancherythroculter;Ancherythroculter kurematsui	√	√	√	√	√	√	√	√	√	√	√	×
	Ancherythroculter lini	NC_027741.1	Vertebrata;Gnathostomata;Teleostomi;Euteleostomi;Actinopterygii;Actinopteri;Neopterygii;Teleostei;Osteoglossocephalai;Clupeocephala;Otomorpha;Ostariophysi;Otophysi;Cypriniphysae;Cypriniformes;Cyprinoidei;Xenocyprididae;Xenocypridinae;Ancherythroculter;Ancherythroculter lini	√	√	√	√	√	√	√	√	√	√	×	×
	Ancherythroculter nigrocauda	MT588183.1	Vertebrata;Gnathostomata;Teleostomi;Euteleostomi;Actinopterygii;Actinopteri;Neopterygii;Teleostei;Osteoglossocephalai;Clupeocephala;Otomorpha;Ostariophysi;Otophysi;Cypriniphysae;Cypriniformes;Cyprinoidei;Xenocyprididae;Xenocypridinae;Ancherythroculter;Ancherythroculter nigrocauda	√	√	√	√	√	√	√	√	√	√	√	×
	Ancherythroculter wangi	MG575902.1	Vertebrata;Gnathostomata;Teleostomi;Euteleostomi;Actinopterygii;Actinopteri;Neopterygii;Teleostei;Osteoglossocephalai;Clupeocephala;Otomorpha;Ostariophysi;Otophysi;Cypriniphysae;Cypriniformes;Cyprinoidei;Xenocyprididae;Xenocypridinae;Ancherythroculter;Ancherythroculter wangi	√	√	√	√	√	√	√	√	√	√	√	×
	Anchoviella sp. LBP 2297	NC_014269.1	Vertebrata;Gnathostomata;Teleostomi;Euteleostomi;Actinopterygii;Actinopteri;Neopterygii;Teleostei;Osteoglossocephalai;Clupeocephala;Otomorpha;Clupei;Clupeiformes;Clupeoidei;Engraulidae;Engraulinae;Anchoviella;unclassified Anchoviella;Anchoviella sp. LBP 2297	√	√	√	√	√	√	√	√	×	√	√	×
	Ancistrus cryptophthalmus	MF804392.1	Vertebrata;Gnathostomata;Teleostomi;Euteleostomi;Actinopterygii;Actinopteri;Neopterygii;Teleostei;Osteoglossocephalai;Clupeocephala;Otomorpha;Ostariophysi;Otophysi;Characiphysae;Siluriformes;Loricarioidei;Loricariidae;Ancistrinae;Ancistrus;Ancistrus cryptophthalmus	√	√	√	√	√	√	√	√	√	√	√	×
	Ancistrus sp. VRP-2014	KM066005.2	Vertebrata;Gnathostomata;Teleostomi;Euteleostomi;Actinopterygii;Actinopteri;Neopterygii;Teleostei;Osteoglossocephalai;Clupeocephala;Otomorpha;Ostariophysi;Otophysi;Characiphysae;Siluriformes;Loricarioidei;Loricariidae;Ancistrinae;Ancistrus;unclassified Ancistrus;Ancistrus sp. VRP-2014	√	√	√	√	√	√	√	√	√	√	√	×
	Ancistrus temminckii	MT528234.1	Vertebrata;Gnathostomata;Teleostomi;Euteleostomi;Actinopterygii;Actinopteri;Neopterygii;Teleostei;Osteoglossocephalai;Clupeocephala;Otomorpha;Ostariophysi;Otophysi;Characiphysae;Siluriformes;Loricarioidei;Loricariidae;Ancistrinae;Ancistrus;Ancistrus temminckii	√	√	√	√	√	√	√	√	√	√	√	×
	Andinoacara pulcher	NC_033547.1	Vertebrata;Gnathostomata;Teleostomi;Euteleostomi;Actinopterygii;Actinopteri;Neopterygii;Teleostei;Osteoglossocephalai;Clupeocephala;Euteleosteomorpha;Neoteleostei;Eurypterygia;Ctenosquamata;Acanthomorphata;Euacanthomorphacea;Percomorphaceae;Ovalentaria;Cichlomorphae;Cichliformes;Cichlidae;New World cichlids;Cichlasomatinae;Cichlasomatini;Andinoacara;Andinoacara pulcher	√	√	√	√	√	√	√	√	×	√	√	×
	Andinoacara rivulatus	NC_025671.1	Vertebrata;Gnathostomata;Teleostomi;Euteleostomi;Actinopterygii;Actinopteri;Neopterygii;Teleostei;Osteoglossocephalai;Clupeocephala;Euteleosteomorpha;Neoteleostei;Eurypterygia;Ctenosquamata;Acanthomorphata;Euacanthomorphacea;Percomorphaceae;Ovalentaria;Cichlomorphae;Cichliformes;Cichlidae;New World cichlids;Cichlasomatinae;Cichlasomatini;Andinoacara;Andinoacara rivulatus	√	√	√	√	√	√	√	√	×	√	√	×
	Anguilla anguilla	MT410930.1	Vertebrata;Gnathostomata;Teleostomi;Euteleostomi;Actinopterygii;Actinopteri;Neopterygii;Teleostei;Elopocephalai;Elopocephala;Elopomorpha;Anguilliformes;Anguillidae;Anguilla;Anguilla anguilla	√	√	√	√	√	√	√	√	×	√	√	×
	Anguilla australis australis	NC_006532.1	Vertebrata;Gnathostomata;Teleostomi;Euteleostomi;Actinopterygii;Actinopteri;Neopterygii;Teleostei;Elopocephalai;Elopocephala;Elopomorpha;Anguilliformes;Anguillidae;Anguilla;Anguilla australis;Anguilla australis australis	√	√	√	√	√	√	√	√	×	√	√	√
	Anguilla australis schmidti	NC_006533.1	Vertebrata;Gnathostomata;Teleostomi;Euteleostomi;Actinopterygii;Actinopteri;Neopterygii;Teleostei;Elopocephalai;Elopocephala;Elopomorpha;Anguilliformes;Anguillidae;Anguilla;Anguilla australis;Anguilla australis schmidti	√	√	√	√	√	√	√	√	×	√	√	√
	Anguilla bengalensis bengalensis	KT895265.1	Vertebrata;Gnathostomata;Teleostomi;Euteleostomi;Actinopterygii;Actinopteri;Neopterygii;Teleostei;Elopocephalai;Elopocephala;Elopomorpha;Anguilliformes;Anguillidae;Anguilla;Anguilla bengalensis;Anguilla bengalensis bengalensis	√	√	√	√	√	√	√	√	×	√	√	×
	Anguilla bicolor bicolor	NC_006534.1	Vertebrata;Gnathostomata;Teleostomi;Euteleostomi;Actinopterygii;Actinopteri;Neopterygii;Teleostei;Elopocephalai;Elopocephala;Elopomorpha;Anguilliformes;Anguillidae;Anguilla;Anguilla bicolor;Anguilla bicolor bicolor	√	√	√	√	√	√	√	√	×	√	√	√
	Anguilla bicolor pacifica	NC_006535.3	Vertebrata;Gnathostomata;Teleostomi;Euteleostomi;Actinopterygii;Actinopteri;Neopterygii;Teleostei;Elopocephalai;Elopocephala;Elopomorpha;Anguilliformes;Anguillidae;Anguilla;Anguilla bicolor;Anguilla bicolor pacifica	√	√	√	√	√	√	√	√	×	√	√	√
	Anguilla celebesensis	NC_006537.1	Vertebrata;Gnathostomata;Teleostomi;Euteleostomi;Actinopterygii;Actinopteri;Neopterygii;Teleostei;Elopocephalai;Elopocephala;Elopomorpha;Anguilliformes;Anguillidae;Anguilla;Anguilla celebesensis	√	√	√	√	√	√	√	√	×	√	√	×
	Anguilla dieffenbachii	NC_006538.1	Vertebrata;Gnathostomata;Teleostomi;Euteleostomi;Actinopterygii;Actinopteri;Neopterygii;Teleostei;Elopocephalai;Elopocephala;Elopomorpha;Anguilliformes;Anguillidae;Anguilla;Anguilla dieffenbachii	√	√	√	√	√	√	√	√	×	√	√	√
	Anguilla interioris	NC_006539.1	Vertebrata;Gnathostomata;Teleostomi;Euteleostomi;Actinopterygii;Actinopteri;Neopterygii;Teleostei;Elopocephalai;Elopocephala;Elopomorpha;Anguilliformes;Anguillidae;Anguilla;Anguilla interioris	√	√	√	√	√	√	√	√	×	√	√	×
	Anguilla japonica	MH050933.1	Vertebrata;Gnathostomata;Teleostomi;Euteleostomi;Actinopterygii;Actinopteri;Neopterygii;Teleostei;Elopocephalai;Elopocephala;Elopomorpha;Anguilliformes;Anguillidae;Anguilla;Anguilla japonica	√	√	√	√	√	√	√	√	×	√	√	×
	Anguilla labiata	NC_006543.1	Vertebrata;Gnathostomata;Teleostomi;Euteleostomi;Actinopterygii;Actinopteri;Neopterygii;Teleostei;Elopocephalai;Elopocephala;Elopomorpha;Anguilliformes;Anguillidae;Anguilla;Anguilla labiata	√	√	√	√	√	√	√	√	×	√	√	×
	Anguilla luzonensis	EU917054.1	Vertebrata;Gnathostomata;Teleostomi;Euteleostomi;Actinopterygii;Actinopteri;Neopterygii;Teleostei;Elopocephalai;Elopocephala;Elopomorpha;Anguilliformes;Anguillidae;Anguilla;Anguilla luzonensis	√	√	√	√	√	√	√	√	×	√	√	×
	Anguilla malgumora	NC_006536.1	Vertebrata;Gnathostomata;Teleostomi;Euteleostomi;Actinopterygii;Actinopteri;Neopterygii;Teleostei;Elopocephalai;Elopocephala;Elopomorpha;Anguilliformes;Anguillidae;Anguilla;Anguilla malgumora	√	√	√	√	√	√	√	√	×	√	√	×
	Anguilla marmorata	NC_006540.1	Vertebrata;Gnathostomata;Teleostomi;Euteleostomi;Actinopterygii;Actinopteri;Neopterygii;Teleostei;Elopocephalai;Elopocephala;Elopomorpha;Anguilliformes;Anguillidae;Anguilla;Anguilla marmorata	√	√	√	√	√	√	√	√	×	√	√	×
	Anguilla megastoma	NC_006541.1	Vertebrata;Gnathostomata;Teleostomi;Euteleostomi;Actinopterygii;Actinopteri;Neopterygii;Teleostei;Elopocephalai;Elopocephala;Elopomorpha;Anguilliformes;Anguillidae;Anguilla;Anguilla megastoma	√	√	√	√	√	√	√	√	×	√	√	×
	Anguilla mossambica	NC_006542.1	Vertebrata;Gnathostomata;Teleostomi;Euteleostomi;Actinopterygii;Actinopteri;Neopterygii;Teleostei;Elopocephalai;Elopocephala;Elopomorpha;Anguilliformes;Anguillidae;Anguilla;Anguilla mossambica	√	√	√	√	√	√	√	√	×	√	√	√
	Anguilla nebulosa nebulosa	NC_006544.1	Vertebrata;Gnathostomata;Teleostomi;Euteleostomi;Actinopterygii;Actinopteri;Neopterygii;Teleostei;Elopocephalai;Elopocephala;Elopomorpha;Anguilliformes;Anguillidae;Anguilla;Anguilla nebulosa;Anguilla nebulosa nebulosa	√	√	√	√	√	√	√	√	×	√	√	×
	Anguilla obscura	NC_006545.1	Vertebrata;Gnathostomata;Teleostomi;Euteleostomi;Actinopterygii;Actinopteri;Neopterygii;Teleostei;Elopocephalai;Elopocephala;Elopomorpha;Anguilliformes;Anguillidae;Anguilla;Anguilla obscura	√	√	√	√	√	√	√	√	×	√	√	×
	Anguilla reinhardtii	NC_006546.1	Vertebrata;Gnathostomata;Teleostomi;Euteleostomi;Actinopterygii;Actinopteri;Neopterygii;Teleostei;Elopocephalai;Elopocephala;Elopomorpha;Anguilliformes;Anguillidae;Anguilla;Anguilla reinhardtii	√	√	√	√	√	√	√	√	×	√	√	×
	Anguilla rostrata	KJ564271.1	Vertebrata;Gnathostomata;Teleostomi;Euteleostomi;Actinopterygii;Actinopteri;Neopterygii;Teleostei;Elopocephalai;Elopocephala;Elopomorpha;Anguilliformes;Anguillidae;Anguilla;Anguilla rostrata	√	√	√	√	√	√	√	√	×	√	√	×
	Anodontostoma chacunda	NC_021446.1	Vertebrata;Gnathostomata;Teleostomi;Euteleostomi;Actinopterygii;Actinopteri;Neopterygii;Teleostei;Osteoglossocephalai;Clupeocephala;Otomorpha;Clupei;Clupeiformes;Clupeoidei;Clupeidae;Dorosomatinae;Anodontostoma;Anodontostoma chacunda	√	√	√	√	√	√	√	√	×	√	√	×
	Anomalops katoptron	NC_008128.1	Vertebrata;Gnathostomata;Teleostomi;Euteleostomi;Actinopterygii;Actinopteri;Neopterygii;Teleostei;Osteoglossocephalai;Clupeocephala;Euteleosteomorpha;Neoteleostei;Eurypterygia;Ctenosquamata;Acanthomorphata;Euacanthomorphacea;Berycimorphaceae;Trachichthyiformes;Anomalopidae;Anomalops;Anomalops katoptron	√	√	√	√	√	√	√	√	×	√	×	×
	Anoplocapros lenticularis	NC_011319.1	Vertebrata;Gnathostomata;Teleostomi;Euteleostomi;Actinopterygii;Actinopteri;Neopterygii;Teleostei;Osteoglossocephalai;Clupeocephala;Euteleosteomorpha;Neoteleostei;Eurypterygia;Ctenosquamata;Acanthomorphata;Euacanthomorphacea;Percomorphaceae;Eupercaria;Tetraodontiformes;Ostracioidei;Aracanidae;Anoplocapros;Anoplocapros lenticularis	√	√	√	√	√	√	√	√	×	√	×	×
	Anoplogaster cornuta	NC_004391.1	Vertebrata;Gnathostomata;Teleostomi;Euteleostomi;Actinopterygii;Actinopteri;Neopterygii;Teleostei;Osteoglossocephalai;Clupeocephala;Euteleosteomorpha;Neoteleostei;Eurypterygia;Ctenosquamata;Acanthomorphata;Euacanthomorphacea;Berycimorphaceae;Trachichthyiformes;Anoplogasteridae;Anoplogaster;Anoplogaster cornuta	√	√	√	√	√	√	√	√	×	√	×	×
	Anoplopoma fimbria	KP777542.1	Vertebrata;Gnathostomata;Teleostomi;Euteleostomi;Actinopterygii;Actinopteri;Neopterygii;Teleostei;Osteoglossocephalai;Clupeocephala;Euteleosteomorpha;Neoteleostei;Eurypterygia;Ctenosquamata;Acanthomorphata;Euacanthomorphacea;Percomorphaceae;Eupercaria;Perciformes;Cottioidei;Anoplopomatales;Anoplopomatidae;Anoplopoma;Anoplopoma fimbria	√	√	√	√	√	√	√	√	×	√	√	×
	Antigonia capros	NC_003191.1	Vertebrata;Gnathostomata;Teleostomi;Euteleostomi;Actinopterygii;Actinopteri;Neopterygii;Teleostei;Osteoglossocephalai;Clupeocephala;Euteleosteomorpha;Neoteleostei;Eurypterygia;Ctenosquamata;Acanthomorphata;Euacanthomorphacea;Percomorphaceae;Eupercaria;Caproiformes;Caproidae;Antigonia;Antigonia capros	√	√	√	√	√	√	√	√	×	√	√	×
	Anyperodon leucogrammicus	GQ131336.1	Vertebrata;Gnathostomata;Teleostomi;Euteleostomi;Actinopterygii;Actinopteri;Neopterygii;Teleostei;Osteoglossocephalai;Clupeocephala;Euteleosteomorpha;Neoteleostei;Eurypterygia;Ctenosquamata;Acanthomorphata;Euacanthomorphacea;Percomorphaceae;Eupercaria;Perciformes;Serranoidei;Serranidae;Epinephelinae;Epinephelini;Anyperodon;Anyperodon leucogrammicus	√	√	√	√	√	√	√	√	×	√	√	×
	Apareiodon affinis	NC_015834.1	Vertebrata;Gnathostomata;Teleostomi;Euteleostomi;Actinopterygii;Actinopteri;Neopterygii;Teleostei;Osteoglossocephalai;Clupeocephala;Otomorpha;Ostariophysi;Otophysi;Characiphysae;Characiformes;Characoidei;Parodontidae;Apareiodon;Apareiodon affinis	√	√	√	√	√	√	√	√	√	√	√	×
	Apeltes quadracus	NC_011580.1	Vertebrata;Gnathostomata;Teleostomi;Euteleostomi;Actinopterygii;Actinopteri;Neopterygii;Teleostei;Osteoglossocephalai;Clupeocephala;Euteleosteomorpha;Neoteleostei;Eurypterygia;Ctenosquamata;Acanthomorphata;Euacanthomorphacea;Percomorphaceae;Eupercaria;Perciformes;Cottioidei;Gasterosteales;Gasterosteidae;Apeltes;Apeltes quadracus	√	√	×	√	√	√	√	√	×	√	√	×
	Aperioptus gracilentus	NC_029438.1	Vertebrata;Gnathostomata;Teleostomi;Euteleostomi;Actinopterygii;Actinopteri;Neopterygii;Teleostei;Osteoglossocephalai;Clupeocephala;Otomorpha;Ostariophysi;Otophysi;Cypriniphysae;Cypriniformes;Cobitoidei;Cobitidae;Cobitinae;Aperioptus;Aperioptus gracilentus	√	√	√	√	√	√	√	√	√	√	√	×
	Aphanopus carbo	NC_022506.1	Vertebrata;Gnathostomata;Teleostomi;Euteleostomi;Actinopterygii;Actinopteri;Neopterygii;Teleostei;Osteoglossocephalai;Clupeocephala;Euteleosteomorpha;Neoteleostei;Eurypterygia;Ctenosquamata;Acanthomorphata;Euacanthomorphacea;Percomorphaceae;Pelagiaria;Scombriformes;Trichiuridae;Aphanopodinae;Aphanopus;Aphanopus carbo	√	√	√	√	√	×	√	√	×	√	×	×
	Aphredoderus sayanus	NC_004372.1	Vertebrata;Gnathostomata;Teleostomi;Euteleostomi;Actinopterygii;Actinopteri;Neopterygii;Teleostei;Osteoglossocephalai;Clupeocephala;Euteleosteomorpha;Neoteleostei;Eurypterygia;Ctenosquamata;Acanthomorphata;Paracanthopterygii;Percopsaria;Percopsiformes;Aphredoderoidei;Aphredoderidae;Aphredoderus;Aphredoderus sayanus	√	√	×	√	√	√	√	√	√	√	√	×
	Aphyocypris arcus	MG818719.1	Vertebrata;Gnathostomata;Teleostomi;Euteleostomi;Actinopterygii;Actinopteri;Neopterygii;Teleostei;Osteoglossocephalai;Clupeocephala;Otomorpha;Ostariophysi;Otophysi;Cypriniphysae;Cypriniformes;Cyprinoidei;Xenocyprididae;Xenocypridinae;Aphyocypris;Aphyocypris arcus	√	√	√	√	√	√	√	√	√	√	√	×
	Aphyocypris chinensis	NC_008650.1	Vertebrata;Gnathostomata;Teleostomi;Euteleostomi;Actinopterygii;Actinopteri;Neopterygii;Teleostei;Osteoglossocephalai;Clupeocephala;Otomorpha;Ostariophysi;Otophysi;Cypriniphysae;Cypriniformes;Cyprinoidei;Xenocyprididae;Xenocypridinae;Aphyocypris;Aphyocypris chinensis	√	√	√	√	√	√	√	√	√	√	√	×
	Aphyocypris kikuchii	NC_019620.1	Vertebrata;Gnathostomata;Teleostomi;Euteleostomi;Actinopterygii;Actinopteri;Neopterygii;Teleostei;Osteoglossocephalai;Clupeocephala;Otomorpha;Ostariophysi;Otophysi;Cypriniphysae;Cypriniformes;Cyprinoidei;Xenocyprididae;Xenocypridinae;Aphyocypris;Aphyocypris kikuchii	√	√	√	√	√	×	×	×	×	√	×	×
	Aphyocypris moltrechti	NC_019621.1	Vertebrata;Gnathostomata;Teleostomi;Euteleostomi;Actinopterygii;Actinopteri;Neopterygii;Teleostei;Osteoglossocephalai;Clupeocephala;Otomorpha;Ostariophysi;Otophysi;Cypriniphysae;Cypriniformes;Cyprinoidei;Xenocyprididae;Xenocypridinae;Aphyocypris;Aphyocypris moltrechti	√	√	√	√	√	√	√	√	√	√	√	×
	Aphyocypris normalis	NC_015538.1	Vertebrata;Gnathostomata;Teleostomi;Euteleostomi;Actinopterygii;Actinopteri;Neopterygii;Teleostei;Osteoglossocephalai;Clupeocephala;Otomorpha;Ostariophysi;Otophysi;Cypriniphysae;Cypriniformes;Cyprinoidei;Xenocyprididae;Xenocypridinae;Aphyocypris;Aphyocypris normalis	√	√	√	√	√	√	√	√	√	√	√	×
	Aphyocypris pulchrilineata	MK387702.1	Vertebrata;Gnathostomata;Teleostomi;Euteleostomi;Actinopterygii;Actinopteri;Neopterygii;Teleostei;Osteoglossocephalai;Clupeocephala;Otomorpha;Ostariophysi;Otophysi;Cypriniphysae;Cypriniformes;Cyprinoidei;Xenocyprididae;Xenocypridinae;Aphyocypris;Aphyocypris pulchrilineata	√	√	√	√	√	√	√	√	√	√	√	×
	Aphyosemion australe	NC_044451.1	Vertebrata;Gnathostomata;Teleostomi;Euteleostomi;Actinopterygii;Actinopteri;Neopterygii;Teleostei;Osteoglossocephalai;Clupeocephala;Euteleosteomorpha;Neoteleostei;Eurypterygia;Ctenosquamata;Acanthomorphata;Euacanthomorphacea;Percomorphaceae;Ovalentaria;Atherinomorphae;Cyprinodontiformes;Aplocheiloidei;Nothobranchiidae;Aphyosemion;Aphyosemion australe	√	√	√	√	√	√	√	√	√	√	√	×
	Aphyosemion cameronense	NC_044461.1	Vertebrata;Gnathostomata;Teleostomi;Euteleostomi;Actinopterygii;Actinopteri;Neopterygii;Teleostei;Osteoglossocephalai;Clupeocephala;Euteleosteomorpha;Neoteleostei;Eurypterygia;Ctenosquamata;Acanthomorphata;Euacanthomorphacea;Percomorphaceae;Ovalentaria;Atherinomorphae;Cyprinodontiformes;Aplocheiloidei;Nothobranchiidae;Aphyosemion;Aphyosemion cameronense	√	√	√	√	√	√	√	√	√	√	√	×
	Aphyosemion coeleste	NC_044430.1	Vertebrata;Gnathostomata;Teleostomi;Euteleostomi;Actinopterygii;Actinopteri;Neopterygii;Teleostei;Osteoglossocephalai;Clupeocephala;Euteleosteomorpha;Neoteleostei;Eurypterygia;Ctenosquamata;Acanthomorphata;Euacanthomorphacea;Percomorphaceae;Ovalentaria;Atherinomorphae;Cyprinodontiformes;Aplocheiloidei;Nothobranchiidae;Aphyosemion;Aphyosemion coeleste	√	√	√	√	√	√	√	√	√	√	√	×
	Aphyosemion cognatum	NC_044441.1	Vertebrata;Gnathostomata;Teleostomi;Euteleostomi;Actinopterygii;Actinopteri;Neopterygii;Teleostei;Osteoglossocephalai;Clupeocephala;Euteleosteomorpha;Neoteleostei;Eurypterygia;Ctenosquamata;Acanthomorphata;Euacanthomorphacea;Percomorphaceae;Ovalentaria;Atherinomorphae;Cyprinodontiformes;Aplocheiloidei;Nothobranchiidae;Aphyosemion;Aphyosemion cognatum	√	√	√	√	√	√	√	√	√	√	√	×
	Aphyosemion cyanostictum	NC_044454.1	Vertebrata;Gnathostomata;Teleostomi;Euteleostomi;Actinopterygii;Actinopteri;Neopterygii;Teleostei;Osteoglossocephalai;Clupeocephala;Euteleosteomorpha;Neoteleostei;Eurypterygia;Ctenosquamata;Acanthomorphata;Euacanthomorphacea;Percomorphaceae;Ovalentaria;Atherinomorphae;Cyprinodontiformes;Aplocheiloidei;Nothobranchiidae;Aphyosemion;Aphyosemion cyanostictum	√	√	√	√	√	√	√	√	√	√	√	×
	Aphyosemion gabunense	NC_044452.1	Vertebrata;Gnathostomata;Teleostomi;Euteleostomi;Actinopterygii;Actinopteri;Neopterygii;Teleostei;Osteoglossocephalai;Clupeocephala;Euteleosteomorpha;Neoteleostei;Eurypterygia;Ctenosquamata;Acanthomorphata;Euacanthomorphacea;Percomorphaceae;Ovalentaria;Atherinomorphae;Cyprinodontiformes;Aplocheiloidei;Nothobranchiidae;Aphyosemion;Aphyosemion gabunense	√	√	√	√	√	√	√	√	√	√	√	×
	Aphyosemion kouamense	NC_044443.1	Vertebrata;Gnathostomata;Teleostomi;Euteleostomi;Actinopterygii;Actinopteri;Neopterygii;Teleostei;Osteoglossocephalai;Clupeocephala;Euteleosteomorpha;Neoteleostei;Eurypterygia;Ctenosquamata;Acanthomorphata;Euacanthomorphacea;Percomorphaceae;Ovalentaria;Atherinomorphae;Cyprinodontiformes;Aplocheiloidei;Nothobranchiidae;Aphyosemion;Aphyosemion kouamense	√	√	√	√	√	√	√	√	√	√	×	×
	Aphyosemion kunzi	NC_044428.1	Vertebrata;Gnathostomata;Teleostomi;Euteleostomi;Actinopterygii;Actinopteri;Neopterygii;Teleostei;Osteoglossocephalai;Clupeocephala;Euteleosteomorpha;Neoteleostei;Eurypterygia;Ctenosquamata;Acanthomorphata;Euacanthomorphacea;Percomorphaceae;Ovalentaria;Atherinomorphae;Cyprinodontiformes;Aplocheiloidei;Nothobranchiidae;Aphyosemion;Aphyosemion kunzi	√	√	√	√	√	√	√	√	√	√	√	×
	Aplocheilus lineatus	NC_044433.1	Vertebrata;Gnathostomata;Teleostomi;Euteleostomi;Actinopterygii;Actinopteri;Neopterygii;Teleostei;Osteoglossocephalai;Clupeocephala;Euteleosteomorpha;Neoteleostei;Eurypterygia;Ctenosquamata;Acanthomorphata;Euacanthomorphacea;Percomorphaceae;Ovalentaria;Atherinomorphae;Cyprinodontiformes;Aplocheiloidei;Aplocheilidae;Aplocheilus;Aplocheilus lineatus	√	√	√	√	√	√	√	√	√	√	×	×
	Aplocheilus panchax	NC_011176.1	Vertebrata;Gnathostomata;Teleostomi;Euteleostomi;Actinopterygii;Actinopteri;Neopterygii;Teleostei;Osteoglossocephalai;Clupeocephala;Euteleosteomorpha;Neoteleostei;Eurypterygia;Ctenosquamata;Acanthomorphata;Euacanthomorphacea;Percomorphaceae;Ovalentaria;Atherinomorphae;Cyprinodontiformes;Aplocheiloidei;Aplocheilidae;Aplocheilus;Aplocheilus panchax	√	√	√	√	√	√	√	√	√	√	√	×
	Aplodinotus grunniens	MG599474.1	Vertebrata;Gnathostomata;Teleostomi;Euteleostomi;Actinopterygii;Actinopteri;Neopterygii;Teleostei;Osteoglossocephalai;Clupeocephala;Euteleosteomorpha;Neoteleostei;Eurypterygia;Ctenosquamata;Acanthomorphata;Euacanthomorphacea;Percomorphaceae;Eupercaria;Eupercaria incertae sedis;Sciaenidae;Aplodinotus;Aplodinotus grunniens	√	√	√	√	√	√	√	√	×	√	√	×
	Apocryptodon punctatus	KJ434599.1	Vertebrata;Gnathostomata;Teleostomi;Euteleostomi;Actinopterygii;Actinopteri;Neopterygii;Teleostei;Osteoglossocephalai;Clupeocephala;Euteleosteomorpha;Neoteleostei;Eurypterygia;Ctenosquamata;Acanthomorphata;Euacanthomorphacea;Percomorphaceae;Gobiaria;Gobiiformes;Gobioidei;Gobiidae;Oxudercinae;Apocryptodon;Apocryptodon punctatus	√	√	√	√	√	√	√	√	√	√	√	×
	Apogon semilineatus	NC_022510.1	Vertebrata;Gnathostomata;Teleostomi;Euteleostomi;Actinopterygii;Actinopteri;Neopterygii;Teleostei;Osteoglossocephalai;Clupeocephala;Euteleosteomorpha;Neoteleostei;Eurypterygia;Ctenosquamata;Acanthomorphata;Euacanthomorphacea;Percomorphaceae;Gobiaria;Kurtiformes;Apogonoidei;Apogonidae;Apogoninae;Apogon;Apogon incertae sedis;Apogon semilineatus	√	√	√	√	√	√	√	√	√	√	√	×
	Apolemichthys arcuatus	KP965871.1	Vertebrata;Gnathostomata;Teleostomi;Euteleostomi;Actinopterygii;Actinopteri;Neopterygii;Teleostei;Osteoglossocephalai;Clupeocephala;Euteleosteomorpha;Neoteleostei;Eurypterygia;Ctenosquamata;Acanthomorphata;Euacanthomorphacea;Percomorphaceae;Eupercaria;Eupercaria incertae sedis;Pomacanthidae;Apolemichthys;Apolemichthys arcuatus	√	√	√	√	√	√	√	√	×	√	√	×
	Apolemichthys armitagei	NC_027857.1	Vertebrata;Gnathostomata;Teleostomi;Euteleostomi;Actinopterygii;Actinopteri;Neopterygii;Teleostei;Osteoglossocephalai;Clupeocephala;Euteleosteomorpha;Neoteleostei;Eurypterygia;Ctenosquamata;Acanthomorphata;Euacanthomorphacea;Percomorphaceae;Eupercaria;Eupercaria incertae sedis;Pomacanthidae;Apolemichthys;Apolemichthys armitagei	√	√	√	√	√	√	√	√	×	√	√	×
	Apolemichthys griffisi	NC_027592.1	Vertebrata;Gnathostomata;Teleostomi;Euteleostomi;Actinopterygii;Actinopteri;Neopterygii;Teleostei;Osteoglossocephalai;Clupeocephala;Euteleosteomorpha;Neoteleostei;Eurypterygia;Ctenosquamata;Acanthomorphata;Euacanthomorphacea;Percomorphaceae;Eupercaria;Eupercaria incertae sedis;Pomacanthidae;Apolemichthys;Apolemichthys griffisi	√	√	√	√	√	√	√	√	×	√	√	×
	Apolemichthys kingi	NC_026520.1	Vertebrata;Gnathostomata;Teleostomi;Euteleostomi;Actinopterygii;Actinopteri;Neopterygii;Teleostei;Osteoglossocephalai;Clupeocephala;Euteleosteomorpha;Neoteleostei;Eurypterygia;Ctenosquamata;Acanthomorphata;Euacanthomorphacea;Percomorphaceae;Eupercaria;Eupercaria incertae sedis;Pomacanthidae;Apolemichthys;Apolemichthys kingi	√	√	√	√	√	√	√	√	×	√	√	×
	Apteronotus albifrons	NC_004692.1	Vertebrata;Gnathostomata;Teleostomi;Euteleostomi;Actinopterygii;Actinopteri;Neopterygii;Teleostei;Osteoglossocephalai;Clupeocephala;Otomorpha;Ostariophysi;Otophysi;Characiphysae;Gymnotiformes;Sternopygoidei;Apteronotidae;Apteronotus;Apteronotus albifrons	√	√	√	√	√	√	√	√	√	√	√	×
	Apteronotus rostratus	MH399592.2	Vertebrata;Gnathostomata;Teleostomi;Euteleostomi;Actinopterygii;Actinopteri;Neopterygii;Teleostei;Osteoglossocephalai;Clupeocephala;Otomorpha;Ostariophysi;Otophysi;Characiphysae;Gymnotiformes;Sternopygoidei;Apteronotidae;Apteronotus;Apteronotus rostratus	√	√	√	√	√	√	√	√	√	√	√	×
	Aptocyclus ventricosus	NC_008129.1	Vertebrata;Gnathostomata;Teleostomi;Euteleostomi;Actinopterygii;Actinopteri;Neopterygii;Teleostei;Osteoglossocephalai;Clupeocephala;Euteleosteomorpha;Neoteleostei;Eurypterygia;Ctenosquamata;Acanthomorphata;Euacanthomorphacea;Percomorphaceae;Eupercaria;Perciformes;Cottioidei;Cottales;Cyclopteridae;Aptocyclinae;Aptocyclus;Aptocyclus ventricosus	√	√	√	√	√	√	√	√	×	√	×	×
	Arapaima gigas	EF523611.1	Vertebrata;Gnathostomata;Teleostomi;Euteleostomi;Actinopterygii;Actinopteri;Neopterygii;Teleostei;Osteoglossocephalai;Osteoglossocephala;Osteoglossomorpha;Osteoglossiformes;Osteoglossidae;Arapaima;Arapaima gigas	√	√	√	√	√	√	√	√	√	√	√	×
	Archiaphyosemion guineense	NC_044453.1	Vertebrata;Gnathostomata;Teleostomi;Euteleostomi;Actinopterygii;Actinopteri;Neopterygii;Teleostei;Osteoglossocephalai;Clupeocephala;Euteleosteomorpha;Neoteleostei;Eurypterygia;Ctenosquamata;Acanthomorphata;Euacanthomorphacea;Percomorphaceae;Ovalentaria;Atherinomorphae;Cyprinodontiformes;Aplocheiloidei;Nothobranchiidae;Archiaphyosemion;Archiaphyosemion guineense	√	√	√	√	√	√	√	√	√	√	√	×
	Arctogadus glacialis	NC_010122.1	Vertebrata;Gnathostomata;Teleostomi;Euteleostomi;Actinopterygii;Actinopteri;Neopterygii;Teleostei;Osteoglossocephalai;Clupeocephala;Euteleosteomorpha;Neoteleostei;Eurypterygia;Ctenosquamata;Acanthomorphata;Paracanthopterygii;Zeiogadaria;Gadariae;Gadiformes;Gadoidei;Gadidae;Arctogadus;Arctogadus glacialis	√	√	×	√	√	√	√	√	×	√	√	×
	Arctoscopus japonicus	NC_002812.1	Vertebrata;Gnathostomata;Teleostomi;Euteleostomi;Actinopterygii;Actinopteri;Neopterygii;Teleostei;Osteoglossocephalai;Clupeocephala;Euteleosteomorpha;Neoteleostei;Eurypterygia;Ctenosquamata;Acanthomorphata;Euacanthomorphacea;Percomorphaceae;Eupercaria;Perciformes;Cottioidei;Cottales;Trichodontidae;Arctoscopus;Arctoscopus japonicus	×	×	√	×	×	√	√	√	×	√	√	×
	Argyrosomus amoyensis	NC_025937.1	Vertebrata;Gnathostomata;Teleostomi;Euteleostomi;Actinopterygii;Actinopteri;Neopterygii;Teleostei;Osteoglossocephalai;Clupeocephala;Euteleosteomorpha;Neoteleostei;Eurypterygia;Ctenosquamata;Acanthomorphata;Euacanthomorphacea;Percomorphaceae;Eupercaria;Eupercaria incertae sedis;Sciaenidae;Argyrosomus;Argyrosomus amoyensis	√	√	√	√	√	√	√	√	×	√	√	×
	Argyrosomus japonicus	KT184692.1	Vertebrata;Gnathostomata;Teleostomi;Euteleostomi;Actinopterygii;Actinopteri;Neopterygii;Teleostei;Osteoglossocephalai;Clupeocephala;Euteleosteomorpha;Neoteleostei;Eurypterygia;Ctenosquamata;Acanthomorphata;Euacanthomorphacea;Percomorphaceae;Eupercaria;Eupercaria incertae sedis;Sciaenidae;Argyrosomus;Argyrosomus japonicus	√	√	√	√	√	√	√	√	×	√	√	×
	Ariomma indicum	NC_022498.1	Vertebrata;Gnathostomata;Teleostomi;Euteleostomi;Actinopterygii;Actinopteri;Neopterygii;Teleostei;Osteoglossocephalai;Clupeocephala;Euteleosteomorpha;Neoteleostei;Eurypterygia;Ctenosquamata;Acanthomorphata;Euacanthomorphacea;Percomorphaceae;Pelagiaria;Scombriformes;Ariommatidae;Ariomma;Ariomma indicum	√	√	√	√	√	√	√	√	×	√	√	×
	Ariomma lurida	NC_022497.1	Vertebrata;Gnathostomata;Teleostomi;Euteleostomi;Actinopterygii;Actinopteri;Neopterygii;Teleostei;Osteoglossocephalai;Clupeocephala;Euteleosteomorpha;Neoteleostei;Eurypterygia;Ctenosquamata;Acanthomorphata;Euacanthomorphacea;Percomorphaceae;Pelagiaria;Scombriformes;Ariommatidae;Ariomma;Ariomma lurida	√	√	√	√	√	√	√	√	×	√	√	×
	Ariopsis seemanni	AP012003.1	Vertebrata;Gnathostomata;Teleostomi;Euteleostomi;Actinopterygii;Actinopteri;Neopterygii;Teleostei;Osteoglossocephalai;Clupeocephala;Otomorpha;Ostariophysi;Otophysi;Characiphysae;Siluriformes;Siluroidei;Ariidae;Ariopsis;Ariopsis seemanni	√	√	√	√	√	√	√	√	√	√	√	×
	Ariosoma meeki	KX641476.1	Vertebrata;Gnathostomata;Teleostomi;Euteleostomi;Actinopterygii;Actinopteri;Neopterygii;Teleostei;Elopocephalai;Elopocephala;Elopomorpha;Anguilliformes;Congridae;Bathymyrinae;Ariosoma;Ariosoma meeki	√	√	×	√	√	√	√	√	×	√	√	×
	Ariosoma shiroanago	NC_013632.1	Vertebrata;Gnathostomata;Teleostomi;Euteleostomi;Actinopterygii;Actinopteri;Neopterygii;Teleostei;Elopocephalai;Elopocephala;Elopomorpha;Anguilliformes;Congridae;Bathymyrinae;Ariosoma;Ariosoma shiroanago	√	√	√	√	√	√	√	√	×	√	√	×
	Arius arius	NC_036673.1	Vertebrata;Gnathostomata;Teleostomi;Euteleostomi;Actinopterygii;Actinopteri;Neopterygii;Teleostei;Osteoglossocephalai;Clupeocephala;Otomorpha;Ostariophysi;Otophysi;Characiphysae;Siluriformes;Siluroidei;Ariidae;Arius;Arius arius	√	√	√	√	√	√	√	√	√	√	√	×
	Arius dispar	NC_048969.1	Vertebrata;Gnathostomata;Teleostomi;Euteleostomi;Actinopterygii;Actinopteri;Neopterygii;Teleostei;Osteoglossocephalai;Clupeocephala;Otomorpha;Ostariophysi;Otophysi;Characiphysae;Siluriformes;Siluroidei;Ariidae;Arius;Arius dispar	√	√	√	√	√	√	√	√	√	√	√	×
	Arius maculatus	NC_045222.1	Vertebrata;Gnathostomata;Teleostomi;Euteleostomi;Actinopterygii;Actinopteri;Neopterygii;Teleostei;Osteoglossocephalai;Clupeocephala;Otomorpha;Ostariophysi;Otophysi;Characiphysae;Siluriformes;Siluroidei;Ariidae;Arius;Arius maculatus	√	√	√	√	√	√	√	√	√	√	√	×
	Arnoglossus tenuis	NC_044494.1	Vertebrata;Gnathostomata;Teleostomi;Euteleostomi;Actinopterygii;Actinopteri;Neopterygii;Teleostei;Osteoglossocephalai;Clupeocephala;Euteleosteomorpha;Neoteleostei;Eurypterygia;Ctenosquamata;Acanthomorphata;Euacanthomorphacea;Percomorphaceae;Carangaria;Pleuronectiformes;Pleuronectoidei;Bothidae;Arnoglossus;Arnoglossus tenuis	√	√	√	√	×	√	√	√	×	√	√	×
	Arothron firmamentum	AP006742.1	Vertebrata;Gnathostomata;Teleostomi;Euteleostomi;Actinopterygii;Actinopteri;Neopterygii;Teleostei;Osteoglossocephalai;Clupeocephala;Euteleosteomorpha;Neoteleostei;Eurypterygia;Ctenosquamata;Acanthomorphata;Euacanthomorphacea;Percomorphaceae;Eupercaria;Tetraodontiformes;Tetraodontoidei;Tetradontoidea;Tetraodontidae;Arothron;Arothron firmamentum	√	√	√	√	√	√	√	√	×	√	√	×
	Arothron hispidus	NC_015336.1	Vertebrata;Gnathostomata;Teleostomi;Euteleostomi;Actinopterygii;Actinopteri;Neopterygii;Teleostei;Osteoglossocephalai;Clupeocephala;Euteleosteomorpha;Neoteleostei;Eurypterygia;Ctenosquamata;Acanthomorphata;Euacanthomorphacea;Percomorphaceae;Eupercaria;Tetraodontiformes;Tetraodontoidei;Tetradontoidea;Tetraodontidae;Arothron;Arothron hispidus	√	√	√	√	√	√	√	√	×	√	×	×
	Arothron manilensis	NC_015371.1	Vertebrata;Gnathostomata;Teleostomi;Euteleostomi;Actinopterygii;Actinopteri;Neopterygii;Teleostei;Osteoglossocephalai;Clupeocephala;Euteleosteomorpha;Neoteleostei;Eurypterygia;Ctenosquamata;Acanthomorphata;Euacanthomorphacea;Percomorphaceae;Eupercaria;Tetraodontiformes;Tetraodontoidei;Tetradontoidea;Tetraodontidae;Arothron;Arothron manilensis	√	√	√	√	√	√	√	√	×	√	×	×
	Arothron mappa	AP011931.1	Vertebrata;Gnathostomata;Teleostomi;Euteleostomi;Actinopterygii;Actinopteri;Neopterygii;Teleostei;Osteoglossocephalai;Clupeocephala;Euteleosteomorpha;Neoteleostei;Eurypterygia;Ctenosquamata;Acanthomorphata;Euacanthomorphacea;Percomorphaceae;Eupercaria;Tetraodontiformes;Tetraodontoidei;Tetradontoidea;Tetraodontidae;Arothron;Arothron mappa	√	√	√	√	√	√	√	√	×	√	×	×
	Arripis trutta	NC_015787.1	Vertebrata;Gnathostomata;Teleostomi;Euteleostomi;Actinopterygii;Actinopteri;Neopterygii;Teleostei;Osteoglossocephalai;Clupeocephala;Euteleosteomorpha;Neoteleostei;Eurypterygia;Ctenosquamata;Acanthomorphata;Euacanthomorphacea;Percomorphaceae;Pelagiaria;Scombriformes;Arripidae;Arripis;Arripis trutta	√	√	√	√	√	√	√	√	×	√	√	×
	Aseraggodes kobensis	NC_024285.1	Vertebrata;Gnathostomata;Teleostomi;Euteleostomi;Actinopterygii;Actinopteri;Neopterygii;Teleostei;Osteoglossocephalai;Clupeocephala;Euteleosteomorpha;Neoteleostei;Eurypterygia;Ctenosquamata;Acanthomorphata;Euacanthomorphacea;Percomorphaceae;Carangaria;Pleuronectiformes;Pleuronectoidei;Soleidae;Aseraggodes;Aseraggodes kobensis	√	√	√	√	√	√	√	√	×	√	×	×
	Aspasma minima	NC_008130.1	Vertebrata;Gnathostomata;Teleostomi;Euteleostomi;Actinopterygii;Actinopteri;Neopterygii;Teleostei;Osteoglossocephalai;Clupeocephala;Euteleosteomorpha;Neoteleostei;Eurypterygia;Ctenosquamata;Acanthomorphata;Euacanthomorphacea;Percomorphaceae;Ovalentaria;Blenniimorphae;Blenniiformes;Gobiesocoidei;Gobiesocidae;Gobiesocinae;Aspasma;Aspasma minima	√	√	√	√	√	√	√	√	×	√	√	×
	Aspiorhynchus laticeps	KY436760.1	Vertebrata;Gnathostomata;Teleostomi;Euteleostomi;Actinopterygii;Actinopteri;Neopterygii;Teleostei;Osteoglossocephalai;Clupeocephala;Otomorpha;Ostariophysi;Otophysi;Cypriniphysae;Cypriniformes;Cyprinoidei;Cyprinidae;Schizothoracinae;Aspiorhynchus;Aspiorhynchus laticeps	√	√	×	√	√	√	√	√	√	√	√	×
	Assurger anzac	NC_022494.1	Vertebrata;Gnathostomata;Teleostomi;Euteleostomi;Actinopterygii;Actinopteri;Neopterygii;Teleostei;Osteoglossocephalai;Clupeocephala;Euteleosteomorpha;Neoteleostei;Eurypterygia;Ctenosquamata;Acanthomorphata;Euacanthomorphacea;Percomorphaceae;Pelagiaria;Scombriformes;Trichiuridae;Lepidopodinae;Assurger;Assurger anzac	√	√	√	√	√	×	√	√	×	√	×	×
	Astatotilapia calliptera	NC_018560.1	Vertebrata;Gnathostomata;Teleostomi;Euteleostomi;Actinopterygii;Actinopteri;Neopterygii;Teleostei;Osteoglossocephalai;Clupeocephala;Euteleosteomorpha;Neoteleostei;Eurypterygia;Ctenosquamata;Acanthomorphata;Euacanthomorphacea;Percomorphaceae;Ovalentaria;Cichlomorphae;Cichliformes;Cichlidae;African cichlids;Pseudocrenilabrinae;Haplochromini;Astatotilapia;Astatotilapia calliptera	√	√	√	√	√	√	√	√	×	√	√	×
	Asterorhombus intermedius	NC_044725.1	Vertebrata;Gnathostomata;Teleostomi;Euteleostomi;Actinopterygii;Actinopteri;Neopterygii;Teleostei;Osteoglossocephalai;Clupeocephala;Euteleosteomorpha;Neoteleostei;Eurypterygia;Ctenosquamata;Acanthomorphata;Euacanthomorphacea;Percomorphaceae;Carangaria;Pleuronectiformes;Pleuronectoidei;Bothidae;Asterorhombus;Asterorhombus intermedius	√	√	√	√	×	√	√	√	√	√	√	×
	Astroblepus sp. NM-2010	AP012004.1	Vertebrata;Gnathostomata;Teleostomi;Euteleostomi;Actinopterygii;Actinopteri;Neopterygii;Teleostei;Osteoglossocephalai;Clupeocephala;Otomorpha;Ostariophysi;Otophysi;Characiphysae;Siluriformes;Loricarioidei;Astroblepidae;Astroblepus;unclassified Astroblepus;Astroblepus sp. NM-2010	√	√	√	√	√	√	√	√	√	√	√	×
	Astronotus ocellatus	NC_009058.1	Vertebrata;Gnathostomata;Teleostomi;Euteleostomi;Actinopterygii;Actinopteri;Neopterygii;Teleostei;Osteoglossocephalai;Clupeocephala;Euteleosteomorpha;Neoteleostei;Eurypterygia;Ctenosquamata;Acanthomorphata;Euacanthomorphacea;Percomorphaceae;Ovalentaria;Cichlomorphae;Cichliformes;Cichlidae;New World cichlids;Astronotinae;Astronotini;Astronotus;Astronotus ocellatus	√	√	√	√	√	√	√	√	×	√	√	×
	Astyanax altiparanae	MT428072.1	Vertebrata;Gnathostomata;Teleostomi;Euteleostomi;Actinopterygii;Actinopteri;Neopterygii;Teleostei;Osteoglossocephalai;Clupeocephala;Otomorpha;Ostariophysi;Otophysi;Characiphysae;Characiformes;Characoidei;Characidae;Stethaprioninae;Astyanax;Astyanax altiparanae	√	√	√	√	√	√	√	√	√	√	√	×
	Astyanax lacustris	MT428067.1	Vertebrata;Gnathostomata;Teleostomi;Euteleostomi;Actinopterygii;Actinopteri;Neopterygii;Teleostei;Osteoglossocephalai;Clupeocephala;Otomorpha;Ostariophysi;Otophysi;Characiphysae;Characiformes;Characoidei;Characidae;Stethaprioninae;Astyanax;Astyanax lacustris	√	√	√	√	√	√	√	√	√	√	√	×
	Astyanax mexicanus	AP011982.1	Vertebrata;Gnathostomata;Teleostomi;Euteleostomi;Actinopterygii;Actinopteri;Neopterygii;Teleostei;Osteoglossocephalai;Clupeocephala;Otomorpha;Ostariophysi;Otophysi;Characiphysae;Characiformes;Characoidei;Characidae;Stethaprioninae;Astyanax;Astyanax mexicanus	√	√	√	√	√	√	√	√	√	√	√	×
	Astyanax sp. n. IRO-2020	MT428068.1	Vertebrata;Gnathostomata;Teleostomi;Euteleostomi;Actinopterygii;Actinopteri;Neopterygii;Teleostei;Osteoglossocephalai;Clupeocephala;Otomorpha;Ostariophysi;Otophysi;Characiphysae;Characiformes;Characoidei;Characidae;Stethaprioninae;Astyanax;unclassified Astyanax;Astyanax sp. n. IRO-2020	×	×	×	×	×	×	×	×	×	×	×	×
	Ataxolepis apus	NC_012045.1	Vertebrata;Gnathostomata;Teleostomi;Euteleostomi;Actinopterygii;Actinopteri;Neopterygii;Teleostei;Osteoglossocephalai;Clupeocephala;Euteleosteomorpha;Neoteleostei;Eurypterygia;Ctenosquamata;Acanthomorphata;Euacanthomorphacea;Berycimorphaceae;Beryciformes;Cetomimidae;Ataxolepis;Ataxolepis apus	√	√	√	√	√	√	√	√	×	√	√	×
	Ateleopus japonicus	NC_003178.1	Vertebrata;Gnathostomata;Teleostomi;Euteleostomi;Actinopterygii;Actinopteri;Neopterygii;Teleostei;Osteoglossocephalai;Clupeocephala;Euteleosteomorpha;Neoteleostei;Ateleopodia;Ateleopodiformes;Ateleopodidae;Ateleopus;Ateleopus japonicus	√	√	√	√	√	√	√	√	√	√	√	×
	Atherinosoma microstoma	NC_035147.1	Vertebrata;Gnathostomata;Teleostomi;Euteleostomi;Actinopterygii;Actinopteri;Neopterygii;Teleostei;Osteoglossocephalai;Clupeocephala;Euteleosteomorpha;Neoteleostei;Eurypterygia;Ctenosquamata;Acanthomorphata;Euacanthomorphacea;Percomorphaceae;Ovalentaria;Atherinomorphae;Atheriniformes;Atherinidae;Atherininae;Atherinosoma;Atherinosoma microstoma	√	√	√	√	√	√	√	√	×	√	√	×
	Atractosteus spatula	NC_008131.1	Vertebrata;Gnathostomata;Teleostomi;Euteleostomi;Actinopterygii;Actinopteri;Neopterygii;Holostei;Semionotiformes;Lepisosteidae;Atractosteus;Atractosteus spatula	√	√	√	√	√	√	√	√	√	√	×	×
	Atractosteus tristoechus	NC_036329.1	Vertebrata;Gnathostomata;Teleostomi;Euteleostomi;Actinopterygii;Actinopteri;Neopterygii;Holostei;Semionotiformes;Lepisosteidae;Atractosteus;Atractosteus tristoechus	√	√	√	√	√	√	√	√	√	√	×	×
	Atractosteus tropicus	NC_024178.1	Vertebrata;Gnathostomata;Teleostomi;Euteleostomi;Actinopterygii;Actinopteri;Neopterygii;Holostei;Semionotiformes;Lepisosteidae;Atractosteus;Atractosteus tropicus	√	√	√	√	√	√	√	√	√	√	×	×
	Atrobucca nibe	MK530652.1	Vertebrata;Gnathostomata;Teleostomi;Euteleostomi;Actinopterygii;Actinopteri;Neopterygii;Teleostei;Osteoglossocephalai;Clupeocephala;Euteleosteomorpha;Neoteleostei;Eurypterygia;Ctenosquamata;Acanthomorphata;Euacanthomorphacea;Percomorphaceae;Eupercaria;Eupercaria incertae sedis;Sciaenidae;Atrobucca;Atrobucca nibe	√	√	√	√	√	√	√	√	×	√	√	×
	Atule mate	NC_026222.1	Vertebrata;Gnathostomata;Teleostomi;Euteleostomi;Actinopterygii;Actinopteri;Neopterygii;Teleostei;Osteoglossocephalai;Clupeocephala;Euteleosteomorpha;Neoteleostei;Eurypterygia;Ctenosquamata;Acanthomorphata;Euacanthomorphacea;Percomorphaceae;Carangaria;Carangiformes;Carangidae;Atule;Atule mate	√	√	√	√	√	√	√	√	×	√	√	×
	Auchenoglanis occidentalis	MF124303.1	Vertebrata;Gnathostomata;Teleostomi;Euteleostomi;Actinopterygii;Actinopteri;Neopterygii;Teleostei;Osteoglossocephalai;Clupeocephala;Otomorpha;Ostariophysi;Otophysi;Characiphysae;Siluriformes;Siluroidei;Auchenoglanididae;Auchenoglanis;Auchenoglanis occidentalis	√	√	√	√	√	√	√	√	√	√	√	×
	Aulichthys japonicus	NC_011569.1	Vertebrata;Gnathostomata;Teleostomi;Euteleostomi;Actinopterygii;Actinopteri;Neopterygii;Teleostei;Osteoglossocephalai;Clupeocephala;Euteleosteomorpha;Neoteleostei;Eurypterygia;Ctenosquamata;Acanthomorphata;Euacanthomorphacea;Percomorphaceae;Eupercaria;Perciformes;Cottioidei;Gasterosteales;Aulorhynchidae;Aulichthys;Aulichthys japonicus	√	√	√	√	√	√	√	√	×	√	√	×
	Aulonocara stuartgranti	NC_029380.1	Vertebrata;Gnathostomata;Teleostomi;Euteleostomi;Actinopterygii;Actinopteri;Neopterygii;Teleostei;Osteoglossocephalai;Clupeocephala;Euteleosteomorpha;Neoteleostei;Eurypterygia;Ctenosquamata;Acanthomorphata;Euacanthomorphacea;Percomorphaceae;Ovalentaria;Cichlomorphae;Cichliformes;Cichlidae;African cichlids;Pseudocrenilabrinae;Haplochromini;Aulonocara;Aulonocara stuartgranti	√	√	√	√	√	√	√	√	×	√	√	×
	Aulorhynchus flavidus	NC_010268.1	Vertebrata;Gnathostomata;Teleostomi;Euteleostomi;Actinopterygii;Actinopteri;Neopterygii;Teleostei;Osteoglossocephalai;Clupeocephala;Euteleosteomorpha;Neoteleostei;Eurypterygia;Ctenosquamata;Acanthomorphata;Euacanthomorphacea;Percomorphaceae;Eupercaria;Perciformes;Cottioidei;Gasterosteales;Aulorhynchidae;Aulorhynchus;Aulorhynchus flavidus	√	√	√	√	√	√	√	√	×	√	√	×
	Aulostomus chinensis	NC_010269.1	Vertebrata;Gnathostomata;Teleostomi;Euteleostomi;Actinopterygii;Actinopteri;Neopterygii;Teleostei;Osteoglossocephalai;Clupeocephala;Euteleosteomorpha;Neoteleostei;Eurypterygia;Ctenosquamata;Acanthomorphata;Euacanthomorphacea;Percomorphaceae;Syngnathiaria;Syngnathiformes;Syngnathiformes incertae sedis;Aulostomidae;Aulostomus;Aulostomus chinensis	√	√	√	√	√	×	√	√	×	√	×	×
	Auriglobus modestus	NC_015348.1	Vertebrata;Gnathostomata;Teleostomi;Euteleostomi;Actinopterygii;Actinopteri;Neopterygii;Teleostei;Osteoglossocephalai;Clupeocephala;Euteleosteomorpha;Neoteleostei;Eurypterygia;Ctenosquamata;Acanthomorphata;Euacanthomorphacea;Percomorphaceae;Eupercaria;Tetraodontiformes;Tetraodontoidei;Tetradontoidea;Tetraodontidae;Auriglobus;Auriglobus modestus	√	√	√	√	√	√	√	√	×	√	√	×
	Austrolebias charrua	NC_028510.1	Vertebrata;Gnathostomata;Teleostomi;Euteleostomi;Actinopterygii;Actinopteri;Neopterygii;Teleostei;Osteoglossocephalai;Clupeocephala;Euteleosteomorpha;Neoteleostei;Eurypterygia;Ctenosquamata;Acanthomorphata;Euacanthomorphacea;Percomorphaceae;Ovalentaria;Atherinomorphae;Cyprinodontiformes;Aplocheiloidei;Rivulidae;Austrolebias;Austrolebias charrua	√	√	√	√	√	√	√	√	×	√	√	×
	Auxis rochei	MK548578.1	Vertebrata;Gnathostomata;Teleostomi;Euteleostomi;Actinopterygii;Actinopteri;Neopterygii;Teleostei;Osteoglossocephalai;Clupeocephala;Euteleosteomorpha;Neoteleostei;Eurypterygia;Ctenosquamata;Acanthomorphata;Euacanthomorphacea;Percomorphaceae;Pelagiaria;Scombriformes;Scombridae;Scombrinae;Thunnini;Auxis;Auxis rochei	√	√	√	√	√	√	√	√	×	√	√	×
	Auxis thazard	MK801690.1	Vertebrata;Gnathostomata;Teleostomi;Euteleostomi;Actinopterygii;Actinopteri;Neopterygii;Teleostei;Osteoglossocephalai;Clupeocephala;Euteleosteomorpha;Neoteleostei;Eurypterygia;Ctenosquamata;Acanthomorphata;Euacanthomorphacea;Percomorphaceae;Pelagiaria;Scombriformes;Scombridae;Scombrinae;Thunnini;Auxis;Auxis thazard	√	√	√	√	√	√	√	√	×	√	√	×
	Avocettina infans	NC_013624.2	Vertebrata;Gnathostomata;Teleostomi;Euteleostomi;Actinopterygii;Actinopteri;Neopterygii;Teleostei;Elopocephalai;Elopocephala;Elopomorpha;Anguilliformes;Nemichthyidae;Avocettina;Avocettina infans	√	√	√	√	√	√	√	√	×	√	√	×
	Awaous banana	NC_036224.1	Vertebrata;Gnathostomata;Teleostomi;Euteleostomi;Actinopterygii;Actinopteri;Neopterygii;Teleostei;Osteoglossocephalai;Clupeocephala;Euteleosteomorpha;Neoteleostei;Eurypterygia;Ctenosquamata;Acanthomorphata;Euacanthomorphacea;Percomorphaceae;Gobiaria;Gobiiformes;Gobioidei;Gobiidae;Gobionellinae;Awaous;Awaous banana	√	√	√	√	√	√	√	√	×	√	√	×
	Bagarius bagarius	KJ204285.1	Vertebrata;Gnathostomata;Teleostomi;Euteleostomi;Actinopterygii;Actinopteri;Neopterygii;Teleostei;Osteoglossocephalai;Clupeocephala;Otomorpha;Ostariophysi;Otophysi;Characiphysae;Siluriformes;Siluroidei;Sisoridae;Sisorinae;Bagarius;Bagarius bagarius	√	√	√	√	√	√	√	√	√	√	√	×
	Bagarius yarrelli	KT983411.1	Vertebrata;Gnathostomata;Teleostomi;Euteleostomi;Actinopterygii;Actinopteri;Neopterygii;Teleostei;Osteoglossocephalai;Clupeocephala;Otomorpha;Ostariophysi;Otophysi;Characiphysae;Siluriformes;Siluroidei;Sisoridae;Sisorinae;Bagarius;Bagarius yarrelli	√	√	√	√	√	√	√	√	√	√	√	×
	Bagre panamensis	NC_037470.1	Vertebrata;Gnathostomata;Teleostomi;Euteleostomi;Actinopterygii;Actinopteri;Neopterygii;Teleostei;Osteoglossocephalai;Clupeocephala;Otomorpha;Ostariophysi;Otophysi;Characiphysae;Siluriformes;Siluroidei;Ariidae;Bagre;Bagre panamensis	√	√	√	√	√	√	√	√	√	√	√	×
	Bahaba taipingensis	NC_018347.1	Vertebrata;Gnathostomata;Teleostomi;Euteleostomi;Actinopterygii;Actinopteri;Neopterygii;Teleostei;Osteoglossocephalai;Clupeocephala;Euteleosteomorpha;Neoteleostei;Eurypterygia;Ctenosquamata;Acanthomorphata;Euacanthomorphacea;Percomorphaceae;Eupercaria;Eupercaria incertae sedis;Sciaenidae;Bahaba;Bahaba taipingensis	√	√	√	√	√	√	√	√	×	√	√	×
	Bajacalifornia megalops	NC_013577.1	Vertebrata;Gnathostomata;Teleostomi;Euteleostomi;Actinopterygii;Actinopteri;Neopterygii;Teleostei;Osteoglossocephalai;Clupeocephala;Otomorpha;Alepocephali;Alepocephaliformes;Alepocephalidae;Bajacalifornia;Bajacalifornia megalops	√	√	√	√	√	√	√	√	√	√	√	×
	Balistapus undulatus	NC_011946.1	Vertebrata;Gnathostomata;Teleostomi;Euteleostomi;Actinopterygii;Actinopteri;Neopterygii;Teleostei;Osteoglossocephalai;Clupeocephala;Euteleosteomorpha;Neoteleostei;Eurypterygia;Ctenosquamata;Acanthomorphata;Euacanthomorphacea;Percomorphaceae;Eupercaria;Tetraodontiformes;Balistoidea;Balistidae;Balistapus;Balistapus undulatus	√	√	√	√	√	√	√	√	×	√	×	×
	Balistes vetula	NC_011948.1	Vertebrata;Gnathostomata;Teleostomi;Euteleostomi;Actinopterygii;Actinopteri;Neopterygii;Teleostei;Osteoglossocephalai;Clupeocephala;Euteleosteomorpha;Neoteleostei;Eurypterygia;Ctenosquamata;Acanthomorphata;Euacanthomorphacea;Percomorphaceae;Eupercaria;Tetraodontiformes;Balistoidea;Balistidae;Balistes;Balistes vetula	√	√	√	√	√	√	√	√	×	√	√	×
	Balistoides conspicillum	NC_011934.1	Vertebrata;Gnathostomata;Teleostomi;Euteleostomi;Actinopterygii;Actinopteri;Neopterygii;Teleostei;Osteoglossocephalai;Clupeocephala;Euteleosteomorpha;Neoteleostei;Eurypterygia;Ctenosquamata;Acanthomorphata;Euacanthomorphacea;Percomorphaceae;Eupercaria;Tetraodontiformes;Balistoidea;Balistidae;Balistoides;Balistoides conspicillum	√	√	√	√	√	√	√	√	×	√	√	×
	Balitora ludongensis	NC_050979.1	Vertebrata;Gnathostomata;Teleostomi;Euteleostomi;Actinopterygii;Actinopteri;Neopterygii;Teleostei;Osteoglossocephalai;Clupeocephala;Otomorpha;Ostariophysi;Otophysi;Cypriniphysae;Cypriniformes;Cobitoidei;Balitoridae;Balitora;Balitora ludongensis	√	√	√	√	√	√	√	√	√	√	√	×
	Bangana decora	NC_026221.1	Vertebrata;Gnathostomata;Teleostomi;Euteleostomi;Actinopterygii;Actinopteri;Neopterygii;Teleostei;Osteoglossocephalai;Clupeocephala;Otomorpha;Ostariophysi;Otophysi;Cypriniphysae;Cypriniformes;Cyprinoidei;Cyprinidae;Labeoninae;Labeonini;Bangana;Bangana decora	√	√	√	√	√	√	√	√	√	√	√	×
	Bangana tungting	KF752481.1	Vertebrata;Gnathostomata;Teleostomi;Euteleostomi;Actinopterygii;Actinopteri;Neopterygii;Teleostei;Osteoglossocephalai;Clupeocephala;Otomorpha;Ostariophysi;Otophysi;Cypriniphysae;Cypriniformes;Cyprinoidei;Cyprinidae;Labeoninae;Labeonini;Bangana;Bangana tungting	√	√	√	√	√	√	√	√	√	√	√	×
	Banjos banjos	NC_028165.1	Vertebrata;Gnathostomata;Teleostomi;Euteleostomi;Actinopterygii;Actinopteri;Neopterygii;Teleostei;Osteoglossocephalai;Clupeocephala;Euteleosteomorpha;Neoteleostei;Eurypterygia;Ctenosquamata;Acanthomorphata;Euacanthomorphacea;Percomorphaceae;Eupercaria;Pempheriformes;Banjosidae;Banjos;Banjos banjos	√	√	√	√	√	√	√	√	×	√	√	×
	Barbatula barbatula	NC_027192.1	Vertebrata;Gnathostomata;Teleostomi;Euteleostomi;Actinopterygii;Actinopteri;Neopterygii;Teleostei;Osteoglossocephalai;Clupeocephala;Otomorpha;Ostariophysi;Otophysi;Cypriniphysae;Cypriniformes;Cobitoidei;Nemacheilidae;Barbatula;Barbatula barbatula	√	√	√	√	√	√	√	√	√	√	√	×
	Barbatula minxianensis	KT213596.1	Vertebrata;Gnathostomata;Teleostomi;Euteleostomi;Actinopterygii;Actinopteri;Neopterygii;Teleostei;Osteoglossocephalai;Clupeocephala;Otomorpha;Ostariophysi;Otophysi;Cypriniphysae;Cypriniformes;Cobitoidei;Nemacheilidae;Barbatula;Barbatula minxianensis	√	√	√	√	√	√	√	√	√	√	√	×
	Barbatula nuda	NC_022858.1	Vertebrata;Gnathostomata;Teleostomi;Euteleostomi;Actinopterygii;Actinopteri;Neopterygii;Teleostei;Osteoglossocephalai;Clupeocephala;Otomorpha;Ostariophysi;Otophysi;Cypriniphysae;Cypriniformes;Cobitoidei;Nemacheilidae;Barbatula;Barbatula nuda	√	√	√	√	√	√	√	√	√	√	√	×
	Barbatula sp. YW-2106	KT259193.1	Vertebrata;Gnathostomata;Teleostomi;Euteleostomi;Actinopterygii;Actinopteri;Neopterygii;Teleostei;Osteoglossocephalai;Clupeocephala;Otomorpha;Ostariophysi;Otophysi;Cypriniphysae;Cypriniformes;Cobitoidei;Nemacheilidae;Barbatula;unclassified Barbatula;Barbatula sp. YW-2106	√	√	√	√	√	√	√	√	√	√	√	×
	Barbatula toni	MK900633.1	Vertebrata;Gnathostomata;Teleostomi;Euteleostomi;Actinopterygii;Actinopteri;Neopterygii;Teleostei;Osteoglossocephalai;Clupeocephala;Otomorpha;Ostariophysi;Otophysi;Cypriniphysae;Cypriniformes;Cobitoidei;Nemacheilidae;Barbatula;Barbatula toni	√	√	√	√	√	√	√	√	√	√	×	×
	Barbodes binotatus	NC_034755.1	Vertebrata;Gnathostomata;Teleostomi;Euteleostomi;Actinopterygii;Actinopteri;Neopterygii;Teleostei;Osteoglossocephalai;Clupeocephala;Otomorpha;Ostariophysi;Otophysi;Cypriniphysae;Cypriniformes;Cyprinoidei;Cyprinidae;Smiliogastrinae;Barbodes;Barbodes binotatus	√	√	√	√	√	√	√	√	√	√	√	×
	Barbonymus gonionotus	NC_008655.1	Vertebrata;Gnathostomata;Teleostomi;Euteleostomi;Actinopterygii;Actinopteri;Neopterygii;Teleostei;Osteoglossocephalai;Clupeocephala;Otomorpha;Ostariophysi;Otophysi;Cypriniphysae;Cypriniformes;Cyprinoidei;Cyprinidae;'Poropuntiinae';Barbonymus;Barbonymus gonionotus	√	√	√	√	√	√	√	√	√	√	√	×
	Barbonymus schwanefeldii	KU498040.2	Vertebrata;Gnathostomata;Teleostomi;Euteleostomi;Actinopterygii;Actinopteri;Neopterygii;Teleostei;Osteoglossocephalai;Clupeocephala;Otomorpha;Ostariophysi;Otophysi;Cypriniphysae;Cypriniformes;Cyprinoidei;Cyprinidae;'Poropuntiinae';Barbonymus;Barbonymus schwanefeldii	√	√	√	√	√	√	√	√	√	√	√	×
	Barbourisia rufa	NC_012046.1	Vertebrata;Gnathostomata;Teleostomi;Euteleostomi;Actinopterygii;Actinopteri;Neopterygii;Teleostei;Osteoglossocephalai;Clupeocephala;Euteleosteomorpha;Neoteleostei;Eurypterygia;Ctenosquamata;Acanthomorphata;Euacanthomorphacea;Berycimorphaceae;Beryciformes;Barbourisiidae;Barbourisia;Barbourisia rufa	√	√	√	√	√	√	√	√	×	√	√	×
	Barbucca diabolica	NC_033954.1	Vertebrata;Gnathostomata;Teleostomi;Euteleostomi;Actinopterygii;Actinopteri;Neopterygii;Teleostei;Osteoglossocephalai;Clupeocephala;Otomorpha;Ostariophysi;Otophysi;Cypriniphysae;Cypriniformes;Cobitoidei;Barbuccidae;Barbucca;Barbucca diabolica	√	√	√	√	√	√	√	√	√	√	√	×
	Barbus barbus	NC_008654.1	Vertebrata;Gnathostomata;Teleostomi;Euteleostomi;Actinopterygii;Actinopteri;Neopterygii;Teleostei;Osteoglossocephalai;Clupeocephala;Otomorpha;Ostariophysi;Otophysi;Cypriniphysae;Cypriniformes;Cyprinoidei;Cyprinidae;Barbinae;Barbus;Barbus barbus	√	√	√	√	√	√	√	√	√	√	√	×
	Barilius bendelisis	NC_015533.1	Vertebrata;Gnathostomata;Teleostomi;Euteleostomi;Actinopterygii;Actinopteri;Neopterygii;Teleostei;Osteoglossocephalai;Clupeocephala;Otomorpha;Ostariophysi;Otophysi;Cypriniphysae;Cypriniformes;Cyprinoidei;Danionidae;Chedrinae;Barilius;Barilius bendelisis	√	√	√	√	√	√	√	√	×	√	×	×
	Barilius malabaricus	NC_046023.1	Vertebrata;Gnathostomata;Teleostomi;Euteleostomi;Actinopterygii;Actinopteri;Neopterygii;Teleostei;Osteoglossocephalai;Clupeocephala;Otomorpha;Ostariophysi;Otophysi;Cypriniphysae;Cypriniformes;Cyprinoidei;Danionidae;Chedrinae;Barilius;Barilius malabaricus	√	√	√	√	√	√	√	√	×	√	√	×
	Basilichthys microlepidotus	KM245937.1	Vertebrata;Gnathostomata;Teleostomi;Euteleostomi;Actinopterygii;Actinopteri;Neopterygii;Teleostei;Osteoglossocephalai;Clupeocephala;Euteleosteomorpha;Neoteleostei;Eurypterygia;Ctenosquamata;Acanthomorphata;Euacanthomorphacea;Percomorphaceae;Ovalentaria;Atherinomorphae;Atheriniformes;Atherinopsidae;Atherinopsinae;Basilichthys;Basilichthys microlepidotus	√	√	√	√	√	×	√	√	×	√	√	×
	Bassozetus zenkevitchi	NC_004374.1	Vertebrata;Gnathostomata;Teleostomi;Euteleostomi;Actinopterygii;Actinopteri;Neopterygii;Teleostei;Osteoglossocephalai;Clupeocephala;Euteleosteomorpha;Neoteleostei;Eurypterygia;Ctenosquamata;Acanthomorphata;Euacanthomorphacea;Percomorphaceae;Ophidiaria;Ophidiiformes;Ophidioidei;Ophidiidae;Neobythitinae;Bassozetus;Bassozetus zenkevitchi	√	√	√	√	√	√	√	√	×	√	√	×
	Bathyclupea megaceps	NC_034342.1	Vertebrata;Gnathostomata;Teleostomi;Euteleostomi;Actinopterygii;Actinopteri;Neopterygii;Teleostei;Osteoglossocephalai;Clupeocephala;Euteleosteomorpha;Neoteleostei;Eurypterygia;Ctenosquamata;Acanthomorphata;Euacanthomorphacea;Percomorphaceae;Eupercaria;Pempheriformes;Bathyclupeidae;Bathyclupea;Bathyclupea megaceps	×	√	√	√	√	√	√	√	×	√	√	×
	Bathygadus antrodes	NC_008222.1	Vertebrata;Gnathostomata;Teleostomi;Euteleostomi;Actinopterygii;Actinopteri;Neopterygii;Teleostei;Osteoglossocephalai;Clupeocephala;Euteleosteomorpha;Neoteleostei;Eurypterygia;Ctenosquamata;Acanthomorphata;Paracanthopterygii;Zeiogadaria;Gadariae;Gadiformes;Macrouroidei;Macrouridae;Bathygadinae;Bathygadus;Bathygadus antrodes	√	√	×	√	√	√	√	√	×	√	√	×
	Bathygobius coalitus	NC_037141.1	Vertebrata;Gnathostomata;Teleostomi;Euteleostomi;Actinopterygii;Actinopteri;Neopterygii;Teleostei;Osteoglossocephalai;Clupeocephala;Euteleosteomorpha;Neoteleostei;Eurypterygia;Ctenosquamata;Acanthomorphata;Euacanthomorphacea;Percomorphaceae;Gobiaria;Gobiiformes;Gobioidei;Gobiidae;Gobiinae;Bathygobius;Bathygobius coalitus	√	√	√	√	√	√	√	√	×	√	√	×
	Bathygobius cocosensis	MG704838.1	Vertebrata;Gnathostomata;Teleostomi;Euteleostomi;Actinopterygii;Actinopteri;Neopterygii;Teleostei;Osteoglossocephalai;Clupeocephala;Euteleosteomorpha;Neoteleostei;Eurypterygia;Ctenosquamata;Acanthomorphata;Euacanthomorphacea;Percomorphaceae;Gobiaria;Gobiiformes;Gobioidei;Gobiidae;Gobiinae;Bathygobius;Bathygobius cocosensis	√	√	√	√	√	√	√	√	×	√	√	×
	Bathyprion danae	NC_011015.1	Vertebrata;Gnathostomata;Teleostomi;Euteleostomi;Actinopterygii;Actinopteri;Neopterygii;Teleostei;Osteoglossocephalai;Clupeocephala;Otomorpha;Alepocephali;Alepocephaliformes;Alepocephalidae;Bathyprion;Bathyprion danae	√	√	√	√	√	√	√	√	√	√	√	×
	Bathytroctes breviceps	NC_013574.1	Vertebrata;Gnathostomata;Teleostomi;Euteleostomi;Actinopterygii;Actinopteri;Neopterygii;Teleostei;Osteoglossocephalai;Clupeocephala;Otomorpha;Alepocephali;Alepocephaliformes;Alepocephalidae;Bathytroctes;Bathytroctes breviceps	√	√	√	√	√	√	√	√	√	√	×	×
	Bathytroctes macrolepis	NC_013575.1	Vertebrata;Gnathostomata;Teleostomi;Euteleostomi;Actinopterygii;Actinopteri;Neopterygii;Teleostei;Osteoglossocephalai;Clupeocephala;Otomorpha;Alepocephali;Alepocephaliformes;Alepocephalidae;Bathytroctes;Bathytroctes macrolepis	√	√	√	√	√	√	√	√	√	√	√	×
	Bathytroctes michaelsarsi	NC_013579.1	Vertebrata;Gnathostomata;Teleostomi;Euteleostomi;Actinopterygii;Actinopteri;Neopterygii;Teleostei;Osteoglossocephalai;Clupeocephala;Otomorpha;Alepocephali;Alepocephaliformes;Alepocephalidae;Bathytroctes;Bathytroctes michaelsarsi	√	√	√	√	√	√	√	√	√	√	√	√
	Bathytroctes microlepis	NC_011017.1	Vertebrata;Gnathostomata;Teleostomi;Euteleostomi;Actinopterygii;Actinopteri;Neopterygii;Teleostei;Osteoglossocephalai;Clupeocephala;Otomorpha;Alepocephali;Alepocephaliformes;Alepocephalidae;Bathytroctes;Bathytroctes microlepis	√	√	√	√	√	√	√	√	√	√	√	×
	Batrachomoeus trispinosus	AP006738.1	Vertebrata;Gnathostomata;Teleostomi;Euteleostomi;Actinopterygii;Actinopteri;Neopterygii;Teleostei;Osteoglossocephalai;Clupeocephala;Euteleosteomorpha;Neoteleostei;Eurypterygia;Ctenosquamata;Acanthomorphata;Euacanthomorphacea;Percomorphaceae;Batrachoidaria;Batrachoidiformes;Batrachoididae;Halophryninae;Batrachomoeus;Batrachomoeus trispinosus	√	√	×	√	×	√	√	√	×	√	√	×
	Beaufortia kweichowensis	KY352767.1	Vertebrata;Gnathostomata;Teleostomi;Euteleostomi;Actinopterygii;Actinopteri;Neopterygii;Teleostei;Osteoglossocephalai;Clupeocephala;Otomorpha;Ostariophysi;Otophysi;Cypriniphysae;Cypriniformes;Cobitoidei;Gastromyzontidae;Beaufortia;Beaufortia kweichowensis	√	√	√	√	√	√	√	√	√	√	√	×
	Beaufortia szechuanensis	NC_027291.1	Vertebrata;Gnathostomata;Teleostomi;Euteleostomi;Actinopterygii;Actinopteri;Neopterygii;Teleostei;Osteoglossocephalai;Clupeocephala;Otomorpha;Ostariophysi;Otophysi;Cypriniphysae;Cypriniformes;Cobitoidei;Gastromyzontidae;Beaufortia;Beaufortia szechuanensis	√	√	√	√	√	√	√	√	√	√	√	×
	Bedotia geayi	NC_034336.1	Vertebrata;Gnathostomata;Teleostomi;Euteleostomi;Actinopterygii;Actinopteri;Neopterygii;Teleostei;Osteoglossocephalai;Clupeocephala;Euteleosteomorpha;Neoteleostei;Eurypterygia;Ctenosquamata;Acanthomorphata;Euacanthomorphacea;Percomorphaceae;Ovalentaria;Atherinomorphae;Atheriniformes;Bedotiidae;Bedotia;Bedotia geayi	√	√	√	√	√	√	√	√	×	√	√	×
	Belligobio nummifer	NC_023975.1	Vertebrata;Gnathostomata;Teleostomi;Euteleostomi;Actinopterygii;Actinopteri;Neopterygii;Teleostei;Osteoglossocephalai;Clupeocephala;Otomorpha;Ostariophysi;Otophysi;Cypriniphysae;Cypriniformes;Cyprinoidei;Gobionidae;Hemibarbus-Squalidus clade;Belligobio;Belligobio nummifer	√	√	√	√	√	√	√	√	√	√	√	×
	Bengana rendahli	NC_028169.1	Vertebrata;Gnathostomata;Teleostomi;Euteleostomi;Actinopterygii;Actinopteri;Neopterygii;Teleostei;Osteoglossocephalai;Clupeocephala;Otomorpha;Ostariophysi;Otophysi;Cypriniphysae;Cypriniformes;Cyprinoidei;Cyprinidae;Labeoninae;Labeonini;Bangana;Bengana rendahli	√	√	√	√	√	√	√	√	√	√	√	×
	Benthodesmus tenuis	NC_022504.1	Vertebrata;Gnathostomata;Teleostomi;Euteleostomi;Actinopterygii;Actinopteri;Neopterygii;Teleostei;Osteoglossocephalai;Clupeocephala;Euteleosteomorpha;Neoteleostei;Eurypterygia;Ctenosquamata;Acanthomorphata;Euacanthomorphacea;Percomorphaceae;Pelagiaria;Scombriformes;Trichiuridae;Aphanopodinae;Benthodesmus;Benthodesmus tenuis	√	√	√	√	√	×	√	√	×	√	√	×
	Benthosema pterotum	NC_047480.1	Vertebrata;Gnathostomata;Teleostomi;Euteleostomi;Actinopterygii;Actinopteri;Neopterygii;Teleostei;Osteoglossocephalai;Clupeocephala;Euteleosteomorpha;Neoteleostei;Eurypterygia;Ctenosquamata;Myctophata;Myctophiformes;Myctophidae;Benthosema;Benthosema pterotum	√	√	√	√	√	√	√	√	√	√	√	×
	Beryx decadactylus	NC_004393.1	Vertebrata;Gnathostomata;Teleostomi;Euteleostomi;Actinopterygii;Actinopteri;Neopterygii;Teleostei;Osteoglossocephalai;Clupeocephala;Euteleosteomorpha;Neoteleostei;Eurypterygia;Ctenosquamata;Acanthomorphata;Euacanthomorphacea;Berycimorphaceae;Beryciformes;Berycidae;Beryx;Beryx decadactylus	√	√	√	√	√	√	√	√	×	√	√	×
	Beryx mollis	DQ993168.1	Vertebrata;Gnathostomata;Teleostomi;Euteleostomi;Actinopterygii;Actinopteri;Neopterygii;Teleostei;Osteoglossocephalai;Clupeocephala;Euteleosteomorpha;Neoteleostei;Eurypterygia;Ctenosquamata;Acanthomorphata;Euacanthomorphacea;Berycimorphaceae;Beryciformes;Berycidae;Beryx;Beryx mollis	√	√	√	√	√	√	√	√	×	√	√	×
	Beryx splendens	DQ996312.1	Vertebrata;Gnathostomata;Teleostomi;Euteleostomi;Actinopterygii;Actinopteri;Neopterygii;Teleostei;Osteoglossocephalai;Clupeocephala;Euteleosteomorpha;Neoteleostei;Eurypterygia;Ctenosquamata;Acanthomorphata;Euacanthomorphacea;Berycimorphaceae;Beryciformes;Berycidae;Beryx;Beryx splendens	√	√	√	√	√	√	√	√	×	√	√	×
	Betadevario ramachandrani	MH817023.1	Vertebrata;Gnathostomata;Teleostomi;Euteleostomi;Actinopterygii;Actinopteri;Neopterygii;Teleostei;Osteoglossocephalai;Clupeocephala;Otomorpha;Ostariophysi;Otophysi;Cypriniphysae;Cypriniformes;Cyprinoidei;Danionidae;Danioninae;Betadevario;Betadevario ramachandrani	√	√	√	√	√	√	√	√	×	√	√	×
	Betta mahachaiensis	MT682637.1	Vertebrata;Gnathostomata;Teleostomi;Euteleostomi;Actinopterygii;Actinopteri;Neopterygii;Teleostei;Osteoglossocephalai;Clupeocephala;Euteleosteomorpha;Neoteleostei;Eurypterygia;Ctenosquamata;Acanthomorphata;Euacanthomorphacea;Percomorphaceae;Anabantaria;Anabantiformes;Anabantoidei;Osphronemidae;Macropodinae;Betta;Betta mahachaiensis	√	√	√	√	×	√	√	√	×	√	√	×
	Betta splendens	KR527219.1	Vertebrata;Gnathostomata;Teleostomi;Euteleostomi;Actinopterygii;Actinopteri;Neopterygii;Teleostei;Osteoglossocephalai;Clupeocephala;Euteleosteomorpha;Neoteleostei;Eurypterygia;Ctenosquamata;Acanthomorphata;Euacanthomorphacea;Percomorphaceae;Anabantaria;Anabantiformes;Anabantoidei;Osphronemidae;Macropodinae;Betta;Betta splendens	√	√	√	√	×	√	√	√	×	√	√	×
	Bhavania australis	NC_029440.1	Vertebrata;Gnathostomata;Teleostomi;Euteleostomi;Actinopterygii;Actinopteri;Neopterygii;Teleostei;Osteoglossocephalai;Clupeocephala;Otomorpha;Ostariophysi;Otophysi;Cypriniphysae;Cypriniformes;Cobitoidei;Balitoridae;Bhavania;Bhavania australis	√	√	√	√	√	√	√	√	√	√	√	×
	Biwia springeri	NC_022188.1	Vertebrata;Gnathostomata;Teleostomi;Euteleostomi;Actinopterygii;Actinopteri;Neopterygii;Teleostei;Osteoglossocephalai;Clupeocephala;Otomorpha;Ostariophysi;Otophysi;Cypriniphysae;Cypriniformes;Cyprinoidei;Gobionidae;Gobioninae;Biwia;Biwia springeri	√	√	√	√	√	√	√	√	√	√	√	×
	Biwia zezera	NC_008324.1	Vertebrata;Gnathostomata;Teleostomi;Euteleostomi;Actinopterygii;Actinopteri;Neopterygii;Teleostei;Osteoglossocephalai;Clupeocephala;Otomorpha;Ostariophysi;Otophysi;Cypriniphysae;Cypriniformes;Cyprinoidei;Gobionidae;Gobioninae;Biwia;Biwia zezera	√	√	√	√	√	√	√	√	√	√	√	×
	Blicca bjoerkna	MT410960.1	Vertebrata;Gnathostomata;Teleostomi;Euteleostomi;Actinopterygii;Actinopteri;Neopterygii;Teleostei;Osteoglossocephalai;Clupeocephala;Otomorpha;Ostariophysi;Otophysi;Cypriniphysae;Cypriniformes;Cyprinoidei;Leuciscidae;Leuciscinae;Blicca;Blicca bjoerkna	√	√	√	√	√	√	√	√	√	√	√	×
	Bodianus oxycephalus	NC_028423.1	Vertebrata;Gnathostomata;Teleostomi;Euteleostomi;Actinopterygii;Actinopteri;Neopterygii;Teleostei;Osteoglossocephalai;Clupeocephala;Euteleosteomorpha;Neoteleostei;Eurypterygia;Ctenosquamata;Acanthomorphata;Euacanthomorphacea;Percomorphaceae;Eupercaria;Labriformes;Labridae;Bodianus;Bodianus oxycephalus	√	√	√	√	√	√	√	√	×	√	√	×
	Bolbometopon muricatum	NC_033901.1	Vertebrata;Gnathostomata;Teleostomi;Euteleostomi;Actinopterygii;Actinopteri;Neopterygii;Teleostei;Osteoglossocephalai;Clupeocephala;Euteleosteomorpha;Neoteleostei;Eurypterygia;Ctenosquamata;Acanthomorphata;Euacanthomorphacea;Percomorphaceae;Eupercaria;Labriformes;Labridae;Bolbometopon;Bolbometopon muricatum	√	√	√	√	×	√	√	√	×	√	√	×
	Boleophthalmus boddarti	NC_023468.1	Vertebrata;Gnathostomata;Teleostomi;Euteleostomi;Actinopterygii;Actinopteri;Neopterygii;Teleostei;Osteoglossocephalai;Clupeocephala;Euteleosteomorpha;Neoteleostei;Eurypterygia;Ctenosquamata;Acanthomorphata;Euacanthomorphacea;Percomorphaceae;Gobiaria;Gobiiformes;Gobioidei;Gobiidae;Oxudercinae;Boleophthalmus;Boleophthalmus boddarti	√	√	√	√	√	√	√	√	×	√	√	×
	Boleophthalmus pectinirostris	NC_016195.1	Vertebrata;Gnathostomata;Teleostomi;Euteleostomi;Actinopterygii;Actinopteri;Neopterygii;Teleostei;Osteoglossocephalai;Clupeocephala;Euteleosteomorpha;Neoteleostei;Eurypterygia;Ctenosquamata;Acanthomorphata;Euacanthomorphacea;Percomorphaceae;Gobiaria;Gobiiformes;Gobioidei;Gobiidae;Oxudercinae;Boleophthalmus;Boleophthalmus pectinirostris	√	√	√	√	√	√	√	√	×	√	√	×
	Boraras maculatus	AP011420.1	Vertebrata;Gnathostomata;Teleostomi;Euteleostomi;Actinopterygii;Actinopteri;Neopterygii;Teleostei;Osteoglossocephalai;Clupeocephala;Otomorpha;Ostariophysi;Otophysi;Cypriniphysae;Cypriniformes;Cyprinoidei;Danionidae;Rasborinae;Boraras;Boraras maculatus	√	√	√	√	√	√	√	√	√	√	√	×
	Boreogadus saida	MH035562.1	Vertebrata;Gnathostomata;Teleostomi;Euteleostomi;Actinopterygii;Actinopteri;Neopterygii;Teleostei;Osteoglossocephalai;Clupeocephala;Euteleosteomorpha;Neoteleostei;Eurypterygia;Ctenosquamata;Acanthomorphata;Paracanthopterygii;Zeiogadaria;Gadariae;Gadiformes;Gadoidei;Gadidae;Boreogadus;Boreogadus saida	√	√	×	√	√	√	√	√	×	√	√	×
	Bostrychus sinensis	NC_017880.1	Vertebrata;Gnathostomata;Teleostomi;Euteleostomi;Actinopterygii;Actinopteri;Neopterygii;Teleostei;Osteoglossocephalai;Clupeocephala;Euteleosteomorpha;Neoteleostei;Eurypterygia;Ctenosquamata;Acanthomorphata;Euacanthomorphacea;Percomorphaceae;Gobiaria;Gobiiformes;Eleotroidei;Eleotridae;Butinae;Bostrychus;Bostrychus sinensis	√	√	√	√	√	√	√	√	×	√	×	×
	Bothrocara hollandi	NC_043859.1	Vertebrata;Gnathostomata;Teleostomi;Euteleostomi;Actinopterygii;Actinopteri;Neopterygii;Teleostei;Osteoglossocephalai;Clupeocephala;Euteleosteomorpha;Neoteleostei;Eurypterygia;Ctenosquamata;Acanthomorphata;Euacanthomorphacea;Percomorphaceae;Eupercaria;Perciformes;Cottioidei;Zoarcales;Zoarcidae;Lycodinae;Bothrocara;Bothrocara hollandi	√	√	√	√	√	√	√	√	×	√	√	×
	Bothus myriaster	NC_030365.1	Vertebrata;Gnathostomata;Teleostomi;Euteleostomi;Actinopterygii;Actinopteri;Neopterygii;Teleostei;Osteoglossocephalai;Clupeocephala;Euteleosteomorpha;Neoteleostei;Eurypterygia;Ctenosquamata;Acanthomorphata;Euacanthomorphacea;Percomorphaceae;Carangaria;Pleuronectiformes;Pleuronectoidei;Bothidae;Bothus;Bothus myriaster	√	√	√	√	√	√	√	√	×	√	√	×
	Botia lohachata	NC_027495.1	Vertebrata;Gnathostomata;Teleostomi;Euteleostomi;Actinopterygii;Actinopteri;Neopterygii;Teleostei;Osteoglossocephalai;Clupeocephala;Otomorpha;Ostariophysi;Otophysi;Cypriniphysae;Cypriniformes;Cobitoidei;Botiidae;Botia;Botia lohachata	√	√	√	√	√	√	√	√	√	√	√	×
	Boulengerella maculata	AB070207.1	Vertebrata;Gnathostomata;Teleostomi;Euteleostomi;Actinopterygii;Actinopteri;Neopterygii;Teleostei;Osteoglossocephalai;Clupeocephala;Otomorpha;Ostariophysi;Otophysi;Characiphysae;Characiformes;Characoidei;Ctenoluciidae;Boulengerella;Boulengerella maculata	√	√	√	√	√	√	√	√	√	√	√	×
	Bovichtus argentinus	NC_034351.1	Vertebrata;Gnathostomata;Teleostomi;Euteleostomi;Actinopterygii;Actinopteri;Neopterygii;Teleostei;Osteoglossocephalai;Clupeocephala;Euteleosteomorpha;Neoteleostei;Eurypterygia;Ctenosquamata;Acanthomorphata;Euacanthomorphacea;Percomorphaceae;Eupercaria;Perciformes;Notothenioidei;Bovichtidae;Bovichtus;Bovichtus argentinus	√	√	×	√	√	√	√	√	×	√	√	×
	Brachaluteres ulvarum	NC_011940.1	Vertebrata;Gnathostomata;Teleostomi;Euteleostomi;Actinopterygii;Actinopteri;Neopterygii;Teleostei;Osteoglossocephalai;Clupeocephala;Euteleosteomorpha;Neoteleostei;Eurypterygia;Ctenosquamata;Acanthomorphata;Euacanthomorphacea;Percomorphaceae;Eupercaria;Tetraodontiformes;Balistoidea;Monacanthidae;Brachaluteres;Brachaluteres ulvarum	√	√	√	√	√	√	√	√	×	√	√	×
	Brachirus orientalis	KJ433558.1	Vertebrata;Gnathostomata;Teleostomi;Euteleostomi;Actinopterygii;Actinopteri;Neopterygii;Teleostei;Osteoglossocephalai;Clupeocephala;Euteleosteomorpha;Neoteleostei;Eurypterygia;Ctenosquamata;Acanthomorphata;Euacanthomorphacea;Percomorphaceae;Carangaria;Pleuronectiformes;Pleuronectoidei;Soleidae;Brachirus;Brachirus orientalis	√	√	√	√	×	√	√	√	×	√	√	×
	Brachygobius doriae	NC_037142.1	Vertebrata;Gnathostomata;Teleostomi;Euteleostomi;Actinopterygii;Actinopteri;Neopterygii;Teleostei;Osteoglossocephalai;Clupeocephala;Euteleosteomorpha;Neoteleostei;Eurypterygia;Ctenosquamata;Acanthomorphata;Euacanthomorphacea;Percomorphaceae;Gobiaria;Gobiiformes;Gobioidei;Gobiidae;Gobionellinae;Brachygobius;Brachygobius doriae	√	√	√	√	√	√	√	√	√	√	√	×
	Brachygobius kabiliensis	KT153060.1	Vertebrata;Gnathostomata;Teleostomi;Euteleostomi;Actinopterygii;Actinopteri;Neopterygii;Teleostei;Osteoglossocephalai;Clupeocephala;Euteleosteomorpha;Neoteleostei;Eurypterygia;Ctenosquamata;Acanthomorphata;Euacanthomorphacea;Percomorphaceae;Gobiaria;Gobiiformes;Gobioidei;Gobiidae;Gobionellinae;Brachygobius;Brachygobius kabiliensis	√	√	√	√	√	√	√	√	×	√	√	×
	Brachyhypopomus occidentalis	MH399591.1	Vertebrata;Gnathostomata;Teleostomi;Euteleostomi;Actinopterygii;Actinopteri;Neopterygii;Teleostei;Osteoglossocephalai;Clupeocephala;Otomorpha;Ostariophysi;Otophysi;Characiphysae;Gymnotiformes;Sternopygoidei;Hypopomidae;Brachyhypopomus;Brachyhypopomus occidentalis	√	√	√	√	√	√	√	√	√	√	√	×
	Brachyhypopomus sp. n. VERD	KX058570.1	Vertebrata;Gnathostomata;Teleostomi;Euteleostomi;Actinopterygii;Actinopteri;Neopterygii;Teleostei;Osteoglossocephalai;Clupeocephala;Otomorpha;Ostariophysi;Otophysi;Characiphysae;Gymnotiformes;Sternopygoidei;Hypopomidae;Brachyhypopomus;unclassified Brachyhypopomus;Brachyhypopomus sp. n. VERD	√	√	√	√	√	√	√	√	√	√	√	×
	Brachymystax lenok	NC_018341.1	Vertebrata;Gnathostomata;Teleostomi;Euteleostomi;Actinopterygii;Actinopteri;Neopterygii;Teleostei;Osteoglossocephalai;Clupeocephala;Euteleosteomorpha;Protacanthopterygii;Salmoniformes;Salmonidae;Salmoninae;Brachymystax;Brachymystax lenok	√	√	√	√	√	√	√	√	×	√	√	×
	Brachymystax lenok tsinlingensis	NC_018342.1	Vertebrata;Gnathostomata;Teleostomi;Euteleostomi;Actinopterygii;Actinopteri;Neopterygii;Teleostei;Osteoglossocephalai;Clupeocephala;Euteleosteomorpha;Protacanthopterygii;Salmoniformes;Salmonidae;Salmoninae;Brachymystax;Brachymystax lenok;Brachymystax lenok tsinlingensis	√	√	√	√	√	√	√	√	×	√	√	×
	Brachymystax tumensis	NC_024674.1	Vertebrata;Gnathostomata;Teleostomi;Euteleostomi;Actinopterygii;Actinopteri;Neopterygii;Teleostei;Osteoglossocephalai;Clupeocephala;Euteleosteomorpha;Protacanthopterygii;Salmoniformes;Salmonidae;Salmoninae;Brachymystax;Brachymystax tumensis	√	√	√	√	√	√	√	√	×	√	√	×
	Brachysomophis crocodilinus	KY081398.1	Vertebrata;Gnathostomata;Teleostomi;Euteleostomi;Actinopterygii;Actinopteri;Neopterygii;Teleostei;Elopocephalai;Elopocephala;Elopomorpha;Anguilliformes;Ophichthidae;Ophichthinae;Brachysomophis;Brachysomophis crocodilinus	√	√	√	√	√	√	√	√	×	√	√	×
	Brama dussumieri	MH409959.1	Vertebrata;Gnathostomata;Teleostomi;Euteleostomi;Actinopterygii;Actinopteri;Neopterygii;Teleostei;Osteoglossocephalai;Clupeocephala;Euteleosteomorpha;Neoteleostei;Eurypterygia;Ctenosquamata;Acanthomorphata;Euacanthomorphacea;Percomorphaceae;Pelagiaria;Scombriformes;Bramidae;Brama;Brama dussumieri	√	√	√	√	√	√	√	√	×	√	√	×
	Brama japonica	KT908039.1	Vertebrata;Gnathostomata;Teleostomi;Euteleostomi;Actinopterygii;Actinopteri;Neopterygii;Teleostei;Osteoglossocephalai;Clupeocephala;Euteleosteomorpha;Neoteleostei;Eurypterygia;Ctenosquamata;Acanthomorphata;Euacanthomorphacea;Percomorphaceae;Pelagiaria;Scombriformes;Bramidae;Brama;Brama japonica	√	√	√	√	√	√	√	√	×	√	×	×
	Branchiostegus albus	EU861053.1	Vertebrata;Gnathostomata;Teleostomi;Euteleostomi;Actinopterygii;Actinopteri;Neopterygii;Teleostei;Osteoglossocephalai;Clupeocephala;Euteleosteomorpha;Neoteleostei;Eurypterygia;Ctenosquamata;Acanthomorphata;Euacanthomorphacea;Percomorphaceae;Eupercaria;Eupercaria incertae sedis;Malacanthidae;Latilinae;Branchiostegus;Branchiostegus albus	√	√	√	√	√	√	√	√	×	√	√	×
	Branchiostegus argentatus	EU861054.1	Vertebrata;Gnathostomata;Teleostomi;Euteleostomi;Actinopterygii;Actinopteri;Neopterygii;Teleostei;Osteoglossocephalai;Clupeocephala;Euteleosteomorpha;Neoteleostei;Eurypterygia;Ctenosquamata;Acanthomorphata;Euacanthomorphacea;Percomorphaceae;Eupercaria;Eupercaria incertae sedis;Malacanthidae;Latilinae;Branchiostegus;Branchiostegus argentatus	√	√	√	√	√	√	√	√	×	√	√	×
	Branchiostegus japonicus	EU861052.1	Vertebrata;Gnathostomata;Teleostomi;Euteleostomi;Actinopterygii;Actinopteri;Neopterygii;Teleostei;Osteoglossocephalai;Clupeocephala;Euteleosteomorpha;Neoteleostei;Eurypterygia;Ctenosquamata;Acanthomorphata;Euacanthomorphacea;Percomorphaceae;Eupercaria;Eupercaria incertae sedis;Malacanthidae;Latilinae;Branchiostegus;Branchiostegus japonicus	√	√	√	√	√	√	√	√	×	√	√	×
	Bregmaceros nectabanus	NC_008124.1	Vertebrata;Gnathostomata;Teleostomi;Euteleostomi;Actinopterygii;Actinopteri;Neopterygii;Teleostei;Osteoglossocephalai;Clupeocephala;Euteleosteomorpha;Neoteleostei;Eurypterygia;Ctenosquamata;Acanthomorphata;Paracanthopterygii;Zeiogadaria;Gadariae;Gadiformes;Gadoidei;Bregmacerotidae;Bregmaceros;Bregmaceros nectabanus	√	×	×	×	×	√	√	√	×	√	√	×
	Brevimyrus niger	NC_012705.1	Vertebrata;Gnathostomata;Teleostomi;Euteleostomi;Actinopterygii;Actinopteri;Neopterygii;Teleostei;Osteoglossocephalai;Osteoglossocephala;Osteoglossomorpha;Osteoglossiformes;Mormyridae;Brevimyrus;Brevimyrus niger	√	√	√	√	√	√	√	√	√	√	√	×
	Brevoortia tyrannus	NC_014266.1	Vertebrata;Gnathostomata;Teleostomi;Euteleostomi;Actinopterygii;Actinopteri;Neopterygii;Teleostei;Osteoglossocephalai;Clupeocephala;Otomorpha;Clupei;Clupeiformes;Clupeoidei;Clupeidae;Alosinae;Brevoortia;Brevoortia tyrannus	√	√	√	√	√	√	√	√	×	√	×	×
	Brochis multiradiatus	MN641874.1	Vertebrata;Gnathostomata;Teleostomi;Euteleostomi;Actinopterygii;Actinopteri;Neopterygii;Teleostei;Osteoglossocephalai;Clupeocephala;Otomorpha;Ostariophysi;Otophysi;Characiphysae;Siluriformes;Loricarioidei;Callichthyidae;Brochis;Brochis multiradiatus	√	√	√	√	√	√	√	√	√	√	√	×
	Brycon henni	NC_026873.1	Vertebrata;Gnathostomata;Teleostomi;Euteleostomi;Actinopterygii;Actinopteri;Neopterygii;Teleostei;Osteoglossocephalai;Clupeocephala;Otomorpha;Ostariophysi;Otophysi;Characiphysae;Characiformes;Characoidei;Bryconidae;Bryconinae;Brycon;Brycon henni	√	√	√	√	√	√	√	√	√	√	√	×
	Brycon nattereri	MT428074.1	Vertebrata;Gnathostomata;Teleostomi;Euteleostomi;Actinopterygii;Actinopteri;Neopterygii;Teleostei;Osteoglossocephalai;Clupeocephala;Otomorpha;Ostariophysi;Otophysi;Characiphysae;Characiformes;Characoidei;Bryconidae;Bryconinae;Brycon;Brycon nattereri	√	√	√	√	√	√	√	√	√	√	√	×
	Brycon orbignyanus	KY825192.1	Vertebrata;Gnathostomata;Teleostomi;Euteleostomi;Actinopterygii;Actinopteri;Neopterygii;Teleostei;Osteoglossocephalai;Clupeocephala;Otomorpha;Ostariophysi;Otophysi;Characiphysae;Characiformes;Characoidei;Bryconidae;Bryconinae;Brycon;Brycon orbignyanus	√	√	√	√	√	√	√	√	√	√	√	×
	Buccochromis nototaenia	NC_031416.1	Vertebrata;Gnathostomata;Teleostomi;Euteleostomi;Actinopterygii;Actinopteri;Neopterygii;Teleostei;Osteoglossocephalai;Clupeocephala;Euteleosteomorpha;Neoteleostei;Eurypterygia;Ctenosquamata;Acanthomorphata;Euacanthomorphacea;Percomorphaceae;Ovalentaria;Cichlomorphae;Cichliformes;Cichlidae;African cichlids;Pseudocrenilabrinae;Haplochromini;Buccochromis;Buccochromis nototaenia	√	√	√	√	√	√	√	√	×	√	√	×
	Bufoceratias thele	NC_013869.1	Vertebrata;Gnathostomata;Teleostomi;Euteleostomi;Actinopterygii;Actinopteri;Neopterygii;Teleostei;Osteoglossocephalai;Clupeocephala;Euteleosteomorpha;Neoteleostei;Eurypterygia;Ctenosquamata;Acanthomorphata;Euacanthomorphacea;Percomorphaceae;Eupercaria;Lophiiformes;Ceratioidei;Diceratiidae;Bufoceratias;Bufoceratias thele	√	√	√	√	√	√	√	√	×	√	×	×
	Bujurquina mariae	NC_033543.1	Vertebrata;Gnathostomata;Teleostomi;Euteleostomi;Actinopterygii;Actinopteri;Neopterygii;Teleostei;Osteoglossocephalai;Clupeocephala;Euteleosteomorpha;Neoteleostei;Eurypterygia;Ctenosquamata;Acanthomorphata;Euacanthomorphacea;Percomorphaceae;Ovalentaria;Cichlomorphae;Cichliformes;Cichlidae;New World cichlids;Cichlasomatinae;Cichlasomatini;Bujurquina;Bujurquina mariae	√	√	√	√	√	√	√	√	×	√	√	×
	Bunocephalus coracoideus	NC_015811.1	Vertebrata;Gnathostomata;Teleostomi;Euteleostomi;Actinopterygii;Actinopteri;Neopterygii;Teleostei;Osteoglossocephalai;Clupeocephala;Otomorpha;Ostariophysi;Otophysi;Characiphysae;Siluriformes;Siluroidei;Aspredinidae;Bunocephalus;Bunocephalus coracoideus	√	√	√	√	√	√	√	√	√	√	×	×
	Cabdio morar	AP011335.1	Vertebrata;Gnathostomata;Teleostomi;Euteleostomi;Actinopterygii;Actinopteri;Neopterygii;Teleostei;Osteoglossocephalai;Clupeocephala;Otomorpha;Ostariophysi;Otophysi;Cypriniphysae;Cypriniformes;Cyprinoidei;Danionidae;Chedrinae;Cabdio;Cabdio morar	√	√	√	√	√	√	√	√	×	√	√	×
	Caecobarbus geertsii	NC_050271.1	Vertebrata;Gnathostomata;Teleostomi;Euteleostomi;Actinopterygii;Actinopteri;Neopterygii;Teleostei;Osteoglossocephalai;Clupeocephala;Otomorpha;Ostariophysi;Otophysi;Cypriniphysae;Cypriniformes;Cyprinoidei;Cyprinidae;Cyprinidae incertae sedis;Caecobarbus;Caecobarbus geertsii	√	√	√	√	√	√	√	√	√	√	√	×
	Caesio cuning	NC_029195.1	Vertebrata;Gnathostomata;Teleostomi;Euteleostomi;Actinopterygii;Actinopteri;Neopterygii;Teleostei;Osteoglossocephalai;Clupeocephala;Euteleosteomorpha;Neoteleostei;Eurypterygia;Ctenosquamata;Acanthomorphata;Euacanthomorphacea;Percomorphaceae;Eupercaria;Lutjaniformes;Lutjanidae;Caesioninae;Caesio;Caesio cuning	√	√	√	√	√	√	√	√	×	√	√	×
	Callanthias japonicus	NC_034343.1	Vertebrata;Gnathostomata;Teleostomi;Euteleostomi;Actinopterygii;Actinopteri;Neopterygii;Teleostei;Osteoglossocephalai;Clupeocephala;Euteleosteomorpha;Neoteleostei;Eurypterygia;Ctenosquamata;Acanthomorphata;Euacanthomorphacea;Percomorphaceae;Eupercaria;Eupercaria incertae sedis;Callanthiidae;Callanthias;Callanthias japonicus	√	√	√	√	√	√	√	√	×	√	√	×
	Callionymus enneactis	NC_024194.1	Vertebrata;Gnathostomata;Teleostomi;Euteleostomi;Actinopterygii;Actinopteri;Neopterygii;Teleostei;Osteoglossocephalai;Clupeocephala;Euteleosteomorpha;Neoteleostei;Eurypterygia;Ctenosquamata;Acanthomorphata;Euacanthomorphacea;Percomorphaceae;Syngnathiaria;Syngnathiformes;Callionymoidei;Callionymidae;Callionymus;Paradiplogrammus;Callionymus enneactis	√	√	√	√	√	√	√	√	×	√	√	×
	Callionymus olidus	NC_046750.1	Vertebrata;Gnathostomata;Teleostomi;Euteleostomi;Actinopterygii;Actinopteri;Neopterygii;Teleostei;Osteoglossocephalai;Clupeocephala;Euteleosteomorpha;Neoteleostei;Eurypterygia;Ctenosquamata;Acanthomorphata;Euacanthomorphacea;Percomorphaceae;Syngnathiaria;Syngnathiformes;Callionymoidei;Callionymidae;Callionymus;Callionymus incertae sedis;Callionymus olidus	√	√	√	√	√	√	√	√	×	√	√	×
	Callopanchax monroviae	MK784229.1	Vertebrata;Gnathostomata;Teleostomi;Euteleostomi;Actinopterygii;Actinopteri;Neopterygii;Teleostei;Osteoglossocephalai;Clupeocephala;Euteleosteomorpha;Neoteleostei;Eurypterygia;Ctenosquamata;Acanthomorphata;Euacanthomorphacea;Percomorphaceae;Ovalentaria;Atherinomorphae;Cyprinodontiformes;Aplocheiloidei;Nothobranchiidae;Callopanchax;Callopanchax monroviae	√	√	√	√	√	√	√	√	√	√	√	×
	Callopanchax sidibeorum	MK784239.1	Vertebrata;Gnathostomata;Teleostomi;Euteleostomi;Actinopterygii;Actinopteri;Neopterygii;Teleostei;Osteoglossocephalai;Clupeocephala;Euteleosteomorpha;Neoteleostei;Eurypterygia;Ctenosquamata;Acanthomorphata;Euacanthomorphacea;Percomorphaceae;Ovalentaria;Atherinomorphae;Cyprinodontiformes;Aplocheiloidei;Nothobranchiidae;Callopanchax;Callopanchax sidibeorum	√	√	√	√	√	√	√	√	√	√	√	×
	Callopanchax toddi	MK784214.1	Vertebrata;Gnathostomata;Teleostomi;Euteleostomi;Actinopterygii;Actinopteri;Neopterygii;Teleostei;Osteoglossocephalai;Clupeocephala;Euteleosteomorpha;Neoteleostei;Eurypterygia;Ctenosquamata;Acanthomorphata;Euacanthomorphacea;Percomorphaceae;Ovalentaria;Atherinomorphae;Cyprinodontiformes;Aplocheiloidei;Nothobranchiidae;Callopanchax;Callopanchax toddi	√	√	√	√	√	√	√	√	√	√	×	×
	Calotomus japonicus	NC_035427.1	Vertebrata;Gnathostomata;Teleostomi;Euteleostomi;Actinopterygii;Actinopteri;Neopterygii;Teleostei;Osteoglossocephalai;Clupeocephala;Euteleosteomorpha;Neoteleostei;Eurypterygia;Ctenosquamata;Acanthomorphata;Euacanthomorphacea;Percomorphaceae;Eupercaria;Labriformes;Labridae;Calotomus;Calotomus japonicus	√	√	√	√	√	√	√	√	×	√	√	×
	Campostoma anomalum	DQ536421.1	Vertebrata;Gnathostomata;Teleostomi;Euteleostomi;Actinopterygii;Actinopteri;Neopterygii;Teleostei;Osteoglossocephalai;Clupeocephala;Otomorpha;Ostariophysi;Otophysi;Cypriniphysae;Cypriniformes;Cyprinoidei;Leuciscidae;Pogonichthyinae;Campostoma;Campostoma anomalum	√	√	√	√	√	√	√	√	√	√	√	×
	Campylomormyrus compressirostris	NC_022960.1	Vertebrata;Gnathostomata;Teleostomi;Euteleostomi;Actinopterygii;Actinopteri;Neopterygii;Teleostei;Osteoglossocephalai;Osteoglossocephala;Osteoglossomorpha;Osteoglossiformes;Mormyridae;Campylomormyrus;Campylomormyrus compressirostris	√	√	√	√	√	×	√	√	√	√	×	×
	Candidia barbata	NC_037156.1	Vertebrata;Gnathostomata;Teleostomi;Euteleostomi;Actinopterygii;Actinopteri;Neopterygii;Teleostei;Osteoglossocephalai;Clupeocephala;Otomorpha;Ostariophysi;Otophysi;Cypriniphysae;Cypriniformes;Cyprinoidei;Xenocyprididae;Opsariichthyinae;Candidia;Candidia barbata	√	√	√	√	√	√	√	√	√	√	√	×
	Candidia pingtungensis	NC_028596.1	Vertebrata;Gnathostomata;Teleostomi;Euteleostomi;Actinopterygii;Actinopteri;Neopterygii;Teleostei;Osteoglossocephalai;Clupeocephala;Otomorpha;Ostariophysi;Otophysi;Cypriniphysae;Cypriniformes;Cyprinoidei;Xenocyprididae;Opsariichthyinae;Candidia;Candidia pingtungensis	√	√	√	√	√	√	√	√	√	√	√	×
	Cantherhines pardalis	NC_011325.1	Vertebrata;Gnathostomata;Teleostomi;Euteleostomi;Actinopterygii;Actinopteri;Neopterygii;Teleostei;Osteoglossocephalai;Clupeocephala;Euteleosteomorpha;Neoteleostei;Eurypterygia;Ctenosquamata;Acanthomorphata;Euacanthomorphacea;Percomorphaceae;Eupercaria;Tetraodontiformes;Balistoidea;Monacanthidae;Cantherhines;Cantherhines pardalis	√	√	√	√	√	√	√	√	×	√	√	×
	Canthidermis maculata	NC_011935.1	Vertebrata;Gnathostomata;Teleostomi;Euteleostomi;Actinopterygii;Actinopteri;Neopterygii;Teleostei;Osteoglossocephalai;Clupeocephala;Euteleosteomorpha;Neoteleostei;Eurypterygia;Ctenosquamata;Acanthomorphata;Euacanthomorphacea;Percomorphaceae;Eupercaria;Tetraodontiformes;Balistoidea;Balistidae;Canthidermis;Canthidermis maculata	√	√	√	√	√	√	√	√	×	√	√	×
	Canthigaster coronata	AP006743.1	Vertebrata;Gnathostomata;Teleostomi;Euteleostomi;Actinopterygii;Actinopteri;Neopterygii;Teleostei;Osteoglossocephalai;Clupeocephala;Euteleosteomorpha;Neoteleostei;Eurypterygia;Ctenosquamata;Acanthomorphata;Euacanthomorphacea;Percomorphaceae;Eupercaria;Tetraodontiformes;Tetraodontoidei;Tetradontoidea;Tetraodontidae;Canthigaster;Canthigaster coronata	√	√	√	√	√	√	√	√	×	√	√	×
	Canthigaster jactator	NC_015372.1	Vertebrata;Gnathostomata;Teleostomi;Euteleostomi;Actinopterygii;Actinopteri;Neopterygii;Teleostei;Osteoglossocephalai;Clupeocephala;Euteleosteomorpha;Neoteleostei;Eurypterygia;Ctenosquamata;Acanthomorphata;Euacanthomorphacea;Percomorphaceae;Eupercaria;Tetraodontiformes;Tetraodontoidei;Tetradontoidea;Tetraodontidae;Canthigaster;Canthigaster jactator	√	√	√	√	√	√	√	√	×	√	×	×
	Canthigaster rivulata	AP006744.1	Vertebrata;Gnathostomata;Teleostomi;Euteleostomi;Actinopterygii;Actinopteri;Neopterygii;Teleostei;Osteoglossocephalai;Clupeocephala;Euteleosteomorpha;Neoteleostei;Eurypterygia;Ctenosquamata;Acanthomorphata;Euacanthomorphacea;Percomorphaceae;Eupercaria;Tetraodontiformes;Tetraodontoidei;Tetradontoidea;Tetraodontidae;Canthigaster;Canthigaster rivulata	√	√	√	√	√	√	√	√	×	√	√	×
	Canthigaster valentini	NC_015337.1	Vertebrata;Gnathostomata;Teleostomi;Euteleostomi;Actinopterygii;Actinopteri;Neopterygii;Teleostei;Osteoglossocephalai;Clupeocephala;Euteleosteomorpha;Neoteleostei;Eurypterygia;Ctenosquamata;Acanthomorphata;Euacanthomorphacea;Percomorphaceae;Eupercaria;Tetraodontiformes;Tetraodontoidei;Tetradontoidea;Tetraodontidae;Canthigaster;Canthigaster valentini	√	√	√	√	√	√	√	√	×	√	√	×
	Capros aper	NC_010958.1	Vertebrata;Gnathostomata;Teleostomi;Euteleostomi;Actinopterygii;Actinopteri;Neopterygii;Teleostei;Osteoglossocephalai;Clupeocephala;Euteleosteomorpha;Neoteleostei;Eurypterygia;Ctenosquamata;Acanthomorphata;Euacanthomorphacea;Percomorphaceae;Eupercaria;Caproiformes;Caproidae;Capros;Capros aper	√	√	√	√	×	√	√	√	×	√	√	×
	Carangoides armatus	NC_004405.1	Vertebrata;Gnathostomata;Teleostomi;Euteleostomi;Actinopterygii;Actinopteri;Neopterygii;Teleostei;Osteoglossocephalai;Clupeocephala;Euteleosteomorpha;Neoteleostei;Eurypterygia;Ctenosquamata;Acanthomorphata;Euacanthomorphacea;Percomorphaceae;Carangaria;Carangiformes;Carangidae;Carangoides;Carangoides armatus	√	√	√	√	√	√	√	√	×	√	√	×
	Carangoides equula	KX373635.1	Vertebrata;Gnathostomata;Teleostomi;Euteleostomi;Actinopterygii;Actinopteri;Neopterygii;Teleostei;Osteoglossocephalai;Clupeocephala;Euteleosteomorpha;Neoteleostei;Eurypterygia;Ctenosquamata;Acanthomorphata;Euacanthomorphacea;Percomorphaceae;Carangaria;Carangiformes;Carangidae;Carangoides;Carangoides equula	√	√	√	√	√	√	√	√	×	√	√	×
	Carangoides malabaricus	NC_023968.1	Vertebrata;Gnathostomata;Teleostomi;Euteleostomi;Actinopterygii;Actinopteri;Neopterygii;Teleostei;Osteoglossocephalai;Clupeocephala;Euteleosteomorpha;Neoteleostei;Eurypterygia;Ctenosquamata;Acanthomorphata;Euacanthomorphacea;Percomorphaceae;Carangaria;Carangiformes;Carangidae;Carangoides;Carangoides malabaricus	√	√	√	√	√	√	√	√	×	√	√	×
	Carangoides plagiotaenia	MT677872.1	Vertebrata;Gnathostomata;Teleostomi;Euteleostomi;Actinopterygii;Actinopteri;Neopterygii;Teleostei;Osteoglossocephalai;Clupeocephala;Euteleosteomorpha;Neoteleostei;Eurypterygia;Ctenosquamata;Acanthomorphata;Euacanthomorphacea;Percomorphaceae;Carangaria;Carangiformes;Carangidae;Carangoides;Carangoides plagiotaenia	√	√	√	√	√	√	√	√	×	√	√	×
	Caranx ignobilis	NC_022932.1	Vertebrata;Gnathostomata;Teleostomi;Euteleostomi;Actinopterygii;Actinopteri;Neopterygii;Teleostei;Osteoglossocephalai;Clupeocephala;Euteleosteomorpha;Neoteleostei;Eurypterygia;Ctenosquamata;Acanthomorphata;Euacanthomorphacea;Percomorphaceae;Carangaria;Carangiformes;Carangidae;Caranx;Caranx ignobilis	√	√	√	√	√	√	√	√	×	√	×	×
	Caranx melampygus	KF649843.1	Vertebrata;Gnathostomata;Teleostomi;Euteleostomi;Actinopterygii;Actinopteri;Neopterygii;Teleostei;Osteoglossocephalai;Clupeocephala;Euteleosteomorpha;Neoteleostei;Eurypterygia;Ctenosquamata;Acanthomorphata;Euacanthomorphacea;Percomorphaceae;Carangaria;Carangiformes;Carangidae;Caranx;Caranx melampygus	√	√	√	√	√	√	√	√	×	√	√	×
	Caranx tille	NC_029421.1	Vertebrata;Gnathostomata;Teleostomi;Euteleostomi;Actinopterygii;Actinopteri;Neopterygii;Teleostei;Osteoglossocephalai;Clupeocephala;Euteleosteomorpha;Neoteleostei;Eurypterygia;Ctenosquamata;Acanthomorphata;Euacanthomorphacea;Percomorphaceae;Carangaria;Carangiformes;Carangidae;Caranx;Caranx tille	√	√	√	√	√	√	√	√	×	√	√	×
	Carapus bermudensis	NC_004373.1	Vertebrata;Gnathostomata;Teleostomi;Euteleostomi;Actinopterygii;Actinopteri;Neopterygii;Teleostei;Osteoglossocephalai;Clupeocephala;Euteleosteomorpha;Neoteleostei;Eurypterygia;Ctenosquamata;Acanthomorphata;Euacanthomorphacea;Percomorphaceae;Ophidiaria;Ophidiiformes;Ophidioidei;Ophidiidae;Carapinae;Carapus;Carapus bermudensis	√	√	√	√	√	√	√	√	×	√	×	×
	Carassioides acuminatus	NC_031430.1	Vertebrata;Gnathostomata;Teleostomi;Euteleostomi;Actinopterygii;Actinopteri;Neopterygii;Teleostei;Osteoglossocephalai;Clupeocephala;Otomorpha;Ostariophysi;Otophysi;Cypriniphysae;Cypriniformes;Cyprinoidei;Cyprinidae;Cyprininae;Carassioides;Carassioides acuminatus	√	√	√	√	√	√	√	√	√	√	√	×
	Carassius auratus	KX505165.1	Vertebrata;Gnathostomata;Teleostomi;Euteleostomi;Actinopterygii;Actinopteri;Neopterygii;Teleostei;Osteoglossocephalai;Clupeocephala;Otomorpha;Ostariophysi;Otophysi;Cypriniphysae;Cypriniformes;Cyprinoidei;Cyprinidae;Cyprininae;Carassius;Carassius auratus	√	√	√	√	√	√	√	√	√	√	√	×
	Carassius auratus auratus	MF443771.1	Vertebrata;Gnathostomata;Teleostomi;Euteleostomi;Actinopterygii;Actinopteri;Neopterygii;Teleostei;Osteoglossocephalai;Clupeocephala;Otomorpha;Ostariophysi;Otophysi;Cypriniphysae;Cypriniformes;Cyprinoidei;Cyprinidae;Cyprininae;Carassius;Carassius auratus;Carassius auratus auratus	√	√	√	√	√	√	√	√	√	√	√	×
	Carassius auratus 'high back crucian carp'	KT756205.1	Vertebrata;Gnathostomata;Teleostomi;Euteleostomi;Actinopterygii;Actinopteri;Neopterygii;Teleostei;Osteoglossocephalai;Clupeocephala;Otomorpha;Ostariophysi;Otophysi;Cypriniphysae;Cypriniformes;Cyprinoidei;Cyprinidae;Cyprininae;Carassius;Carassius auratus;Carassius auratus 'high back crucian carp'	√	√	√	√	√	√	√	√	√	√	√	×
	Carassius auratus ssp. 'Pingxiang'	NC_015142.1	Vertebrata;Gnathostomata;Teleostomi;Euteleostomi;Actinopterygii;Actinopteri;Neopterygii;Teleostei;Osteoglossocephalai;Clupeocephala;Otomorpha;Ostariophysi;Otophysi;Cypriniphysae;Cypriniformes;Cyprinoidei;Cyprinidae;Cyprininae;Carassius;Carassius auratus;Carassius auratus ssp. 'Pingxiang'	√	√	√	√	√	√	√	√	√	√	√	×
	Carassius auratus x Cyprinus carpio	AY694420.1	Vertebrata;Gnathostomata;Teleostomi;Euteleostomi;Actinopterygii;Actinopteri;Neopterygii;Teleostei;Osteoglossocephalai;Clupeocephala;Otomorpha;Ostariophysi;Otophysi;Cypriniphysae;Cypriniformes;Cyprinoidei;Cyprinoidei intergeneric hybrids;Carassius auratus x Cyprinus carpio	√	√	√	√	√	√	√	√	√	√	√	×
	Carassius auratus x Cyprinus carpio x Carassius cuvieri	AY771781.1	Vertebrata;Gnathostomata;Teleostomi;Euteleostomi;Actinopterygii;Actinopteri;Neopterygii;Teleostei;Osteoglossocephalai;Clupeocephala;Otomorpha;Ostariophysi;Otophysi;Cypriniphysae;Cypriniformes;Cyprinoidei;Cyprinoidei intergeneric hybrids;Carassius auratus x Cyprinus carpio x Carassius cuvieri	√	√	√	√	√	√	√	√	√	√	√	×
	Carassius auratus x Megalobrama amblycephala pentaploid hybrid	HQ401008.1	Vertebrata;Gnathostomata;Teleostomi;Euteleostomi;Actinopterygii;Actinopteri;Neopterygii;Teleostei;Osteoglossocephalai;Clupeocephala;Otomorpha;Ostariophysi;Otophysi;Cypriniphysae;Cypriniformes;Cyprinoidei;Cyprinoidei intergeneric hybrids;Carassius auratus x Megalobrama amblycephala pentaploid hybrid	√	√	√	√	√	√	√	√	√	√	√	×
	Carassius auratus x Megalobrama amblycephala tetraploid hybrid	GQ903705.1	Vertebrata;Gnathostomata;Teleostomi;Euteleostomi;Actinopterygii;Actinopteri;Neopterygii;Teleostei;Osteoglossocephalai;Clupeocephala;Otomorpha;Ostariophysi;Otophysi;Cypriniphysae;Cypriniformes;Cyprinoidei;Cyprinoidei intergeneric hybrids;Carassius auratus x Megalobrama amblycephala tetraploid hybrid	√	√	√	√	√	√	√	√	√	√	√	×
	Carassius auratus x Megalobrama amblycephala triploid hybrid	GQ903706.1	Vertebrata;Gnathostomata;Teleostomi;Euteleostomi;Actinopterygii;Actinopteri;Neopterygii;Teleostei;Osteoglossocephalai;Clupeocephala;Otomorpha;Ostariophysi;Otophysi;Cypriniphysae;Cypriniformes;Cyprinoidei;Cyprinoidei intergeneric hybrids;Carassius auratus x Megalobrama amblycephala triploid hybrid	√	√	√	√	√	√	√	√	√	√	√	×
	Carassius auratus x Megalobrama amblycephala x Carassius cuvieri	NC_035976.1	Vertebrata;Gnathostomata;Teleostomi;Euteleostomi;Actinopterygii;Actinopteri;Neopterygii;Teleostei;Osteoglossocephalai;Clupeocephala;Otomorpha;Ostariophysi;Otophysi;Cypriniphysae;Cypriniformes;Cyprinoidei;Cyprinidae;Cyprininae;Carassius;Carassius auratus x Megalobrama amblycephala x Carassius cuvieri	√	√	√	√	√	√	√	√	√	√	√	×
	Carassius carassius	KX781320.1	Vertebrata;Gnathostomata;Teleostomi;Euteleostomi;Actinopterygii;Actinopteri;Neopterygii;Teleostei;Osteoglossocephalai;Clupeocephala;Otomorpha;Ostariophysi;Otophysi;Cypriniphysae;Cypriniformes;Cyprinoidei;Cyprinidae;Cyprininae;Carassius;Carassius carassius	√	√	√	√	√	√	√	√	√	√	√	×
	Carassius cuvieri	NC_010768.1	Vertebrata;Gnathostomata;Teleostomi;Euteleostomi;Actinopterygii;Actinopteri;Neopterygii;Teleostei;Osteoglossocephalai;Clupeocephala;Otomorpha;Ostariophysi;Otophysi;Cypriniphysae;Cypriniformes;Cyprinoidei;Cyprinidae;Cyprininae;Carassius;Carassius cuvieri	√	√	√	√	√	√	√	√	√	√	√	×
	Carassius gibelio	KX505166.1	Vertebrata;Gnathostomata;Teleostomi;Euteleostomi;Actinopterygii;Actinopteri;Neopterygii;Teleostei;Osteoglossocephalai;Clupeocephala;Otomorpha;Ostariophysi;Otophysi;Cypriniphysae;Cypriniformes;Cyprinoidei;Cyprinidae;Cyprininae;Carassius;Carassius gibelio	√	√	√	√	√	√	√	√	√	√	√	×
	Carassius langsdorfii	NC_002079.1	Vertebrata;Gnathostomata;Teleostomi;Euteleostomi;Actinopterygii;Actinopteri;Neopterygii;Teleostei;Osteoglossocephalai;Clupeocephala;Otomorpha;Ostariophysi;Otophysi;Cypriniphysae;Cypriniformes;Cyprinoidei;Cyprinidae;Cyprininae;Carassius;Carassius langsdorfii	√	√	√	√	√	√	√	√	√	√	√	×
	Carinotetraodon lorteti	NC_015350.1	Vertebrata;Gnathostomata;Teleostomi;Euteleostomi;Actinopterygii;Actinopteri;Neopterygii;Teleostei;Osteoglossocephalai;Clupeocephala;Euteleosteomorpha;Neoteleostei;Eurypterygia;Ctenosquamata;Acanthomorphata;Euacanthomorphacea;Percomorphaceae;Eupercaria;Tetraodontiformes;Tetraodontoidei;Tetradontoidea;Tetraodontidae;Carinotetraodon;Carinotetraodon lorteti	√	√	√	√	√	√	√	√	×	√	×	×
	Carinotetraodon salivator	NC_015352.1	Vertebrata;Gnathostomata;Teleostomi;Euteleostomi;Actinopterygii;Actinopteri;Neopterygii;Teleostei;Osteoglossocephalai;Clupeocephala;Euteleosteomorpha;Neoteleostei;Eurypterygia;Ctenosquamata;Acanthomorphata;Euacanthomorphacea;Percomorphaceae;Eupercaria;Tetraodontiformes;Tetraodontoidei;Tetradontoidea;Tetraodontidae;Carinotetraodon;Carinotetraodon salivator	√	√	√	√	√	√	√	√	×	√	√	×
	Carinotetraodon travancoricus	MH631014.1	Vertebrata;Gnathostomata;Teleostomi;Euteleostomi;Actinopterygii;Actinopteri;Neopterygii;Teleostei;Osteoglossocephalai;Clupeocephala;Euteleosteomorpha;Neoteleostei;Eurypterygia;Ctenosquamata;Acanthomorphata;Euacanthomorphacea;Percomorphaceae;Eupercaria;Tetraodontiformes;Tetraodontoidei;Tetradontoidea;Tetraodontidae;Carinotetraodon;Carinotetraodon travancoricus	×	×	√	×	×	√	√	√	×	√	√	×
	Carnegiella strigata	AP011983.1	Vertebrata;Gnathostomata;Teleostomi;Euteleostomi;Actinopterygii;Actinopteri;Neopterygii;Teleostei;Osteoglossocephalai;Clupeocephala;Otomorpha;Ostariophysi;Otophysi;Characiphysae;Characiformes;Characoidei;Gasteropelecidae;Carnegiella;Carnegiella strigata	√	√	√	√	√	√	√	√	√	√	√	×
	Carpiodes carpio	AY366087.1	Vertebrata;Gnathostomata;Teleostomi;Euteleostomi;Actinopterygii;Actinopteri;Neopterygii;Teleostei;Osteoglossocephalai;Clupeocephala;Otomorpha;Ostariophysi;Otophysi;Cypriniphysae;Cypriniformes;Catostomoidei;Catostomidae;Carpiodes;Carpiodes carpio	√	√	√	√	√	√	√	√	√	√	√	×
	Cataetyx rubrirostris	NC_004375.1	Vertebrata;Gnathostomata;Teleostomi;Euteleostomi;Actinopterygii;Actinopteri;Neopterygii;Teleostei;Osteoglossocephalai;Clupeocephala;Euteleosteomorpha;Neoteleostei;Eurypterygia;Ctenosquamata;Acanthomorphata;Euacanthomorphacea;Percomorphaceae;Ophidiaria;Ophidiiformes;Bythitoidei;Bythitidae;Bythitinae;Cataetyx;Cataetyx rubrirostris	√	√	√	√	√	√	√	√	√	√	×	×
	Catostomus catostomus	MG570442.1	Vertebrata;Gnathostomata;Teleostomi;Euteleostomi;Actinopterygii;Actinopteri;Neopterygii;Teleostei;Osteoglossocephalai;Clupeocephala;Otomorpha;Ostariophysi;Otophysi;Cypriniphysae;Cypriniformes;Catostomoidei;Catostomidae;Catostomus;Catostomus catostomus	√	√	√	√	√	√	√	√	√	√	√	×
	Catostomus commersonii	MH324427.1	Vertebrata;Gnathostomata;Teleostomi;Euteleostomi;Actinopterygii;Actinopteri;Neopterygii;Teleostei;Osteoglossocephalai;Clupeocephala;Otomorpha;Ostariophysi;Otophysi;Cypriniphysae;Cypriniformes;Catostomoidei;Catostomidae;Catostomus;Catostomus commersonii	√	√	√	√	√	√	√	√	√	√	√	×
	Caulophryne jordani	AP004417.1	Vertebrata;Gnathostomata;Teleostomi;Euteleostomi;Actinopterygii;Actinopteri;Neopterygii;Teleostei;Osteoglossocephalai;Clupeocephala;Euteleosteomorpha;Neoteleostei;Eurypterygia;Ctenosquamata;Acanthomorphata;Euacanthomorphacea;Percomorphaceae;Eupercaria;Lophiiformes;Ceratioidei;Caulophrynidae;Caulophryne;Caulophryne jordani	√	√	√	√	×	√	√	√	×	√	√	×
	Caulophryne pelagica	NC_016020.1	Vertebrata;Gnathostomata;Teleostomi;Euteleostomi;Actinopterygii;Actinopteri;Neopterygii;Teleostei;Osteoglossocephalai;Clupeocephala;Euteleosteomorpha;Neoteleostei;Eurypterygia;Ctenosquamata;Acanthomorphata;Euacanthomorphacea;Percomorphaceae;Eupercaria;Lophiiformes;Ceratioidei;Caulophrynidae;Caulophryne;Caulophryne pelagica	√	√	√	√	×	√	√	√	×	√	√	×
	Centrolabrus exoletus	MT410926.1	Vertebrata;Gnathostomata;Teleostomi;Euteleostomi;Actinopterygii;Actinopteri;Neopterygii;Teleostei;Osteoglossocephalai;Clupeocephala;Euteleosteomorpha;Neoteleostei;Eurypterygia;Ctenosquamata;Acanthomorphata;Euacanthomorphacea;Percomorphaceae;Eupercaria;Labriformes;Labridae;Centrolabrus;Centrolabrus exoletus	√	√	√	√	√	√	√	√	×	√	√	×
	Centropristis striata	MH645336.1	Vertebrata;Gnathostomata;Teleostomi;Euteleostomi;Actinopterygii;Actinopteri;Neopterygii;Teleostei;Osteoglossocephalai;Clupeocephala;Euteleosteomorpha;Neoteleostei;Eurypterygia;Ctenosquamata;Acanthomorphata;Euacanthomorphacea;Percomorphaceae;Eupercaria;Perciformes;Serranoidei;Serranidae;Serraninae;Centropristis;Centropristis striata	√	√	√	√	√	√	√	√	×	√	×	×
	Centropyge acanthops	NC_028717.1	Vertebrata;Gnathostomata;Teleostomi;Euteleostomi;Actinopterygii;Actinopteri;Neopterygii;Teleostei;Osteoglossocephalai;Clupeocephala;Euteleosteomorpha;Neoteleostei;Eurypterygia;Ctenosquamata;Acanthomorphata;Euacanthomorphacea;Percomorphaceae;Eupercaria;Eupercaria incertae sedis;Pomacanthidae;Centropyge;Centropyge acanthops	√	√	√	√	√	√	√	√	×	√	√	×
	Centropyge aurantia	KP973959.1	Vertebrata;Gnathostomata;Teleostomi;Euteleostomi;Actinopterygii;Actinopteri;Neopterygii;Teleostei;Osteoglossocephalai;Clupeocephala;Euteleosteomorpha;Neoteleostei;Eurypterygia;Ctenosquamata;Acanthomorphata;Euacanthomorphacea;Percomorphaceae;Eupercaria;Eupercaria incertae sedis;Pomacanthidae;Centropyge;Centropyge aurantia	√	√	√	√	√	√	√	√	×	√	√	×
	Centropyge bispinosa	NC_028287.1	Vertebrata;Gnathostomata;Teleostomi;Euteleostomi;Actinopterygii;Actinopteri;Neopterygii;Teleostei;Osteoglossocephalai;Clupeocephala;Euteleosteomorpha;Neoteleostei;Eurypterygia;Ctenosquamata;Acanthomorphata;Euacanthomorphacea;Percomorphaceae;Eupercaria;Eupercaria incertae sedis;Pomacanthidae;Centropyge;Centropyge bispinosa	√	√	√	√	√	√	√	√	×	√	√	×
	Centropyge deborae	NC_036676.1	Vertebrata;Gnathostomata;Teleostomi;Euteleostomi;Actinopterygii;Actinopteri;Neopterygii;Teleostei;Osteoglossocephalai;Clupeocephala;Euteleosteomorpha;Neoteleostei;Eurypterygia;Ctenosquamata;Acanthomorphata;Euacanthomorphacea;Percomorphaceae;Eupercaria;Eupercaria incertae sedis;Pomacanthidae;Centropyge;Centropyge deborae	√	√	√	√	√	√	√	√	×	√	√	×
	Centropyge eibli	NC_027971.1	Vertebrata;Gnathostomata;Teleostomi;Euteleostomi;Actinopterygii;Actinopteri;Neopterygii;Teleostei;Osteoglossocephalai;Clupeocephala;Euteleosteomorpha;Neoteleostei;Eurypterygia;Ctenosquamata;Acanthomorphata;Euacanthomorphacea;Percomorphaceae;Eupercaria;Eupercaria incertae sedis;Pomacanthidae;Centropyge;Centropyge eibli	√	√	√	√	√	√	√	√	×	√	√	×
	Centropyge flavicauda	NC_028716.1	Vertebrata;Gnathostomata;Teleostomi;Euteleostomi;Actinopterygii;Actinopteri;Neopterygii;Teleostei;Osteoglossocephalai;Clupeocephala;Euteleosteomorpha;Neoteleostei;Eurypterygia;Ctenosquamata;Acanthomorphata;Euacanthomorphacea;Percomorphaceae;Eupercaria;Eupercaria incertae sedis;Pomacanthidae;Centropyge;Centropyge flavicauda	√	√	√	√	√	√	√	√	×	√	√	×
	Centropyge flavissima	KP973960.1	Vertebrata;Gnathostomata;Teleostomi;Euteleostomi;Actinopterygii;Actinopteri;Neopterygii;Teleostei;Osteoglossocephalai;Clupeocephala;Euteleosteomorpha;Neoteleostei;Eurypterygia;Ctenosquamata;Acanthomorphata;Euacanthomorphacea;Percomorphaceae;Eupercaria;Eupercaria incertae sedis;Pomacanthidae;Centropyge;Centropyge flavissima	√	√	√	√	√	√	√	√	×	√	√	×
	Centropyge heraldi	NC_027968.1	Vertebrata;Gnathostomata;Teleostomi;Euteleostomi;Actinopterygii;Actinopteri;Neopterygii;Teleostei;Osteoglossocephalai;Clupeocephala;Euteleosteomorpha;Neoteleostei;Eurypterygia;Ctenosquamata;Acanthomorphata;Euacanthomorphacea;Percomorphaceae;Eupercaria;Eupercaria incertae sedis;Pomacanthidae;Centropyge;Centropyge heraldi	√	√	√	√	√	√	√	√	×	√	√	×
	Centropyge interrupta	KU365899.1	Vertebrata;Gnathostomata;Teleostomi;Euteleostomi;Actinopterygii;Actinopteri;Neopterygii;Teleostei;Osteoglossocephalai;Clupeocephala;Euteleosteomorpha;Neoteleostei;Eurypterygia;Ctenosquamata;Acanthomorphata;Euacanthomorphacea;Percomorphaceae;Eupercaria;Eupercaria incertae sedis;Pomacanthidae;Centropyge;Centropyge interrupta	√	√	√	√	√	√	√	√	×	√	√	×
	Centropyge joculator	NC_027652.1	Vertebrata;Gnathostomata;Teleostomi;Euteleostomi;Actinopterygii;Actinopteri;Neopterygii;Teleostei;Osteoglossocephalai;Clupeocephala;Euteleosteomorpha;Neoteleostei;Eurypterygia;Ctenosquamata;Acanthomorphata;Euacanthomorphacea;Percomorphaceae;Eupercaria;Eupercaria incertae sedis;Pomacanthidae;Centropyge;Centropyge joculator	√	√	√	√	√	√	√	√	×	√	√	×
	Centropyge loriculus	NC_009872.1	Vertebrata;Gnathostomata;Teleostomi;Euteleostomi;Actinopterygii;Actinopteri;Neopterygii;Teleostei;Osteoglossocephalai;Clupeocephala;Euteleosteomorpha;Neoteleostei;Eurypterygia;Ctenosquamata;Acanthomorphata;Euacanthomorphacea;Percomorphaceae;Eupercaria;Eupercaria incertae sedis;Pomacanthidae;Centropyge;Centropyge loriculus	√	√	√	√	√	√	√	√	×	√	√	×
	Centropyge multicolor	NC_027651.1	Vertebrata;Gnathostomata;Teleostomi;Euteleostomi;Actinopterygii;Actinopteri;Neopterygii;Teleostei;Osteoglossocephalai;Clupeocephala;Euteleosteomorpha;Neoteleostei;Eurypterygia;Ctenosquamata;Acanthomorphata;Euacanthomorphacea;Percomorphaceae;Eupercaria;Eupercaria incertae sedis;Pomacanthidae;Centropyge;Centropyge multicolor	√	√	√	√	√	√	√	√	×	√	√	×
	Centropyge multifasciata	NC_027599.1	Vertebrata;Gnathostomata;Teleostomi;Euteleostomi;Actinopterygii;Actinopteri;Neopterygii;Teleostei;Osteoglossocephalai;Clupeocephala;Euteleosteomorpha;Neoteleostei;Eurypterygia;Ctenosquamata;Acanthomorphata;Euacanthomorphacea;Percomorphaceae;Eupercaria;Eupercaria incertae sedis;Pomacanthidae;Centropyge;Centropyge multifasciata	√	√	√	√	√	√	×	√	×	√	√	×
	Centropyge nox	NC_034953.1	Vertebrata;Gnathostomata;Teleostomi;Euteleostomi;Actinopterygii;Actinopteri;Neopterygii;Teleostei;Osteoglossocephalai;Clupeocephala;Euteleosteomorpha;Neoteleostei;Eurypterygia;Ctenosquamata;Acanthomorphata;Euacanthomorphacea;Percomorphaceae;Eupercaria;Eupercaria incertae sedis;Pomacanthidae;Centropyge;Centropyge nox	√	√	√	√	√	√	√	√	×	√	√	×
	Centropyge venusta	NC_027598.1	Vertebrata;Gnathostomata;Teleostomi;Euteleostomi;Actinopterygii;Actinopteri;Neopterygii;Teleostei;Osteoglossocephalai;Clupeocephala;Euteleosteomorpha;Neoteleostei;Eurypterygia;Ctenosquamata;Acanthomorphata;Euacanthomorphacea;Percomorphaceae;Eupercaria;Eupercaria incertae sedis;Pomacanthidae;Centropyge;Centropyge venusta	√	√	√	√	√	√	×	√	×	√	√	×
	Centropyge vrolikii	NC_036949.1	Vertebrata;Gnathostomata;Teleostomi;Euteleostomi;Actinopterygii;Actinopteri;Neopterygii;Teleostei;Osteoglossocephalai;Clupeocephala;Euteleosteomorpha;Neoteleostei;Eurypterygia;Ctenosquamata;Acanthomorphata;Euacanthomorphacea;Percomorphaceae;Eupercaria;Eupercaria incertae sedis;Pomacanthidae;Centropyge;Centropyge vrolikii	√	√	√	√	√	√	√	√	×	√	√	×
	Centropyge woodheadi	NC_027969.1	Vertebrata;Gnathostomata;Teleostomi;Euteleostomi;Actinopterygii;Actinopteri;Neopterygii;Teleostei;Osteoglossocephalai;Clupeocephala;Euteleosteomorpha;Neoteleostei;Eurypterygia;Ctenosquamata;Acanthomorphata;Euacanthomorphacea;Percomorphaceae;Eupercaria;Eupercaria incertae sedis;Pomacanthidae;Centropyge;Centropyge woodheadi	√	√	√	√	√	√	√	√	×	√	√	×
	Cephalopholis argus	NC_022142.1	Vertebrata;Gnathostomata;Teleostomi;Euteleostomi;Actinopterygii;Actinopteri;Neopterygii;Teleostei;Osteoglossocephalai;Clupeocephala;Euteleosteomorpha;Neoteleostei;Eurypterygia;Ctenosquamata;Acanthomorphata;Euacanthomorphacea;Percomorphaceae;Eupercaria;Perciformes;Serranoidei;Serranidae;Epinephelinae;Epinephelini;Cephalopholis;Cephalopholis argus	√	√	√	√	√	√	√	√	×	√	√	×
	Cephalopholis boenak	NC_021134.1	Vertebrata;Gnathostomata;Teleostomi;Euteleostomi;Actinopterygii;Actinopteri;Neopterygii;Teleostei;Osteoglossocephalai;Clupeocephala;Euteleosteomorpha;Neoteleostei;Eurypterygia;Ctenosquamata;Acanthomorphata;Euacanthomorphacea;Percomorphaceae;Eupercaria;Perciformes;Serranoidei;Serranidae;Epinephelinae;Epinephelini;Cephalopholis;Cephalopholis boenak	√	√	√	√	√	√	√	√	×	√	√	×
	Cephalopholis sexmaculata	NC_024100.1	Vertebrata;Gnathostomata;Teleostomi;Euteleostomi;Actinopterygii;Actinopteri;Neopterygii;Teleostei;Osteoglossocephalai;Clupeocephala;Euteleosteomorpha;Neoteleostei;Eurypterygia;Ctenosquamata;Acanthomorphata;Euacanthomorphacea;Percomorphaceae;Eupercaria;Perciformes;Serranoidei;Serranidae;Epinephelinae;Epinephelini;Cephalopholis;Cephalopholis sexmaculata	√	√	√	√	√	√	√	√	×	√	√	×
	Cephalopholis sonnerati	NC_022143.1	Vertebrata;Gnathostomata;Teleostomi;Euteleostomi;Actinopterygii;Actinopteri;Neopterygii;Teleostei;Osteoglossocephalai;Clupeocephala;Euteleosteomorpha;Neoteleostei;Eurypterygia;Ctenosquamata;Acanthomorphata;Euacanthomorphacea;Percomorphaceae;Eupercaria;Perciformes;Serranoidei;Serranidae;Epinephelinae;Epinephelini;Cephalopholis;Cephalopholis sonnerati	√	√	√	√	√	√	√	√	×	√	√	×
	Cephalopholis urodeta	NC_030057.1	Vertebrata;Gnathostomata;Teleostomi;Euteleostomi;Actinopterygii;Actinopteri;Neopterygii;Teleostei;Osteoglossocephalai;Clupeocephala;Euteleosteomorpha;Neoteleostei;Eurypterygia;Ctenosquamata;Acanthomorphata;Euacanthomorphacea;Percomorphaceae;Eupercaria;Perciformes;Serranoidei;Serranidae;Epinephelinae;Epinephelini;Cephalopholis;Cephalopholis urodeta	√	√	√	√	√	√	√	√	×	√	×	×
	Ceratias uranoscopus	NC_013882.1	Vertebrata;Gnathostomata;Teleostomi;Euteleostomi;Actinopterygii;Actinopteri;Neopterygii;Teleostei;Osteoglossocephalai;Clupeocephala;Euteleosteomorpha;Neoteleostei;Eurypterygia;Ctenosquamata;Acanthomorphata;Euacanthomorphacea;Percomorphaceae;Eupercaria;Lophiiformes;Ceratioidei;Ceratiidae;Ceratias;Ceratias uranoscopus	√	√	√	√	×	√	√	√	×	√	√	×
	Cetomimus sp. AMS I34481001	NC_012048.1	Vertebrata;Gnathostomata;Teleostomi;Euteleostomi;Actinopterygii;Actinopteri;Neopterygii;Teleostei;Osteoglossocephalai;Clupeocephala;Euteleosteomorpha;Neoteleostei;Eurypterygia;Ctenosquamata;Acanthomorphata;Euacanthomorphacea;Berycimorphaceae;Beryciformes;Cetomimidae;Cetomimus;unclassified Cetomimus;Cetomimus sp. AMS I34481001	√	√	√	√	√	√	√	√	×	√	√	×
	Cetonurus globiceps	NC_027436.1	Vertebrata;Gnathostomata;Teleostomi;Euteleostomi;Actinopterygii;Actinopteri;Neopterygii;Teleostei;Osteoglossocephalai;Clupeocephala;Euteleosteomorpha;Neoteleostei;Eurypterygia;Ctenosquamata;Acanthomorphata;Paracanthopterygii;Zeiogadaria;Gadariae;Gadiformes;Macrouroidei;Macrouridae;Macrourinae;Cetonurus;Cetonurus globiceps	√	√	×	√	√	√	√	√	×	√	√	×
	Cetopsidium sp. NM-2010	AP012007.1	Vertebrata;Gnathostomata;Teleostomi;Euteleostomi;Actinopterygii;Actinopteri;Neopterygii;Teleostei;Osteoglossocephalai;Clupeocephala;Otomorpha;Ostariophysi;Otophysi;Characiphysae;Siluriformes;Siluroidei;Cetopsidae;Cetopsidium;unclassified Cetopsidium;Cetopsidium sp. NM-2010	√	√	√	√	√	√	√	√	√	√	√	×
	Cetostoma regani	NC_004389.1	Vertebrata;Gnathostomata;Teleostomi;Euteleostomi;Actinopterygii;Actinopteri;Neopterygii;Teleostei;Osteoglossocephalai;Clupeocephala;Euteleosteomorpha;Neoteleostei;Eurypterygia;Ctenosquamata;Acanthomorphata;Euacanthomorphacea;Berycimorphaceae;Beryciformes;Cetomimidae;Cetostoma;Cetostoma regani	√	√	√	√	√	√	√	√	√	√	√	×
	cf. Bagridae sp. XL-2016	KX347977.1	Vertebrata;Gnathostomata;Teleostomi;Euteleostomi;Actinopterygii;Actinopteri;Neopterygii;Teleostei;Osteoglossocephalai;Clupeocephala;Otomorpha;Ostariophysi;Otophysi;Characiphysae;Siluriformes;unclassified Siluriformes;cf. Bagridae sp. XL-2016	√	√	√	√	√	√	√	√	√	√	√	√
	Chaca bankanensis	AP012008.1	Vertebrata;Gnathostomata;Teleostomi;Euteleostomi;Actinopterygii;Actinopteri;Neopterygii;Teleostei;Osteoglossocephalai;Clupeocephala;Otomorpha;Ostariophysi;Otophysi;Characiphysae;Siluriformes;Siluroidei;Chacidae;Chaca;Chaca bankanensis	√	√	√	√	√	√	√	√	√	√	√	×
	Chaenocephalus aceratus	JF933907.1	Vertebrata;Gnathostomata;Teleostomi;Euteleostomi;Actinopterygii;Actinopteri;Neopterygii;Teleostei;Osteoglossocephalai;Clupeocephala;Euteleosteomorpha;Neoteleostei;Eurypterygia;Ctenosquamata;Acanthomorphata;Euacanthomorphacea;Percomorphaceae;Eupercaria;Perciformes;Notothenioidei;Channichthyidae;Chaenocephalus;Chaenocephalus aceratus	√	√	√	√	√	√	√	√	√	√	×	×
	Chaenodraco wilsoni	NC_039158.1	Vertebrata;Gnathostomata;Teleostomi;Euteleostomi;Actinopterygii;Actinopteri;Neopterygii;Teleostei;Osteoglossocephalai;Clupeocephala;Euteleosteomorpha;Neoteleostei;Eurypterygia;Ctenosquamata;Acanthomorphata;Euacanthomorphacea;Percomorphaceae;Eupercaria;Perciformes;Notothenioidei;Channichthyidae;Chaenodraco;Chaenodraco wilsoni	√	√	√	√	√	√	√	√	×	√	√	×
	Chaenogobius gulosus	NC_027193.1	Vertebrata;Gnathostomata;Teleostomi;Euteleostomi;Actinopterygii;Actinopteri;Neopterygii;Teleostei;Osteoglossocephalai;Clupeocephala;Euteleosteomorpha;Neoteleostei;Eurypterygia;Ctenosquamata;Acanthomorphata;Euacanthomorphacea;Percomorphaceae;Gobiaria;Gobiiformes;Gobioidei;Gobiidae;Gobionellinae;Chaenogobius;Chaenogobius gulosus	√	√	√	√	√	√	√	√	√	√	√	×
	Chaenomugil proboscideus	JF911705.1	Vertebrata;Gnathostomata;Teleostomi;Euteleostomi;Actinopterygii;Actinopteri;Neopterygii;Teleostei;Osteoglossocephalai;Clupeocephala;Euteleosteomorpha;Neoteleostei;Eurypterygia;Ctenosquamata;Acanthomorphata;Euacanthomorphacea;Percomorphaceae;Ovalentaria;Mugilomorphae;Mugiliformes;Mugilidae;Chaenomugil;Chaenomugil proboscideus	√	√	√	√	√	√	√	√	×	√	×	×
	Chaetobranchopsis bitaeniatus	NC_033542.1	Vertebrata;Gnathostomata;Teleostomi;Euteleostomi;Actinopterygii;Actinopteri;Neopterygii;Teleostei;Osteoglossocephalai;Clupeocephala;Euteleosteomorpha;Neoteleostei;Eurypterygia;Ctenosquamata;Acanthomorphata;Euacanthomorphacea;Percomorphaceae;Ovalentaria;Cichlomorphae;Cichliformes;Cichlidae;New World cichlids;Astronotinae;Chaetobranchini;Chaetobranchopsis;Chaetobranchopsis bitaeniatus	√	√	√	√	√	√	√	√	×	√	√	×
	Chaetodermis penicilligerus	NC_011951.1	Vertebrata;Gnathostomata;Teleostomi;Euteleostomi;Actinopterygii;Actinopteri;Neopterygii;Teleostei;Osteoglossocephalai;Clupeocephala;Euteleosteomorpha;Neoteleostei;Eurypterygia;Ctenosquamata;Acanthomorphata;Euacanthomorphacea;Percomorphaceae;Eupercaria;Tetraodontiformes;Balistoidea;Monacanthidae;Chaetodermis;Chaetodermis penicilligerus	√	√	√	√	√	√	√	√	×	√	×	×
	Chaetodon auripes	NC_009870.1	Vertebrata;Gnathostomata;Teleostomi;Euteleostomi;Actinopterygii;Actinopteri;Neopterygii;Teleostei;Osteoglossocephalai;Clupeocephala;Euteleosteomorpha;Neoteleostei;Eurypterygia;Ctenosquamata;Acanthomorphata;Euacanthomorphacea;Percomorphaceae;Eupercaria;Chaetodontiformes;Chaetodontidae;Chaetodon;Chaetodon auripes	√	√	√	√	√	√	√	√	×	√	√	×
	Chaetodon octofasciatus	NC_040865.1	Vertebrata;Gnathostomata;Teleostomi;Euteleostomi;Actinopterygii;Actinopteri;Neopterygii;Teleostei;Osteoglossocephalai;Clupeocephala;Euteleosteomorpha;Neoteleostei;Eurypterygia;Ctenosquamata;Acanthomorphata;Euacanthomorphacea;Percomorphaceae;Eupercaria;Chaetodontiformes;Chaetodontidae;Chaetodon;Chaetodon octofasciatus	√	√	√	√	√	√	√	√	×	√	√	×
	Chaetodon wiebeli	NC_048979.1	Vertebrata;Gnathostomata;Teleostomi;Euteleostomi;Actinopterygii;Actinopteri;Neopterygii;Teleostei;Osteoglossocephalai;Clupeocephala;Euteleosteomorpha;Neoteleostei;Eurypterygia;Ctenosquamata;Acanthomorphata;Euacanthomorphacea;Percomorphaceae;Eupercaria;Chaetodontiformes;Chaetodontidae;Chaetodon;Chaetodon wiebeli	√	√	√	√	√	√	√	√	×	√	√	×
	Chaetodontoplus conspicillatus	NC_026883.1	Vertebrata;Gnathostomata;Teleostomi;Euteleostomi;Actinopterygii;Actinopteri;Neopterygii;Teleostei;Osteoglossocephalai;Clupeocephala;Euteleosteomorpha;Neoteleostei;Eurypterygia;Ctenosquamata;Acanthomorphata;Euacanthomorphacea;Percomorphaceae;Eupercaria;Eupercaria incertae sedis;Pomacanthidae;Chaetodontoplus;Chaetodontoplus conspicillatus	√	√	√	√	√	√	√	√	×	√	√	×
	Chaetodontoplus mesoleucus	NC_026521.1	Vertebrata;Gnathostomata;Teleostomi;Euteleostomi;Actinopterygii;Actinopteri;Neopterygii;Teleostei;Osteoglossocephalai;Clupeocephala;Euteleosteomorpha;Neoteleostei;Eurypterygia;Ctenosquamata;Acanthomorphata;Euacanthomorphacea;Percomorphaceae;Eupercaria;Eupercaria incertae sedis;Pomacanthidae;Chaetodontoplus;Chaetodontoplus mesoleucus	√	√	√	√	√	√	√	√	×	√	×	×
	Chaetodontoplus poliourus	NC_044485.1	Vertebrata;Gnathostomata;Teleostomi;Euteleostomi;Actinopterygii;Actinopteri;Neopterygii;Teleostei;Osteoglossocephalai;Clupeocephala;Euteleosteomorpha;Neoteleostei;Eurypterygia;Ctenosquamata;Acanthomorphata;Euacanthomorphacea;Percomorphaceae;Eupercaria;Eupercaria incertae sedis;Pomacanthidae;Chaetodontoplus;Chaetodontoplus poliourus	√	√	√	√	√	√	√	√	×	√	√	×
	Chaetodontoplus septentrionalis	NC_009873.1	Vertebrata;Gnathostomata;Teleostomi;Euteleostomi;Actinopterygii;Actinopteri;Neopterygii;Teleostei;Osteoglossocephalai;Clupeocephala;Euteleosteomorpha;Neoteleostei;Eurypterygia;Ctenosquamata;Acanthomorphata;Euacanthomorphacea;Percomorphaceae;Eupercaria;Eupercaria incertae sedis;Pomacanthidae;Chaetodontoplus;Chaetodontoplus septentrionalis	√	√	√	√	√	√	√	√	×	√	×	×
	Chaeturichthys stigmatias	NC_020786.1	Vertebrata;Gnathostomata;Teleostomi;Euteleostomi;Actinopterygii;Actinopteri;Neopterygii;Teleostei;Osteoglossocephalai;Clupeocephala;Euteleosteomorpha;Neoteleostei;Eurypterygia;Ctenosquamata;Acanthomorphata;Euacanthomorphacea;Percomorphaceae;Gobiaria;Gobiiformes;Gobioidei;Gobiidae;Gobionellinae;Chaeturichthys;Chaeturichthys stigmatias	√	√	√	√	√	√	√	√	√	√	√	×
	Chalceus macrolepidotus	NC_004700.1	Vertebrata;Gnathostomata;Teleostomi;Euteleostomi;Actinopterygii;Actinopteri;Neopterygii;Teleostei;Osteoglossocephalai;Clupeocephala;Otomorpha;Ostariophysi;Otophysi;Characiphysae;Characiformes;Characoidei;Chalceidae;Chalceus;Chalceus macrolepidotus	√	√	√	√	√	√	√	√	√	√	×	×
	Champsocephalus gunnari	NC_018340.1	Vertebrata;Gnathostomata;Teleostomi;Euteleostomi;Actinopterygii;Actinopteri;Neopterygii;Teleostei;Osteoglossocephalai;Clupeocephala;Euteleosteomorpha;Neoteleostei;Eurypterygia;Ctenosquamata;Acanthomorphata;Euacanthomorphacea;Percomorphaceae;Eupercaria;Perciformes;Notothenioidei;Channichthyidae;Champsocephalus;Champsocephalus gunnari	√	√	√	√	√	√	√	√	×	√	√	×
	Champsodon cf. snyderi CBM-ZF 10876	NC_022483.1	Vertebrata;Gnathostomata;Teleostomi;Euteleostomi;Actinopterygii;Actinopteri;Neopterygii;Teleostei;Osteoglossocephalai;Clupeocephala;Euteleosteomorpha;Neoteleostei;Eurypterygia;Ctenosquamata;Acanthomorphata;Euacanthomorphacea;Percomorphaceae;Eupercaria;Pempheriformes;Champsodontidae;Champsodon;Champsodon cf. snyderi CBM-ZF 10876	√	√	√	√	√	√	√	√	×	√	√	×
	Channa argus	MG751766.1	Vertebrata;Gnathostomata;Teleostomi;Euteleostomi;Actinopterygii;Actinopteri;Neopterygii;Teleostei;Osteoglossocephalai;Clupeocephala;Euteleosteomorpha;Neoteleostei;Eurypterygia;Ctenosquamata;Acanthomorphata;Euacanthomorphacea;Percomorphaceae;Anabantaria;Anabantiformes;Channoidei;Channidae;Channa;Channa argus	√	√	√	√	√	√	√	√	×	√	×	×
	Channa argus kimurai	KM077026.1	Vertebrata;Gnathostomata;Teleostomi;Euteleostomi;Actinopterygii;Actinopteri;Neopterygii;Teleostei;Osteoglossocephalai;Clupeocephala;Euteleosteomorpha;Neoteleostei;Eurypterygia;Ctenosquamata;Acanthomorphata;Euacanthomorphacea;Percomorphaceae;Anabantaria;Anabantiformes;Channoidei;Channidae;Channa;Channa argus;Channa argus kimurai	√	√	√	√	√	√	√	√	×	√	×	×
	Channa argus x Channa maculata	KC823604.1	Vertebrata;Gnathostomata;Teleostomi;Euteleostomi;Actinopterygii;Actinopteri;Neopterygii;Teleostei;Osteoglossocephalai;Clupeocephala;Euteleosteomorpha;Neoteleostei;Eurypterygia;Ctenosquamata;Acanthomorphata;Euacanthomorphacea;Percomorphaceae;Anabantaria;Anabantiformes;Channoidei;Channidae;Channa;Channa argus x Channa maculata	√	√	√	√	√	√	√	√	×	√	×	×
	Channa asiatica	NC_025225.1	Vertebrata;Gnathostomata;Teleostomi;Euteleostomi;Actinopterygii;Actinopteri;Neopterygii;Teleostei;Osteoglossocephalai;Clupeocephala;Euteleosteomorpha;Neoteleostei;Eurypterygia;Ctenosquamata;Acanthomorphata;Euacanthomorphacea;Percomorphaceae;Anabantaria;Anabantiformes;Channoidei;Channidae;Channa;Channa asiatica	√	√	√	√	√	√	√	√	×	√	√	×
	Channa diplogramma	MG986721.1	Vertebrata;Gnathostomata;Teleostomi;Euteleostomi;Actinopterygii;Actinopteri;Neopterygii;Teleostei;Osteoglossocephalai;Clupeocephala;Euteleosteomorpha;Neoteleostei;Eurypterygia;Ctenosquamata;Acanthomorphata;Euacanthomorphacea;Percomorphaceae;Anabantaria;Anabantiformes;Channoidei;Channidae;Channa;Channa diplogramma	√	√	√	√	√	√	√	√	×	√	×	×
	Channa gachua	MK371068.1	Vertebrata;Gnathostomata;Teleostomi;Euteleostomi;Actinopterygii;Actinopteri;Neopterygii;Teleostei;Osteoglossocephalai;Clupeocephala;Euteleosteomorpha;Neoteleostei;Eurypterygia;Ctenosquamata;Acanthomorphata;Euacanthomorphacea;Percomorphaceae;Anabantaria;Anabantiformes;Channoidei;Channidae;Channa;Channa gachua	√	√	√	√	√	√	√	√	×	√	√	×
	Channa lucius	MF804538.1	Vertebrata;Gnathostomata;Teleostomi;Euteleostomi;Actinopterygii;Actinopteri;Neopterygii;Teleostei;Osteoglossocephalai;Clupeocephala;Euteleosteomorpha;Neoteleostei;Eurypterygia;Ctenosquamata;Acanthomorphata;Euacanthomorphacea;Percomorphaceae;Anabantaria;Anabantiformes;Channoidei;Channidae;Channa;Channa lucius	√	√	√	√	√	√	√	√	×	√	√	×
	Channa maculata	KC310861.1	Vertebrata;Gnathostomata;Teleostomi;Euteleostomi;Actinopterygii;Actinopteri;Neopterygii;Teleostei;Osteoglossocephalai;Clupeocephala;Euteleosteomorpha;Neoteleostei;Eurypterygia;Ctenosquamata;Acanthomorphata;Euacanthomorphacea;Percomorphaceae;Anabantaria;Anabantiformes;Channoidei;Channidae;Channa;Channa maculata	√	√	√	√	√	√	√	√	×	√	√	×
	Channa marulius	NC_022713.1	Vertebrata;Gnathostomata;Teleostomi;Euteleostomi;Actinopterygii;Actinopteri;Neopterygii;Teleostei;Osteoglossocephalai;Clupeocephala;Euteleosteomorpha;Neoteleostei;Eurypterygia;Ctenosquamata;Acanthomorphata;Euacanthomorphacea;Percomorphaceae;Anabantaria;Anabantiformes;Channoidei;Channidae;Channa;Channa marulius	√	√	√	√	√	√	√	√	×	√	√	×
	Channa micropeltes	NC_030542.1	Vertebrata;Gnathostomata;Teleostomi;Euteleostomi;Actinopterygii;Actinopteri;Neopterygii;Teleostei;Osteoglossocephalai;Clupeocephala;Euteleosteomorpha;Neoteleostei;Eurypterygia;Ctenosquamata;Acanthomorphata;Euacanthomorphacea;Percomorphaceae;Anabantaria;Anabantiformes;Channoidei;Channidae;Channa;Channa micropeltes	√	√	√	√	√	√	√	√	×	√	×	×
	Channa punctata	NC_042213.1	Vertebrata;Gnathostomata;Teleostomi;Euteleostomi;Actinopterygii;Actinopteri;Neopterygii;Teleostei;Osteoglossocephalai;Clupeocephala;Euteleosteomorpha;Neoteleostei;Eurypterygia;Ctenosquamata;Acanthomorphata;Euacanthomorphacea;Percomorphaceae;Anabantaria;Anabantiformes;Channoidei;Channidae;Channa;Channa punctata	√	√	√	√	√	√	√	√	×	√	×	×
	Channa striata	MN205549.1	Vertebrata;Gnathostomata;Teleostomi;Euteleostomi;Actinopterygii;Actinopteri;Neopterygii;Teleostei;Osteoglossocephalai;Clupeocephala;Euteleosteomorpha;Neoteleostei;Eurypterygia;Ctenosquamata;Acanthomorphata;Euacanthomorphacea;Percomorphaceae;Anabantaria;Anabantiformes;Channoidei;Channidae;Channa;Channa striata	√	√	√	√	√	√	√	√	×	√	√	×
	Chanodichthys dabryi	NC_021418.1	Vertebrata;Gnathostomata;Teleostomi;Euteleostomi;Actinopterygii;Actinopteri;Neopterygii;Teleostei;Osteoglossocephalai;Clupeocephala;Otomorpha;Ostariophysi;Otophysi;Cypriniphysae;Cypriniformes;Cyprinoidei;Xenocyprididae;Xenocypridinae;Chanodichthys;Chanodichthys dabryi	√	√	√	√	√	√	√	√	√	√	√	×
	Chanodichthys erythropterus	NC_024749.1	Vertebrata;Gnathostomata;Teleostomi;Euteleostomi;Actinopterygii;Actinopteri;Neopterygii;Teleostei;Osteoglossocephalai;Clupeocephala;Otomorpha;Ostariophysi;Otophysi;Cypriniphysae;Cypriniformes;Cyprinoidei;Xenocyprididae;Xenocypridinae;Chanodichthys;Chanodichthys erythropterus	√	√	√	√	√	√	√	√	√	√	√	×
	Chanodichthys ilishaeformis	NC_029722.1	Vertebrata;Gnathostomata;Teleostomi;Euteleostomi;Actinopterygii;Actinopteri;Neopterygii;Teleostei;Osteoglossocephalai;Clupeocephala;Otomorpha;Ostariophysi;Otophysi;Cypriniphysae;Cypriniformes;Cyprinoidei;Xenocyprididae;Xenocypridinae;Chanodichthys;Chanodichthys ilishaeformis	√	√	√	√	√	√	√	√	√	√	√	×
	Chanodichthys mongolicus	KF826087.1	Vertebrata;Gnathostomata;Teleostomi;Euteleostomi;Actinopterygii;Actinopteri;Neopterygii;Teleostei;Osteoglossocephalai;Clupeocephala;Otomorpha;Ostariophysi;Otophysi;Cypriniphysae;Cypriniformes;Cyprinoidei;Xenocyprididae;Xenocypridinae;Chanodichthys;Chanodichthys mongolicus	√	√	√	√	√	√	√	√	√	√	√	×
	Chanodichthys recurviceps	NC_024277.1	Vertebrata;Gnathostomata;Teleostomi;Euteleostomi;Actinopterygii;Actinopteri;Neopterygii;Teleostei;Osteoglossocephalai;Clupeocephala;Otomorpha;Ostariophysi;Otophysi;Cypriniphysae;Cypriniformes;Cyprinoidei;Xenocyprididae;Xenocypridinae;Chanodichthys;Chanodichthys recurviceps	√	√	√	√	√	√	√	√	√	√	√	×
	Chanos chanos	NC_004693.1	Vertebrata;Gnathostomata;Teleostomi;Euteleostomi;Actinopterygii;Actinopteri;Neopterygii;Teleostei;Osteoglossocephalai;Clupeocephala;Otomorpha;Ostariophysi;Anotophysi;Gonorynchiformes;Chanoidei;Chanidae;Chanos;Chanos chanos	√	√	√	√	√	√	√	√	×	√	√	×
	Chascanopsetta lugubris	NC_033392.1	Vertebrata;Gnathostomata;Teleostomi;Euteleostomi;Actinopterygii;Actinopteri;Neopterygii;Teleostei;Osteoglossocephalai;Clupeocephala;Euteleosteomorpha;Neoteleostei;Eurypterygia;Ctenosquamata;Acanthomorphata;Euacanthomorphacea;Percomorphaceae;Carangaria;Pleuronectiformes;Pleuronectoidei;Bothidae;Chascanopsetta;Chascanopsetta lugubris	√	√	√	√	√	√	√	√	√	√	×	×
	Chauliodus sloani	NC_003159.1	Vertebrata;Gnathostomata;Teleostomi;Euteleostomi;Actinopterygii;Actinopteri;Neopterygii;Teleostei;Osteoglossocephalai;Clupeocephala;Euteleosteomorpha;Stomiati;Stomiiformes;Stomiidae;Chauliodontinae;Chauliodus;Chauliodus sloani	√	√	√	√	√	√	√	√	×	√	√	×
	Chaunax abei	NC_004381.1	Vertebrata;Gnathostomata;Teleostomi;Euteleostomi;Actinopterygii;Actinopteri;Neopterygii;Teleostei;Osteoglossocephalai;Clupeocephala;Euteleosteomorpha;Neoteleostei;Eurypterygia;Ctenosquamata;Acanthomorphata;Euacanthomorphacea;Percomorphaceae;Eupercaria;Lophiiformes;Chaunacoidei;Chaunacidae;Chaunax;Chaunax abei	√	√	√	√	√	√	√	√	×	√	×	×
	Chaunax penicillatus	NC_004382.1	Vertebrata;Gnathostomata;Teleostomi;Euteleostomi;Actinopterygii;Actinopteri;Neopterygii;Teleostei;Osteoglossocephalai;Clupeocephala;Euteleosteomorpha;Neoteleostei;Eurypterygia;Ctenosquamata;Acanthomorphata;Euacanthomorphacea;Percomorphaceae;Eupercaria;Lophiiformes;Chaunacoidei;Chaunacidae;Chaunax;Chaunax penicillatus	√	√	√	√	√	√	√	√	×	√	×	×
	Chaunax pictus	NC_013883.1	Vertebrata;Gnathostomata;Teleostomi;Euteleostomi;Actinopterygii;Actinopteri;Neopterygii;Teleostei;Osteoglossocephalai;Clupeocephala;Euteleosteomorpha;Neoteleostei;Eurypterygia;Ctenosquamata;Acanthomorphata;Euacanthomorphacea;Percomorphaceae;Eupercaria;Lophiiformes;Chaunacoidei;Chaunacidae;Chaunax;Chaunax pictus	√	√	√	√	√	√	√	√	×	√	×	×
	Cheilinus fasciatus	NC_037707.1	Vertebrata;Gnathostomata;Teleostomi;Euteleostomi;Actinopterygii;Actinopteri;Neopterygii;Teleostei;Osteoglossocephalai;Clupeocephala;Euteleosteomorpha;Neoteleostei;Eurypterygia;Ctenosquamata;Acanthomorphata;Euacanthomorphacea;Percomorphaceae;Eupercaria;Labriformes;Labridae;Cheilinus;Cheilinus fasciatus	√	√	√	√	×	√	√	√	×	×	×	×
	Cheilinus undulatus	MH688052.1	Vertebrata;Gnathostomata;Teleostomi;Euteleostomi;Actinopterygii;Actinopteri;Neopterygii;Teleostei;Osteoglossocephalai;Clupeocephala;Euteleosteomorpha;Neoteleostei;Eurypterygia;Ctenosquamata;Acanthomorphata;Euacanthomorphacea;Percomorphaceae;Eupercaria;Labriformes;Labridae;Cheilinus;Cheilinus undulatus	√	√	√	√	√	√	√	√	×	√	×	×
	Cheilochromis euchilus	NC_020672.1	Vertebrata;Gnathostomata;Teleostomi;Euteleostomi;Actinopterygii;Actinopteri;Neopterygii;Teleostei;Osteoglossocephalai;Clupeocephala;Euteleosteomorpha;Neoteleostei;Eurypterygia;Ctenosquamata;Acanthomorphata;Euacanthomorphacea;Percomorphaceae;Ovalentaria;Cichlomorphae;Cichliformes;Cichlidae;African cichlids;Pseudocrenilabrinae;Haplochromini;Cheilochromis;Cheilochromis euchilus	√	√	√	√	√	√	√	√	×	√	√	×
	Cheilodactylus quadricornis	NC_028180.1	Vertebrata;Gnathostomata;Teleostomi;Euteleostomi;Actinopterygii;Actinopteri;Neopterygii;Teleostei;Osteoglossocephalai;Clupeocephala;Euteleosteomorpha;Neoteleostei;Eurypterygia;Ctenosquamata;Acanthomorphata;Euacanthomorphacea;Percomorphaceae;Eupercaria;Centrarchiformes;Cirrhitioidei;Cheilodactylidae;Cheilodactylus;Cheilodactylus quadricornis	√	√	√	√	√	√	√	√	×	√	×	×
	Cheilodactylus variegatus	NC_026899.1	Vertebrata;Gnathostomata;Teleostomi;Euteleostomi;Actinopterygii;Actinopteri;Neopterygii;Teleostei;Osteoglossocephalai;Clupeocephala;Euteleosteomorpha;Neoteleostei;Eurypterygia;Ctenosquamata;Acanthomorphata;Euacanthomorphacea;Percomorphaceae;Eupercaria;Centrarchiformes;Cirrhitioidei;Cheilodactylidae;Cheilodactylus;Cheilodactylus variegatus	√	√	√	√	√	√	√	√	×	√	×	×
	Cheilodipterus quinquelineatus	NC_040863.1	Vertebrata;Gnathostomata;Teleostomi;Euteleostomi;Actinopterygii;Actinopteri;Neopterygii;Teleostei;Osteoglossocephalai;Clupeocephala;Euteleosteomorpha;Neoteleostei;Eurypterygia;Ctenosquamata;Acanthomorphata;Euacanthomorphacea;Percomorphaceae;Gobiaria;Kurtiformes;Apogonoidei;Apogonidae;Apogoninae;Cheilodipterus;Cheilodipterus quinquelineatus	√	√	√	√	√	√	√	√	×	√	√	×
	Cheilopogon agoo	NC_036720.1	Vertebrata;Gnathostomata;Teleostomi;Euteleostomi;Actinopterygii;Actinopteri;Neopterygii;Teleostei;Osteoglossocephalai;Clupeocephala;Euteleosteomorpha;Neoteleostei;Eurypterygia;Ctenosquamata;Acanthomorphata;Euacanthomorphacea;Percomorphaceae;Ovalentaria;Atherinomorphae;Beloniformes;Belonoidei;Exocoetidae;Cheilopogon;Cheilopogon agoo	√	√	√	√	√	√	√	√	×	√	√	×
	Cheilopogon arcticeps	NC_029729.1	Vertebrata;Gnathostomata;Teleostomi;Euteleostomi;Actinopterygii;Actinopteri;Neopterygii;Teleostei;Osteoglossocephalai;Clupeocephala;Euteleosteomorpha;Neoteleostei;Eurypterygia;Ctenosquamata;Acanthomorphata;Euacanthomorphacea;Percomorphaceae;Ovalentaria;Atherinomorphae;Beloniformes;Belonoidei;Exocoetidae;Cheilopogon;Cheilopogon arcticeps	√	√	√	√	√	√	√	√	×	√	√	×
	Cheilopogon atrisignis	NC_029730.1	Vertebrata;Gnathostomata;Teleostomi;Euteleostomi;Actinopterygii;Actinopteri;Neopterygii;Teleostei;Osteoglossocephalai;Clupeocephala;Euteleosteomorpha;Neoteleostei;Eurypterygia;Ctenosquamata;Acanthomorphata;Euacanthomorphacea;Percomorphaceae;Ovalentaria;Atherinomorphae;Beloniformes;Belonoidei;Exocoetidae;Cheilopogon;Cheilopogon atrisignis	√	√	√	√	√	√	√	√	×	√	√	×
	Cheilopogon cyanopterus	NC_036721.1	Vertebrata;Gnathostomata;Teleostomi;Euteleostomi;Actinopterygii;Actinopteri;Neopterygii;Teleostei;Osteoglossocephalai;Clupeocephala;Euteleosteomorpha;Neoteleostei;Eurypterygia;Ctenosquamata;Acanthomorphata;Euacanthomorphacea;Percomorphaceae;Ovalentaria;Atherinomorphae;Beloniformes;Belonoidei;Exocoetidae;Cheilopogon;Cheilopogon cyanopterus	√	√	√	√	√	√	√	√	×	√	√	×
	Cheilopogon pinnatibarbatus	NC_039356.1	Vertebrata;Gnathostomata;Teleostomi;Euteleostomi;Actinopterygii;Actinopteri;Neopterygii;Teleostei;Osteoglossocephalai;Clupeocephala;Euteleosteomorpha;Neoteleostei;Eurypterygia;Ctenosquamata;Acanthomorphata;Euacanthomorphacea;Percomorphaceae;Ovalentaria;Atherinomorphae;Beloniformes;Belonoidei;Exocoetidae;Cheilopogon;Cheilopogon pinnatibarbatus	√	√	√	√	√	√	√	√	×	√	×	×
	Cheilopogon spilonotopterus	NC_039400.1	Vertebrata;Gnathostomata;Teleostomi;Euteleostomi;Actinopterygii;Actinopteri;Neopterygii;Teleostei;Osteoglossocephalai;Clupeocephala;Euteleosteomorpha;Neoteleostei;Eurypterygia;Ctenosquamata;Acanthomorphata;Euacanthomorphacea;Percomorphaceae;Ovalentaria;Atherinomorphae;Beloniformes;Belonoidei;Exocoetidae;Cheilopogon;Cheilopogon spilonotopterus	√	√	√	√	√	√	√	√	×	√	√	×
	Cheilopogon unicolor	NC_029728.1	Vertebrata;Gnathostomata;Teleostomi;Euteleostomi;Actinopterygii;Actinopteri;Neopterygii;Teleostei;Osteoglossocephalai;Clupeocephala;Euteleosteomorpha;Neoteleostei;Eurypterygia;Ctenosquamata;Acanthomorphata;Euacanthomorphacea;Percomorphaceae;Ovalentaria;Atherinomorphae;Beloniformes;Belonoidei;Exocoetidae;Cheilopogon;Cheilopogon unicolor	√	√	√	√	√	√	√	√	×	√	√	×
	Chelidonichthys kumu	NC_035059.1	Vertebrata;Gnathostomata;Teleostomi;Euteleostomi;Actinopterygii;Actinopteri;Neopterygii;Teleostei;Osteoglossocephalai;Clupeocephala;Euteleosteomorpha;Neoteleostei;Eurypterygia;Ctenosquamata;Acanthomorphata;Euacanthomorphacea;Percomorphaceae;Eupercaria;Perciformes;Triglioidei;Triglidae;Chelidonichthys;Chelidonichthys kumu	√	√	√	√	√	√	√	√	×	×	√	×
	Chelmon rostratus	NC_025953.1	Vertebrata;Gnathostomata;Teleostomi;Euteleostomi;Actinopterygii;Actinopteri;Neopterygii;Teleostei;Osteoglossocephalai;Clupeocephala;Euteleosteomorpha;Neoteleostei;Eurypterygia;Ctenosquamata;Acanthomorphata;Euacanthomorphacea;Percomorphaceae;Eupercaria;Chaetodontiformes;Chaetodontidae;Chelmon;Chelmon rostratus	√	√	√	√	√	√	√	√	×	√	√	×
	Chelon labrosus	JF911706.1	Vertebrata;Gnathostomata;Teleostomi;Euteleostomi;Actinopterygii;Actinopteri;Neopterygii;Teleostei;Osteoglossocephalai;Clupeocephala;Euteleosteomorpha;Neoteleostei;Eurypterygia;Ctenosquamata;Acanthomorphata;Euacanthomorphacea;Percomorphaceae;Ovalentaria;Mugilomorphae;Mugiliformes;Mugilidae;Chelon;Chelon labrosus	√	√	√	√	√	√	√	√	×	√	√	×
	Chelonodontops patoca	AP009541.1	Vertebrata;Gnathostomata;Teleostomi;Euteleostomi;Actinopterygii;Actinopteri;Neopterygii;Teleostei;Osteoglossocephalai;Clupeocephala;Euteleosteomorpha;Neoteleostei;Eurypterygia;Ctenosquamata;Acanthomorphata;Euacanthomorphacea;Percomorphaceae;Eupercaria;Tetraodontiformes;Tetraodontoidei;Tetradontoidea;Tetraodontidae;Chelonodontops;Chelonodontops patoca	√	√	√	√	√	√	√	√	×	√	×	×
	Chelonodontops pleurospilus	NC_015369.1	Vertebrata;Gnathostomata;Teleostomi;Euteleostomi;Actinopterygii;Actinopteri;Neopterygii;Teleostei;Osteoglossocephalai;Clupeocephala;Euteleosteomorpha;Neoteleostei;Eurypterygia;Ctenosquamata;Acanthomorphata;Euacanthomorphacea;Percomorphaceae;Eupercaria;Tetraodontiformes;Tetraodontoidei;Tetradontoidea;Tetraodontidae;Chelonodontops;Chelonodontops pleurospilus	√	√	√	√	√	√	√	√	×	√	√	×
	Chilodus punctatus	NC_015801.1	Vertebrata;Gnathostomata;Teleostomi;Euteleostomi;Actinopterygii;Actinopteri;Neopterygii;Teleostei;Osteoglossocephalai;Clupeocephala;Otomorpha;Ostariophysi;Otophysi;Characiphysae;Characiformes;Characoidei;Chilodontidae;Chilodus;Chilodus punctatus	√	√	√	√	√	√	√	√	√	√	√	×
	Chilomycterus reticulatus	NC_011331.1	Vertebrata;Gnathostomata;Teleostomi;Euteleostomi;Actinopterygii;Actinopteri;Neopterygii;Teleostei;Osteoglossocephalai;Clupeocephala;Euteleosteomorpha;Neoteleostei;Eurypterygia;Ctenosquamata;Acanthomorphata;Euacanthomorphacea;Percomorphaceae;Eupercaria;Tetraodontiformes;Tetraodontoidei;Diodontidae;Chilomycterus;Chilomycterus reticulatus	√	√	√	√	√	√	√	√	×	√	√	×
	Chilotilapia rhoadesii	NC_035992.1	Vertebrata;Gnathostomata;Teleostomi;Euteleostomi;Actinopterygii;Actinopteri;Neopterygii;Teleostei;Osteoglossocephalai;Clupeocephala;Euteleosteomorpha;Neoteleostei;Eurypterygia;Ctenosquamata;Acanthomorphata;Euacanthomorphacea;Percomorphaceae;Ovalentaria;Cichlomorphae;Cichliformes;Cichlidae;African cichlids;Pseudocrenilabrinae;Haplochromini;Chilotilapia;Chilotilapia rhoadesii	√	√	√	√	√	√	√	√	×	√	√	×
	Chionobathyscus dewitti	NC_046762.1	Vertebrata;Gnathostomata;Teleostomi;Euteleostomi;Actinopterygii;Actinopteri;Neopterygii;Teleostei;Osteoglossocephalai;Clupeocephala;Euteleosteomorpha;Neoteleostei;Eurypterygia;Ctenosquamata;Acanthomorphata;Euacanthomorphacea;Percomorphaceae;Eupercaria;Perciformes;Notothenioidei;Channichthyidae;Chionobathyscus;Chionobathyscus dewitti	√	√	√	√	√	√	√	√	×	√	√	×
	Chionodraco hamatus	NC_029737.1	Vertebrata;Gnathostomata;Teleostomi;Euteleostomi;Actinopterygii;Actinopteri;Neopterygii;Teleostei;Osteoglossocephalai;Clupeocephala;Euteleosteomorpha;Neoteleostei;Eurypterygia;Ctenosquamata;Acanthomorphata;Euacanthomorphacea;Percomorphaceae;Eupercaria;Perciformes;Notothenioidei;Channichthyidae;Chionodraco;Chionodraco hamatus	√	√	√	√	√	√	√	√	×	√	×	×
	Chionodraco myersi	NC_010689.1	Vertebrata;Gnathostomata;Teleostomi;Euteleostomi;Actinopterygii;Actinopteri;Neopterygii;Teleostei;Osteoglossocephalai;Clupeocephala;Euteleosteomorpha;Neoteleostei;Eurypterygia;Ctenosquamata;Acanthomorphata;Euacanthomorphacea;Percomorphaceae;Eupercaria;Perciformes;Notothenioidei;Channichthyidae;Chionodraco;Chionodraco myersi	√	√	√	√	√	√	√	√	×	√	√	×
	Chionodraco rastrospinosus	NC_039543.1	Vertebrata;Gnathostomata;Teleostomi;Euteleostomi;Actinopterygii;Actinopteri;Neopterygii;Teleostei;Osteoglossocephalai;Clupeocephala;Euteleosteomorpha;Neoteleostei;Eurypterygia;Ctenosquamata;Acanthomorphata;Euacanthomorphacea;Percomorphaceae;Eupercaria;Perciformes;Notothenioidei;Channichthyidae;Chionodraco;Chionodraco rastrospinosus	√	√	√	√	√	√	√	√	×	√	×	×
	Chirocentrus dorab	AP006229.1	Vertebrata;Gnathostomata;Teleostomi;Euteleostomi;Actinopterygii;Actinopteri;Neopterygii;Teleostei;Osteoglossocephalai;Clupeocephala;Otomorpha;Clupei;Clupeiformes;Clupeoidei;Chirocentridae;Chirocentrus;Chirocentrus dorab	√	√	√	√	√	√	√	√	×	√	×	×
	Chirolophis ascanii	MT410928.1	Vertebrata;Gnathostomata;Teleostomi;Euteleostomi;Actinopterygii;Actinopteri;Neopterygii;Teleostei;Osteoglossocephalai;Clupeocephala;Euteleosteomorpha;Neoteleostei;Eurypterygia;Ctenosquamata;Acanthomorphata;Euacanthomorphacea;Percomorphaceae;Eupercaria;Perciformes;Cottioidei;Zoarcales;Stichaeidae;Chirolophinae;Chirolophis;Chirolophis ascanii	√	√	√	√	√	√	√	√	×	√	√	×
	Chirolophis japonicus	NC_028022.1	Vertebrata;Gnathostomata;Teleostomi;Euteleostomi;Actinopterygii;Actinopteri;Neopterygii;Teleostei;Osteoglossocephalai;Clupeocephala;Euteleosteomorpha;Neoteleostei;Eurypterygia;Ctenosquamata;Acanthomorphata;Euacanthomorphacea;Percomorphaceae;Eupercaria;Perciformes;Cottioidei;Zoarcales;Stichaeidae;Chirolophinae;Chirolophis;Chirolophis japonicus	√	√	√	√	√	√	√	√	×	√	√	×
	Chirostoma humboldtianum	NC_024883.1	Vertebrata;Gnathostomata;Teleostomi;Euteleostomi;Actinopterygii;Actinopteri;Neopterygii;Teleostei;Osteoglossocephalai;Clupeocephala;Euteleosteomorpha;Neoteleostei;Eurypterygia;Ctenosquamata;Acanthomorphata;Euacanthomorphacea;Percomorphaceae;Ovalentaria;Atherinomorphae;Atheriniformes;Atherinopsidae;Menidiinae;Chirostoma;Chirostoma humboldtianum	√	√	√	√	√	√	√	√	×	√	√	×
	Chitala blanci	NC_012710.1	Vertebrata;Gnathostomata;Teleostomi;Euteleostomi;Actinopterygii;Actinopteri;Neopterygii;Teleostei;Osteoglossocephalai;Osteoglossocephala;Osteoglossomorpha;Osteoglossiformes;Notopteridae;Chitala;Chitala blanci	√	√	√	√	√	√	√	√	√	√	√	×
	Chitala chitala	KX894524.1	Vertebrata;Gnathostomata;Teleostomi;Euteleostomi;Actinopterygii;Actinopteri;Neopterygii;Teleostei;Osteoglossocephalai;Osteoglossocephala;Osteoglossomorpha;Osteoglossiformes;Notopteridae;Chitala;Chitala chitala	√	√	√	√	√	√	√	√	√	√	√	×
	Chitala lopis	NC_012711.1	Vertebrata;Gnathostomata;Teleostomi;Euteleostomi;Actinopterygii;Actinopteri;Neopterygii;Teleostei;Osteoglossocephalai;Osteoglossocephala;Osteoglossomorpha;Osteoglossiformes;Notopteridae;Chitala;Chitala lopis	√	√	√	√	√	√	√	×	√	√	√	×
	Chitala ornata	NC_012712.1	Vertebrata;Gnathostomata;Teleostomi;Euteleostomi;Actinopterygii;Actinopteri;Neopterygii;Teleostei;Osteoglossocephalai;Osteoglossocephala;Osteoglossomorpha;Osteoglossiformes;Notopteridae;Chitala;Chitala ornata	√	√	√	√	√	√	√	√	√	√	√	×
	Chlorophthalmus agassizi	NC_003160.1	Vertebrata;Gnathostomata;Teleostomi;Euteleostomi;Actinopterygii;Actinopteri;Neopterygii;Teleostei;Osteoglossocephalai;Clupeocephala;Euteleosteomorpha;Neoteleostei;Eurypterygia;Aulopa;Aulopiformes;Alepisauroidei;Chlorophthalmidae;Chlorophthalmus;Chlorophthalmus agassizi	√	√	√	√	√	√	√	√	×	√	√	×
	Chlorophthalmus nigromarginatus	NC_027654.1	Vertebrata;Gnathostomata;Teleostomi;Euteleostomi;Actinopterygii;Actinopteri;Neopterygii;Teleostei;Osteoglossocephalai;Clupeocephala;Euteleosteomorpha;Neoteleostei;Eurypterygia;Aulopa;Aulopiformes;Alepisauroidei;Chlorophthalmidae;Chlorophthalmus;Chlorophthalmus nigromarginatus	√	√	√	√	√	√	√	√	×	√	√	×
	Chlorurus sordidus	NC_006355.1	Vertebrata;Gnathostomata;Teleostomi;Euteleostomi;Actinopterygii;Actinopteri;Neopterygii;Teleostei;Osteoglossocephalai;Clupeocephala;Euteleosteomorpha;Neoteleostei;Eurypterygia;Ctenosquamata;Acanthomorphata;Euacanthomorphacea;Percomorphaceae;Eupercaria;Labriformes;Labridae;Chlorurus;Chlorurus sordidus	√	√	√	√	√	√	√	√	×	√	√	×
	Choerodon schoenleinii	MG739435.1	Vertebrata;Gnathostomata;Teleostomi;Euteleostomi;Actinopterygii;Actinopteri;Neopterygii;Teleostei;Osteoglossocephalai;Clupeocephala;Euteleosteomorpha;Neoteleostei;Eurypterygia;Ctenosquamata;Acanthomorphata;Euacanthomorphacea;Percomorphaceae;Eupercaria;Labriformes;Labridae;Choerodon;Choerodon schoenleinii	√	√	√	√	√	√	√	√	×	√	√	×
	Chromis notata	MT800513.1	Vertebrata;Gnathostomata;Teleostomi;Euteleostomi;Actinopterygii;Actinopteri;Neopterygii;Teleostei;Osteoglossocephalai;Clupeocephala;Euteleosteomorpha;Neoteleostei;Eurypterygia;Ctenosquamata;Acanthomorphata;Euacanthomorphacea;Percomorphaceae;Ovalentaria;Ovalentaria incertae sedis;Pomacentridae;Chromis;Chromis notata	√	√	√	√	√	√	√	√	×	√	√	×
	Chromis viridis	MT199208.1	Vertebrata;Gnathostomata;Teleostomi;Euteleostomi;Actinopterygii;Actinopteri;Neopterygii;Teleostei;Osteoglossocephalai;Clupeocephala;Euteleosteomorpha;Neoteleostei;Eurypterygia;Ctenosquamata;Acanthomorphata;Euacanthomorphacea;Percomorphaceae;Ovalentaria;Ovalentaria incertae sedis;Pomacentridae;Chromis;Chromis viridis	√	√	√	√	√	√	√	√	×	√	√	×
	Chromobotia macracanthus	NC_008671.1	Vertebrata;Gnathostomata;Teleostomi;Euteleostomi;Actinopterygii;Actinopteri;Neopterygii;Teleostei;Osteoglossocephalai;Clupeocephala;Otomorpha;Ostariophysi;Otophysi;Cypriniphysae;Cypriniformes;Cobitoidei;Botiidae;Chromobotia;Chromobotia macracanthus	√	√	√	√	√	√	√	√	√	√	√	×
	Chrosomus eos	NC_015364.1	Vertebrata;Gnathostomata;Teleostomi;Euteleostomi;Actinopterygii;Actinopteri;Neopterygii;Teleostei;Osteoglossocephalai;Clupeocephala;Otomorpha;Ostariophysi;Otophysi;Cypriniphysae;Cypriniformes;Cyprinoidei;Leuciscidae;Laviniinae;Chrosomus;Chrosomus eos	√	√	√	√	√	√	√	√	√	√	√	×
	Chrysichthys nigrodigitatus	NC_042721.1	Vertebrata;Gnathostomata;Teleostomi;Euteleostomi;Actinopterygii;Actinopteri;Neopterygii;Teleostei;Osteoglossocephalai;Clupeocephala;Otomorpha;Ostariophysi;Otophysi;Characiphysae;Siluriformes;Siluroidei;Claroteidae;Chrysichthys;Chrysichthys nigrodigitatus	√	√	√	√	√	√	√	√	√	√	√	×
	Chrysichthys sp. NM-2010	AP012009.1	Vertebrata;Gnathostomata;Teleostomi;Euteleostomi;Actinopterygii;Actinopteri;Neopterygii;Teleostei;Osteoglossocephalai;Clupeocephala;Otomorpha;Ostariophysi;Otophysi;Characiphysae;Siluriformes;Siluroidei;Claroteidae;Chrysichthys;unclassified Chrysichthys;Chrysichthys sp. NM-2010	√	√	√	√	√	√	√	√	√	√	√	×
	Chrysiptera biocellata	NC_040304.1	Vertebrata;Gnathostomata;Teleostomi;Euteleostomi;Actinopterygii;Actinopteri;Neopterygii;Teleostei;Osteoglossocephalai;Clupeocephala;Euteleosteomorpha;Neoteleostei;Eurypterygia;Ctenosquamata;Acanthomorphata;Euacanthomorphacea;Percomorphaceae;Ovalentaria;Ovalentaria incertae sedis;Pomacentridae;Chrysiptera;Chrysiptera biocellata	√	√	√	√	√	√	√	√	×	√	×	×
	Chrysochir aureus	MW026682.1	Vertebrata;Gnathostomata;Teleostomi;Euteleostomi;Actinopterygii;Actinopteri;Neopterygii;Teleostei;Osteoglossocephalai;Clupeocephala;Euteleosteomorpha;Neoteleostei;Eurypterygia;Ctenosquamata;Acanthomorphata;Euacanthomorphacea;Percomorphaceae;Eupercaria;Eupercaria incertae sedis;Sciaenidae;Chrysochir;Chrysochir aureus	√	√	√	√	×	√	√	√	×	√	√	×
	Chuanchia labiosa	NC_029181.1	Vertebrata;Gnathostomata;Teleostomi;Euteleostomi;Actinopterygii;Actinopteri;Neopterygii;Teleostei;Osteoglossocephalai;Clupeocephala;Otomorpha;Ostariophysi;Otophysi;Cypriniphysae;Cypriniformes;Cyprinoidei;Cyprinidae;Schizopygopsinae;Chuanchia;Chuanchia labiosa	√	√	√	√	√	√	√	√	√	√	√	×
	Cichla ocellaris	KR150863.1	Vertebrata;Gnathostomata;Teleostomi;Euteleostomi;Actinopterygii;Actinopteri;Neopterygii;Teleostei;Osteoglossocephalai;Clupeocephala;Euteleosteomorpha;Neoteleostei;Eurypterygia;Ctenosquamata;Acanthomorphata;Euacanthomorphacea;Percomorphaceae;Ovalentaria;Cichlomorphae;Cichliformes;Cichlidae;New World cichlids;Cichlinae;Cichlini;Cichla;Cichla ocellaris	√	√	√	√	√	√	√	√	×	√	×	×
	Cichlasoma dimerus	NC_033551.1	Vertebrata;Gnathostomata;Teleostomi;Euteleostomi;Actinopterygii;Actinopteri;Neopterygii;Teleostei;Osteoglossocephalai;Clupeocephala;Euteleosteomorpha;Neoteleostei;Eurypterygia;Ctenosquamata;Acanthomorphata;Euacanthomorphacea;Percomorphaceae;Ovalentaria;Cichlomorphae;Cichliformes;Cichlidae;New World cichlids;Cichlasomatinae;Cichlasomatini;Cichlasoma;Cichlasoma dimerus	√	√	√	√	√	√	√	√	×	√	√	×
	Cirrhinus cirrhosus	NC_033964.1	Vertebrata;Gnathostomata;Teleostomi;Euteleostomi;Actinopterygii;Actinopteri;Neopterygii;Teleostei;Osteoglossocephalai;Clupeocephala;Otomorpha;Ostariophysi;Otophysi;Cypriniphysae;Cypriniformes;Cyprinoidei;Cyprinidae;Labeoninae;Labeonini;Cirrhinus;Cirrhinus cirrhosus	√	√	√	√	√	√	√	√	√	√	√	×
	Cirrhinus molitorella	NC_022182.1	Vertebrata;Gnathostomata;Teleostomi;Euteleostomi;Actinopterygii;Actinopteri;Neopterygii;Teleostei;Osteoglossocephalai;Clupeocephala;Otomorpha;Ostariophysi;Otophysi;Cypriniphysae;Cypriniformes;Cyprinoidei;Cyprinidae;Labeoninae;Labeonini;Cirrhinus;Cirrhinus molitorella	√	√	√	√	√	√	√	√	√	√	√	×
	Cirrhinus mrigala	JQ838173.1	Vertebrata;Gnathostomata;Teleostomi;Euteleostomi;Actinopterygii;Actinopteri;Neopterygii;Teleostei;Osteoglossocephalai;Clupeocephala;Otomorpha;Ostariophysi;Otophysi;Cypriniphysae;Cypriniformes;Cyprinoidei;Cyprinidae;Labeoninae;Labeonini;Cirrhinus;Cirrhinus mrigala	√	√	√	√	√	√	√	√	√	√	√	×
	Cirrhinus mrigala x Labeo rohita	NC_025930.1	Vertebrata;Gnathostomata;Teleostomi;Euteleostomi;Actinopterygii;Actinopteri;Neopterygii;Teleostei;Osteoglossocephalai;Clupeocephala;Otomorpha;Ostariophysi;Otophysi;Cypriniphysae;Cypriniformes;Cyprinoidei;Cyprinoidei intergeneric hybrids;Cirrhinus mrigala x Labeo rohita	√	√	√	√	√	√	√	√	√	√	√	×
	Cirrhinus reba	MN862482.1	Vertebrata;Gnathostomata;Teleostomi;Euteleostomi;Actinopterygii;Actinopteri;Neopterygii;Teleostei;Osteoglossocephalai;Clupeocephala;Otomorpha;Ostariophysi;Otophysi;Cypriniphysae;Cypriniformes;Cyprinoidei;Cyprinidae;Labeoninae;Labeonini;Cirrhinus;Cirrhinus reba	√	√	√	√	√	√	√	√	√	√	×	×
	Citharinus congicus	NC_015805.1	Vertebrata;Gnathostomata;Teleostomi;Euteleostomi;Actinopterygii;Actinopteri;Neopterygii;Teleostei;Osteoglossocephalai;Clupeocephala;Otomorpha;Ostariophysi;Otophysi;Characiphysae;Characiformes;Citharinoidei;Citharinidae;Citharininae;Citharinus;Citharinus congicus	√	√	√	√	√	√	√	√	√	√	√	×
	Citharoides macrolepis	KJ433560.1	Vertebrata;Gnathostomata;Teleostomi;Euteleostomi;Actinopterygii;Actinopteri;Neopterygii;Teleostei;Osteoglossocephalai;Clupeocephala;Euteleosteomorpha;Neoteleostei;Eurypterygia;Ctenosquamata;Acanthomorphata;Euacanthomorphacea;Percomorphaceae;Carangaria;Pleuronectiformes;Pleuronectoidei;Citharidae;Citharoides;Citharoides macrolepis	√	√	√	√	×	√	√	√	√	√	√	×
	Claea dabryi	NC_029242.1	Vertebrata;Gnathostomata;Teleostomi;Euteleostomi;Actinopterygii;Actinopteri;Neopterygii;Teleostei;Osteoglossocephalai;Clupeocephala;Otomorpha;Ostariophysi;Otophysi;Cypriniphysae;Cypriniformes;Cobitoidei;Nemacheilidae;Claea;Claea dabryi	√	√	√	√	√	√	√	√	√	√	√	×
	Clarias batrachus	KY767672.1	Vertebrata;Gnathostomata;Teleostomi;Euteleostomi;Actinopterygii;Actinopteri;Neopterygii;Teleostei;Osteoglossocephalai;Clupeocephala;Otomorpha;Ostariophysi;Otophysi;Characiphysae;Siluriformes;Siluroidei;Clariidae;Clarias;Clarias batrachus	√	√	√	√	√	√	√	√	√	√	√	×
	Clarias dussumieri	NC_037193.1	Vertebrata;Gnathostomata;Teleostomi;Euteleostomi;Actinopterygii;Actinopteri;Neopterygii;Teleostei;Osteoglossocephalai;Clupeocephala;Otomorpha;Ostariophysi;Otophysi;Characiphysae;Siluriformes;Siluroidei;Clariidae;Clarias;Clarias dussumieri	√	√	√	√	√	√	√	√	√	√	√	×
	Clarias fuscus	KM029965.1	Vertebrata;Gnathostomata;Teleostomi;Euteleostomi;Actinopterygii;Actinopteri;Neopterygii;Teleostei;Osteoglossocephalai;Clupeocephala;Otomorpha;Ostariophysi;Otophysi;Characiphysae;Siluriformes;Siluroidei;Clariidae;Clarias;Clarias fuscus	√	√	√	√	√	√	√	√	√	√	√	×
	Clarias gariepinus	KT809508.1	Vertebrata;Gnathostomata;Teleostomi;Euteleostomi;Actinopterygii;Actinopteri;Neopterygii;Teleostei;Osteoglossocephalai;Clupeocephala;Otomorpha;Ostariophysi;Otophysi;Characiphysae;Siluriformes;Siluroidei;Clariidae;Clarias;Clarias gariepinus	√	√	√	√	√	√	√	√	√	√	√	×
	Clarias macrocephalus	NC_046749.1	Vertebrata;Gnathostomata;Teleostomi;Euteleostomi;Actinopterygii;Actinopteri;Neopterygii;Teleostei;Osteoglossocephalai;Clupeocephala;Otomorpha;Ostariophysi;Otophysi;Characiphysae;Siluriformes;Siluroidei;Clariidae;Clarias;Clarias macrocephalus	√	√	√	√	√	√	√	√	√	√	√	×
	Clarias sp. NM-2010	NC_015749.1	Vertebrata;Gnathostomata;Teleostomi;Euteleostomi;Actinopterygii;Actinopteri;Neopterygii;Teleostei;Osteoglossocephalai;Clupeocephala;Otomorpha;Ostariophysi;Otophysi;Characiphysae;Siluriformes;Siluroidei;Clariidae;Clarias;unclassified Clarias;Clarias sp. NM-2010	√	√	√	√	√	√	√	√	√	√	√	×
	Cleisthenes herzensteini	NC_028021.1	Vertebrata;Gnathostomata;Teleostomi;Euteleostomi;Actinopterygii;Actinopteri;Neopterygii;Teleostei;Osteoglossocephalai;Clupeocephala;Euteleosteomorpha;Neoteleostei;Eurypterygia;Ctenosquamata;Acanthomorphata;Euacanthomorphacea;Percomorphaceae;Carangaria;Pleuronectiformes;Pleuronectoidei;Pleuronectidae;Cleisthenes;Cleisthenes herzensteini	√	√	√	√	√	√	√	√	×	√	√	×
	Clidoderma asperrimum	MK210570.1	Vertebrata;Gnathostomata;Teleostomi;Euteleostomi;Actinopterygii;Actinopteri;Neopterygii;Teleostei;Osteoglossocephalai;Clupeocephala;Euteleosteomorpha;Neoteleostei;Eurypterygia;Ctenosquamata;Acanthomorphata;Euacanthomorphacea;Percomorphaceae;Carangaria;Pleuronectiformes;Pleuronectoidei;Pleuronectidae;Clidoderma;Clidoderma asperrimum	√	√	√	√	√	√	√	√	×	√	√	×
	Clinocottus analis	FJ848374.1	Vertebrata;Gnathostomata;Teleostomi;Euteleostomi;Actinopterygii;Actinopteri;Neopterygii;Teleostei;Osteoglossocephalai;Clupeocephala;Euteleosteomorpha;Neoteleostei;Eurypterygia;Ctenosquamata;Acanthomorphata;Euacanthomorphacea;Percomorphaceae;Eupercaria;Perciformes;Cottioidei;Cottales;Cottidae;Clinocottus;Clinocottus analis	√	√	√	√	√	√	√	√	×	√	×	×
	Clupanodon thrissa	NC_018600.1	Vertebrata;Gnathostomata;Teleostomi;Euteleostomi;Actinopterygii;Actinopteri;Neopterygii;Teleostei;Osteoglossocephalai;Clupeocephala;Otomorpha;Clupei;Clupeiformes;Clupeoidei;Clupeidae;Dorosomatinae;Clupanodon;Clupanodon thrissa	√	√	√	√	√	√	√	√	×	√	√	×
	Clupea harengus	MN122931.1	Vertebrata;Gnathostomata;Teleostomi;Euteleostomi;Actinopterygii;Actinopteri;Neopterygii;Teleostei;Osteoglossocephalai;Clupeocephala;Otomorpha;Clupei;Clupeiformes;Clupeoidei;Clupeidae;Clupeinae;Clupea;Clupea harengus	√	√	√	√	√	√	√	√	×	√	×	×
	Clupea pallasii	NC_009578.1	Vertebrata;Gnathostomata;Teleostomi;Euteleostomi;Actinopterygii;Actinopteri;Neopterygii;Teleostei;Osteoglossocephalai;Clupeocephala;Otomorpha;Clupei;Clupeiformes;Clupeoidei;Clupeidae;Clupeinae;Clupea;Clupea pallasii	√	√	√	√	√	√	√	√	×	√	√	×
	Clupeonella cultriventris	NC_015109.1	Vertebrata;Gnathostomata;Teleostomi;Euteleostomi;Actinopterygii;Actinopteri;Neopterygii;Teleostei;Osteoglossocephalai;Clupeocephala;Otomorpha;Clupei;Clupeiformes;Clupeoidei;Clupeidae;Clupeinae;Clupeonella;Clupeonella cultriventris	√	√	√	√	√	√	√	√	×	√	√	×
	Cobitis biwae	NC_027663.1	Vertebrata;Gnathostomata;Teleostomi;Euteleostomi;Actinopterygii;Actinopteri;Neopterygii;Teleostei;Osteoglossocephalai;Clupeocephala;Otomorpha;Ostariophysi;Otophysi;Cypriniphysae;Cypriniformes;Cobitoidei;Cobitidae;Cobitinae;Cobitis;Cobitis biwae	√	√	√	√	√	√	√	√	√	√	√	×
	Cobitis choii	EU656112.2	Vertebrata;Gnathostomata;Teleostomi;Euteleostomi;Actinopterygii;Actinopteri;Neopterygii;Teleostei;Osteoglossocephalai;Clupeocephala;Otomorpha;Ostariophysi;Otophysi;Cypriniphysae;Cypriniformes;Cobitoidei;Cobitidae;Cobitinae;Cobitis;Cobitis choii	√	√	√	√	√	√	√	√	√	√	√	×
	Cobitis elongatoides	NC_023947.1	Vertebrata;Gnathostomata;Teleostomi;Euteleostomi;Actinopterygii;Actinopteri;Neopterygii;Teleostei;Osteoglossocephalai;Clupeocephala;Otomorpha;Ostariophysi;Otophysi;Cypriniphysae;Cypriniformes;Cobitoidei;Cobitidae;Cobitinae;Cobitis;Cobitis elongatoides	√	√	√	√	√	√	√	√	√	√	×	×
	Cobitis hankugensis	MN841275.1	Vertebrata;Gnathostomata;Teleostomi;Euteleostomi;Actinopterygii;Actinopteri;Neopterygii;Teleostei;Osteoglossocephalai;Clupeocephala;Otomorpha;Ostariophysi;Otophysi;Cypriniphysae;Cypriniformes;Cobitoidei;Cobitidae;Cobitinae;Cobitis;Cobitis hankugensis	√	√	√	√	√	√	√	√	√	√	√	×
	Cobitis hugowolfeldi	MN756662.1	Vertebrata;Gnathostomata;Teleostomi;Euteleostomi;Actinopterygii;Actinopteri;Neopterygii;Teleostei;Osteoglossocephalai;Clupeocephala;Otomorpha;Ostariophysi;Otophysi;Cypriniphysae;Cypriniformes;Cobitoidei;Cobitidae;Cobitinae;Cobitis;Cobitis hugowolfeldi	√	√	√	√	√	√	√	√	√	√	√	×
	Cobitis macrostigma	MK156771.1	Vertebrata;Gnathostomata;Teleostomi;Euteleostomi;Actinopterygii;Actinopteri;Neopterygii;Teleostei;Osteoglossocephalai;Clupeocephala;Otomorpha;Ostariophysi;Otophysi;Cypriniphysae;Cypriniformes;Cobitoidei;Cobitidae;Cobitinae;Cobitis;Cobitis macrostigma	√	√	√	√	√	√	√	√	√	√	√	×
	Cobitis matsubarai	NC_029441.1	Vertebrata;Gnathostomata;Teleostomi;Euteleostomi;Actinopterygii;Actinopteri;Neopterygii;Teleostei;Osteoglossocephalai;Clupeocephala;Otomorpha;Ostariophysi;Otophysi;Cypriniphysae;Cypriniformes;Cobitoidei;Cobitidae;Cobitinae;Cobitis;Cobitis matsubarai	√	√	√	√	√	√	√	√	√	√	√	×
	Cobitis melanoleuca granoei	KF908768.1	Vertebrata;Gnathostomata;Teleostomi;Euteleostomi;Actinopterygii;Actinopteri;Neopterygii;Teleostei;Osteoglossocephalai;Clupeocephala;Otomorpha;Ostariophysi;Otophysi;Cypriniphysae;Cypriniformes;Cobitoidei;Cobitidae;Cobitinae;Cobitis;Cobitis melanoleuca;Cobitis melanoleuca granoei	√	√	√	√	√	√	√	√	√	√	√	×
	Cobitis nalbanti	NC_042396.1	Vertebrata;Gnathostomata;Teleostomi;Euteleostomi;Actinopterygii;Actinopteri;Neopterygii;Teleostei;Osteoglossocephalai;Clupeocephala;Otomorpha;Ostariophysi;Otophysi;Cypriniphysae;Cypriniformes;Cobitoidei;Cobitidae;Cobitinae;Cobitis;Cobitis nalbanti	√	√	√	√	√	√	√	√	√	√	√	×
	Cobitis sinensis	AY526868.1	Vertebrata;Gnathostomata;Teleostomi;Euteleostomi;Actinopterygii;Actinopteri;Neopterygii;Teleostei;Osteoglossocephalai;Clupeocephala;Otomorpha;Ostariophysi;Otophysi;Cypriniphysae;Cypriniformes;Cobitoidei;Cobitidae;Cobitinae;Cobitis;Cobitis sinensis	√	√	√	√	√	√	√	√	×	√	×	×
	Cobitis striata	NC_004695.1	Vertebrata;Gnathostomata;Teleostomi;Euteleostomi;Actinopterygii;Actinopteri;Neopterygii;Teleostei;Osteoglossocephalai;Clupeocephala;Otomorpha;Ostariophysi;Otophysi;Cypriniphysae;Cypriniformes;Cobitoidei;Cobitidae;Cobitinae;Cobitis;Cobitis striata	√	√	√	√	√	√	√	√	√	√	√	×
	Cobitis takatsuensis	NC_015306.1	Vertebrata;Gnathostomata;Teleostomi;Euteleostomi;Actinopterygii;Actinopteri;Neopterygii;Teleostei;Osteoglossocephalai;Clupeocephala;Otomorpha;Ostariophysi;Otophysi;Cypriniphysae;Cypriniformes;Cobitoidei;Cobitidae;Cobitinae;Cobitis;Cobitis takatsuensis	√	√	√	√	√	√	√	√	√	√	√	×
	Cociella crocodila	NC_044898.1	Vertebrata;Gnathostomata;Teleostomi;Euteleostomi;Actinopterygii;Actinopteri;Neopterygii;Teleostei;Osteoglossocephalai;Clupeocephala;Euteleosteomorpha;Neoteleostei;Eurypterygia;Ctenosquamata;Acanthomorphata;Euacanthomorphacea;Percomorphaceae;Eupercaria;Perciformes;Platycephaloidei;Platycephalidae;Cociella;Cociella crocodilus	√	√	√	√	√	√	√	√	×	√	√	×
	Coelophrys brevicaudata	NC_013886.1	Vertebrata;Gnathostomata;Teleostomi;Euteleostomi;Actinopterygii;Actinopteri;Neopterygii;Teleostei;Osteoglossocephalai;Clupeocephala;Euteleosteomorpha;Neoteleostei;Eurypterygia;Ctenosquamata;Acanthomorphata;Euacanthomorphacea;Percomorphaceae;Eupercaria;Lophiiformes;Ogcocephalioidei;Ogcocephalidae;Coelophrys;Coelophrys brevicaudata	√	√	√	√	√	√	√	√	×	√	√	×
	Coelorinchus kishinouyei	NC_003169.1	Vertebrata;Gnathostomata;Teleostomi;Euteleostomi;Actinopterygii;Actinopteri;Neopterygii;Teleostei;Osteoglossocephalai;Clupeocephala;Euteleosteomorpha;Neoteleostei;Eurypterygia;Ctenosquamata;Acanthomorphata;Paracanthopterygii;Zeiogadaria;Gadariae;Gadiformes;Macrouroidei;Macrouridae;Macrourinae;Coelorinchus;Coelorinchus kishinouyei	√	√	×	√	√	√	√	√	×	√	√	×
	Coelorinchus multispinulosus	MK386892.1	Vertebrata;Gnathostomata;Teleostomi;Euteleostomi;Actinopterygii;Actinopteri;Neopterygii;Teleostei;Osteoglossocephalai;Clupeocephala;Euteleosteomorpha;Neoteleostei;Eurypterygia;Ctenosquamata;Acanthomorphata;Paracanthopterygii;Zeiogadaria;Gadariae;Gadiformes;Macrouroidei;Macrouridae;Macrourinae;Coelorinchus;Coelorinchus multispinulosus	√	√	×	√	√	√	√	√	×	√	√	×
	Coilia brachygnathus	MK134714.1	Vertebrata;Gnathostomata;Teleostomi;Euteleostomi;Actinopterygii;Actinopteri;Neopterygii;Teleostei;Osteoglossocephalai;Clupeocephala;Otomorpha;Clupei;Clupeiformes;Clupeoidei;Engraulidae;Coilinae;Coilia;Coilia brachygnathus	√	√	√	√	√	√	√	√	×	√	√	×
	Coilia grayii	MH465028.1	Vertebrata;Gnathostomata;Teleostomi;Euteleostomi;Actinopterygii;Actinopteri;Neopterygii;Teleostei;Osteoglossocephalai;Clupeocephala;Otomorpha;Clupei;Clupeiformes;Clupeoidei;Engraulidae;Coilinae;Coilia;Coilia grayii	√	√	√	√	√	√	√	√	×	√	√	×
	Coilia lindmani	NC_014271.1	Vertebrata;Gnathostomata;Teleostomi;Euteleostomi;Actinopterygii;Actinopteri;Neopterygii;Teleostei;Osteoglossocephalai;Clupeocephala;Otomorpha;Clupei;Clupeiformes;Clupeoidei;Engraulidae;Coilinae;Coilia;Coilia lindmani	√	√	√	√	√	√	√	√	×	√	√	×
	Coilia mystus	MH465026.1	Vertebrata;Gnathostomata;Teleostomi;Euteleostomi;Actinopterygii;Actinopteri;Neopterygii;Teleostei;Osteoglossocephalai;Clupeocephala;Otomorpha;Clupei;Clupeiformes;Clupeoidei;Engraulidae;Coilinae;Coilia;Coilia mystus	√	√	√	√	√	√	√	√	×	√	√	×
	Coilia nasus	MH465025.1	Vertebrata;Gnathostomata;Teleostomi;Euteleostomi;Actinopterygii;Actinopteri;Neopterygii;Teleostei;Osteoglossocephalai;Clupeocephala;Otomorpha;Clupei;Clupeiformes;Clupeoidei;Engraulidae;Coilinae;Coilia;Coilia nasus	√	√	√	√	√	√	√	√	×	√	√	×
	Coilia reynaldi	NC_014276.1	Vertebrata;Gnathostomata;Teleostomi;Euteleostomi;Actinopterygii;Actinopteri;Neopterygii;Teleostei;Osteoglossocephalai;Clupeocephala;Otomorpha;Clupei;Clupeiformes;Clupeoidei;Engraulidae;Coilinae;Coilia;Coilia reynaldi	√	√	√	√	√	√	√	√	×	√	×	×
	Colistium nudipinnis	NC_023447.1	Vertebrata;Gnathostomata;Teleostomi;Euteleostomi;Actinopterygii;Actinopteri;Neopterygii;Teleostei;Osteoglossocephalai;Clupeocephala;Euteleosteomorpha;Neoteleostei;Eurypterygia;Ctenosquamata;Acanthomorphata;Euacanthomorphacea;Percomorphaceae;Carangaria;Pleuronectiformes;Pleuronectoidei;Rhombosoleidae;Colistium;Colistium nudipinnis	√	√	√	√	√	√	√	√	×	√	√	×
	Collichthys lucidus	JN857362.1	Vertebrata;Gnathostomata;Teleostomi;Euteleostomi;Actinopterygii;Actinopteri;Neopterygii;Teleostei;Osteoglossocephalai;Clupeocephala;Euteleosteomorpha;Neoteleostei;Eurypterygia;Ctenosquamata;Acanthomorphata;Euacanthomorphacea;Percomorphaceae;Eupercaria;Eupercaria incertae sedis;Sciaenidae;Collichthys;Collichthys lucidus	√	√	√	√	√	√	√	√	×	√	×	×
	Collichthys niveatus	JN678726.1	Vertebrata;Gnathostomata;Teleostomi;Euteleostomi;Actinopterygii;Actinopteri;Neopterygii;Teleostei;Osteoglossocephalai;Clupeocephala;Euteleosteomorpha;Neoteleostei;Eurypterygia;Ctenosquamata;Acanthomorphata;Euacanthomorphacea;Percomorphaceae;Eupercaria;Eupercaria incertae sedis;Sciaenidae;Collichthys;Collichthys niveatus	√	√	√	√	√	√	√	√	×	√	√	×
	Coloconger cadenati	NC_013606.1	Vertebrata;Gnathostomata;Teleostomi;Euteleostomi;Actinopterygii;Actinopteri;Neopterygii;Teleostei;Elopocephalai;Elopocephala;Elopomorpha;Anguilliformes;Colocongridae;Coloconger;Coloconger cadenati	√	√	√	√	√	√	×	√	×	√	√	×
	Cololabis saira	NC_003183.1	Vertebrata;Gnathostomata;Teleostomi;Euteleostomi;Actinopterygii;Actinopteri;Neopterygii;Teleostei;Osteoglossocephalai;Clupeocephala;Euteleosteomorpha;Neoteleostei;Eurypterygia;Ctenosquamata;Acanthomorphata;Euacanthomorphacea;Percomorphaceae;Ovalentaria;Atherinomorphae;Beloniformes;Belonoidei;Belonidae;Cololabis;Cololabis saira	√	√	√	√	√	√	√	√	√	√	√	×
	Colomesus asellus	NC_015368.1	Vertebrata;Gnathostomata;Teleostomi;Euteleostomi;Actinopterygii;Actinopteri;Neopterygii;Teleostei;Osteoglossocephalai;Clupeocephala;Euteleosteomorpha;Neoteleostei;Eurypterygia;Ctenosquamata;Acanthomorphata;Euacanthomorphacea;Percomorphaceae;Eupercaria;Tetraodontiformes;Tetraodontoidei;Tetradontoidea;Tetraodontidae;Colomesus;Colomesus asellus	√	√	√	√	√	√	√	√	×	√	√	×
	Colomesus psittacus	NC_015370.1	Vertebrata;Gnathostomata;Teleostomi;Euteleostomi;Actinopterygii;Actinopteri;Neopterygii;Teleostei;Osteoglossocephalai;Clupeocephala;Euteleosteomorpha;Neoteleostei;Eurypterygia;Ctenosquamata;Acanthomorphata;Euacanthomorphacea;Percomorphaceae;Eupercaria;Tetraodontiformes;Tetraodontoidei;Tetradontoidea;Tetraodontidae;Colomesus;Colomesus psittacus	√	√	√	√	√	√	√	√	×	√	√	×
	Colossoma macropomum	KP188830.1	Vertebrata;Gnathostomata;Teleostomi;Euteleostomi;Actinopterygii;Actinopteri;Neopterygii;Teleostei;Osteoglossocephalai;Clupeocephala;Otomorpha;Ostariophysi;Otophysi;Characiphysae;Characiformes;Characoidei;Serrasalmidae;Colossoma;Colossoma macropomum	√	√	√	√	√	√	√	√	√	√	√	×
	Comephorus baikalensis	MF346886.1	Vertebrata;Gnathostomata;Teleostomi;Euteleostomi;Actinopterygii;Actinopteri;Neopterygii;Teleostei;Osteoglossocephalai;Clupeocephala;Euteleosteomorpha;Neoteleostei;Eurypterygia;Ctenosquamata;Acanthomorphata;Euacanthomorphacea;Percomorphaceae;Eupercaria;Perciformes;Cottioidei;Cottales;Cottidae;Comephorus;Comephorus baikalensis	√	√	√	√	√	√	√	√	×	√	√	×
	Comephorus dybowskii	MF346888.1	Vertebrata;Gnathostomata;Teleostomi;Euteleostomi;Actinopterygii;Actinopteri;Neopterygii;Teleostei;Osteoglossocephalai;Clupeocephala;Euteleosteomorpha;Neoteleostei;Eurypterygia;Ctenosquamata;Acanthomorphata;Euacanthomorphacea;Percomorphaceae;Eupercaria;Perciformes;Cottioidei;Cottales;Cottidae;Comephorus;Comephorus dybowskii	√	√	√	√	√	√	√	√	×	√	√	×
	Conger japonicus	NC_027186.1	Vertebrata;Gnathostomata;Teleostomi;Euteleostomi;Actinopterygii;Actinopteri;Neopterygii;Teleostei;Elopocephalai;Elopocephala;Elopomorpha;Anguilliformes;Congridae;Congrinae;Conger;Conger japonicus	√	√	√	√	√	√	√	√	×	√	√	×
	Conger myriaster	NC_002761.2	Vertebrata;Gnathostomata;Teleostomi;Euteleostomi;Actinopterygii;Actinopteri;Neopterygii;Teleostei;Elopocephalai;Elopocephala;Elopomorpha;Anguilliformes;Congridae;Congrinae;Conger;Conger myriaster	√	√	√	√	√	√	√	√	×	√	√	×
	Congriscus sp. Tht2	NC_013618.1	Vertebrata;Gnathostomata;Teleostomi;Euteleostomi;Actinopterygii;Actinopteri;Neopterygii;Teleostei;Elopocephalai;Elopocephala;Elopomorpha;Anguilliformes;Congridae;Congrinae;Congriscus;unclassified Congriscus;Congriscus sp. Tht2	√	√	√	√	√	√	√	√	×	√	√	×
	Conocara macropterum	NC_013581.1	Vertebrata;Gnathostomata;Teleostomi;Euteleostomi;Actinopterygii;Actinopteri;Neopterygii;Teleostei;Osteoglossocephalai;Clupeocephala;Otomorpha;Alepocephali;Alepocephaliformes;Alepocephalidae;Conocara;Conocara macropterum	√	√	√	√	√	√	√	√	√	√	√	×
	Conocara murrayi	NC_013583.1	Vertebrata;Gnathostomata;Teleostomi;Euteleostomi;Actinopterygii;Actinopteri;Neopterygii;Teleostei;Osteoglossocephalai;Clupeocephala;Otomorpha;Alepocephali;Alepocephaliformes;Alepocephalidae;Conocara;Conocara murrayi	√	√	√	√	√	√	√	√	√	√	×	√
	Copadichromis mloto	NC_030584.1	Vertebrata;Gnathostomata;Teleostomi;Euteleostomi;Actinopterygii;Actinopteri;Neopterygii;Teleostei;Osteoglossocephalai;Clupeocephala;Euteleosteomorpha;Neoteleostei;Eurypterygia;Ctenosquamata;Acanthomorphata;Euacanthomorphacea;Percomorphaceae;Ovalentaria;Cichlomorphae;Cichliformes;Cichlidae;African cichlids;Pseudocrenilabrinae;Haplochromini;Copadichromis;Copadichromis mloto	√	√	√	√	√	√	√	√	×	√	√	×
	Copadichromis quadrimaculatus	NC_030607.1	Vertebrata;Gnathostomata;Teleostomi;Euteleostomi;Actinopterygii;Actinopteri;Neopterygii;Teleostei;Osteoglossocephalai;Clupeocephala;Euteleosteomorpha;Neoteleostei;Eurypterygia;Ctenosquamata;Acanthomorphata;Euacanthomorphacea;Percomorphaceae;Ovalentaria;Cichlomorphae;Cichliformes;Cichlidae;African cichlids;Pseudocrenilabrinae;Haplochromini;Copadichromis;Copadichromis quadrimaculatus	√	√	√	√	√	√	√	√	×	√	√	×
	Copadichromis trimaculatus	NC_035991.1	Vertebrata;Gnathostomata;Teleostomi;Euteleostomi;Actinopterygii;Actinopteri;Neopterygii;Teleostei;Osteoglossocephalai;Clupeocephala;Euteleosteomorpha;Neoteleostei;Eurypterygia;Ctenosquamata;Acanthomorphata;Euacanthomorphacea;Percomorphaceae;Ovalentaria;Cichlomorphae;Cichliformes;Cichlidae;African cichlids;Pseudocrenilabrinae;Haplochromini;Copadichromis;Copadichromis trimaculatus	√	√	√	√	√	√	√	√	×	√	√	×
	Copadichromis virginalis	NC_029761.1	Vertebrata;Gnathostomata;Teleostomi;Euteleostomi;Actinopterygii;Actinopteri;Neopterygii;Teleostei;Osteoglossocephalai;Clupeocephala;Euteleosteomorpha;Neoteleostei;Eurypterygia;Ctenosquamata;Acanthomorphata;Euacanthomorphacea;Percomorphaceae;Ovalentaria;Cichlomorphae;Cichliformes;Cichlidae;African cichlids;Pseudocrenilabrinae;Haplochromini;Copadichromis;Copadichromis virginalis	√	√	√	√	√	√	√	√	×	√	√	×
	Cophecheilus bamen	MK387703.1	Vertebrata;Gnathostomata;Teleostomi;Euteleostomi;Actinopterygii;Actinopteri;Neopterygii;Teleostei;Osteoglossocephalai;Clupeocephala;Otomorpha;Ostariophysi;Otophysi;Cypriniphysae;Cypriniformes;Cyprinoidei;Cyprinidae;Labeoninae;'Semilabeonini';Cophecheilus;Cophecheilus bamen	√	√	√	√	√	√	√	√	√	√	√	×
	Coptodon zillii	NC_026110.1	Vertebrata;Gnathostomata;Teleostomi;Euteleostomi;Actinopterygii;Actinopteri;Neopterygii;Teleostei;Osteoglossocephalai;Clupeocephala;Euteleosteomorpha;Neoteleostei;Eurypterygia;Ctenosquamata;Acanthomorphata;Euacanthomorphacea;Percomorphaceae;Ovalentaria;Cichlomorphae;Cichliformes;Cichlidae;African cichlids;Pseudocrenilabrinae;Coptodonini;Coptodon;Coptodon zillii	√	√	√	√	√	√	√	√	×	√	√	×
	Coregonus artedi	MH301056.1	Vertebrata;Gnathostomata;Teleostomi;Euteleostomi;Actinopterygii;Actinopteri;Neopterygii;Teleostei;Osteoglossocephalai;Clupeocephala;Euteleosteomorpha;Protacanthopterygii;Salmoniformes;Salmonidae;Coregoninae;Coregonus;Coregonus artedi	√	√	√	√	√	√	√	√	×	√	√	×
	Coregonus autumnalis	NC_027277.1	Vertebrata;Gnathostomata;Teleostomi;Euteleostomi;Actinopterygii;Actinopteri;Neopterygii;Teleostei;Osteoglossocephalai;Clupeocephala;Euteleosteomorpha;Protacanthopterygii;Salmoniformes;Salmonidae;Coregoninae;Coregonus;Coregonus autumnalis	√	√	√	√	√	√	√	√	×	√	√	×
	Coregonus baicalensis	NC_045226.1	Vertebrata;Gnathostomata;Teleostomi;Euteleostomi;Actinopterygii;Actinopteri;Neopterygii;Teleostei;Osteoglossocephalai;Clupeocephala;Euteleosteomorpha;Protacanthopterygii;Salmoniformes;Salmonidae;Coregoninae;Coregonus;Coregonus baicalensis	√	√	√	√	√	√	√	√	×	√	√	×
	Coregonus chadary	NC_030175.1	Vertebrata;Gnathostomata;Teleostomi;Euteleostomi;Actinopterygii;Actinopteri;Neopterygii;Teleostei;Osteoglossocephalai;Clupeocephala;Euteleosteomorpha;Protacanthopterygii;Salmoniformes;Salmonidae;Coregoninae;Coregonus;Coregonus chadary	√	√	√	√	√	√	√	√	×	√	√	×
	Coregonus clupeaformis	MH301058.1	Vertebrata;Gnathostomata;Teleostomi;Euteleostomi;Actinopterygii;Actinopteri;Neopterygii;Teleostei;Osteoglossocephalai;Clupeocephala;Euteleosteomorpha;Protacanthopterygii;Salmoniformes;Salmonidae;Coregoninae;Coregonus;Coregonus clupeaformis	√	√	√	√	√	√	√	√	×	√	√	×
	Coregonus lavaretus	NC_002646.1	Vertebrata;Gnathostomata;Teleostomi;Euteleostomi;Actinopterygii;Actinopteri;Neopterygii;Teleostei;Osteoglossocephalai;Clupeocephala;Euteleosteomorpha;Protacanthopterygii;Salmoniformes;Salmonidae;Coregoninae;Coregonus;Coregonus lavaretus	√	√	√	√	√	√	√	√	×	√	√	×
	Coregonus migratorius	NC_045227.1	Vertebrata;Gnathostomata;Teleostomi;Euteleostomi;Actinopterygii;Actinopteri;Neopterygii;Teleostei;Osteoglossocephalai;Clupeocephala;Euteleosteomorpha;Protacanthopterygii;Salmoniformes;Salmonidae;Coregoninae;Coregonus;Coregonus migratorius	√	√	√	√	√	√	√	√	×	√	√	×
	Coregonus muksun	NC_028593.1	Vertebrata;Gnathostomata;Teleostomi;Euteleostomi;Actinopterygii;Actinopteri;Neopterygii;Teleostei;Osteoglossocephalai;Clupeocephala;Euteleosteomorpha;Protacanthopterygii;Salmoniformes;Salmonidae;Coregoninae;Coregonus;Coregonus muksun	√	√	√	√	√	√	√	√	×	√	√	×
	Coregonus nasus	NC_020760.1	Vertebrata;Gnathostomata;Teleostomi;Euteleostomi;Actinopterygii;Actinopteri;Neopterygii;Teleostei;Osteoglossocephalai;Clupeocephala;Euteleosteomorpha;Protacanthopterygii;Salmoniformes;Salmonidae;Coregoninae;Coregonus;Coregonus nasus	√	√	√	√	√	√	√	√	×	√	√	×
	Coregonus oxyrinchus	NC_020765.1	Vertebrata;Gnathostomata;Teleostomi;Euteleostomi;Actinopterygii;Actinopteri;Neopterygii;Teleostei;Osteoglossocephalai;Clupeocephala;Euteleosteomorpha;Protacanthopterygii;Salmoniformes;Salmonidae;Coregoninae;Coregonus;Coregonus oxyrinchus	√	√	√	√	√	√	√	√	×	√	√	×
	Coregonus peled	NC_025576.1	Vertebrata;Gnathostomata;Teleostomi;Euteleostomi;Actinopterygii;Actinopteri;Neopterygii;Teleostei;Osteoglossocephalai;Clupeocephala;Euteleosteomorpha;Protacanthopterygii;Salmoniformes;Salmonidae;Coregoninae;Coregonus;Coregonus peled	√	√	√	√	√	√	√	√	×	√	√	×
	Coregonus sp. 'cluncaformis'	NC_028198.1	Vertebrata;Gnathostomata;Teleostomi;Euteleostomi;Actinopterygii;Actinopteri;Neopterygii;Teleostei;Osteoglossocephalai;Clupeocephala;Euteleosteomorpha;Protacanthopterygii;Salmoniformes;Salmonidae;Coregoninae;Coregonus;unclassified Coregonus;Coregonus sp. 'cluncaformis'	√	√	√	√	√	√	√	√	×	√	√	×
	Coregonus ussuriensis	NC_025648.1	Vertebrata;Gnathostomata;Teleostomi;Euteleostomi;Actinopterygii;Actinopteri;Neopterygii;Teleostei;Osteoglossocephalai;Clupeocephala;Euteleosteomorpha;Protacanthopterygii;Salmoniformes;Salmonidae;Coregoninae;Coregonus;Coregonus ussuriensis	√	√	√	√	√	√	√	√	×	√	√	×
	Coreius guichenoti	NC_020041.1	Vertebrata;Gnathostomata;Teleostomi;Euteleostomi;Actinopterygii;Actinopteri;Neopterygii;Teleostei;Osteoglossocephalai;Clupeocephala;Otomorpha;Ostariophysi;Otophysi;Cypriniphysae;Cypriniformes;Cyprinoidei;Gobionidae;Gobionidae incertae sedis;Coreius;Coreius guichenoti	√	√	√	√	√	√	√	√	√	√	√	×
	Coreius heterodon	NC_020042.1	Vertebrata;Gnathostomata;Teleostomi;Euteleostomi;Actinopterygii;Actinopteri;Neopterygii;Teleostei;Osteoglossocephalai;Clupeocephala;Otomorpha;Ostariophysi;Otophysi;Cypriniphysae;Cypriniformes;Cyprinoidei;Gobionidae;Gobionidae incertae sedis;Coreius;Coreius heterodon	√	√	√	√	√	√	√	√	√	√	√	×
	Coreoleuciscus splendidus	EU848546.1	Vertebrata;Gnathostomata;Teleostomi;Euteleostomi;Actinopterygii;Actinopteri;Neopterygii;Teleostei;Osteoglossocephalai;Clupeocephala;Otomorpha;Ostariophysi;Otophysi;Cypriniphysae;Cypriniformes;Cyprinoidei;Gobionidae;Sarcocheilichthyinae;Coreoleuciscus;Coreoleuciscus splendidus	√	√	√	√	√	√	√	√	√	√	√	×
	Coreoperca herzi	NC_027164.1	Vertebrata;Gnathostomata;Teleostomi;Euteleostomi;Actinopterygii;Actinopteri;Neopterygii;Teleostei;Osteoglossocephalai;Clupeocephala;Euteleosteomorpha;Neoteleostei;Eurypterygia;Ctenosquamata;Acanthomorphata;Euacanthomorphacea;Percomorphaceae;Eupercaria;Centrarchiformes;Centrarchoidei;Sinipercidae;Coreoperca;Coreoperca herzi	√	√	√	√	√	√	√	√	×	√	√	×
	Coreoperca kawamebari	NC_009868.1	Vertebrata;Gnathostomata;Teleostomi;Euteleostomi;Actinopterygii;Actinopteri;Neopterygii;Teleostei;Osteoglossocephalai;Clupeocephala;Euteleosteomorpha;Neoteleostei;Eurypterygia;Ctenosquamata;Acanthomorphata;Euacanthomorphacea;Percomorphaceae;Eupercaria;Centrarchiformes;Centrarchoidei;Sinipercidae;Coreoperca;Coreoperca kawamebari	√	√	√	√	√	√	√	√	×	√	√	×
	Coreoperca loona	NC_024431.1	Vertebrata;Gnathostomata;Teleostomi;Euteleostomi;Actinopterygii;Actinopteri;Neopterygii;Teleostei;Osteoglossocephalai;Clupeocephala;Euteleosteomorpha;Neoteleostei;Eurypterygia;Ctenosquamata;Acanthomorphata;Euacanthomorphacea;Percomorphaceae;Eupercaria;Centrarchiformes;Centrarchoidei;Sinipercidae;Siniperca;Siniperca loona	√	√	√	√	√	√	√	√	×	√	√	×
	Coreoperca whiteheadi	KJ149811.1	Vertebrata;Gnathostomata;Teleostomi;Euteleostomi;Actinopterygii;Actinopteri;Neopterygii;Teleostei;Osteoglossocephalai;Clupeocephala;Euteleosteomorpha;Neoteleostei;Eurypterygia;Ctenosquamata;Acanthomorphata;Euacanthomorphacea;Percomorphaceae;Eupercaria;Centrarchiformes;Centrarchoidei;Sinipercidae;Coreoperca;Coreoperca whiteheadi	√	√	√	√	√	√	√	√	×	√	√	×
	Corydoras agassizii	MN641875.1	Vertebrata;Gnathostomata;Teleostomi;Euteleostomi;Actinopterygii;Actinopteri;Neopterygii;Teleostei;Osteoglossocephalai;Clupeocephala;Otomorpha;Ostariophysi;Otophysi;Characiphysae;Siluriformes;Loricarioidei;Callichthyidae;Corydoras;Corydoras agassizii	√	√	√	√	√	√	√	√	√	√	√	×
	Corydoras arcuatus	NC_049096.1	Vertebrata;Gnathostomata;Teleostomi;Euteleostomi;Actinopterygii;Actinopteri;Neopterygii;Teleostei;Osteoglossocephalai;Clupeocephala;Otomorpha;Ostariophysi;Otophysi;Characiphysae;Siluriformes;Loricarioidei;Callichthyidae;Corydoras;Corydoras arcuatus	√	√	√	√	√	√	√	√	√	√	√	×
	Corydoras duplicareus	NC_049095.1	Vertebrata;Gnathostomata;Teleostomi;Euteleostomi;Actinopterygii;Actinopteri;Neopterygii;Teleostei;Osteoglossocephalai;Clupeocephala;Otomorpha;Ostariophysi;Otophysi;Characiphysae;Siluriformes;Loricarioidei;Callichthyidae;Corydoras;Corydoras duplicareus	√	√	√	√	√	√	√	√	√	√	√	×
	Corydoras nattereri	KT239009.1	Vertebrata;Gnathostomata;Teleostomi;Euteleostomi;Actinopterygii;Actinopteri;Neopterygii;Teleostei;Osteoglossocephalai;Clupeocephala;Otomorpha;Ostariophysi;Otophysi;Characiphysae;Siluriformes;Loricarioidei;Callichthyidae;Corydoras;Corydoras nattereri	√	√	√	√	√	√	√	√	√	√	√	×
	Corydoras panda	NC_049097.1	Vertebrata;Gnathostomata;Teleostomi;Euteleostomi;Actinopterygii;Actinopteri;Neopterygii;Teleostei;Osteoglossocephalai;Clupeocephala;Otomorpha;Ostariophysi;Otophysi;Characiphysae;Siluriformes;Loricarioidei;Callichthyidae;Corydoras;Corydoras panda	√	√	√	√	√	√	√	√	√	√	√	×
	Corydoras rabauti	NC_004698.1	Vertebrata;Gnathostomata;Teleostomi;Euteleostomi;Actinopterygii;Actinopteri;Neopterygii;Teleostei;Osteoglossocephalai;Clupeocephala;Otomorpha;Ostariophysi;Otophysi;Characiphysae;Siluriformes;Loricarioidei;Callichthyidae;Corydoras;Corydoras rabauti	√	√	√	√	√	√	√	√	√	√	√	×
	Corydoras sterbai	NC_048967.1	Vertebrata;Gnathostomata;Teleostomi;Euteleostomi;Actinopterygii;Actinopteri;Neopterygii;Teleostei;Osteoglossocephalai;Clupeocephala;Otomorpha;Ostariophysi;Otophysi;Characiphysae;Siluriformes;Loricarioidei;Callichthyidae;Corydoras;Corydoras sterbai	√	√	√	√	√	√	√	√	√	√	√	×
	Corydoras trilineatus	NC_049098.1	Vertebrata;Gnathostomata;Teleostomi;Euteleostomi;Actinopterygii;Actinopteri;Neopterygii;Teleostei;Osteoglossocephalai;Clupeocephala;Otomorpha;Ostariophysi;Otophysi;Characiphysae;Siluriformes;Loricarioidei;Callichthyidae;Corydoras;Corydoras trilineatus	√	√	√	√	√	√	√	√	√	√	√	×
	Coryphaena equiselis	MH576916.1	Vertebrata;Gnathostomata;Teleostomi;Euteleostomi;Actinopterygii;Actinopteri;Neopterygii;Teleostei;Osteoglossocephalai;Clupeocephala;Euteleosteomorpha;Neoteleostei;Eurypterygia;Ctenosquamata;Acanthomorphata;Euacanthomorphacea;Percomorphaceae;Carangaria;Carangiformes;Coryphaenidae;Coryphaena;Coryphaena equiselis	√	√	√	√	√	√	√	√	×	√	√	×
	Coryphaena hippurus	MH576915.1	Vertebrata;Gnathostomata;Teleostomi;Euteleostomi;Actinopterygii;Actinopteri;Neopterygii;Teleostei;Osteoglossocephalai;Clupeocephala;Euteleosteomorpha;Neoteleostei;Eurypterygia;Ctenosquamata;Acanthomorphata;Euacanthomorphacea;Percomorphaceae;Carangaria;Carangiformes;Coryphaenidae;Coryphaena;Coryphaena hippurus	√	√	√	√	√	√	√	√	×	√	√	×
	Corythoichthys flavofasciatus	KJ139455.1	Vertebrata;Gnathostomata;Teleostomi;Euteleostomi;Actinopterygii;Actinopteri;Neopterygii;Teleostei;Osteoglossocephalai;Clupeocephala;Euteleosteomorpha;Neoteleostei;Eurypterygia;Ctenosquamata;Acanthomorphata;Euacanthomorphacea;Percomorphaceae;Syngnathiaria;Syngnathiformes;Syngnathoidei;Syngnathidae;Syngnathinae;Corythoichthys;Corythoichthys flavofasciatus	√	√	√	√	√	√	√	√	×	√	√	×
	Cottiusculus nihonkaiensis	NC_045245.1	Vertebrata;Gnathostomata;Teleostomi;Euteleostomi;Actinopterygii;Actinopteri;Neopterygii;Teleostei;Osteoglossocephalai;Clupeocephala;Euteleosteomorpha;Neoteleostei;Eurypterygia;Ctenosquamata;Acanthomorphata;Euacanthomorphacea;Percomorphaceae;Eupercaria;Perciformes;Cottioidei;Cottales;Cottidae;Cottiusculus;Cottiusculus nihonkaiensis	√	√	√	√	√	√	√	√	×	√	√	×
	Cottus amblystomopsis	NC_035002.1	Vertebrata;Gnathostomata;Teleostomi;Euteleostomi;Actinopterygii;Actinopteri;Neopterygii;Teleostei;Osteoglossocephalai;Clupeocephala;Euteleosteomorpha;Neoteleostei;Eurypterygia;Ctenosquamata;Acanthomorphata;Euacanthomorphacea;Percomorphaceae;Eupercaria;Perciformes;Cottioidei;Cottales;Cottidae;Cottus;Cottus amblystomopsis	√	√	√	√	√	√	√	√	×	√	√	×
	Cottus asper	MF326939.1	Vertebrata;Gnathostomata;Teleostomi;Euteleostomi;Actinopterygii;Actinopteri;Neopterygii;Teleostei;Osteoglossocephalai;Clupeocephala;Euteleosteomorpha;Neoteleostei;Eurypterygia;Ctenosquamata;Acanthomorphata;Euacanthomorphacea;Percomorphaceae;Eupercaria;Perciformes;Cottioidei;Cottales;Cottidae;Cottus;Cottus asper	√	√	√	√	√	√	√	√	×	√	√	×
	Cottus bairdii	NC_028277.1	Vertebrata;Gnathostomata;Teleostomi;Euteleostomi;Actinopterygii;Actinopteri;Neopterygii;Teleostei;Osteoglossocephalai;Clupeocephala;Euteleosteomorpha;Neoteleostei;Eurypterygia;Ctenosquamata;Acanthomorphata;Euacanthomorphacea;Percomorphaceae;Eupercaria;Perciformes;Cottioidei;Cottales;Cottidae;Cottus;Cottus bairdii	√	√	√	√	√	√	√	√	×	√	√	×
	Cottus czerskii	KY783660.1	Vertebrata;Gnathostomata;Teleostomi;Euteleostomi;Actinopterygii;Actinopteri;Neopterygii;Teleostei;Osteoglossocephalai;Clupeocephala;Euteleosteomorpha;Neoteleostei;Eurypterygia;Ctenosquamata;Acanthomorphata;Euacanthomorphacea;Percomorphaceae;Eupercaria;Perciformes;Cottioidei;Cottales;Cottidae;Cottus;Cottus czerskii	√	√	√	√	√	√	√	√	×	√	×	×
	Cottus dzungaricus	MH638324.1	Vertebrata;Gnathostomata;Teleostomi;Euteleostomi;Actinopterygii;Actinopteri;Neopterygii;Teleostei;Osteoglossocephalai;Clupeocephala;Euteleosteomorpha;Neoteleostei;Eurypterygia;Ctenosquamata;Acanthomorphata;Euacanthomorphacea;Percomorphaceae;Eupercaria;Perciformes;Cottioidei;Cottales;Cottidae;Cottus;Cottus dzungaricus	√	√	√	√	√	√	√	√	×	√	√	×
	Cottus hangiongensis	NC_014851.1	Vertebrata;Gnathostomata;Teleostomi;Euteleostomi;Actinopterygii;Actinopteri;Neopterygii;Teleostei;Osteoglossocephalai;Clupeocephala;Euteleosteomorpha;Neoteleostei;Eurypterygia;Ctenosquamata;Acanthomorphata;Euacanthomorphacea;Percomorphaceae;Eupercaria;Perciformes;Cottioidei;Cottales;Cottidae;Cottus;Cottus hangiongensis	√	√	√	√	√	√	√	√	×	√	√	×
	Cottus perifretum	MF326940.1	Vertebrata;Gnathostomata;Teleostomi;Euteleostomi;Actinopterygii;Actinopteri;Neopterygii;Teleostei;Osteoglossocephalai;Clupeocephala;Euteleosteomorpha;Neoteleostei;Eurypterygia;Ctenosquamata;Acanthomorphata;Euacanthomorphacea;Percomorphaceae;Eupercaria;Perciformes;Cottioidei;Cottales;Cottidae;Cottus;Cottus perifretum	√	√	√	√	√	√	√	√	×	√	√	×
	Cottus poecilopus	NC_014849.1	Vertebrata;Gnathostomata;Teleostomi;Euteleostomi;Actinopterygii;Actinopteri;Neopterygii;Teleostei;Osteoglossocephalai;Clupeocephala;Euteleosteomorpha;Neoteleostei;Eurypterygia;Ctenosquamata;Acanthomorphata;Euacanthomorphacea;Percomorphaceae;Eupercaria;Perciformes;Cottioidei;Cottales;Cottidae;Cottus;Cottus poecilopus	√	√	√	√	√	√	√	√	×	√	×	×
	Cottus reinii	NC_004404.1	Vertebrata;Gnathostomata;Teleostomi;Euteleostomi;Actinopterygii;Actinopteri;Neopterygii;Teleostei;Osteoglossocephalai;Clupeocephala;Euteleosteomorpha;Neoteleostei;Eurypterygia;Ctenosquamata;Acanthomorphata;Euacanthomorphacea;Percomorphaceae;Eupercaria;Perciformes;Cottioidei;Cottales;Cottidae;Cottus;Cottus reinii	√	√	√	√	√	√	√	√	×	√	√	√
	Cottus rhenanus	MF326941.1	Vertebrata;Gnathostomata;Teleostomi;Euteleostomi;Actinopterygii;Actinopteri;Neopterygii;Teleostei;Osteoglossocephalai;Clupeocephala;Euteleosteomorpha;Neoteleostei;Eurypterygia;Ctenosquamata;Acanthomorphata;Euacanthomorphacea;Percomorphaceae;Eupercaria;Perciformes;Cottioidei;Cottales;Cottidae;Cottus;Cottus rhenanus	√	√	√	√	√	√	√	√	×	√	√	×
	Cottus szanaga	NC_032039.1	Vertebrata;Gnathostomata;Teleostomi;Euteleostomi;Actinopterygii;Actinopteri;Neopterygii;Teleostei;Osteoglossocephalai;Clupeocephala;Euteleosteomorpha;Neoteleostei;Eurypterygia;Ctenosquamata;Acanthomorphata;Euacanthomorphacea;Percomorphaceae;Eupercaria;Perciformes;Cottioidei;Cottales;Cottidae;Cottus;Cottus szanaga	√	√	√	√	√	√	√	√	×	√	√	×
	Cottus volki	NC_035001.1	Vertebrata;Gnathostomata;Teleostomi;Euteleostomi;Actinopterygii;Actinopteri;Neopterygii;Teleostei;Osteoglossocephalai;Clupeocephala;Euteleosteomorpha;Neoteleostei;Eurypterygia;Ctenosquamata;Acanthomorphata;Euacanthomorphacea;Percomorphaceae;Eupercaria;Perciformes;Cottioidei;Cottales;Cottidae;Cottus;Cottus volki	√	√	√	√	√	√	√	√	×	√	√	×
	Cranoglanis bouderius	AY898626.1	Vertebrata;Gnathostomata;Teleostomi;Euteleostomi;Actinopterygii;Actinopteri;Neopterygii;Teleostei;Osteoglossocephalai;Clupeocephala;Otomorpha;Ostariophysi;Otophysi;Characiphysae;Siluriformes;Siluroidei;Cranoglanididae;Cranoglanis;Cranoglanis bouderius	√	√	√	√	√	√	√	√	√	√	√	×
	Craterocephalus eyresii	NC_035148.1	Vertebrata;Gnathostomata;Teleostomi;Euteleostomi;Actinopterygii;Actinopteri;Neopterygii;Teleostei;Osteoglossocephalai;Clupeocephala;Euteleosteomorpha;Neoteleostei;Eurypterygia;Ctenosquamata;Acanthomorphata;Euacanthomorphacea;Percomorphaceae;Ovalentaria;Atherinomorphae;Atheriniformes;Atherinidae;Atherininae;Craterocephalus;Craterocephalus eyresii	√	√	√	√	√	√	√	√	×	√	√	×
	Craterocephalus stramineus	NC_043854.1	Vertebrata;Gnathostomata;Teleostomi;Euteleostomi;Actinopterygii;Actinopteri;Neopterygii;Teleostei;Osteoglossocephalai;Clupeocephala;Euteleosteomorpha;Neoteleostei;Eurypterygia;Ctenosquamata;Acanthomorphata;Euacanthomorphacea;Percomorphaceae;Ovalentaria;Atherinomorphae;Atheriniformes;Atherinidae;Atherininae;Craterocephalus;Craterocephalus stramineus	√	√	√	√	√	√	√	√	×	√	√	×
	Crenichthys baileyi moapae	KY014104.1	Vertebrata;Gnathostomata;Teleostomi;Euteleostomi;Actinopterygii;Actinopteri;Neopterygii;Teleostei;Osteoglossocephalai;Clupeocephala;Euteleosteomorpha;Neoteleostei;Eurypterygia;Ctenosquamata;Acanthomorphata;Euacanthomorphacea;Percomorphaceae;Ovalentaria;Atherinomorphae;Cyprinodontiformes;Cyprinodontoidei;Goodeidae;Crenichthys;Crenichthys baileyi;Crenichthys baileyi moapae	√	√	√	√	√	√	√	√	×	√	√	×
	Crenimugil crenilabis	JF911707.1	Vertebrata;Gnathostomata;Teleostomi;Euteleostomi;Actinopterygii;Actinopteri;Neopterygii;Teleostei;Osteoglossocephalai;Clupeocephala;Euteleosteomorpha;Neoteleostei;Eurypterygia;Ctenosquamata;Acanthomorphata;Euacanthomorphacea;Percomorphaceae;Ovalentaria;Mugilomorphae;Mugiliformes;Mugilidae;Crenimugil;Crenimugil crenilabis	√	√	√	√	√	√	√	√	×	√	×	×
	Crenuchus spilurus	AP011986.1	Vertebrata;Gnathostomata;Teleostomi;Euteleostomi;Actinopterygii;Actinopteri;Neopterygii;Teleostei;Osteoglossocephalai;Clupeocephala;Otomorpha;Ostariophysi;Otophysi;Characiphysae;Characiformes;Characoidei;Crenuchidae;Crenuchinae;Crenuchus;Crenuchus spilurus	√	√	√	√	√	√	√	√	√	√	√	×
	Creteuchiloglanis gongshanensis	KU160626.1	Vertebrata;Gnathostomata;Teleostomi;Euteleostomi;Actinopterygii;Actinopteri;Neopterygii;Teleostei;Osteoglossocephalai;Clupeocephala;Otomorpha;Ostariophysi;Otophysi;Characiphysae;Siluriformes;Siluroidei;Sisoridae;Glyptosterninae;Creteuchiloglanis;Creteuchiloglanis gongshanensis	√	√	√	√	√	√	√	√	√	√	√	×
	Creteuchiloglanis kamengensis	NC_045213.1	Vertebrata;Gnathostomata;Teleostomi;Euteleostomi;Actinopterygii;Actinopteri;Neopterygii;Teleostei;Osteoglossocephalai;Clupeocephala;Otomorpha;Ostariophysi;Otophysi;Characiphysae;Siluriformes;Siluroidei;Sisoridae;Glyptosterninae;Creteuchiloglanis;Creteuchiloglanis kamengensis	√	√	√	√	√	√	√	√	√	√	√	×
	Creteuchiloglanis macropterus	NC_028509.1	Vertebrata;Gnathostomata;Teleostomi;Euteleostomi;Actinopterygii;Actinopteri;Neopterygii;Teleostei;Osteoglossocephalai;Clupeocephala;Otomorpha;Ostariophysi;Otophysi;Characiphysae;Siluriformes;Siluroidei;Sisoridae;Glyptosterninae;Creteuchiloglanis;Creteuchiloglanis macropterus	√	√	√	√	√	√	√	√	√	√	√	×
	Cromileptes altivelis	NC_021614.1	Vertebrata;Gnathostomata;Teleostomi;Euteleostomi;Actinopterygii;Actinopteri;Neopterygii;Teleostei;Osteoglossocephalai;Clupeocephala;Euteleosteomorpha;Neoteleostei;Eurypterygia;Ctenosquamata;Acanthomorphata;Euacanthomorphacea;Percomorphaceae;Eupercaria;Perciformes;Serranoidei;Serranidae;Epinephelinae;Epinephelini;Cromileptes;Cromileptes altivelis	√	√	√	√	√	√	√	√	×	√	√	×
	Cromileptes altivelis x Epinephelus lanceolatus	NC_034675.1	Vertebrata;Gnathostomata;Teleostomi;Euteleostomi;Actinopterygii;Actinopteri;Neopterygii;Teleostei;Osteoglossocephalai;Clupeocephala;Euteleosteomorpha;Neoteleostei;Eurypterygia;Ctenosquamata;Acanthomorphata;Euacanthomorphacea;Percomorphaceae;Eupercaria;Perciformes;Serranoidei;Serranidae;Epinephelinae;Epinephelini;Epinephelini intergeneric hybrids;Cromileptes altivelis x Epinephelus lanceolatus	√	√	√	√	√	√	√	√	×	√	√	×
	Crossocheilus atrilimes	NC_029447.1	Vertebrata;Gnathostomata;Teleostomi;Euteleostomi;Actinopterygii;Actinopteri;Neopterygii;Teleostei;Osteoglossocephalai;Clupeocephala;Otomorpha;Ostariophysi;Otophysi;Cypriniphysae;Cypriniformes;Cyprinoidei;Cyprinidae;Labeoninae;'Osteochilini';Crossocheilus;Crossocheilus atrilimes	√	√	√	√	√	√	√	√	√	√	√	×
	Crossocheilus siamensis	NC_031827.1	Vertebrata;Gnathostomata;Teleostomi;Euteleostomi;Actinopterygii;Actinopteri;Neopterygii;Teleostei;Osteoglossocephalai;Clupeocephala;Otomorpha;Ostariophysi;Otophysi;Cypriniphysae;Cypriniformes;Cyprinoidei;Cyprinidae;Labeoninae;'Osteochilini';Crossocheilus;Crossocheilus siamensis	√	√	√	√	√	√	√	√	√	√	×	×
	Crossorhombus azureus	NC_022446.1	Vertebrata;Gnathostomata;Teleostomi;Euteleostomi;Actinopterygii;Actinopteri;Neopterygii;Teleostei;Osteoglossocephalai;Clupeocephala;Euteleosteomorpha;Neoteleostei;Eurypterygia;Ctenosquamata;Acanthomorphata;Euacanthomorphacea;Percomorphaceae;Carangaria;Pleuronectiformes;Pleuronectoidei;Bothidae;Crossorhombus;Crossorhombus azureus	√	√	√	√	×	√	√	√	√	√	√	×
	Crossorhombus valderostratus	NC_030366.1	Vertebrata;Gnathostomata;Teleostomi;Euteleostomi;Actinopterygii;Actinopteri;Neopterygii;Teleostei;Osteoglossocephalai;Clupeocephala;Euteleosteomorpha;Neoteleostei;Eurypterygia;Ctenosquamata;Acanthomorphata;Euacanthomorphacea;Percomorphaceae;Carangaria;Pleuronectiformes;Pleuronectoidei;Bothidae;Crossorhombus;Crossorhombus valderostratus	√	√	√	√	×	√	√	√	√	√	√	×
	Cryodraco antarcticus	NC_045285.1	Vertebrata;Gnathostomata;Teleostomi;Euteleostomi;Actinopterygii;Actinopteri;Neopterygii;Teleostei;Osteoglossocephalai;Clupeocephala;Euteleosteomorpha;Neoteleostei;Eurypterygia;Ctenosquamata;Acanthomorphata;Euacanthomorphacea;Percomorphaceae;Eupercaria;Perciformes;Notothenioidei;Channichthyidae;Cryodraco;Cryodraco antarcticus	√	√	√	√	√	√	√	√	×	√	√	×
	Cryptocentrus cinctus	MT199211.1	Vertebrata;Gnathostomata;Teleostomi;Euteleostomi;Actinopterygii;Actinopteri;Neopterygii;Teleostei;Osteoglossocephalai;Clupeocephala;Euteleosteomorpha;Neoteleostei;Eurypterygia;Ctenosquamata;Acanthomorphata;Euacanthomorphacea;Percomorphaceae;Gobiaria;Gobiiformes;Gobioidei;Gobiidae;Gobiinae;Cryptocentrus;Cryptocentrus cinctus	√	√	√	√	√	√	√	√	√	√	√	×
	Cryptoheros cutteri	NC_033552.1	Vertebrata;Gnathostomata;Teleostomi;Euteleostomi;Actinopterygii;Actinopteri;Neopterygii;Teleostei;Osteoglossocephalai;Clupeocephala;Euteleosteomorpha;Neoteleostei;Eurypterygia;Ctenosquamata;Acanthomorphata;Euacanthomorphacea;Percomorphaceae;Ovalentaria;Cichlomorphae;Cichliformes;Cichlidae;New World cichlids;Cichlasomatinae;Heroini;Cryptoheros;Cryptoheros;Cryptoheros cutteri	√	√	√	√	√	√	√	√	×	√	√	×
	Cryptopsaras couesii	NC_013880.1	Vertebrata;Gnathostomata;Teleostomi;Euteleostomi;Actinopterygii;Actinopteri;Neopterygii;Teleostei;Osteoglossocephalai;Clupeocephala;Euteleosteomorpha;Neoteleostei;Eurypterygia;Ctenosquamata;Acanthomorphata;Euacanthomorphacea;Percomorphaceae;Eupercaria;Lophiiformes;Ceratioidei;Ceratiidae;Cryptopsaras;Cryptopsaras couesii	√	√	√	×	×	√	√	√	×	√	√	×
	Crystallogobius linearis	MN122854.1	Vertebrata;Gnathostomata;Teleostomi;Euteleostomi;Actinopterygii;Actinopteri;Neopterygii;Teleostei;Osteoglossocephalai;Clupeocephala;Euteleosteomorpha;Neoteleostei;Eurypterygia;Ctenosquamata;Acanthomorphata;Euacanthomorphacea;Percomorphaceae;Gobiaria;Gobiiformes;Gobioidei;Gobiidae;Gobiinae;Crystallogobius;Crystallogobius linearis	√	√	√	√	√	√	√	√	√	√	√	×
	Ctenochaetus striatus	KU244260.1	Vertebrata;Gnathostomata;Teleostomi;Euteleostomi;Actinopterygii;Actinopteri;Neopterygii;Teleostei;Osteoglossocephalai;Clupeocephala;Euteleosteomorpha;Neoteleostei;Eurypterygia;Ctenosquamata;Acanthomorphata;Euacanthomorphacea;Percomorphaceae;Eupercaria;Acanthuriformes;Acanthuridae;Acanthurinae;Ctenochaetus;Ctenochaetus striatus	√	√	√	√	√	√	√	√	×	√	√	×
	Ctenolabrus rupestris	MT410914.1	Vertebrata;Gnathostomata;Teleostomi;Euteleostomi;Actinopterygii;Actinopteri;Neopterygii;Teleostei;Osteoglossocephalai;Clupeocephala;Euteleosteomorpha;Neoteleostei;Eurypterygia;Ctenosquamata;Acanthomorphata;Euacanthomorphacea;Percomorphaceae;Eupercaria;Labriformes;Labridae;Ctenolabrus;Ctenolabrus rupestris	√	√	√	√	√	√	√	√	×	√	√	×
	Ctenolucius hujeta	AP011987.1	Vertebrata;Gnathostomata;Teleostomi;Euteleostomi;Actinopterygii;Actinopteri;Neopterygii;Teleostei;Osteoglossocephalai;Clupeocephala;Otomorpha;Ostariophysi;Otophysi;Characiphysae;Characiformes;Characoidei;Ctenoluciidae;Ctenolucius;Ctenolucius hujeta	√	√	√	√	√	√	√	√	√	√	√	×
	Ctenopharyngodon idella	MT954923.1	Vertebrata;Gnathostomata;Teleostomi;Euteleostomi;Actinopterygii;Actinopteri;Neopterygii;Teleostei;Osteoglossocephalai;Clupeocephala;Otomorpha;Ostariophysi;Otophysi;Cypriniphysae;Cypriniformes;Cyprinoidei;Xenocyprididae;Xenocypridinae;Ctenopharyngodon;Ctenopharyngodon idella	√	√	√	√	√	√	√	√	√	√	√	×
	Ctenopharyngodon idella x Megalobrama amblycephala	NC_018134.1	Vertebrata;Gnathostomata;Teleostomi;Euteleostomi;Actinopterygii;Actinopteri;Neopterygii;Teleostei;Osteoglossocephalai;Clupeocephala;Otomorpha;Ostariophysi;Otophysi;Cypriniphysae;Cypriniformes;Cyprinoidei;Cyprinoidei intergeneric hybrids;Ctenopharyngodon idella x Megalobrama amblycephala	√	√	√	√	√	√	√	√	√	√	√	×
	Ctenopharyngodon idella x Squaliobarbus curriculus	NC_020466.1	Vertebrata;Gnathostomata;Teleostomi;Euteleostomi;Actinopterygii;Actinopteri;Neopterygii;Teleostei;Osteoglossocephalai;Clupeocephala;Otomorpha;Ostariophysi;Otophysi;Cypriniphysae;Cypriniformes;Cyprinoidei;Cyprinoidei intergeneric hybrids;Ctenopharyngodon idella x Squaliobarbus curriculus	√	√	√	√	√	√	√	√	√	√	√	×
	Ctenopharyngodon idellus x Elopichthys bambusa	NC_025590.1	Vertebrata;Gnathostomata;Teleostomi;Euteleostomi;Actinopterygii;Actinopteri;Neopterygii;Teleostei;Osteoglossocephalai;Clupeocephala;Otomorpha;Ostariophysi;Otophysi;Cypriniphysae;Cypriniformes;Cyprinoidei;Cyprinoidei intergeneric hybrids;Ctenopharyngodon idellus x Elopichthys bambusa	√	√	√	√	√	√	√	√	√	√	√	×
	Cubiceps pauciradiatus	NC_013150.1	Vertebrata;Gnathostomata;Teleostomi;Euteleostomi;Actinopterygii;Actinopteri;Neopterygii;Teleostei;Osteoglossocephalai;Clupeocephala;Euteleosteomorpha;Neoteleostei;Eurypterygia;Ctenosquamata;Acanthomorphata;Euacanthomorphacea;Percomorphaceae;Pelagiaria;Scombriformes;Nomeidae;Cubiceps;Cubiceps pauciradiatus	√	√	√	√	√	√	√	√	×	√	√	×
	Cubiceps squamiceps	NC_029845.1	Vertebrata;Gnathostomata;Teleostomi;Euteleostomi;Actinopterygii;Actinopteri;Neopterygii;Teleostei;Osteoglossocephalai;Clupeocephala;Euteleosteomorpha;Neoteleostei;Eurypterygia;Ctenosquamata;Acanthomorphata;Euacanthomorphacea;Percomorphaceae;Pelagiaria;Scombriformes;Nomeidae;Cubiceps;Cubiceps squamiceps	√	√	√	√	√	√	√	√	×	√	√	×
	Culaea inconstans	NC_011577.1	Vertebrata;Gnathostomata;Teleostomi;Euteleostomi;Actinopterygii;Actinopteri;Neopterygii;Teleostei;Osteoglossocephalai;Clupeocephala;Euteleosteomorpha;Neoteleostei;Eurypterygia;Ctenosquamata;Acanthomorphata;Euacanthomorphacea;Percomorphaceae;Eupercaria;Perciformes;Cottioidei;Gasterosteales;Gasterosteidae;Culaea;Culaea inconstans	√	√	√	√	√	√	√	√	×	√	√	×
	Culter alburnus	KX244762.1	Vertebrata;Gnathostomata;Teleostomi;Euteleostomi;Actinopterygii;Actinopteri;Neopterygii;Teleostei;Osteoglossocephalai;Clupeocephala;Otomorpha;Ostariophysi;Otophysi;Cypriniphysae;Cypriniformes;Cyprinoidei;Xenocyprididae;Xenocypridinae;Culter;Culter alburnus	√	√	√	√	√	√	√	√	√	√	√	×
	Culter alburnus x Ancherythroculter nigrocauda	NC_024645.1	Vertebrata;Gnathostomata;Teleostomi;Euteleostomi;Actinopterygii;Actinopteri;Neopterygii;Teleostei;Osteoglossocephalai;Clupeocephala;Otomorpha;Ostariophysi;Otophysi;Cypriniphysae;Cypriniformes;Cyprinoidei;Cyprinoidei intergeneric hybrids;Culter alburnus x Ancherythroculter nigrocauda	√	√	√	√	√	√	√	√	√	√	√	×
	Culter alburnus x Megalobrama terminalis	MT249227.1	Vertebrata;Gnathostomata;Teleostomi;Euteleostomi;Actinopterygii;Actinopteri;Neopterygii;Teleostei;Osteoglossocephalai;Clupeocephala;Otomorpha;Ostariophysi;Otophysi;Cypriniphysae;Cypriniformes;Cyprinoidei;Xenocyprididae;Xenocypridinae;Xenocypridinae intergeneric hybrids;Culter alburnus x Megalobrama terminalis	√	√	√	√	√	√	√	√	√	√	√	×
	Culter compressocorpus	NC_024183.1	Vertebrata;Gnathostomata;Teleostomi;Euteleostomi;Actinopterygii;Actinopteri;Neopterygii;Teleostei;Osteoglossocephalai;Clupeocephala;Otomorpha;Ostariophysi;Otophysi;Cypriniphysae;Cypriniformes;Cyprinoidei;Xenocyprididae;Xenocypridinae;Culter;Culter compressocorpus	√	√	√	√	√	√	√	√	√	√	√	×
	Culter oxycephaloides	KY404014.1	Vertebrata;Gnathostomata;Teleostomi;Euteleostomi;Actinopterygii;Actinopteri;Neopterygii;Teleostei;Osteoglossocephalai;Clupeocephala;Otomorpha;Ostariophysi;Otophysi;Cypriniphysae;Cypriniformes;Cyprinoidei;Xenocyprididae;Xenocypridinae;Culter;Culter oxycephaloides	√	√	√	√	√	√	√	√	√	√	√	×
	Curimata mivartii	NC_025951.1	Vertebrata;Gnathostomata;Teleostomi;Euteleostomi;Actinopterygii;Actinopteri;Neopterygii;Teleostei;Osteoglossocephalai;Clupeocephala;Otomorpha;Ostariophysi;Otophysi;Characiphysae;Characiformes;Characoidei;Curimatidae;Curimata;Curimata mivartii	√	√	√	√	√	√	√	√	√	√	√	×
	Curimatopsis evelynae	AP011988.1	Vertebrata;Gnathostomata;Teleostomi;Euteleostomi;Actinopterygii;Actinopteri;Neopterygii;Teleostei;Osteoglossocephalai;Clupeocephala;Otomorpha;Ostariophysi;Otophysi;Characiphysae;Characiformes;Characoidei;Curimatidae;Curimatopsis;Curimatopsis evelynae	√	√	√	√	√	√	√	√	√	√	√	×
	Cyathochromis obliquidens	NC_035993.1	Vertebrata;Gnathostomata;Teleostomi;Euteleostomi;Actinopterygii;Actinopteri;Neopterygii;Teleostei;Osteoglossocephalai;Clupeocephala;Euteleosteomorpha;Neoteleostei;Eurypterygia;Ctenosquamata;Acanthomorphata;Euacanthomorphacea;Percomorphaceae;Ovalentaria;Cichlomorphae;Cichliformes;Cichlidae;African cichlids;Pseudocrenilabrinae;Haplochromini;Cyathochromis;Cyathochromis obliquidens	√	√	√	√	√	√	√	√	×	√	√	×
	Cycleptus elongatus	NC_008645.1	Vertebrata;Gnathostomata;Teleostomi;Euteleostomi;Actinopterygii;Actinopteri;Neopterygii;Teleostei;Osteoglossocephalai;Clupeocephala;Otomorpha;Ostariophysi;Otophysi;Cypriniphysae;Cypriniformes;Catostomoidei;Catostomidae;Cycleptus;Cycleptus elongatus	√	√	√	√	√	√	√	√	√	√	√	×
	Cyclocheilichthys enoplos	JQ700301.1	Vertebrata;Gnathostomata;Teleostomi;Euteleostomi;Actinopterygii;Actinopteri;Neopterygii;Teleostei;Osteoglossocephalai;Clupeocephala;Otomorpha;Ostariophysi;Otophysi;Cypriniphysae;Cypriniformes;Cyprinoidei;Cyprinidae;'Poropuntiinae';Cyclocheilichthys;Cyclocheilichthys enoplos	√	√	√	√	√	√	√	√	√	√	√	×
	Cyema atrum	NC_013609.1	Vertebrata;Gnathostomata;Teleostomi;Euteleostomi;Actinopterygii;Actinopteri;Neopterygii;Teleostei;Elopocephalai;Elopocephala;Elopomorpha;Anguilliformes;Cyematidae;Cyema;Cyema atrum	√	√	√	√	√	√	√	√	×	√	√	×
	Cymatogaster aggregata	NC_009059.1	Vertebrata;Gnathostomata;Teleostomi;Euteleostomi;Actinopterygii;Actinopteri;Neopterygii;Teleostei;Osteoglossocephalai;Clupeocephala;Euteleosteomorpha;Neoteleostei;Eurypterygia;Ctenosquamata;Acanthomorphata;Euacanthomorphacea;Percomorphaceae;Ovalentaria;Ovalentaria incertae sedis;Embiotocidae;Cymatogaster;Cymatogaster aggregata	√	√	√	√	√	√	√	√	×	√	√	×
	Cynoglossus abbreviatus	JQ349004.1	Vertebrata;Gnathostomata;Teleostomi;Euteleostomi;Actinopterygii;Actinopteri;Neopterygii;Teleostei;Osteoglossocephalai;Clupeocephala;Euteleosteomorpha;Neoteleostei;Eurypterygia;Ctenosquamata;Acanthomorphata;Euacanthomorphacea;Percomorphaceae;Carangaria;Pleuronectiformes;Pleuronectoidei;Cynoglossidae;Cynoglossinae;Cynoglossus;Cynoglossus abbreviatus	√	√	√	√	√	√	√	√	√	√	√	×
	Cynoglossus bilineatus	NC_023226.1	Vertebrata;Gnathostomata;Teleostomi;Euteleostomi;Actinopterygii;Actinopteri;Neopterygii;Teleostei;Osteoglossocephalai;Clupeocephala;Euteleosteomorpha;Neoteleostei;Eurypterygia;Ctenosquamata;Acanthomorphata;Euacanthomorphacea;Percomorphaceae;Carangaria;Pleuronectiformes;Pleuronectoidei;Cynoglossidae;Cynoglossinae;Cynoglossus;Cynoglossus bilineatus	√	√	√	√	√	√	√	√	√	√	√	×
	Cynoglossus gracilis	KT809367.1	Vertebrata;Gnathostomata;Teleostomi;Euteleostomi;Actinopterygii;Actinopteri;Neopterygii;Teleostei;Osteoglossocephalai;Clupeocephala;Euteleosteomorpha;Neoteleostei;Eurypterygia;Ctenosquamata;Acanthomorphata;Euacanthomorphacea;Percomorphaceae;Carangaria;Pleuronectiformes;Pleuronectoidei;Cynoglossidae;Cynoglossinae;Cynoglossus;Cynoglossus gracilis	√	√	√	√	√	√	√	√	√	√	√	×
	Cynoglossus itinus	NC_023446.1	Vertebrata;Gnathostomata;Teleostomi;Euteleostomi;Actinopterygii;Actinopteri;Neopterygii;Teleostei;Osteoglossocephalai;Clupeocephala;Euteleosteomorpha;Neoteleostei;Eurypterygia;Ctenosquamata;Acanthomorphata;Euacanthomorphacea;Percomorphaceae;Carangaria;Pleuronectiformes;Pleuronectoidei;Cynoglossidae;Cynoglossinae;Cynoglossus;Cynoglossus itinus	√	√	√	√	√	√	√	√	√	√	√	×
	Cynoglossus joyneri	KY008569.1	Vertebrata;Gnathostomata;Teleostomi;Euteleostomi;Actinopterygii;Actinopteri;Neopterygii;Teleostei;Osteoglossocephalai;Clupeocephala;Euteleosteomorpha;Neoteleostei;Eurypterygia;Ctenosquamata;Acanthomorphata;Euacanthomorphacea;Percomorphaceae;Carangaria;Pleuronectiformes;Pleuronectoidei;Cynoglossidae;Cynoglossinae;Cynoglossus;Cynoglossus joyneri	√	√	√	√	×	√	√	√	×	√	√	×
	Cynoglossus nanhaiensis	NC_050921.1	Vertebrata;Gnathostomata;Teleostomi;Euteleostomi;Actinopterygii;Actinopteri;Neopterygii;Teleostei;Osteoglossocephalai;Clupeocephala;Euteleosteomorpha;Neoteleostei;Eurypterygia;Ctenosquamata;Acanthomorphata;Euacanthomorphacea;Percomorphaceae;Carangaria;Pleuronectiformes;Pleuronectoidei;Cynoglossidae;Cynoglossinae;Cynoglossus;Cynoglossus nanhaiensis	√	√	√	√	√	√	√	√	√	√	√	×
	Cynoglossus puncticeps	NC_023229.1	Vertebrata;Gnathostomata;Teleostomi;Euteleostomi;Actinopterygii;Actinopteri;Neopterygii;Teleostei;Osteoglossocephalai;Clupeocephala;Euteleosteomorpha;Neoteleostei;Eurypterygia;Ctenosquamata;Acanthomorphata;Euacanthomorphacea;Percomorphaceae;Carangaria;Pleuronectiformes;Pleuronectoidei;Cynoglossidae;Cynoglossinae;Cynoglossus;Cynoglossus puncticeps	√	√	√	√	√	√	√	√	√	√	√	×
	Cynoglossus roulei	MN966658.1	Vertebrata;Gnathostomata;Teleostomi;Euteleostomi;Actinopterygii;Actinopteri;Neopterygii;Teleostei;Osteoglossocephalai;Clupeocephala;Euteleosteomorpha;Neoteleostei;Eurypterygia;Ctenosquamata;Acanthomorphata;Euacanthomorphacea;Percomorphaceae;Carangaria;Pleuronectiformes;Pleuronectoidei;Cynoglossidae;Cynoglossinae;Cynoglossus;Cynoglossus roulei	√	√	√	√	√	√	√	√	√	√	√	×
	Cynoglossus semilaevis	EU366230.1	Vertebrata;Gnathostomata;Teleostomi;Euteleostomi;Actinopterygii;Actinopteri;Neopterygii;Teleostei;Osteoglossocephalai;Clupeocephala;Euteleosteomorpha;Neoteleostei;Eurypterygia;Ctenosquamata;Acanthomorphata;Euacanthomorphacea;Percomorphaceae;Carangaria;Pleuronectiformes;Pleuronectoidei;Cynoglossidae;Cynoglossinae;Cynoglossus;Cynoglossus semilaevis	√	√	√	√	√	√	√	√	√	√	√	×
	Cynoglossus senegalensis	NC_045034.1	Vertebrata;Gnathostomata;Teleostomi;Euteleostomi;Actinopterygii;Actinopteri;Neopterygii;Teleostei;Osteoglossocephalai;Clupeocephala;Euteleosteomorpha;Neoteleostei;Eurypterygia;Ctenosquamata;Acanthomorphata;Euacanthomorphacea;Percomorphaceae;Carangaria;Pleuronectiformes;Pleuronectoidei;Cynoglossidae;Cynoglossinae;Cynoglossus;Cynoglossus senegalensis	√	√	√	√	√	√	√	√	√	√	√	×
	Cynoglossus sinicus	NC_023224.1	Vertebrata;Gnathostomata;Teleostomi;Euteleostomi;Actinopterygii;Actinopteri;Neopterygii;Teleostei;Osteoglossocephalai;Clupeocephala;Euteleosteomorpha;Neoteleostei;Eurypterygia;Ctenosquamata;Acanthomorphata;Euacanthomorphacea;Percomorphaceae;Carangaria;Pleuronectiformes;Pleuronectoidei;Cynoglossidae;Cynoglossinae;Cynoglossus;Cynoglossus sinicus	√	√	√	√	√	√	√	√	√	√	√	×
	Cynoglossus trigrammus	KP057581.1	Vertebrata;Gnathostomata;Teleostomi;Euteleostomi;Actinopterygii;Actinopteri;Neopterygii;Teleostei;Osteoglossocephalai;Clupeocephala;Euteleosteomorpha;Neoteleostei;Eurypterygia;Ctenosquamata;Acanthomorphata;Euacanthomorphacea;Percomorphaceae;Carangaria;Pleuronectiformes;Pleuronectoidei;Cynoglossidae;Cynoglossinae;Cynoglossus;Cynoglossus trigrammus	√	√	√	×	×	√	√	√	√	√	√	×
	Cynoglossus zanzibarensis	NC_030364.1	Vertebrata;Gnathostomata;Teleostomi;Euteleostomi;Actinopterygii;Actinopteri;Neopterygii;Teleostei;Osteoglossocephalai;Clupeocephala;Euteleosteomorpha;Neoteleostei;Eurypterygia;Ctenosquamata;Acanthomorphata;Euacanthomorphacea;Percomorphaceae;Carangaria;Pleuronectiformes;Pleuronectoidei;Cynoglossidae;Cynoglossinae;Cynoglossus;Cynoglossus zanzibarensis	√	√	√	√	√	√	√	√	√	√	√	×
	Cynoponticus ferox	NC_013617.1	Vertebrata;Gnathostomata;Teleostomi;Euteleostomi;Actinopterygii;Actinopteri;Neopterygii;Teleostei;Elopocephalai;Elopocephala;Elopomorpha;Anguilliformes;Muraenesocidae;Cynoponticus;Cynoponticus ferox	√	√	√	√	×	√	√	√	×	√	√	×
	Cynotilapia afra	NC_018564.1	Vertebrata;Gnathostomata;Teleostomi;Euteleostomi;Actinopterygii;Actinopteri;Neopterygii;Teleostei;Osteoglossocephalai;Clupeocephala;Euteleosteomorpha;Neoteleostei;Eurypterygia;Ctenosquamata;Acanthomorphata;Euacanthomorphacea;Percomorphaceae;Ovalentaria;Cichlomorphae;Cichliformes;Cichlidae;African cichlids;Pseudocrenilabrinae;Haplochromini;Cynotilapia;Cynotilapia afra	√	√	√	√	√	√	√	√	×	√	√	×
	Cyphomyrus discorhynchus	NC_015105.1	Vertebrata;Gnathostomata;Teleostomi;Euteleostomi;Actinopterygii;Actinopteri;Neopterygii;Teleostei;Osteoglossocephalai;Osteoglossocephala;Osteoglossomorpha;Osteoglossiformes;Mormyridae;Cyphomyrus;Cyphomyrus discorhynchus	√	√	√	√	√	√	√	√	√	√	×	×
	Cyprinella leedsi	MH324418.1	Vertebrata;Gnathostomata;Teleostomi;Euteleostomi;Actinopterygii;Actinopteri;Neopterygii;Teleostei;Osteoglossocephalai;Clupeocephala;Otomorpha;Ostariophysi;Otophysi;Cypriniphysae;Cypriniformes;Cyprinoidei;Leuciscidae;Pogonichthyinae;Cyprinella;Cyprinella leedsi	√	√	√	√	√	√	√	√	√	√	√	×
	Cyprinella lutrensis	NC_008643.1	Vertebrata;Gnathostomata;Teleostomi;Euteleostomi;Actinopterygii;Actinopteri;Neopterygii;Teleostei;Osteoglossocephalai;Clupeocephala;Otomorpha;Ostariophysi;Otophysi;Cypriniphysae;Cypriniformes;Cyprinoidei;Leuciscidae;Pogonichthyinae;Cyprinella;Cyprinella lutrensis	√	√	√	√	√	√	√	√	√	√	√	×
	Cyprinella spiloptera	DQ536422.1	Vertebrata;Gnathostomata;Teleostomi;Euteleostomi;Actinopterygii;Actinopteri;Neopterygii;Teleostei;Osteoglossocephalai;Clupeocephala;Otomorpha;Ostariophysi;Otophysi;Cypriniphysae;Cypriniformes;Cyprinoidei;Leuciscidae;Pogonichthyinae;Cyprinella;Cyprinella spiloptera	√	√	√	√	√	√	√	√	√	√	√	×
	Cyprinion semiplotum	MN603795.1	Vertebrata;Gnathostomata;Teleostomi;Euteleostomi;Actinopterygii;Actinopteri;Neopterygii;Teleostei;Osteoglossocephalai;Clupeocephala;Otomorpha;Ostariophysi;Otophysi;Cypriniphysae;Cypriniformes;Cyprinoidei;Cyprinidae;Barbinae;Cyprinion;Cyprinion semiplotum	√	√	√	√	√	√	√	√	√	√	√	×
	Cyprinodon diabolis	KX061747.1	Vertebrata;Gnathostomata;Teleostomi;Euteleostomi;Actinopterygii;Actinopteri;Neopterygii;Teleostei;Osteoglossocephalai;Clupeocephala;Euteleosteomorpha;Neoteleostei;Eurypterygia;Ctenosquamata;Acanthomorphata;Euacanthomorphacea;Percomorphaceae;Ovalentaria;Atherinomorphae;Cyprinodontiformes;Cyprinodontoidei;Cyprinodontidae;Cyprinodontinae;Cyprinodontini;Cyprinodon;Cyprinodon diabolis	√	√	√	√	√	√	√	√	×	√	√	×
	Cyprinodon nevadensis amargosae	KU883631.1	Vertebrata;Gnathostomata;Teleostomi;Euteleostomi;Actinopterygii;Actinopteri;Neopterygii;Teleostei;Osteoglossocephalai;Clupeocephala;Euteleosteomorpha;Neoteleostei;Eurypterygia;Ctenosquamata;Acanthomorphata;Euacanthomorphacea;Percomorphaceae;Ovalentaria;Atherinomorphae;Cyprinodontiformes;Cyprinodontoidei;Cyprinodontidae;Cyprinodontinae;Cyprinodontini;Cyprinodon;Cyprinodon nevadensis;Cyprinodon nev…	√	√	√	√	√	√	√	√	×	√	√	×
	Cyprinodon nevadensis pectoralis	KP064222.1	Vertebrata;Gnathostomata;Teleostomi;Euteleostomi;Actinopterygii;Actinopteri;Neopterygii;Teleostei;Osteoglossocephalai;Clupeocephala;Euteleosteomorpha;Neoteleostei;Eurypterygia;Ctenosquamata;Acanthomorphata;Euacanthomorphacea;Percomorphaceae;Ovalentaria;Atherinomorphae;Cyprinodontiformes;Cyprinodontoidei;Cyprinodontidae;Cyprinodontinae;Cyprinodontini;Cyprinodon;Cyprinodon nevadensis;Cyprinodon nev…	√	√	√	√	√	√	√	√	×	√	√	×
	Cyprinodon rubrofluviatilis	EF442803.2	Vertebrata;Gnathostomata;Teleostomi;Euteleostomi;Actinopterygii;Actinopteri;Neopterygii;Teleostei;Osteoglossocephalai;Clupeocephala;Euteleosteomorpha;Neoteleostei;Eurypterygia;Ctenosquamata;Acanthomorphata;Euacanthomorphacea;Percomorphaceae;Ovalentaria;Atherinomorphae;Cyprinodontiformes;Cyprinodontoidei;Cyprinodontidae;Cyprinodontinae;Cyprinodontini;Cyprinodon;Cyprinodon rubrofluviatilis	√	√	√	√	√	√	√	√	×	√	√	×
	Cyprinodon tularosa	NC_028292.1	Vertebrata;Gnathostomata;Teleostomi;Euteleostomi;Actinopterygii;Actinopteri;Neopterygii;Teleostei;Osteoglossocephalai;Clupeocephala;Euteleosteomorpha;Neoteleostei;Eurypterygia;Ctenosquamata;Acanthomorphata;Euacanthomorphacea;Percomorphaceae;Ovalentaria;Atherinomorphae;Cyprinodontiformes;Cyprinodontoidei;Cyprinodontidae;Cyprinodontinae;Cyprinodontini;Cyprinodon;Cyprinodon tularosa	√	√	√	√	√	√	√	√	×	√	√	×
	Cyprinodon variegatus	NC_028088.1	Vertebrata;Gnathostomata;Teleostomi;Euteleostomi;Actinopterygii;Actinopteri;Neopterygii;Teleostei;Osteoglossocephalai;Clupeocephala;Euteleosteomorpha;Neoteleostei;Eurypterygia;Ctenosquamata;Acanthomorphata;Euacanthomorphacea;Percomorphaceae;Ovalentaria;Atherinomorphae;Cyprinodontiformes;Cyprinodontoidei;Cyprinodontidae;Cyprinodontinae;Cyprinodontini;Cyprinodon;Cyprinodon variegatus	√	√	√	√	√	√	√	√	×	√	√	×
	Cyprinodon variegatus variegatus	KR061357.1	Vertebrata;Gnathostomata;Teleostomi;Euteleostomi;Actinopterygii;Actinopteri;Neopterygii;Teleostei;Osteoglossocephalai;Clupeocephala;Euteleosteomorpha;Neoteleostei;Eurypterygia;Ctenosquamata;Acanthomorphata;Euacanthomorphacea;Percomorphaceae;Ovalentaria;Atherinomorphae;Cyprinodontiformes;Cyprinodontoidei;Cyprinodontidae;Cyprinodontinae;Cyprinodontini;Cyprinodon;Cyprinodon variegatus;Cyprinodon var…	√	√	√	√	√	√	√	√	×	√	√	×
	Cyprinus acutidorsalis	NC_028418.1	Vertebrata;Gnathostomata;Teleostomi;Euteleostomi;Actinopterygii;Actinopteri;Neopterygii;Teleostei;Osteoglossocephalai;Clupeocephala;Otomorpha;Ostariophysi;Otophysi;Cypriniphysae;Cypriniformes;Cyprinoidei;Cyprinidae;Cyprininae;Cyprinus;Cyprinus acutidorsalis	√	√	√	√	√	√	√	√	√	√	√	×
	Cyprinus carpio	MG570435.1	Vertebrata;Gnathostomata;Teleostomi;Euteleostomi;Actinopterygii;Actinopteri;Neopterygii;Teleostei;Osteoglossocephalai;Clupeocephala;Otomorpha;Ostariophysi;Otophysi;Cypriniphysae;Cypriniformes;Cyprinoidei;Cyprinidae;Cyprininae;Cyprinus;Cyprinus carpio	√	√	√	√	√	√	√	√	√	√	√	×
	Cyprinus carpio (triploid)	MK134852.1	Vertebrata;Gnathostomata;Teleostomi;Euteleostomi;Actinopterygii;Actinopteri;Neopterygii;Teleostei;Osteoglossocephalai;Clupeocephala;Otomorpha;Ostariophysi;Otophysi;Cypriniphysae;Cypriniformes;Cyprinoidei;Cyprinidae;Cyprininae;Cyprinus;Cyprinus carpio;Cyprinus carpio (triploid)	√	√	√	√	√	√	√	√	√	√	×	×
	Cyprinus carpio carpio	KU146529.1	Vertebrata;Gnathostomata;Teleostomi;Euteleostomi;Actinopterygii;Actinopteri;Neopterygii;Teleostei;Osteoglossocephalai;Clupeocephala;Otomorpha;Ostariophysi;Otophysi;Cypriniphysae;Cypriniformes;Cyprinoidei;Cyprinidae;Cyprininae;Cyprinus;Cyprinus carpio;Cyprinus carpio carpio	√	√	√	√	√	√	√	√	√	√	√	×
	Cyprinus carpio 'color'	NC_018366.1	Vertebrata;Gnathostomata;Teleostomi;Euteleostomi;Actinopterygii;Actinopteri;Neopterygii;Teleostei;Osteoglossocephalai;Clupeocephala;Otomorpha;Ostariophysi;Otophysi;Cypriniphysae;Cypriniformes;Cyprinoidei;Cyprinidae;Cyprininae;Cyprinus;Cyprinus carpio;Cyprinus carpio 'color'	√	√	√	√	√	√	√	√	√	√	√	×
	Cyprinus carpio 'Furong' x Carassius auratus red var.	NC_026543.1	Vertebrata;Gnathostomata;Teleostomi;Euteleostomi;Actinopterygii;Actinopteri;Neopterygii;Teleostei;Osteoglossocephalai;Clupeocephala;Otomorpha;Ostariophysi;Otophysi;Cypriniphysae;Cypriniformes;Cyprinoidei;Cyprinoidei intergeneric hybrids;Cyprinus carpio 'Furong' x Carassius auratus red var.	√	√	√	√	√	√	√	√	√	√	√	×
	Cyprinus carpio 'Guilin'	MK291479.1	Vertebrata;Gnathostomata;Teleostomi;Euteleostomi;Actinopterygii;Actinopteri;Neopterygii;Teleostei;Osteoglossocephalai;Clupeocephala;Otomorpha;Ostariophysi;Otophysi;Cypriniphysae;Cypriniformes;Cyprinoidei;Cyprinidae;Cyprininae;Cyprinus;Cyprinus carpio;Cyprinus carpio 'Guilin'	√	√	√	√	√	√	√	√	√	√	√	×
	Cyprinus carpio haematopterus	JN105354.1	Vertebrata;Gnathostomata;Teleostomi;Euteleostomi;Actinopterygii;Actinopteri;Neopterygii;Teleostei;Osteoglossocephalai;Clupeocephala;Otomorpha;Ostariophysi;Otophysi;Cypriniphysae;Cypriniformes;Cyprinoidei;Cyprinidae;Cyprininae;Cyprinus;Cyprinus carpio;Cyprinus carpio haematopterus	√	√	√	√	√	√	√	√	√	√	√	×
	Cyprinus carpio haematopterus x Megalobrama amblycephala	MK726305.1	Vertebrata;Gnathostomata;Teleostomi;Euteleostomi;Actinopterygii;Actinopteri;Neopterygii;Teleostei;Osteoglossocephalai;Clupeocephala;Otomorpha;Ostariophysi;Otophysi;Cypriniphysae;Cypriniformes;Cyprinoidei;Cyprinoidei intergeneric hybrids;Cyprinus carpio haematopterus x Megalobrama amblycephala	√	√	√	√	√	√	√	√	√	√	√	×
	Cyprinus carpio 'koi'	KJ511882.1	Vertebrata;Gnathostomata;Teleostomi;Euteleostomi;Actinopterygii;Actinopteri;Neopterygii;Teleostei;Osteoglossocephalai;Clupeocephala;Otomorpha;Ostariophysi;Otophysi;Cypriniphysae;Cypriniformes;Cyprinoidei;Cyprinidae;Cyprininae;Cyprinus;Cyprinus carpio;Cyprinus carpio 'koi'	√	√	√	√	√	√	√	√	√	√	√	×
	Cyprinus carpio 'longfin'	KF932266.1	Vertebrata;Gnathostomata;Teleostomi;Euteleostomi;Actinopterygii;Actinopteri;Neopterygii;Teleostei;Osteoglossocephalai;Clupeocephala;Otomorpha;Ostariophysi;Otophysi;Cypriniphysae;Cypriniformes;Cyprinoidei;Cyprinidae;Cyprininae;Cyprinus;Cyprinus carpio;Cyprinus carpio 'longfin'	√	√	√	√	√	√	√	√	√	√	√	×
	Cyprinus carpio 'mirror' x Cyprinus carpio 'singuonensis'	NC_031808.1	Vertebrata;Gnathostomata;Teleostomi;Euteleostomi;Actinopterygii;Actinopteri;Neopterygii;Teleostei;Osteoglossocephalai;Clupeocephala;Otomorpha;Ostariophysi;Otophysi;Cypriniphysae;Cypriniformes;Cyprinoidei;Cyprinoidei intergeneric hybrids;Cyprinus carpio 'mirror' x Cyprinus carpio 'singuonensis'	√	√	√	√	√	√	√	√	√	√	√	×
	Cyprinus carpio 'mirror' x Cyprinus carpio 'singuonensis' x Carassius auratus red var.	NC_031807.1	Vertebrata;Gnathostomata;Teleostomi;Euteleostomi;Actinopterygii;Actinopteri;Neopterygii;Teleostei;Osteoglossocephalai;Clupeocephala;Otomorpha;Ostariophysi;Otophysi;Cypriniphysae;Cypriniformes;Cyprinoidei;Cyprinoidei intergeneric hybrids;(Cyprinus carpio 'mirror' x Cyprinus carpio 'singuonensis') x Carassius auratus red var.	√	√	√	√	√	√	√	√	√	√	√	×
	Cyprinus carpio nudus	KU301745.1	Vertebrata;Gnathostomata;Teleostomi;Euteleostomi;Actinopterygii;Actinopteri;Neopterygii;Teleostei;Osteoglossocephalai;Clupeocephala;Otomorpha;Ostariophysi;Otophysi;Cypriniphysae;Cypriniformes;Cyprinoidei;Cyprinidae;Cyprininae;Cyprinus;Cyprinus carpio;Cyprinus carpio nudus	√	√	√	√	√	√	√	√	√	√	√	×
	Cyprinus carpio specularis x Carassius cuvieri	NC_026870.1	Vertebrata;Gnathostomata;Teleostomi;Euteleostomi;Actinopterygii;Actinopteri;Neopterygii;Teleostei;Osteoglossocephalai;Clupeocephala;Otomorpha;Ostariophysi;Otophysi;Cypriniphysae;Cypriniformes;Cyprinoidei;Cyprinoidei intergeneric hybrids;Cyprinus carpio specularis x Carassius cuvieri	√	√	√	√	√	√	√	√	√	√	√	×
	Cyprinus carpio var. baisenensis	MT780875.1	Vertebrata;Gnathostomata;Teleostomi;Euteleostomi;Actinopterygii;Actinopteri;Neopterygii;Teleostei;Osteoglossocephalai;Clupeocephala;Otomorpha;Ostariophysi;Otophysi;Cypriniphysae;Cypriniformes;Cyprinoidei;Cyprinidae;Cyprininae;Cyprinus;Cyprinus carpio;Cyprinus carpio var. baisenensis	√	√	√	√	√	√	√	√	√	√	√	×
	Cyprinus carpio 'wananensis'	KF856964.1	Vertebrata;Gnathostomata;Teleostomi;Euteleostomi;Actinopterygii;Actinopteri;Neopterygii;Teleostei;Osteoglossocephalai;Clupeocephala;Otomorpha;Ostariophysi;Otophysi;Cypriniphysae;Cypriniformes;Cyprinoidei;Cyprinidae;Cyprininae;Cyprinus;Cyprinus carpio;Cyprinus carpio 'wananensis'	√	√	√	√	√	√	√	√	√	√	√	×
	Cyprinus carpio 'wuyuanensis'	JN105357.1	Vertebrata;Gnathostomata;Teleostomi;Euteleostomi;Actinopterygii;Actinopteri;Neopterygii;Teleostei;Osteoglossocephalai;Clupeocephala;Otomorpha;Ostariophysi;Otophysi;Cypriniphysae;Cypriniformes;Cyprinoidei;Cyprinidae;Cyprininae;Cyprinus;Cyprinus carpio;Cyprinus carpio 'wuyuanensis'	√	√	√	√	√	√	√	√	√	√	√	×
	Cyprinus carpio wuyuanensis x Carassius auratus	NC_018038.1	Vertebrata;Gnathostomata;Teleostomi;Euteleostomi;Actinopterygii;Actinopteri;Neopterygii;Teleostei;Osteoglossocephalai;Clupeocephala;Otomorpha;Ostariophysi;Otophysi;Cypriniphysae;Cypriniformes;Cyprinoidei;Cyprinoidei intergeneric hybrids;Cyprinus carpio wuyuanensis x Carassius auratus	√	√	√	√	√	√	√	√	√	√	√	×
	Cyprinus carpio x Megalobrama amblycephala	NC_042402.1	Vertebrata;Gnathostomata;Teleostomi;Euteleostomi;Actinopterygii;Actinopteri;Neopterygii;Teleostei;Osteoglossocephalai;Clupeocephala;Otomorpha;Ostariophysi;Otophysi;Cypriniphysae;Cypriniformes;Cyprinoidei;Cyprinoidei intergeneric hybrids;Cyprinus carpio x Megalobrama amblycephala	√	√	√	√	√	√	√	√	√	×	√	×
	Cyprinus carpio 'xingguonensis'	KU146530.1	Vertebrata;Gnathostomata;Teleostomi;Euteleostomi;Actinopterygii;Actinopteri;Neopterygii;Teleostei;Osteoglossocephalai;Clupeocephala;Otomorpha;Ostariophysi;Otophysi;Cypriniphysae;Cypriniformes;Cyprinoidei;Cyprinidae;Cyprininae;Cyprinus;Cyprinus carpio;Cyprinus carpio 'xingguonensis'	√	√	√	√	√	√	√	√	√	√	√	×
	Cyprinus carpio 'Ying hybrid'	KX710076.1	Vertebrata;Gnathostomata;Teleostomi;Euteleostomi;Actinopterygii;Actinopteri;Neopterygii;Teleostei;Osteoglossocephalai;Clupeocephala;Otomorpha;Ostariophysi;Otophysi;Cypriniphysae;Cypriniformes;Cyprinoidei;Cyprinidae;Cyprininae;Cyprinus;Cyprinus carpio;Cyprinus carpio 'Ying hybrid'	√	√	√	√	√	√	√	√	√	√	√	×
	Cyprinus megalophthalmus	NC_028417.1	Vertebrata;Gnathostomata;Teleostomi;Euteleostomi;Actinopterygii;Actinopteri;Neopterygii;Teleostei;Osteoglossocephalai;Clupeocephala;Otomorpha;Ostariophysi;Otophysi;Cypriniphysae;Cypriniformes;Cyprinoidei;Cyprinidae;Cyprininae;Cyprinus;Cyprinus megalophthalmus	√	√	√	√	√	√	√	√	√	√	√	×
	Cyprinus multitaeniata	KU373073.1	Vertebrata;Gnathostomata;Teleostomi;Euteleostomi;Actinopterygii;Actinopteri;Neopterygii;Teleostei;Osteoglossocephalai;Clupeocephala;Otomorpha;Ostariophysi;Otophysi;Cypriniphysae;Cypriniformes;Cyprinoidei;Cyprinidae;Cyprininae;Cyprinus;Cyprinus multitaeniata	√	√	√	√	√	√	√	√	√	√	×	×
	Cypselurus hiraii	NC_007403.1	Vertebrata;Gnathostomata;Teleostomi;Euteleostomi;Actinopterygii;Actinopteri;Neopterygii;Teleostei;Osteoglossocephalai;Clupeocephala;Euteleosteomorpha;Neoteleostei;Eurypterygia;Ctenosquamata;Acanthomorphata;Euacanthomorphacea;Percomorphaceae;Ovalentaria;Atherinomorphae;Beloniformes;Belonoidei;Exocoetidae;Cypselurus;Cypselurus hiraii	√	√	√	√	√	√	√	√	×	√	√	×
	Dactyloptena orientalis	NC_024189.1	Vertebrata;Gnathostomata;Teleostomi;Euteleostomi;Actinopterygii;Actinopteri;Neopterygii;Teleostei;Osteoglossocephalai;Clupeocephala;Euteleosteomorpha;Neoteleostei;Eurypterygia;Ctenosquamata;Acanthomorphata;Euacanthomorphacea;Percomorphaceae;Syngnathiaria;Syngnathiformes;Dactylopteroidei;Dactylopteridae;Dactyloptena;Dactyloptena orientalis	√	√	√	√	√	√	√	√	×	√	×	×
	Dactyloptena peterseni	NC_003194.1	Vertebrata;Gnathostomata;Teleostomi;Euteleostomi;Actinopterygii;Actinopteri;Neopterygii;Teleostei;Osteoglossocephalai;Clupeocephala;Euteleosteomorpha;Neoteleostei;Eurypterygia;Ctenosquamata;Acanthomorphata;Euacanthomorphacea;Percomorphaceae;Syngnathiaria;Syngnathiformes;Dactylopteroidei;Dactylopteridae;Dactyloptena;Dactyloptena peterseni	√	√	√	√	√	√	√	√	×	√	√	×
	Dactyloptena tiltoni	NC_004402.1	Vertebrata;Gnathostomata;Teleostomi;Euteleostomi;Actinopterygii;Actinopteri;Neopterygii;Teleostei;Osteoglossocephalai;Clupeocephala;Euteleosteomorpha;Neoteleostei;Eurypterygia;Ctenosquamata;Acanthomorphata;Euacanthomorphacea;Percomorphaceae;Syngnathiaria;Syngnathiformes;Dactylopteroidei;Dactylopteridae;Dactyloptena;Dactyloptena tiltoni	√	√	√	√	×	√	√	√	×	√	√	×
	Dallia pectoralis	NC_004592.1	Vertebrata;Gnathostomata;Teleostomi;Euteleostomi;Actinopterygii;Actinopteri;Neopterygii;Teleostei;Osteoglossocephalai;Clupeocephala;Euteleosteomorpha;Protacanthopterygii;Esociformes;Umbridae;Dallia;Dallia pectoralis	√	√	√	√	√	√	√	√	×	√	×	×
	Danacetichthys galathenus	NC_003185.1	Vertebrata;Gnathostomata;Teleostomi;Euteleostomi;Actinopterygii;Actinopteri;Neopterygii;Teleostei;Osteoglossocephalai;Clupeocephala;Euteleosteomorpha;Neoteleostei;Eurypterygia;Ctenosquamata;Acanthomorphata;Euacanthomorphacea;Berycimorphaceae;Beryciformes;Cetomimidae;Danacetichthys;Danacetichthys galathenus	√	√	√	√	√	√	√	√	√	√	√	×
	Danio albolineatus	NC_029771.1	Vertebrata;Gnathostomata;Teleostomi;Euteleostomi;Actinopterygii;Actinopteri;Neopterygii;Teleostei;Osteoglossocephalai;Clupeocephala;Otomorpha;Ostariophysi;Otophysi;Cypriniphysae;Cypriniformes;Cyprinoidei;Danionidae;Danioninae;Danio;Danio albolineatus	×	√	×	√	×	×	×	×	×	√	√	×
	Danio dangila	NC_015525.1	Vertebrata;Gnathostomata;Teleostomi;Euteleostomi;Actinopterygii;Actinopteri;Neopterygii;Teleostei;Osteoglossocephalai;Clupeocephala;Otomorpha;Ostariophysi;Otophysi;Cypriniphysae;Cypriniformes;Cyprinoidei;Danionidae;Danioninae;Danio;Danio dangila	√	√	√	√	√	√	√	√	√	√	√	×
	Danio margaritatus	NC_028526.1	Vertebrata;Gnathostomata;Teleostomi;Euteleostomi;Actinopterygii;Actinopteri;Neopterygii;Teleostei;Osteoglossocephalai;Clupeocephala;Otomorpha;Ostariophysi;Otophysi;Cypriniphysae;Cypriniformes;Cyprinoidei;Danionidae;Danioninae;Danio;Danio margaritatus	×	×	×	×	×	×	×	×	×	√	√	×
	Danio nigrofasciatus	NC_027688.1	Vertebrata;Gnathostomata;Teleostomi;Euteleostomi;Actinopterygii;Actinopteri;Neopterygii;Teleostei;Osteoglossocephalai;Clupeocephala;Otomorpha;Ostariophysi;Otophysi;Cypriniphysae;Cypriniformes;Cyprinoidei;Danionidae;Danioninae;Danio;Danio nigrofasciatus	√	√	√	√	√	√	√	√	√	√	√	×
	Danio rerio	NC_002333.2	Vertebrata;Gnathostomata;Teleostomi;Euteleostomi;Actinopterygii;Actinopteri;Neopterygii;Teleostei;Osteoglossocephalai;Clupeocephala;Otomorpha;Ostariophysi;Otophysi;Cypriniphysae;Cypriniformes;Cyprinoidei;Danionidae;Danioninae;Danio;Danio rerio	√	√	√	√	√	√	√	√	√	√	√	×
	Danionella mirifica	AP011424.1	Vertebrata;Gnathostomata;Teleostomi;Euteleostomi;Actinopterygii;Actinopteri;Neopterygii;Teleostei;Osteoglossocephalai;Clupeocephala;Otomorpha;Ostariophysi;Otophysi;Cypriniphysae;Cypriniformes;Cyprinoidei;Danionidae;Danioninae;Danionella;Danionella mirifica	√	√	√	√	×	√	√	√	×	√	×	×
	Dario dario	MT344964.1	Vertebrata;Gnathostomata;Teleostomi;Euteleostomi;Actinopterygii;Actinopteri;Neopterygii;Teleostei;Osteoglossocephalai;Clupeocephala;Euteleosteomorpha;Neoteleostei;Eurypterygia;Ctenosquamata;Acanthomorphata;Euacanthomorphacea;Percomorphaceae;Anabantaria;Anabantiformes;Nandoidei;Badidae;Dario;Dario dario	√	√	√	√	√	√	√	√	×	√	√	×
	Datnioides microlepis	NC_030278.1	Vertebrata;Gnathostomata;Teleostomi;Euteleostomi;Actinopterygii;Actinopteri;Neopterygii;Teleostei;Osteoglossocephalai;Clupeocephala;Euteleosteomorpha;Neoteleostei;Eurypterygia;Ctenosquamata;Acanthomorphata;Euacanthomorphacea;Percomorphaceae;Eupercaria;Lobotiformes;Datnioididae;Datnioides;Datnioides microlepis	√	√	√	√	√	√	√	√	×	√	×	×
	Datnioides undecimradiatus	NC_030259.1	Vertebrata;Gnathostomata;Teleostomi;Euteleostomi;Actinopterygii;Actinopteri;Neopterygii;Teleostei;Osteoglossocephalai;Clupeocephala;Euteleosteomorpha;Neoteleostei;Eurypterygia;Ctenosquamata;Acanthomorphata;Euacanthomorphacea;Percomorphaceae;Eupercaria;Lobotiformes;Datnioididae;Datnioides;Datnioides undecimradiatus	√	√	√	√	√	√	√	√	×	√	√	×
	Decapterus macarellus	NC_026718.1	Vertebrata;Gnathostomata;Teleostomi;Euteleostomi;Actinopterygii;Actinopteri;Neopterygii;Teleostei;Osteoglossocephalai;Clupeocephala;Euteleosteomorpha;Neoteleostei;Eurypterygia;Ctenosquamata;Acanthomorphata;Euacanthomorphacea;Percomorphaceae;Carangaria;Carangiformes;Carangidae;Decapterus;Decapterus macarellus	√	√	√	√	√	√	√	√	×	√	√	×
	Decapterus macrosoma	NC_023458.1	Vertebrata;Gnathostomata;Teleostomi;Euteleostomi;Actinopterygii;Actinopteri;Neopterygii;Teleostei;Osteoglossocephalai;Clupeocephala;Euteleosteomorpha;Neoteleostei;Eurypterygia;Ctenosquamata;Acanthomorphata;Euacanthomorphacea;Percomorphaceae;Carangaria;Carangiformes;Carangidae;Decapterus;Decapterus macrosoma	√	√	√	√	√	√	√	√	×	√	√	×
	Decapterus maruadsi	NC_024556.1	Vertebrata;Gnathostomata;Teleostomi;Euteleostomi;Actinopterygii;Actinopteri;Neopterygii;Teleostei;Osteoglossocephalai;Clupeocephala;Euteleosteomorpha;Neoteleostei;Eurypterygia;Ctenosquamata;Acanthomorphata;Euacanthomorphacea;Percomorphaceae;Carangaria;Carangiformes;Carangidae;Decapterus;Decapterus maruadsi	√	√	√	√	√	√	√	√	×	√	√	×
	Decapterus tabl	NC_044650.1	Vertebrata;Gnathostomata;Teleostomi;Euteleostomi;Actinopterygii;Actinopteri;Neopterygii;Teleostei;Osteoglossocephalai;Clupeocephala;Euteleosteomorpha;Neoteleostei;Eurypterygia;Ctenosquamata;Acanthomorphata;Euacanthomorphacea;Percomorphaceae;Carangaria;Carangiformes;Carangidae;Decapterus;Decapterus tabl	√	√	√	√	√	√	√	√	×	√	√	×
	Dendrophysa russelii	NC_017606.1	Vertebrata;Gnathostomata;Teleostomi;Euteleostomi;Actinopterygii;Actinopteri;Neopterygii;Teleostei;Osteoglossocephalai;Clupeocephala;Euteleosteomorpha;Neoteleostei;Eurypterygia;Ctenosquamata;Acanthomorphata;Euacanthomorphacea;Percomorphaceae;Eupercaria;Eupercaria incertae sedis;Sciaenidae;Dendrophysa;Dendrophysa russelii	√	√	√	√	√	√	√	√	×	√	×	×
	Dentex angolensis	NC_044097.1	Vertebrata;Gnathostomata;Teleostomi;Euteleostomi;Actinopterygii;Actinopteri;Neopterygii;Teleostei;Osteoglossocephalai;Clupeocephala;Euteleosteomorpha;Neoteleostei;Eurypterygia;Ctenosquamata;Acanthomorphata;Euacanthomorphacea;Percomorphaceae;Eupercaria;Spariformes;Sparidae;Dentex;Dentex angolensis	√	√	√	√	√	√	√	√	×	√	√	×
	Dentex dentex	NC_037755.1	Vertebrata;Gnathostomata;Teleostomi;Euteleostomi;Actinopterygii;Actinopteri;Neopterygii;Teleostei;Osteoglossocephalai;Clupeocephala;Euteleosteomorpha;Neoteleostei;Eurypterygia;Ctenosquamata;Acanthomorphata;Euacanthomorphacea;Percomorphaceae;Eupercaria;Spariformes;Sparidae;Dentex;Dentex dentex	√	√	√	√	√	√	√	√	×	√	√	×
	Dentex gibbosus	NC_037731.1	Vertebrata;Gnathostomata;Teleostomi;Euteleostomi;Actinopterygii;Actinopteri;Neopterygii;Teleostei;Osteoglossocephalai;Clupeocephala;Euteleosteomorpha;Neoteleostei;Eurypterygia;Ctenosquamata;Acanthomorphata;Euacanthomorphacea;Percomorphaceae;Eupercaria;Spariformes;Sparidae;Dentex;Dentex gibbosus	√	√	√	√	√	√	√	√	×	√	√	×
	Dentex hypselosomus	NC_049151.1	Vertebrata;Gnathostomata;Teleostomi;Euteleostomi;Actinopterygii;Actinopteri;Neopterygii;Teleostei;Osteoglossocephalai;Clupeocephala;Euteleosteomorpha;Neoteleostei;Eurypterygia;Ctenosquamata;Acanthomorphata;Euacanthomorphacea;Percomorphaceae;Eupercaria;Spariformes;Sparidae;Dentex;Dentex hypselosomus	√	√	√	√	√	√	√	√	×	√	√	×
	Dentex tumifrons	NC_029479.1	Vertebrata;Gnathostomata;Teleostomi;Euteleostomi;Actinopterygii;Actinopteri;Neopterygii;Teleostei;Osteoglossocephalai;Clupeocephala;Euteleosteomorpha;Neoteleostei;Eurypterygia;Ctenosquamata;Acanthomorphata;Euacanthomorphacea;Percomorphaceae;Eupercaria;Spariformes;Sparidae;Evynnis;Evynnis tumifrons	√	√	√	√	√	√	√	√	×	√	√	×
	Denticeps clupeoides	NC_007889.1	Vertebrata;Gnathostomata;Teleostomi;Euteleostomi;Actinopterygii;Actinopteri;Neopterygii;Teleostei;Osteoglossocephalai;Clupeocephala;Otomorpha;Clupei;Clupeiformes;Denticipitoidei;Denticipitidae;Denticeps;Denticeps clupeoides	√	√	√	√	√	√	√	√	√	√	√	×
	Derichthys serpentinus	NC_013611.1	Vertebrata;Gnathostomata;Teleostomi;Euteleostomi;Actinopterygii;Actinopteri;Neopterygii;Teleostei;Elopocephalai;Elopocephala;Elopomorpha;Anguilliformes;Derichthyidae;Derichthys;Derichthys serpentinus	√	√	√	√	√	√	√	√	×	√	×	×
	Dermogenys pusilla	MK034755.1	Vertebrata;Gnathostomata;Teleostomi;Euteleostomi;Actinopterygii;Actinopteri;Neopterygii;Teleostei;Osteoglossocephalai;Clupeocephala;Euteleosteomorpha;Neoteleostei;Eurypterygia;Ctenosquamata;Acanthomorphata;Euacanthomorphacea;Percomorphaceae;Ovalentaria;Atherinomorphae;Beloniformes;Belonoidei;Zenarchopteridae;Dermogenys;Dermogenys pusilla	√	√	√	√	√	√	√	√	×	√	√	×
	Deuterodon giton	NC_044970.1	Vertebrata;Gnathostomata;Teleostomi;Euteleostomi;Actinopterygii;Actinopteri;Neopterygii;Teleostei;Osteoglossocephalai;Clupeocephala;Otomorpha;Ostariophysi;Otophysi;Characiphysae;Characiformes;Characoidei;Characidae;Stevardiinae;Deuterodon;Deuterodon giton	√	√	√	√	√	√	√	√	×	√	√	×
	Devario chrysotaeniatus	KP407138.1	Vertebrata;Gnathostomata;Teleostomi;Euteleostomi;Actinopterygii;Actinopteri;Neopterygii;Teleostei;Osteoglossocephalai;Clupeocephala;Otomorpha;Ostariophysi;Otophysi;Cypriniphysae;Cypriniformes;Cyprinoidei;Danionidae;Danioninae;Devario;Devario chrysotaeniatus	√	√	×	√	√	√	√	√	×	√	√	×
	Devario laoensis	NC_026122.1	Vertebrata;Gnathostomata;Teleostomi;Euteleostomi;Actinopterygii;Actinopteri;Neopterygii;Teleostei;Osteoglossocephalai;Clupeocephala;Otomorpha;Ostariophysi;Otophysi;Cypriniphysae;Cypriniformes;Cyprinoidei;Danionidae;Danioninae;Devario;Devario laoensis	√	√	√	√	√	√	√	√	×	√	√	×
	Diagramma picta	NC_009856.1	Vertebrata;Gnathostomata;Teleostomi;Euteleostomi;Actinopterygii;Actinopteri;Neopterygii;Teleostei;Osteoglossocephalai;Clupeocephala;Euteleosteomorpha;Neoteleostei;Eurypterygia;Ctenosquamata;Acanthomorphata;Euacanthomorphacea;Percomorphaceae;Eupercaria;Lutjaniformes;Haemulidae;Diagramma;Diagramma picta	√	√	√	√	√	√	√	√	×	√	√	×
	Diaphus splendidus	NC_003164.1	Vertebrata;Gnathostomata;Teleostomi;Euteleostomi;Actinopterygii;Actinopteri;Neopterygii;Teleostei;Osteoglossocephalai;Clupeocephala;Euteleosteomorpha;Neoteleostei;Eurypterygia;Ctenosquamata;Myctophata;Myctophiformes;Myctophidae;Diaphus;Diaphus splendidus	√	√	√	√	×	√	√	√	√	√	√	×
	Dicentrarchus labrax	NC_026074.1	Vertebrata;Gnathostomata;Teleostomi;Euteleostomi;Actinopterygii;Actinopteri;Neopterygii;Teleostei;Osteoglossocephalai;Clupeocephala;Euteleosteomorpha;Neoteleostei;Eurypterygia;Ctenosquamata;Acanthomorphata;Euacanthomorphacea;Percomorphaceae;Eupercaria;Eupercaria incertae sedis;Moronidae;Dicentrarchus;Dicentrarchus labrax	√	√	√	√	√	√	√	√	×	√	×	×
	Dicentrarchus punctatus	NC_026075.1	Vertebrata;Gnathostomata;Teleostomi;Euteleostomi;Actinopterygii;Actinopteri;Neopterygii;Teleostei;Osteoglossocephalai;Clupeocephala;Euteleosteomorpha;Neoteleostei;Eurypterygia;Ctenosquamata;Acanthomorphata;Euacanthomorphacea;Percomorphaceae;Eupercaria;Eupercaria incertae sedis;Moronidae;Dicentrarchus;Dicentrarchus punctatus	√	√	√	√	√	√	√	√	×	√	×	×
	Diceratias pileatus	NC_013870.1	Vertebrata;Gnathostomata;Teleostomi;Euteleostomi;Actinopterygii;Actinopteri;Neopterygii;Teleostei;Osteoglossocephalai;Clupeocephala;Euteleosteomorpha;Neoteleostei;Eurypterygia;Ctenosquamata;Acanthomorphata;Euacanthomorphacea;Percomorphaceae;Eupercaria;Lophiiformes;Ceratioidei;Diceratiidae;Diceratias;Diceratias pileatus	√	√	√	√	√	√	√	√	×	√	√	×
	Dictyosoma burgeri	MT942974.1	Vertebrata;Gnathostomata;Teleostomi;Euteleostomi;Actinopterygii;Actinopteri;Neopterygii;Teleostei;Osteoglossocephalai;Clupeocephala;Euteleosteomorpha;Neoteleostei;Eurypterygia;Ctenosquamata;Acanthomorphata;Euacanthomorphacea;Percomorphaceae;Eupercaria;Perciformes;Cottioidei;Zoarcales;Stichaeidae;Xiphisterinae;Dictyosoma;Dictyosoma burgeri	√	√	√	√	√	√	√	√	×	√	×	×
	Dimidiochromis compressiceps	NC_018561.1	Vertebrata;Gnathostomata;Teleostomi;Euteleostomi;Actinopterygii;Actinopteri;Neopterygii;Teleostei;Osteoglossocephalai;Clupeocephala;Euteleosteomorpha;Neoteleostei;Eurypterygia;Ctenosquamata;Acanthomorphata;Euacanthomorphacea;Percomorphaceae;Ovalentaria;Cichlomorphae;Cichliformes;Cichlidae;African cichlids;Pseudocrenilabrinae;Haplochromini;Dimidiochromis;Dimidiochromis compressiceps	√	√	√	√	√	√	√	√	×	√	√	×
	Dimidiochromis kiwinge	NC_030608.1	Vertebrata;Gnathostomata;Teleostomi;Euteleostomi;Actinopterygii;Actinopteri;Neopterygii;Teleostei;Osteoglossocephalai;Clupeocephala;Euteleosteomorpha;Neoteleostei;Eurypterygia;Ctenosquamata;Acanthomorphata;Euacanthomorphacea;Percomorphaceae;Ovalentaria;Cichlomorphae;Cichliformes;Cichlidae;African cichlids;Pseudocrenilabrinae;Haplochromini;Dimidiochromis;Dimidiochromis kiwinge	√	√	√	√	√	√	√	√	×	√	√	×
	Dimidiochromis strigatus	KX346235.1	Vertebrata;Gnathostomata;Teleostomi;Euteleostomi;Actinopterygii;Actinopteri;Neopterygii;Teleostei;Osteoglossocephalai;Clupeocephala;Euteleosteomorpha;Neoteleostei;Eurypterygia;Ctenosquamata;Acanthomorphata;Euacanthomorphacea;Percomorphaceae;Ovalentaria;Cichlomorphae;Cichliformes;Cichlidae;African cichlids;Pseudocrenilabrinae;Haplochromini;Dimidiochromis;Dimidiochromis strigatus	√	√	√	√	√	√	√	√	×	√	√	×
	Diodon holocanthus	NC_009866.1	Vertebrata;Gnathostomata;Teleostomi;Euteleostomi;Actinopterygii;Actinopteri;Neopterygii;Teleostei;Osteoglossocephalai;Clupeocephala;Euteleosteomorpha;Neoteleostei;Eurypterygia;Ctenosquamata;Acanthomorphata;Euacanthomorphacea;Percomorphaceae;Eupercaria;Tetraodontiformes;Tetraodontoidei;Diodontidae;Diodon;Diodon holocanthus	√	√	√	√	√	√	√	√	×	√	√	×
	Diodon hystrix	NC_034657.1	Vertebrata;Gnathostomata;Teleostomi;Euteleostomi;Actinopterygii;Actinopteri;Neopterygii;Teleostei;Osteoglossocephalai;Clupeocephala;Euteleosteomorpha;Neoteleostei;Eurypterygia;Ctenosquamata;Acanthomorphata;Euacanthomorphacea;Percomorphaceae;Eupercaria;Tetraodontiformes;Tetraodontoidei;Diodontidae;Diodon;Diodon hystrix	√	√	√	√	√	√	√	√	×	√	×	×
	Diodon liturosus	NC_034658.1	Vertebrata;Gnathostomata;Teleostomi;Euteleostomi;Actinopterygii;Actinopteri;Neopterygii;Teleostei;Osteoglossocephalai;Clupeocephala;Euteleosteomorpha;Neoteleostei;Eurypterygia;Ctenosquamata;Acanthomorphata;Euacanthomorphacea;Percomorphaceae;Eupercaria;Tetraodontiformes;Tetraodontoidei;Diodontidae;Diodon;Diodon liturosus	√	√	√	√	√	√	√	√	×	√	√	×
	Diplacanthopoma brachysoma	NC_004376.1	Vertebrata;Gnathostomata;Teleostomi;Euteleostomi;Actinopterygii;Actinopteri;Neopterygii;Teleostei;Osteoglossocephalai;Clupeocephala;Euteleosteomorpha;Neoteleostei;Eurypterygia;Ctenosquamata;Acanthomorphata;Euacanthomorphacea;Percomorphaceae;Ophidiaria;Ophidiiformes;Bythitoidei;Bythitidae;Bythitinae;Diplacanthopoma;Diplacanthopoma brachysoma	√	√	√	√	√	√	√	√	×	√	√	×
	Diplodus puntazzo	MT319027.1	Vertebrata;Gnathostomata;Teleostomi;Euteleostomi;Actinopterygii;Actinopteri;Neopterygii;Teleostei;Osteoglossocephalai;Clupeocephala;Euteleosteomorpha;Neoteleostei;Eurypterygia;Ctenosquamata;Acanthomorphata;Euacanthomorphacea;Percomorphaceae;Eupercaria;Spariformes;Sparidae;Diplodus;Diplodus puntazzo	√	√	√	√	√	√	√	√	×	√	√	×
	diploid Megalobrama amblycephala x Xenocypris davidi	GU949545.1	Vertebrata;Gnathostomata;Teleostomi;Euteleostomi;Actinopterygii;Actinopteri;Neopterygii;Teleostei;Osteoglossocephalai;Clupeocephala;Otomorpha;Ostariophysi;Otophysi;Cypriniphysae;Cypriniformes;Cyprinoidei;Cyprinoidei intergeneric hybrids;diploid Megalobrama amblycephala x Xenocypris davidi	√	√	√	√	√	√	√	√	√	√	√	×
	diploid Xenocypris davidi x Megalobrama amblycephala	HQ651067.1	Vertebrata;Gnathostomata;Teleostomi;Euteleostomi;Actinopterygii;Actinopteri;Neopterygii;Teleostei;Osteoglossocephalai;Clupeocephala;Otomorpha;Ostariophysi;Otophysi;Cypriniphysae;Cypriniformes;Cyprinoidei;Cyprinoidei intergeneric hybrids;diploid Xenocypris davidi x Megalobrama amblycephala	√	√	√	√	√	√	√	√	√	√	√	×
	Diplomystes nahuelbutaensis	NC_015823.1	Vertebrata;Gnathostomata;Teleostomi;Euteleostomi;Actinopterygii;Actinopteri;Neopterygii;Teleostei;Osteoglossocephalai;Clupeocephala;Otomorpha;Ostariophysi;Otophysi;Characiphysae;Siluriformes;Diplomystoidei;Diplomystidae;Diplomystes;Diplomystes nahuelbutaensis	√	√	√	√	√	√	√	√	√	√	√	×
	Diplophos taenia	NC_002647.1	Vertebrata;Gnathostomata;Teleostomi;Euteleostomi;Actinopterygii;Actinopteri;Neopterygii;Teleostei;Osteoglossocephalai;Clupeocephala;Euteleosteomorpha;Stomiati;Stomiiformes;Diplophidae;Diplophos;Diplophos taenia	√	√	√	√	√	√	√	√	×	√	√	×
	Diploprion bifasciatum	NC_026897.1	Vertebrata;Gnathostomata;Teleostomi;Euteleostomi;Actinopterygii;Actinopteri;Neopterygii;Teleostei;Osteoglossocephalai;Clupeocephala;Euteleosteomorpha;Neoteleostei;Eurypterygia;Ctenosquamata;Acanthomorphata;Euacanthomorphacea;Percomorphaceae;Eupercaria;Perciformes;Serranoidei;Serranidae;Epinephelinae;Diploprionini;Diploprion;Diploprion bifasciatum	√	√	√	√	√	√	√	√	×	√	√	×
	Diplotaxodon limnothrissa	NC_018556.1	Vertebrata;Gnathostomata;Teleostomi;Euteleostomi;Actinopterygii;Actinopteri;Neopterygii;Teleostei;Osteoglossocephalai;Clupeocephala;Euteleosteomorpha;Neoteleostei;Eurypterygia;Ctenosquamata;Acanthomorphata;Euacanthomorphacea;Percomorphaceae;Ovalentaria;Cichlomorphae;Cichliformes;Cichlidae;African cichlids;Pseudocrenilabrinae;Haplochromini;Diplotaxodon;Diplotaxodon limnothrissa	√	√	√	√	√	√	√	√	×	√	√	×
	Diptychus maculatus	MN413609.1	Vertebrata;Gnathostomata;Teleostomi;Euteleostomi;Actinopterygii;Actinopteri;Neopterygii;Teleostei;Osteoglossocephalai;Clupeocephala;Otomorpha;Ostariophysi;Otophysi;Cypriniphysae;Cypriniformes;Cyprinoidei;Cyprinidae;Schizopygopsinae;Diptychus;Diptychus maculatus	√	√	√	√	√	√	√	√	√	√	√	×
	Diretmoides veriginae	NC_008126.1	Vertebrata;Gnathostomata;Teleostomi;Euteleostomi;Actinopterygii;Actinopteri;Neopterygii;Teleostei;Osteoglossocephalai;Clupeocephala;Euteleosteomorpha;Neoteleostei;Eurypterygia;Ctenosquamata;Acanthomorphata;Euacanthomorphacea;Berycimorphaceae;Trachichthyiformes;Diretmidae;Diretmoides;Diretmoides veriginae	√	√	√	√	√	√	√	√	×	√	√	×
	Diretmus argenteus	NC_008127.1	Vertebrata;Gnathostomata;Teleostomi;Euteleostomi;Actinopterygii;Actinopteri;Neopterygii;Teleostei;Osteoglossocephalai;Clupeocephala;Euteleosteomorpha;Neoteleostei;Eurypterygia;Ctenosquamata;Acanthomorphata;Euacanthomorphacea;Berycimorphaceae;Trachichthyiformes;Diretmidae;Diretmus;Diretmus argenteus	√	√	√	√	√	√	√	√	×	√	×	×
	Discocheilus wui	NC_045066.1	Vertebrata;Gnathostomata;Teleostomi;Euteleostomi;Actinopterygii;Actinopteri;Neopterygii;Teleostei;Osteoglossocephalai;Clupeocephala;Otomorpha;Ostariophysi;Otophysi;Cypriniphysae;Cypriniformes;Cyprinoidei;Cyprinidae;Labeoninae;'Semilabeonini';Discocheilus;Discocheilus wui	√	√	√	√	√	√	√	√	√	√	√	×
	Discogobio laticeps	NC_045918.1	Vertebrata;Gnathostomata;Teleostomi;Euteleostomi;Actinopterygii;Actinopteri;Neopterygii;Teleostei;Osteoglossocephalai;Clupeocephala;Otomorpha;Ostariophysi;Otophysi;Cypriniphysae;Cypriniformes;Cyprinoidei;Cyprinidae;Labeoninae;'Semilabeonini';Discogobio;Discogobio laticeps	√	√	√	√	√	√	√	√	√	√	√	×
	Discogobio longibarbatus	NC_036301.1	Vertebrata;Gnathostomata;Teleostomi;Euteleostomi;Actinopterygii;Actinopteri;Neopterygii;Teleostei;Osteoglossocephalai;Clupeocephala;Otomorpha;Ostariophysi;Otophysi;Cypriniphysae;Cypriniformes;Cyprinoidei;Cyprinidae;Labeoninae;'Semilabeonini';Discogobio;Discogobio longibarbatus	√	√	√	√	√	√	√	√	√	√	√	×
	Discogobio tetrabarbatus	NC_024578.1	Vertebrata;Gnathostomata;Teleostomi;Euteleostomi;Actinopterygii;Actinopteri;Neopterygii;Teleostei;Osteoglossocephalai;Clupeocephala;Otomorpha;Ostariophysi;Otophysi;Cypriniphysae;Cypriniformes;Cyprinoidei;Cyprinidae;Labeoninae;'Semilabeonini';Discogobio;Discogobio tetrabarbatus	√	√	√	√	√	√	√	√	√	√	√	×
	Discogobio yunnanensis	NC_025319.1	Vertebrata;Gnathostomata;Teleostomi;Euteleostomi;Actinopterygii;Actinopteri;Neopterygii;Teleostei;Osteoglossocephalai;Clupeocephala;Otomorpha;Ostariophysi;Otophysi;Cypriniphysae;Cypriniformes;Cyprinoidei;Cyprinidae;Labeoninae;'Semilabeonini';Discogobio;Discogobio yunnanensis	√	√	√	√	√	√	√	√	√	√	√	×
	Discolabeo wuluoheensis	NC_045067.1	Vertebrata;Gnathostomata;Teleostomi;Euteleostomi;Actinopterygii;Actinopteri;Neopterygii;Teleostei;Osteoglossocephalai;Clupeocephala;Otomorpha;Ostariophysi;Otophysi;Cypriniphysae;Cypriniformes;Cyprinoidei;Cyprinidae;Labeoninae;Garrini;Discolabeo;Discolabeo wuluoheensis	√	√	√	√	√	√	√	√	√	√	√	×
	Dissostichus eleginoides	NC_018135.1	Vertebrata;Gnathostomata;Teleostomi;Euteleostomi;Actinopterygii;Actinopteri;Neopterygii;Teleostei;Osteoglossocephalai;Clupeocephala;Euteleosteomorpha;Neoteleostei;Eurypterygia;Ctenosquamata;Acanthomorphata;Euacanthomorphacea;Percomorphaceae;Eupercaria;Perciformes;Notothenioidei;Nototheniidae;Dissostichus;Dissostichus eleginoides	√	√	√	√	√	√	√	√	×	√	×	×
	Distichodus sexfasciatus	NC_015836.1	Vertebrata;Gnathostomata;Teleostomi;Euteleostomi;Actinopterygii;Actinopteri;Neopterygii;Teleostei;Osteoglossocephalai;Clupeocephala;Otomorpha;Ostariophysi;Otophysi;Characiphysae;Characiformes;Citharinoidei;Distichodontidae;Distichodus;Distichodus sexfasciatus	√	√	√	√	√	√	√	√	√	√	√	×
	Distoechodon tumirostris	DQ026431.1	Vertebrata;Gnathostomata;Teleostomi;Euteleostomi;Actinopterygii;Actinopteri;Neopterygii;Teleostei;Osteoglossocephalai;Clupeocephala;Otomorpha;Ostariophysi;Otophysi;Cypriniphysae;Cypriniformes;Cyprinoidei;Xenocyprididae;Xenocypridinae;Distoechodon;Distoechodon tumirostris	√	√	√	√	√	√	√	√	√	√	√	×
	Ditrema temminckii	NC_009060.1	Vertebrata;Gnathostomata;Teleostomi;Euteleostomi;Actinopterygii;Actinopteri;Neopterygii;Teleostei;Osteoglossocephalai;Clupeocephala;Euteleosteomorpha;Neoteleostei;Eurypterygia;Ctenosquamata;Acanthomorphata;Euacanthomorphacea;Percomorphaceae;Ovalentaria;Ovalentaria incertae sedis;Embiotocidae;Ditrema;Ditrema temminckii	√	√	√	√	√	√	√	√	×	√	√	×
	Doederleinia berycoides	NC_009867.1	Vertebrata;Gnathostomata;Teleostomi;Euteleostomi;Actinopterygii;Actinopteri;Neopterygii;Teleostei;Osteoglossocephalai;Clupeocephala;Euteleosteomorpha;Neoteleostei;Eurypterygia;Ctenosquamata;Acanthomorphata;Euacanthomorphacea;Percomorphaceae;Eupercaria;Pempheriformes;Acropomatidae;Doederleinia;Doederleinia berycoides	√	√	√	√	√	√	√	√	×	√	×	×
	Dorosoma cepedianum	MG570459.1	Vertebrata;Gnathostomata;Teleostomi;Euteleostomi;Actinopterygii;Actinopteri;Neopterygii;Teleostei;Osteoglossocephalai;Clupeocephala;Otomorpha;Clupei;Clupeiformes;Clupeoidei;Clupeidae;Dorosomatinae;Dorosoma;Dorosoma cepedianum	√	√	√	√	√	√	√	√	×	√	√	×
	Dorosoma petenense	NC_009580.1	Vertebrata;Gnathostomata;Teleostomi;Euteleostomi;Actinopterygii;Actinopteri;Neopterygii;Teleostei;Osteoglossocephalai;Clupeocephala;Otomorpha;Clupei;Clupeiformes;Clupeoidei;Clupeidae;Dorosomatinae;Dorosoma;Dorosoma petenense	√	√	√	√	√	√	√	√	×	√	√	×
	Doryichthys boaja	MH259592.1	Vertebrata;Gnathostomata;Teleostomi;Euteleostomi;Actinopterygii;Actinopteri;Neopterygii;Teleostei;Osteoglossocephalai;Clupeocephala;Euteleosteomorpha;Neoteleostei;Eurypterygia;Ctenosquamata;Acanthomorphata;Euacanthomorphacea;Percomorphaceae;Syngnathiaria;Syngnathiformes;Syngnathoidei;Syngnathidae;Syngnathinae;Doryichthys;Doryichthys boaja	√	√	√	√	√	√	√	√	×	√	√	×
	Doryrhamphus japonicus	NC_024187.1	Vertebrata;Gnathostomata;Teleostomi;Euteleostomi;Actinopterygii;Actinopteri;Neopterygii;Teleostei;Osteoglossocephalai;Clupeocephala;Euteleosteomorpha;Neoteleostei;Eurypterygia;Ctenosquamata;Acanthomorphata;Euacanthomorphacea;Percomorphaceae;Syngnathiaria;Syngnathiformes;Syngnathoidei;Syngnathidae;Syngnathinae;Doryrhamphus;Doryrhamphus japonicus	√	√	√	√	√	√	√	√	×	√	√	×
	Draconetta xenica	NC_024185.1	Vertebrata;Gnathostomata;Teleostomi;Euteleostomi;Actinopterygii;Actinopteri;Neopterygii;Teleostei;Osteoglossocephalai;Clupeocephala;Euteleosteomorpha;Neoteleostei;Eurypterygia;Ctenosquamata;Acanthomorphata;Euacanthomorphacea;Percomorphaceae;Syngnathiaria;Syngnathiformes;Callionymoidei;Draconettidae;Draconetta;Draconetta xenica	√	√	√	√	√	√	√	√	×	√	√	×
	Drepane longimana	KP164983.1	Vertebrata;Gnathostomata;Teleostomi;Euteleostomi;Actinopterygii;Actinopteri;Neopterygii;Teleostei;Osteoglossocephalai;Clupeocephala;Euteleosteomorpha;Neoteleostei;Eurypterygia;Ctenosquamata;Acanthomorphata;Euacanthomorphacea;Percomorphaceae;Eupercaria;Ephippiformes;Drepaneidae;Drepane;Drepane longimana	√	√	√	√	√	√	√	√	×	√	√	×
	Drepane punctata	KM273123.1	Vertebrata;Gnathostomata;Teleostomi;Euteleostomi;Actinopterygii;Actinopteri;Neopterygii;Teleostei;Osteoglossocephalai;Clupeocephala;Euteleosteomorpha;Neoteleostei;Eurypterygia;Ctenosquamata;Acanthomorphata;Euacanthomorphacea;Percomorphaceae;Eupercaria;Ephippiformes;Drepaneidae;Drepane;Drepane punctata	√	√	√	√	√	√	√	√	×	√	√	×
	Dunckerocampus dactyliophorus	NC_039893.1	Vertebrata;Gnathostomata;Teleostomi;Euteleostomi;Actinopterygii;Actinopteri;Neopterygii;Teleostei;Osteoglossocephalai;Clupeocephala;Euteleosteomorpha;Neoteleostei;Eurypterygia;Ctenosquamata;Acanthomorphata;Euacanthomorphacea;Percomorphaceae;Syngnathiaria;Syngnathiformes;Syngnathoidei;Syngnathidae;Syngnathinae;Dunckerocampus;Dunckerocampus dactyliophorus	√	√	√	√	√	√	√	√	×	√	√	×
	Duringlanis perugiae	NC_015748.1	Vertebrata;Gnathostomata;Teleostomi;Euteleostomi;Actinopterygii;Actinopteri;Neopterygii;Teleostei;Osteoglossocephalai;Clupeocephala;Otomorpha;Ostariophysi;Otophysi;Characiphysae;Siluriformes;Siluroidei;Auchenipteridae;Centromochlinae;Duringlanis;Duringlanis perugiae	√	√	√	√	√	√	√	√	√	√	√	×
	Dussumieria elopsoides	NC_035063.1	Vertebrata;Gnathostomata;Teleostomi;Euteleostomi;Actinopterygii;Actinopteri;Neopterygii;Teleostei;Osteoglossocephalai;Clupeocephala;Otomorpha;Clupei;Clupeiformes;Clupeoidei;Dussumieriidae;Dussumieria;Dussumieria elopsoides	√	√	√	√	√	√	√	√	×	√	√	×
	Dysalotus alcocki	NC_022482.1	Vertebrata;Gnathostomata;Teleostomi;Euteleostomi;Actinopterygii;Actinopteri;Neopterygii;Teleostei;Osteoglossocephalai;Clupeocephala;Euteleosteomorpha;Neoteleostei;Eurypterygia;Ctenosquamata;Acanthomorphata;Euacanthomorphacea;Percomorphaceae;Pelagiaria;Scombriformes;Chiasmodontidae;Dysalotus;Dysalotus alcocki	√	√	√	√	√	√	√	√	×	√	√	×
	Dysomma anguillare	MK574146.1	Vertebrata;Gnathostomata;Teleostomi;Euteleostomi;Actinopterygii;Actinopteri;Neopterygii;Teleostei;Elopocephalai;Elopocephala;Elopomorpha;Anguilliformes;Synaphobranchidae;Ilyophinae;Dysomma;Dysomma anguillare	√	√	√	√	√	√	√	√	×	√	√	×
	Echeneis naucrates	NC_022508.1	Vertebrata;Gnathostomata;Teleostomi;Euteleostomi;Actinopterygii;Actinopteri;Neopterygii;Teleostei;Osteoglossocephalai;Clupeocephala;Euteleosteomorpha;Neoteleostei;Eurypterygia;Ctenosquamata;Acanthomorphata;Euacanthomorphacea;Percomorphaceae;Carangaria;Carangiformes;Echeneidae;Echeneis;Echeneis naucrates	√	√	√	√	√	√	√	√	×	√	√	×
	Echiichthys vipera	MT410919.1	Vertebrata;Gnathostomata;Teleostomi;Euteleostomi;Actinopterygii;Actinopteri;Neopterygii;Teleostei;Osteoglossocephalai;Clupeocephala;Euteleosteomorpha;Neoteleostei;Eurypterygia;Ctenosquamata;Acanthomorphata;Euacanthomorphacea;Percomorphaceae;Eupercaria;Perciformes;Percoidei;Trachinidae;Echiichthys;Echiichthys vipera	√	√	√	√	√	√	√	√	×	√	√	×
	Ecsenius bicolor	NC_028295.1	Vertebrata;Gnathostomata;Teleostomi;Euteleostomi;Actinopterygii;Actinopteri;Neopterygii;Teleostei;Osteoglossocephalai;Clupeocephala;Euteleosteomorpha;Neoteleostei;Eurypterygia;Ctenosquamata;Acanthomorphata;Euacanthomorphacea;Percomorphaceae;Ovalentaria;Blenniimorphae;Blenniiformes;Blennioidei;Blenniidae;Salariinae;Ecsenius;Ecsenius bicolor	√	√	√	√	√	√	√	√	×	√	√	×
	Eigenmannia sp. CBM-ZF-10620	NC_004701.1	Vertebrata;Gnathostomata;Teleostomi;Euteleostomi;Actinopterygii;Actinopteri;Neopterygii;Teleostei;Osteoglossocephalai;Clupeocephala;Otomorpha;Ostariophysi;Otophysi;Characiphysae;Gymnotiformes;Sternopygoidei;Sternopygidae;Eigenmannia;unclassified Eigenmannia;Eigenmannia sp. CBM-ZF-10620	√	√	√	√	√	√	√	√	√	√	√	×
	Elagatis bipinnulata	KP677573.1	Vertebrata;Gnathostomata;Teleostomi;Euteleostomi;Actinopterygii;Actinopteri;Neopterygii;Teleostei;Osteoglossocephalai;Clupeocephala;Euteleosteomorpha;Neoteleostei;Eurypterygia;Ctenosquamata;Acanthomorphata;Euacanthomorphacea;Percomorphaceae;Carangaria;Carangiformes;Carangidae;Elagatis;Elagatis bipinnulata	√	√	√	√	√	√	√	√	×	√	√	×
	Elassoma evergladei	NC_003175.1	Vertebrata;Gnathostomata;Teleostomi;Euteleostomi;Actinopterygii;Actinopteri;Neopterygii;Teleostei;Osteoglossocephalai;Clupeocephala;Euteleosteomorpha;Neoteleostei;Eurypterygia;Ctenosquamata;Acanthomorphata;Euacanthomorphacea;Percomorphaceae;Eupercaria;Centrarchiformes;Centrarchoidei;Elassomatidae;Elassoma;Elassoma evergladei	√	√	√	√	√	√	√	√	×	√	√	×
	Elassoma zonatum	NC_011388.1	Vertebrata;Gnathostomata;Teleostomi;Euteleostomi;Actinopterygii;Actinopteri;Neopterygii;Teleostei;Osteoglossocephalai;Clupeocephala;Euteleosteomorpha;Neoteleostei;Eurypterygia;Ctenosquamata;Acanthomorphata;Euacanthomorphacea;Percomorphaceae;Eupercaria;Centrarchiformes;Centrarchoidei;Elassomatidae;Elassoma;Elassoma zonatum	√	√	√	√	√	√	√	√	×	√	√	×
	Electrona carlsbergi	NC_036348.1	Vertebrata;Gnathostomata;Teleostomi;Euteleostomi;Actinopterygii;Actinopteri;Neopterygii;Teleostei;Osteoglossocephalai;Clupeocephala;Euteleosteomorpha;Neoteleostei;Eurypterygia;Ctenosquamata;Myctophata;Myctophiformes;Myctophidae;Electrona;Electrona carlsbergi	√	√	√	√	√	√	√	√	√	√	×	×
	Electrophorus electricus	AP011978.1	Vertebrata;Gnathostomata;Teleostomi;Euteleostomi;Actinopterygii;Actinopteri;Neopterygii;Teleostei;Osteoglossocephalai;Clupeocephala;Otomorpha;Ostariophysi;Otophysi;Characiphysae;Gymnotiformes;Gymnotoidei;Gymnotidae;Electrophorus;Electrophorus electricus	√	√	√	√	√	√	√	√	√	√	√	×
	Eleginops maclovinus	NC_033386.1	Vertebrata;Gnathostomata;Teleostomi;Euteleostomi;Actinopterygii;Actinopteri;Neopterygii;Teleostei;Osteoglossocephalai;Clupeocephala;Euteleosteomorpha;Neoteleostei;Eurypterygia;Ctenosquamata;Acanthomorphata;Euacanthomorphacea;Percomorphaceae;Eupercaria;Perciformes;Notothenioidei;Eleginopidae;Eleginops;Eleginops maclovinus	√	√	√	√	√	√	√	√	×	√	√	×
	Eleginus gracilis	NC_045206.1	Vertebrata;Gnathostomata;Teleostomi;Euteleostomi;Actinopterygii;Actinopteri;Neopterygii;Teleostei;Osteoglossocephalai;Clupeocephala;Euteleosteomorpha;Neoteleostei;Eurypterygia;Ctenosquamata;Acanthomorphata;Paracanthopterygii;Zeiogadaria;Gadariae;Gadiformes;Gadoidei;Gadidae;Eleginus;Eleginus gracilis	√	√	×	√	√	√	√	√	×	√	√	×
	Eleotris acanthopoma	MH367493.1	Vertebrata;Gnathostomata;Teleostomi;Euteleostomi;Actinopterygii;Actinopteri;Neopterygii;Teleostei;Osteoglossocephalai;Clupeocephala;Euteleosteomorpha;Neoteleostei;Eurypterygia;Ctenosquamata;Acanthomorphata;Euacanthomorphacea;Percomorphaceae;Gobiaria;Gobiiformes;Eleotroidei;Eleotridae;Eleotrinae;Eleotris;Eleotris acanthopoma	√	√	√	√	√	√	√	√	×	√	√	×
	Eleotris amblyopsis	NC_036225.1	Vertebrata;Gnathostomata;Teleostomi;Euteleostomi;Actinopterygii;Actinopteri;Neopterygii;Teleostei;Osteoglossocephalai;Clupeocephala;Euteleosteomorpha;Neoteleostei;Eurypterygia;Ctenosquamata;Acanthomorphata;Euacanthomorphacea;Percomorphaceae;Gobiaria;Gobiiformes;Eleotroidei;Eleotridae;Eleotrinae;Eleotris;Eleotris amblyopsis	√	√	√	√	√	√	√	√	×	√	√	×
	Eleotris fusca	MH479400.1	Vertebrata;Gnathostomata;Teleostomi;Euteleostomi;Actinopterygii;Actinopteri;Neopterygii;Teleostei;Osteoglossocephalai;Clupeocephala;Euteleosteomorpha;Neoteleostei;Eurypterygia;Ctenosquamata;Acanthomorphata;Euacanthomorphacea;Percomorphaceae;Gobiaria;Gobiiformes;Eleotroidei;Eleotridae;Eleotrinae;Eleotris;Eleotris fusca	√	√	√	√	√	√	√	√	×	√	√	×
	Eleotris klunzingerii	NC_042774.1	Vertebrata;Gnathostomata;Teleostomi;Euteleostomi;Actinopterygii;Actinopteri;Neopterygii;Teleostei;Osteoglossocephalai;Clupeocephala;Euteleosteomorpha;Neoteleostei;Eurypterygia;Ctenosquamata;Acanthomorphata;Euacanthomorphacea;Percomorphaceae;Gobiaria;Gobiiformes;Eleotroidei;Eleotridae;Eleotrinae;Eleotris;Eleotris klunzingerii	√	√	√	√	√	√	√	√	×	√	√	×
	Eleotris oxycephala	KR921879.1	Vertebrata;Gnathostomata;Teleostomi;Euteleostomi;Actinopterygii;Actinopteri;Neopterygii;Teleostei;Osteoglossocephalai;Clupeocephala;Euteleosteomorpha;Neoteleostei;Eurypterygia;Ctenosquamata;Acanthomorphata;Euacanthomorphacea;Percomorphaceae;Gobiaria;Gobiiformes;Eleotroidei;Eleotridae;Eleotrinae;Eleotris;Eleotris oxycephala	√	√	√	√	√	√	√	√	×	√	√	×
	Eleotris picta	NC_036226.1	Vertebrata;Gnathostomata;Teleostomi;Euteleostomi;Actinopterygii;Actinopteri;Neopterygii;Teleostei;Osteoglossocephalai;Clupeocephala;Euteleosteomorpha;Neoteleostei;Eurypterygia;Ctenosquamata;Acanthomorphata;Euacanthomorphacea;Percomorphaceae;Gobiaria;Gobiiformes;Eleotroidei;Eleotridae;Eleotrinae;Eleotris;Eleotris picta	√	√	√	√	√	√	√	√	×	√	×	×
	Eleutheronema tetradactylum	KT593869.1	Vertebrata;Gnathostomata;Teleostomi;Euteleostomi;Actinopterygii;Actinopteri;Neopterygii;Teleostei;Osteoglossocephalai;Clupeocephala;Euteleosteomorpha;Neoteleostei;Eurypterygia;Ctenosquamata;Acanthomorphata;Euacanthomorphacea;Percomorphaceae;Carangaria;Carangaria incertae sedis;Polynemidae;Eleutheronema;Eleutheronema tetradactylum	√	√	√	√	√	√	√	×	×	√	√	×
	Ellopostoma mystax	NC_031642.1	Vertebrata;Gnathostomata;Teleostomi;Euteleostomi;Actinopterygii;Actinopteri;Neopterygii;Teleostei;Osteoglossocephalai;Clupeocephala;Otomorpha;Ostariophysi;Otophysi;Cypriniphysae;Cypriniformes;Cobitoidei;Ellopostomatidae;Ellopostoma;Ellopostoma mystax	√	√	√	√	√	√	√	√	√	√	√	×
	Elopichthys bambusa	NC_024834.1	Vertebrata;Gnathostomata;Teleostomi;Euteleostomi;Actinopterygii;Actinopteri;Neopterygii;Teleostei;Osteoglossocephalai;Clupeocephala;Otomorpha;Ostariophysi;Otophysi;Cypriniphysae;Cypriniformes;Cyprinoidei;Xenocyprididae;Xenocypridinae;Elopichthys;Elopichthys bambusa	√	√	√	√	√	√	√	√	√	√	√	×
	Elops hawaiensis	NC_005798.1	Vertebrata;Gnathostomata;Teleostomi;Euteleostomi;Actinopterygii;Actinopteri;Neopterygii;Teleostei;Elopocephalai;Elopocephala;Elopomorpha;Elopiformes;Elopidae;Elops;Elops hawaiensis	√	√	√	√	√	√	√	√	√	√	×	×
	Elops saurus	NC_005803.1	Vertebrata;Gnathostomata;Teleostomi;Euteleostomi;Actinopterygii;Actinopteri;Neopterygii;Teleostei;Elopocephalai;Elopocephala;Elopomorpha;Elopiformes;Elopidae;Elops;Elops saurus	√	√	√	√	√	√	√	√	√	√	×	×
	Embiotoca jacksoni	NC_029362.1	Vertebrata;Gnathostomata;Teleostomi;Euteleostomi;Actinopterygii;Actinopteri;Neopterygii;Teleostei;Osteoglossocephalai;Clupeocephala;Euteleosteomorpha;Neoteleostei;Eurypterygia;Ctenosquamata;Acanthomorphata;Euacanthomorphacea;Percomorphaceae;Ovalentaria;Ovalentaria incertae sedis;Embiotocidae;Embiotoca;Embiotoca jacksoni	√	√	√	√	√	√	√	√	×	√	√	×
	Emmelichthys struhsakeri	NC_004407.1	Vertebrata;Gnathostomata;Teleostomi;Euteleostomi;Actinopterygii;Actinopteri;Neopterygii;Teleostei;Osteoglossocephalai;Clupeocephala;Euteleosteomorpha;Neoteleostei;Eurypterygia;Ctenosquamata;Acanthomorphata;Euacanthomorphacea;Percomorphaceae;Eupercaria;Eupercaria incertae sedis;Emmelichthyidae;Emmelichthys;Emmelichthys struhsakeri	√	√	√	√	√	√	√	√	×	√	√	×
	Empetrichthys latos latos	KY014103.1	Vertebrata;Gnathostomata;Teleostomi;Euteleostomi;Actinopterygii;Actinopteri;Neopterygii;Teleostei;Osteoglossocephalai;Clupeocephala;Euteleosteomorpha;Neoteleostei;Eurypterygia;Ctenosquamata;Acanthomorphata;Euacanthomorphacea;Percomorphaceae;Ovalentaria;Atherinomorphae;Cyprinodontiformes;Cyprinodontoidei;Goodeidae;Empetrichthys;Empetrichthys latos;Empetrichthys latos latos	√	√	√	√	√	√	√	√	×	√	√	×
	Enchelynassa canina	NC_027234.1	Vertebrata;Gnathostomata;Teleostomi;Euteleostomi;Actinopterygii;Actinopteri;Neopterygii;Teleostei;Elopocephalai;Elopocephala;Elopomorpha;Anguilliformes;Muraenidae;Muraeninae;Enchelynassa;Enchelynassa canina	√	√	√	√	√	√	√	√	×	√	√	×
	Engraulis encrasicolus	MT410920.1	Vertebrata;Gnathostomata;Teleostomi;Euteleostomi;Actinopterygii;Actinopteri;Neopterygii;Teleostei;Osteoglossocephalai;Clupeocephala;Otomorpha;Clupei;Clupeiformes;Clupeoidei;Engraulidae;Engraulinae;Engraulis;Engraulis encrasicolus	√	√	√	√	√	√	√	√	×	√	√	×
	Engraulis japonicus	KF765500.2	Vertebrata;Gnathostomata;Teleostomi;Euteleostomi;Actinopterygii;Actinopteri;Neopterygii;Teleostei;Osteoglossocephalai;Clupeocephala;Otomorpha;Clupei;Clupeiformes;Clupeoidei;Engraulidae;Engraulinae;Engraulis;Engraulis japonicus	√	√	√	√	√	√	√	√	×	√	√	×
	Engraulis mordax	NC_041097.1	Vertebrata;Gnathostomata;Teleostomi;Euteleostomi;Actinopterygii;Actinopteri;Neopterygii;Teleostei;Osteoglossocephalai;Clupeocephala;Otomorpha;Clupei;Clupeiformes;Clupeoidei;Engraulidae;Engraulinae;Engraulis;Engraulis mordax	√	√	√	√	√	√	√	√	×	√	×	×
	Engraulis ringens	NC_042728.1	Vertebrata;Gnathostomata;Teleostomi;Euteleostomi;Actinopterygii;Actinopteri;Neopterygii;Teleostei;Osteoglossocephalai;Clupeocephala;Otomorpha;Clupei;Clupeiformes;Clupeoidei;Engraulidae;Engraulinae;Engraulis;Engraulis ringens	√	√	√	√	√	√	√	√	×	√	×	×
	Enophrys diceraus	NC_022147.1	Vertebrata;Gnathostomata;Teleostomi;Euteleostomi;Actinopterygii;Actinopteri;Neopterygii;Teleostei;Osteoglossocephalai;Clupeocephala;Euteleosteomorpha;Neoteleostei;Eurypterygia;Ctenosquamata;Acanthomorphata;Euacanthomorphacea;Percomorphaceae;Eupercaria;Perciformes;Cottioidei;Cottales;Cottidae;Enophrys;Enophrys diceraus	√	√	√	√	√	√	√	√	×	√	√	×
	Enoplosus armatus	NC_013181.1	Vertebrata;Gnathostomata;Teleostomi;Euteleostomi;Actinopterygii;Actinopteri;Neopterygii;Teleostei;Osteoglossocephalai;Clupeocephala;Euteleosteomorpha;Neoteleostei;Eurypterygia;Ctenosquamata;Acanthomorphata;Euacanthomorphacea;Percomorphaceae;Eupercaria;Centrarchiformes;Centrarchoidei;Enoplosidae;Enoplosus;Enoplosus armatus	√	√	√	√	√	√	√	√	×	√	×	×
	Enteromius trimaculatus	NC_008666.1	Vertebrata;Gnathostomata;Teleostomi;Euteleostomi;Actinopterygii;Actinopteri;Neopterygii;Teleostei;Osteoglossocephalai;Clupeocephala;Otomorpha;Ostariophysi;Otophysi;Cypriniphysae;Cypriniformes;Cyprinoidei;Cyprinidae;Smiliogastrinae;Enteromius;Enteromius trimaculatus	√	√	√	√	√	√	√	√	√	√	√	×
	Epalzeorhynchos frenatus	NC_033962.1	Vertebrata;Gnathostomata;Teleostomi;Euteleostomi;Actinopterygii;Actinopteri;Neopterygii;Teleostei;Osteoglossocephalai;Clupeocephala;Otomorpha;Ostariophysi;Otophysi;Cypriniphysae;Cypriniformes;Cyprinoidei;Cyprinidae;Labeoninae;'Osteochilini';Epalzeorhynchos;Epalzeorhynchos frenatus	√	√	√	√	√	√	√	√	√	√	√	×
	Ephippus orbis	NC_027733.1	Vertebrata;Gnathostomata;Teleostomi;Euteleostomi;Actinopterygii;Actinopteri;Neopterygii;Teleostei;Osteoglossocephalai;Clupeocephala;Euteleosteomorpha;Neoteleostei;Eurypterygia;Ctenosquamata;Acanthomorphata;Euacanthomorphacea;Percomorphaceae;Eupercaria;Ephippiformes;Ephippidae;Ephippus;Ephippus orbis	√	√	√	√	√	√	√	√	×	√	√	×
	Epigonus denticulatus	NC_034334.1	Vertebrata;Gnathostomata;Teleostomi;Euteleostomi;Actinopterygii;Actinopteri;Neopterygii;Teleostei;Osteoglossocephalai;Clupeocephala;Euteleosteomorpha;Neoteleostei;Eurypterygia;Ctenosquamata;Acanthomorphata;Euacanthomorphacea;Percomorphaceae;Eupercaria;Pempheriformes;Epigonidae;Epigonus;Epigonus denticulatus	√	√	√	√	√	√	√	√	×	√	√	×
	Epinephelus akaara	EU043377.1	Vertebrata;Gnathostomata;Teleostomi;Euteleostomi;Actinopterygii;Actinopteri;Neopterygii;Teleostei;Osteoglossocephalai;Clupeocephala;Euteleosteomorpha;Neoteleostei;Eurypterygia;Ctenosquamata;Acanthomorphata;Euacanthomorphacea;Percomorphaceae;Eupercaria;Perciformes;Serranoidei;Serranidae;Epinephelinae;Epinephelini;Epinephelus;Epinephelus akaara	√	√	√	√	√	√	√	√	×	√	√	×
	Epinephelus akaara x Epinephelus lanceolatus	MH123893.1	Vertebrata;Gnathostomata;Teleostomi;Euteleostomi;Actinopterygii;Actinopteri;Neopterygii;Teleostei;Osteoglossocephalai;Clupeocephala;Euteleosteomorpha;Neoteleostei;Eurypterygia;Ctenosquamata;Acanthomorphata;Euacanthomorphacea;Percomorphaceae;Eupercaria;Perciformes;Serranoidei;Serranidae;Epinephelinae;Epinephelini;Epinephelus;Epinephelus akaara x Epinephelus lanceolatus	√	√	√	√	√	√	√	√	×	√	×	×
	Epinephelus akaara x Epinephelus tukula	MN337034.1	Vertebrata;Gnathostomata;Teleostomi;Euteleostomi;Actinopterygii;Actinopteri;Neopterygii;Teleostei;Osteoglossocephalai;Clupeocephala;Euteleosteomorpha;Neoteleostei;Eurypterygia;Ctenosquamata;Acanthomorphata;Euacanthomorphacea;Percomorphaceae;Eupercaria;Perciformes;Serranoidei;Serranidae;Epinephelinae;Epinephelini;Epinephelus;Epinephelus akaara x Epinephelus tukula	√	√	√	√	√	√	√	√	×	√	√	×
	Epinephelus areolatus	NC_020785.1	Vertebrata;Gnathostomata;Teleostomi;Euteleostomi;Actinopterygii;Actinopteri;Neopterygii;Teleostei;Osteoglossocephalai;Clupeocephala;Euteleosteomorpha;Neoteleostei;Eurypterygia;Ctenosquamata;Acanthomorphata;Euacanthomorphacea;Percomorphaceae;Eupercaria;Perciformes;Serranoidei;Serranidae;Epinephelinae;Epinephelini;Epinephelus;Epinephelus areolatus	√	√	√	√	√	√	√	√	×	√	√	×
	Epinephelus awoara	KT240121.1	Vertebrata;Gnathostomata;Teleostomi;Euteleostomi;Actinopterygii;Actinopteri;Neopterygii;Teleostei;Osteoglossocephalai;Clupeocephala;Euteleosteomorpha;Neoteleostei;Eurypterygia;Ctenosquamata;Acanthomorphata;Euacanthomorphacea;Percomorphaceae;Eupercaria;Perciformes;Serranoidei;Serranidae;Epinephelinae;Epinephelini;Epinephelus;Epinephelus awoara	√	√	√	√	√	√	√	√	×	√	√	×
	Epinephelus awoara x Epinephelus tukula	MN879323.1	Vertebrata;Gnathostomata;Teleostomi;Euteleostomi;Actinopterygii;Actinopteri;Neopterygii;Teleostei;Osteoglossocephalai;Clupeocephala;Euteleosteomorpha;Neoteleostei;Eurypterygia;Ctenosquamata;Acanthomorphata;Euacanthomorphacea;Percomorphaceae;Eupercaria;Perciformes;Serranoidei;Serranidae;Epinephelinae;Epinephelini;Epinephelus;Epinephelus awoara x Epinephelus tukula	√	√	√	√	√	√	√	√	×	√	√	×
	Epinephelus bleekeri	NC_022848.1	Vertebrata;Gnathostomata;Teleostomi;Euteleostomi;Actinopterygii;Actinopteri;Neopterygii;Teleostei;Osteoglossocephalai;Clupeocephala;Euteleosteomorpha;Neoteleostei;Eurypterygia;Ctenosquamata;Acanthomorphata;Euacanthomorphacea;Percomorphaceae;Eupercaria;Perciformes;Serranoidei;Serranidae;Epinephelinae;Epinephelini;Epinephelus;Epinephelus bleekeri	√	√	√	√	√	√	√	√	×	√	√	×
	Epinephelus bontoides	NC_028428.1	Vertebrata;Gnathostomata;Teleostomi;Euteleostomi;Actinopterygii;Actinopteri;Neopterygii;Teleostei;Osteoglossocephalai;Clupeocephala;Euteleosteomorpha;Neoteleostei;Eurypterygia;Ctenosquamata;Acanthomorphata;Euacanthomorphacea;Percomorphaceae;Eupercaria;Perciformes;Serranoidei;Serranidae;Epinephelinae;Epinephelini;Epinephelus;Epinephelus bontoides	√	√	√	√	√	√	√	√	×	√	√	×
	Epinephelus bruneus	JQ518289.1	Vertebrata;Gnathostomata;Teleostomi;Euteleostomi;Actinopterygii;Actinopteri;Neopterygii;Teleostei;Osteoglossocephalai;Clupeocephala;Euteleosteomorpha;Neoteleostei;Eurypterygia;Ctenosquamata;Acanthomorphata;Euacanthomorphacea;Percomorphaceae;Eupercaria;Perciformes;Serranoidei;Serranidae;Epinephelinae;Epinephelini;Epinephelus;Epinephelus bruneus	√	√	√	√	√	√	√	√	×	√	×	×
	Epinephelus chlorostigma	MG739436.1	Vertebrata;Gnathostomata;Teleostomi;Euteleostomi;Actinopterygii;Actinopteri;Neopterygii;Teleostei;Osteoglossocephalai;Clupeocephala;Euteleosteomorpha;Neoteleostei;Eurypterygia;Ctenosquamata;Acanthomorphata;Euacanthomorphacea;Percomorphaceae;Eupercaria;Perciformes;Serranoidei;Serranidae;Epinephelinae;Epinephelini;Epinephelus;Epinephelus chlorostigma	√	√	√	√	√	√	√	√	×	√	√	×
	Epinephelus coioides	EU043376.1	Vertebrata;Gnathostomata;Teleostomi;Euteleostomi;Actinopterygii;Actinopteri;Neopterygii;Teleostei;Osteoglossocephalai;Clupeocephala;Euteleosteomorpha;Neoteleostei;Eurypterygia;Ctenosquamata;Acanthomorphata;Euacanthomorphacea;Percomorphaceae;Eupercaria;Perciformes;Serranoidei;Serranidae;Epinephelinae;Epinephelini;Epinephelus;Epinephelus coioides	√	√	√	√	√	√	√	√	×	√	×	×
	Epinephelus coioides x Epinephelus akaara	KX575834.1	Vertebrata;Gnathostomata;Teleostomi;Euteleostomi;Actinopterygii;Actinopteri;Neopterygii;Teleostei;Osteoglossocephalai;Clupeocephala;Euteleosteomorpha;Neoteleostei;Eurypterygia;Ctenosquamata;Acanthomorphata;Euacanthomorphacea;Percomorphaceae;Eupercaria;Perciformes;Serranoidei;Serranidae;Epinephelinae;Epinephelini;Epinephelus;Epinephelus coioides x Epinephelus akaara	√	√	√	√	√	√	√	√	×	√	×	×
	Epinephelus coioides x Epinephelus lanceolatus	NC_026464.1	Vertebrata;Gnathostomata;Teleostomi;Euteleostomi;Actinopterygii;Actinopteri;Neopterygii;Teleostei;Osteoglossocephalai;Clupeocephala;Euteleosteomorpha;Neoteleostei;Eurypterygia;Ctenosquamata;Acanthomorphata;Euacanthomorphacea;Percomorphaceae;Eupercaria;Perciformes;Serranoidei;Serranidae;Epinephelinae;Epinephelini;Epinephelus;Epinephelus coioides x Epinephelus lanceolatus	√	√	√	√	√	√	√	√	×	√	×	×
	Epinephelus corallicola	NC_026731.1	Vertebrata;Gnathostomata;Teleostomi;Euteleostomi;Actinopterygii;Actinopteri;Neopterygii;Teleostei;Osteoglossocephalai;Clupeocephala;Euteleosteomorpha;Neoteleostei;Eurypterygia;Ctenosquamata;Acanthomorphata;Euacanthomorphacea;Percomorphaceae;Eupercaria;Perciformes;Serranoidei;Serranidae;Epinephelinae;Epinephelini;Epinephelus;Epinephelus corallicola	√	√	√	√	√	√	√	√	×	√	√	×
	Epinephelus epistictus	NC_021462.1	Vertebrata;Gnathostomata;Teleostomi;Euteleostomi;Actinopterygii;Actinopteri;Neopterygii;Teleostei;Osteoglossocephalai;Clupeocephala;Euteleosteomorpha;Neoteleostei;Eurypterygia;Ctenosquamata;Acanthomorphata;Euacanthomorphacea;Percomorphaceae;Eupercaria;Perciformes;Serranoidei;Serranidae;Epinephelinae;Epinephelini;Epinephelus;Epinephelus epistictus	√	√	√	√	√	√	√	√	×	√	√	×
	Epinephelus fasciatomaculosus	NC_020782.1	Vertebrata;Gnathostomata;Teleostomi;Euteleostomi;Actinopterygii;Actinopteri;Neopterygii;Teleostei;Osteoglossocephalai;Clupeocephala;Euteleosteomorpha;Neoteleostei;Eurypterygia;Ctenosquamata;Acanthomorphata;Euacanthomorphacea;Percomorphaceae;Eupercaria;Perciformes;Serranoidei;Serranidae;Epinephelinae;Epinephelini;Epinephelus;Epinephelus fasciatomaculosus	√	√	√	√	√	√	√	√	×	√	√	×
	Epinephelus fuscoguttatus	MK791189.1	Vertebrata;Gnathostomata;Teleostomi;Euteleostomi;Actinopterygii;Actinopteri;Neopterygii;Teleostei;Osteoglossocephalai;Clupeocephala;Euteleosteomorpha;Neoteleostei;Eurypterygia;Ctenosquamata;Acanthomorphata;Euacanthomorphacea;Percomorphaceae;Eupercaria;Perciformes;Serranoidei;Serranidae;Epinephelinae;Epinephelini;Epinephelus;Epinephelus fuscoguttatus	√	√	√	√	√	√	√	√	×	√	×	×
	Epinephelus fuscoguttatus x Epinephelus lanceolatus	KX575835.1	Vertebrata;Gnathostomata;Teleostomi;Euteleostomi;Actinopterygii;Actinopteri;Neopterygii;Teleostei;Osteoglossocephalai;Clupeocephala;Euteleosteomorpha;Neoteleostei;Eurypterygia;Ctenosquamata;Acanthomorphata;Euacanthomorphacea;Percomorphaceae;Eupercaria;Perciformes;Serranoidei;Serranidae;Epinephelinae;Epinephelini;Epinephelus;Epinephelus fuscoguttatus x Epinephelus lanceolatus	√	√	√	√	√	√	√	√	×	√	√	×
	Epinephelus fuscoguttatus x Epinephelus polyphekadion	MT709279.1	Vertebrata;Gnathostomata;Teleostomi;Euteleostomi;Actinopterygii;Actinopteri;Neopterygii;Teleostei;Osteoglossocephalai;Clupeocephala;Euteleosteomorpha;Neoteleostei;Eurypterygia;Ctenosquamata;Acanthomorphata;Euacanthomorphacea;Percomorphaceae;Eupercaria;Perciformes;Serranoidei;Serranidae;Epinephelinae;Epinephelini;Epinephelus;Epinephelus fuscoguttatus x Epinephelus polyphekadion	√	√	√	√	√	√	√	√	×	√	√	×
	Epinephelus fuscoguttatus x Epinephelus tukula	NC_042416.1	Vertebrata;Gnathostomata;Teleostomi;Euteleostomi;Actinopterygii;Actinopteri;Neopterygii;Teleostei;Osteoglossocephalai;Clupeocephala;Euteleosteomorpha;Neoteleostei;Eurypterygia;Ctenosquamata;Acanthomorphata;Euacanthomorphacea;Percomorphaceae;Eupercaria;Perciformes;Serranoidei;Serranidae;Epinephelinae;Epinephelini;Epinephelus;Epinephelus fuscoguttatus x Epinephelus tukula	√	√	√	√	√	√	√	√	×	√	√	×
	Epinephelus lanceolatus	FJ472837.1	Vertebrata;Gnathostomata;Teleostomi;Euteleostomi;Actinopterygii;Actinopteri;Neopterygii;Teleostei;Osteoglossocephalai;Clupeocephala;Euteleosteomorpha;Neoteleostei;Eurypterygia;Ctenosquamata;Acanthomorphata;Euacanthomorphacea;Percomorphaceae;Eupercaria;Perciformes;Serranoidei;Serranidae;Epinephelinae;Epinephelini;Epinephelus;Epinephelus lanceolatus	√	√	√	√	√	√	√	√	×	√	×	×
	Epinephelus latifasciatus	NC_020784.1	Vertebrata;Gnathostomata;Teleostomi;Euteleostomi;Actinopterygii;Actinopteri;Neopterygii;Teleostei;Osteoglossocephalai;Clupeocephala;Euteleosteomorpha;Neoteleostei;Eurypterygia;Ctenosquamata;Acanthomorphata;Euacanthomorphacea;Percomorphaceae;Eupercaria;Perciformes;Serranoidei;Serranidae;Epinephelinae;Epinephelini;Epinephelus;Epinephelus latifasciatus	√	√	√	√	√	√	√	√	×	√	×	×
	Epinephelus malabaricus	NC_028406.1	Vertebrata;Gnathostomata;Teleostomi;Euteleostomi;Actinopterygii;Actinopteri;Neopterygii;Teleostei;Osteoglossocephalai;Clupeocephala;Euteleosteomorpha;Neoteleostei;Eurypterygia;Ctenosquamata;Acanthomorphata;Euacanthomorphacea;Percomorphaceae;Eupercaria;Perciformes;Serranoidei;Serranidae;Epinephelinae;Epinephelini;Epinephelus;Epinephelus malabaricus	√	√	√	√	√	√	√	√	×	√	×	×
	Epinephelus merra	NC_022509.1	Vertebrata;Gnathostomata;Teleostomi;Euteleostomi;Actinopterygii;Actinopteri;Neopterygii;Teleostei;Osteoglossocephalai;Clupeocephala;Euteleosteomorpha;Neoteleostei;Eurypterygia;Ctenosquamata;Acanthomorphata;Euacanthomorphacea;Percomorphaceae;Eupercaria;Perciformes;Serranoidei;Serranidae;Epinephelinae;Epinephelini;Epinephelus;Epinephelus merra	√	√	√	√	√	√	√	√	×	√	√	×
	Epinephelus moara	KP009977.1	Vertebrata;Gnathostomata;Teleostomi;Euteleostomi;Actinopterygii;Actinopteri;Neopterygii;Teleostei;Osteoglossocephalai;Clupeocephala;Euteleosteomorpha;Neoteleostei;Eurypterygia;Ctenosquamata;Acanthomorphata;Euacanthomorphacea;Percomorphaceae;Eupercaria;Perciformes;Serranoidei;Serranidae;Epinephelinae;Epinephelini;Epinephelus;Epinephelus moara	√	√	√	√	√	√	√	√	×	√	×	×
	Epinephelus moara x Epinephelus lanceolatus	MH123894.1	Vertebrata;Gnathostomata;Teleostomi;Euteleostomi;Actinopterygii;Actinopteri;Neopterygii;Teleostei;Osteoglossocephalai;Clupeocephala;Euteleosteomorpha;Neoteleostei;Eurypterygia;Ctenosquamata;Acanthomorphata;Euacanthomorphacea;Percomorphaceae;Eupercaria;Perciformes;Serranoidei;Serranidae;Epinephelinae;Epinephelini;Epinephelus;Epinephelus moara x Epinephelus lanceolatus	√	√	√	√	√	√	√	√	×	√	×	×
	Epinephelus moara x Epinephelus tukula	NC_040225.1	Vertebrata;Gnathostomata;Teleostomi;Euteleostomi;Actinopterygii;Actinopteri;Neopterygii;Teleostei;Osteoglossocephalai;Clupeocephala;Euteleosteomorpha;Neoteleostei;Eurypterygia;Ctenosquamata;Acanthomorphata;Euacanthomorphacea;Percomorphaceae;Eupercaria;Perciformes;Serranoidei;Serranidae;Epinephelinae;Epinephelini;Epinephelus;Epinephelus moara x Epinephelus tukula	√	√	√	√	√	√	√	√	×	√	×	×
	Epinephelus moara x Hyporthodus septemfasciatus	NC_030318.1	Vertebrata;Gnathostomata;Teleostomi;Euteleostomi;Actinopterygii;Actinopteri;Neopterygii;Teleostei;Osteoglossocephalai;Clupeocephala;Euteleosteomorpha;Neoteleostei;Eurypterygia;Ctenosquamata;Acanthomorphata;Euacanthomorphacea;Percomorphaceae;Eupercaria;Perciformes;Serranoidei;Serranidae;Epinephelinae;Epinephelini;Epinephelini intergeneric hybrids;Epinephelus moara x Hyporthodus septemfasciatus	√	√	√	√	√	√	√	√	×	√	×	×
	Epinephelus quoyanus	NC_021450.1	Vertebrata;Gnathostomata;Teleostomi;Euteleostomi;Actinopterygii;Actinopteri;Neopterygii;Teleostei;Osteoglossocephalai;Clupeocephala;Euteleosteomorpha;Neoteleostei;Eurypterygia;Ctenosquamata;Acanthomorphata;Euacanthomorphacea;Percomorphaceae;Eupercaria;Perciformes;Serranoidei;Serranidae;Epinephelinae;Epinephelini;Epinephelus;Epinephelus quoyans	√	√	√	√	√	√	√	√	×	√	√	×
	Epinephelus sexfasciatus	NC_021765.1	Vertebrata;Gnathostomata;Teleostomi;Euteleostomi;Actinopterygii;Actinopteri;Neopterygii;Teleostei;Osteoglossocephalai;Clupeocephala;Euteleosteomorpha;Neoteleostei;Eurypterygia;Ctenosquamata;Acanthomorphata;Euacanthomorphacea;Percomorphaceae;Eupercaria;Perciformes;Serranoidei;Serranidae;Epinephelinae;Epinephelini;Epinephelus;Epinephelus sexfasciatus	√	√	√	√	√	√	√	√	×	√	√	×
	Epinephelus stictus	NC_021133.1	Vertebrata;Gnathostomata;Teleostomi;Euteleostomi;Actinopterygii;Actinopteri;Neopterygii;Teleostei;Osteoglossocephalai;Clupeocephala;Euteleosteomorpha;Neoteleostei;Eurypterygia;Ctenosquamata;Acanthomorphata;Euacanthomorphacea;Percomorphaceae;Eupercaria;Perciformes;Serranoidei;Serranidae;Epinephelinae;Epinephelini;Epinephelus;Epinephelus stictus	√	√	√	√	√	√	√	√	×	√	√	×
	Epinephelus trimaculatus	NC_021612.1	Vertebrata;Gnathostomata;Teleostomi;Euteleostomi;Actinopterygii;Actinopteri;Neopterygii;Teleostei;Osteoglossocephalai;Clupeocephala;Euteleosteomorpha;Neoteleostei;Eurypterygia;Ctenosquamata;Acanthomorphata;Euacanthomorphacea;Percomorphaceae;Eupercaria;Perciformes;Serranoidei;Serranidae;Epinephelinae;Epinephelini;Epinephelus;Epinephelus trimaculatus	√	√	√	√	√	√	√	√	×	√	×	×
	Epinephelus tukula	NC_024039.1	Vertebrata;Gnathostomata;Teleostomi;Euteleostomi;Actinopterygii;Actinopteri;Neopterygii;Teleostei;Osteoglossocephalai;Clupeocephala;Euteleosteomorpha;Neoteleostei;Eurypterygia;Ctenosquamata;Acanthomorphata;Euacanthomorphacea;Percomorphaceae;Eupercaria;Perciformes;Serranoidei;Serranidae;Epinephelinae;Epinephelini;Epinephelus;Epinephelus tukula	√	√	√	√	√	√	√	√	√	√	×	×
	Epinnula magistralis	NC_022505.1	Vertebrata;Gnathostomata;Teleostomi;Euteleostomi;Actinopterygii;Actinopteri;Neopterygii;Teleostei;Osteoglossocephalai;Clupeocephala;Euteleosteomorpha;Neoteleostei;Eurypterygia;Ctenosquamata;Acanthomorphata;Euacanthomorphacea;Percomorphaceae;Pelagiaria;Scombriformes;Gempylidae;Epinnula;Epinnula magistralis	√	√	√	√	√	√	√	√	×	√	√	×
	Epiplatys dageti	NC_044426.1	Vertebrata;Gnathostomata;Teleostomi;Euteleostomi;Actinopterygii;Actinopteri;Neopterygii;Teleostei;Osteoglossocephalai;Clupeocephala;Euteleosteomorpha;Neoteleostei;Eurypterygia;Ctenosquamata;Acanthomorphata;Euacanthomorphacea;Percomorphaceae;Ovalentaria;Atherinomorphae;Cyprinodontiformes;Aplocheiloidei;Nothobranchiidae;Epiplatys;Epiplatys dageti	√	√	√	√	√	√	√	√	√	√	√	×
	Epiplatys grahami	NC_044456.1	Vertebrata;Gnathostomata;Teleostomi;Euteleostomi;Actinopterygii;Actinopteri;Neopterygii;Teleostei;Osteoglossocephalai;Clupeocephala;Euteleosteomorpha;Neoteleostei;Eurypterygia;Ctenosquamata;Acanthomorphata;Euacanthomorphacea;Percomorphaceae;Ovalentaria;Atherinomorphae;Cyprinodontiformes;Aplocheiloidei;Nothobranchiidae;Epiplatys;Epiplatys grahami	√	√	√	√	√	√	√	√	√	√	√	×
	Epiplatys guineensis	NC_044439.1	Vertebrata;Gnathostomata;Teleostomi;Euteleostomi;Actinopterygii;Actinopteri;Neopterygii;Teleostei;Osteoglossocephalai;Clupeocephala;Euteleosteomorpha;Neoteleostei;Eurypterygia;Ctenosquamata;Acanthomorphata;Euacanthomorphacea;Percomorphaceae;Ovalentaria;Atherinomorphae;Cyprinodontiformes;Aplocheiloidei;Nothobranchiidae;Epiplatys;Epiplatys guineensis	√	√	√	√	√	√	√	√	√	√	√	×
	Epiplatys lamottei	NC_044440.1	Vertebrata;Gnathostomata;Teleostomi;Euteleostomi;Actinopterygii;Actinopteri;Neopterygii;Teleostei;Osteoglossocephalai;Clupeocephala;Euteleosteomorpha;Neoteleostei;Eurypterygia;Ctenosquamata;Acanthomorphata;Euacanthomorphacea;Percomorphaceae;Ovalentaria;Atherinomorphae;Cyprinodontiformes;Aplocheiloidei;Nothobranchiidae;Epiplatys;Epiplatys lamottei	√	√	√	√	√	√	√	√	√	√	√	×
	Epiplatys multifasciatus	NC_044435.1	Vertebrata;Gnathostomata;Teleostomi;Euteleostomi;Actinopterygii;Actinopteri;Neopterygii;Teleostei;Osteoglossocephalai;Clupeocephala;Euteleosteomorpha;Neoteleostei;Eurypterygia;Ctenosquamata;Acanthomorphata;Euacanthomorphacea;Percomorphaceae;Ovalentaria;Atherinomorphae;Cyprinodontiformes;Aplocheiloidei;Nothobranchiidae;Epiplatys;Epiplatys multifasciatus	√	√	√	√	√	√	√	√	√	√	√	×
	Epiplatys spilargyreius	NC_044446.1	Vertebrata;Gnathostomata;Teleostomi;Euteleostomi;Actinopterygii;Actinopteri;Neopterygii;Teleostei;Osteoglossocephalai;Clupeocephala;Euteleosteomorpha;Neoteleostei;Eurypterygia;Ctenosquamata;Acanthomorphata;Euacanthomorphacea;Percomorphaceae;Ovalentaria;Atherinomorphae;Cyprinodontiformes;Aplocheiloidei;Nothobranchiidae;Epiplatys;Epiplatys spilargyreius	√	√	√	√	√	√	√	√	√	√	√	×
	Epiplatys togolensis	NC_044434.1	Vertebrata;Gnathostomata;Teleostomi;Euteleostomi;Actinopterygii;Actinopteri;Neopterygii;Teleostei;Osteoglossocephalai;Clupeocephala;Euteleosteomorpha;Neoteleostei;Eurypterygia;Ctenosquamata;Acanthomorphata;Euacanthomorphacea;Percomorphaceae;Ovalentaria;Atherinomorphae;Cyprinodontiformes;Aplocheiloidei;Nothobranchiidae;Epiplatys;Epiplatys togolensis	√	√	√	√	√	√	√	√	√	√	√	×
	Erilepis zonifer	NC_026889.1	Vertebrata;Gnathostomata;Teleostomi;Euteleostomi;Actinopterygii;Actinopteri;Neopterygii;Teleostei;Osteoglossocephalai;Clupeocephala;Euteleosteomorpha;Neoteleostei;Eurypterygia;Ctenosquamata;Acanthomorphata;Euacanthomorphacea;Percomorphaceae;Eupercaria;Perciformes;Cottioidei;Anoplopomatales;Anoplopomatidae;Erilepis;Erilepis zonifer	√	√	√	√	√	√	√	√	×	√	√	×
	Erimyzon oblongus	MG570411.1	Vertebrata;Gnathostomata;Teleostomi;Euteleostomi;Actinopterygii;Actinopteri;Neopterygii;Teleostei;Osteoglossocephalai;Clupeocephala;Otomorpha;Ostariophysi;Otophysi;Cypriniphysae;Cypriniformes;Catostomoidei;Catostomidae;Erimyzon;Erimyzon oblongus	√	√	√	√	√	√	√	√	√	√	√	×
	Erpetoichthys calabaricus	AY442348.1	Vertebrata;Gnathostomata;Teleostomi;Euteleostomi;Actinopterygii;Cladistia;Polypteriformes;Polypteridae;Erpetoichthys;Erpetoichthys calabaricus	√	√	√	√	√	√	√	√	×	√	√	×
	Erromyzon kalotaenia	KY352769.1	Vertebrata;Gnathostomata;Teleostomi;Euteleostomi;Actinopterygii;Actinopteri;Neopterygii;Teleostei;Osteoglossocephalai;Clupeocephala;Otomorpha;Ostariophysi;Otophysi;Cypriniphysae;Cypriniformes;Cobitoidei;Gastromyzontidae;Erromyzon;Erromyzon kalotaenia	√	√	√	√	√	√	√	√	√	√	√	×
	Erromyzon sinensis	NC_049573.1	Vertebrata;Gnathostomata;Teleostomi;Euteleostomi;Actinopterygii;Actinopteri;Neopterygii;Teleostei;Osteoglossocephalai;Clupeocephala;Otomorpha;Ostariophysi;Otophysi;Cypriniphysae;Cypriniformes;Cobitoidei;Gastromyzontidae;Erromyzon;Erromyzon sinensis	√	√	√	√	√	√	√	√	√	√	√	×
	Esomus metallicus	NC_008660.1	Vertebrata;Gnathostomata;Teleostomi;Euteleostomi;Actinopterygii;Actinopteri;Neopterygii;Teleostei;Osteoglossocephalai;Clupeocephala;Otomorpha;Ostariophysi;Otophysi;Cypriniphysae;Cypriniformes;Cyprinoidei;Danionidae;Esominae;Esomus;Esomus metallicus	√	√	√	√	√	√	√	√	×	√	√	×
	Esox lucius	NC_004593.1	Vertebrata;Gnathostomata;Teleostomi;Euteleostomi;Actinopterygii;Actinopteri;Neopterygii;Teleostei;Osteoglossocephalai;Clupeocephala;Euteleosteomorpha;Protacanthopterygii;Esociformes;Esocidae;Esox;Esox lucius	√	√	√	√	√	√	√	√	×	√	√	×
	Esox reichertii	NC_023269.1	Vertebrata;Gnathostomata;Teleostomi;Euteleostomi;Actinopterygii;Actinopteri;Neopterygii;Teleostei;Osteoglossocephalai;Clupeocephala;Euteleosteomorpha;Protacanthopterygii;Esociformes;Esocidae;Esox;Esox reichertii	√	√	√	√	√	√	√	√	×	√	√	×
	Etheostoma caeruleum	NC_035660.1	Vertebrata;Gnathostomata;Teleostomi;Euteleostomi;Actinopterygii;Actinopteri;Neopterygii;Teleostei;Osteoglossocephalai;Clupeocephala;Euteleosteomorpha;Neoteleostei;Eurypterygia;Ctenosquamata;Acanthomorphata;Euacanthomorphacea;Percomorphaceae;Eupercaria;Perciformes;Percoidei;Percidae;Etheostomatinae;Etheostoma;Oligocephalus;Etheostoma caeruleum	√	√	√	√	√	√	√	√	×	√	√	×
	Etheostoma chuckwachatte	NC_035943.1	Vertebrata;Gnathostomata;Teleostomi;Euteleostomi;Actinopterygii;Actinopteri;Neopterygii;Teleostei;Osteoglossocephalai;Clupeocephala;Euteleosteomorpha;Neoteleostei;Eurypterygia;Ctenosquamata;Acanthomorphata;Euacanthomorphacea;Percomorphaceae;Eupercaria;Perciformes;Percoidei;Percidae;Etheostomatinae;Etheostoma;Nothostoma;Etheostoma chuckwachatte	√	√	√	√	√	√	√	√	×	√	√	×
	Etheostoma flabellare	MH301060.1	Vertebrata;Gnathostomata;Teleostomi;Euteleostomi;Actinopterygii;Actinopteri;Neopterygii;Teleostei;Osteoglossocephalai;Clupeocephala;Euteleosteomorpha;Neoteleostei;Eurypterygia;Ctenosquamata;Acanthomorphata;Euacanthomorphacea;Percomorphaceae;Eupercaria;Perciformes;Percoidei;Percidae;Etheostomatinae;Etheostoma;Catonotus;Etheostoma flabellare	√	√	√	√	√	√	√	√	×	√	√	×
	Etheostoma jessiae	NC_035944.1	Vertebrata;Gnathostomata;Teleostomi;Euteleostomi;Actinopterygii;Actinopteri;Neopterygii;Teleostei;Osteoglossocephalai;Clupeocephala;Euteleosteomorpha;Neoteleostei;Eurypterygia;Ctenosquamata;Acanthomorphata;Euacanthomorphacea;Percomorphaceae;Eupercaria;Perciformes;Percoidei;Percidae;Etheostomatinae;Etheostoma;Doration;Etheostoma jessiae	√	√	√	√	√	√	√	√	×	√	√	×
	Etheostoma nigrum	KT289926.1	Vertebrata;Gnathostomata;Teleostomi;Euteleostomi;Actinopterygii;Actinopteri;Neopterygii;Teleostei;Osteoglossocephalai;Clupeocephala;Euteleosteomorpha;Neoteleostei;Eurypterygia;Ctenosquamata;Acanthomorphata;Euacanthomorphacea;Percomorphaceae;Eupercaria;Perciformes;Percoidei;Percidae;Etheostomatinae;Etheostoma;Boleosoma;Etheostoma nigrum	√	√	√	√	√	√	√	√	×	√	×	×
	Etheostoma okaloosae	NC_035493.1	Vertebrata;Gnathostomata;Teleostomi;Euteleostomi;Actinopterygii;Actinopteri;Neopterygii;Teleostei;Osteoglossocephalai;Clupeocephala;Euteleosteomorpha;Neoteleostei;Eurypterygia;Ctenosquamata;Acanthomorphata;Euacanthomorphacea;Percomorphaceae;Eupercaria;Perciformes;Percoidei;Percidae;Etheostomatinae;Etheostoma;Belophlox;Etheostoma okaloosae	√	√	√	√	√	√	√	√	×	√	√	×
	Etheostoma olmstedi	MH301064.1	Vertebrata;Gnathostomata;Teleostomi;Euteleostomi;Actinopterygii;Actinopteri;Neopterygii;Teleostei;Osteoglossocephalai;Clupeocephala;Euteleosteomorpha;Neoteleostei;Eurypterygia;Ctenosquamata;Acanthomorphata;Euacanthomorphacea;Percomorphaceae;Eupercaria;Perciformes;Percoidei;Percidae;Etheostomatinae;Etheostoma;Boleosoma;Etheostoma olmstedi	√	√	√	√	√	√	√	√	×	√	×	×
	Etheostoma radiosum	AY341348.2	Vertebrata;Gnathostomata;Teleostomi;Euteleostomi;Actinopterygii;Actinopteri;Neopterygii;Teleostei;Osteoglossocephalai;Clupeocephala;Euteleosteomorpha;Neoteleostei;Eurypterygia;Ctenosquamata;Acanthomorphata;Euacanthomorphacea;Percomorphaceae;Eupercaria;Perciformes;Percoidei;Percidae;Etheostomatinae;Etheostoma;Oligocephalus;Etheostoma radiosum	√	√	√	√	√	√	√	√	×	√	×	×
	Etheostoma spectabile	NC_042203.1	Vertebrata;Gnathostomata;Teleostomi;Euteleostomi;Actinopterygii;Actinopteri;Neopterygii;Teleostei;Osteoglossocephalai;Clupeocephala;Euteleosteomorpha;Neoteleostei;Eurypterygia;Ctenosquamata;Acanthomorphata;Euacanthomorphacea;Percomorphaceae;Eupercaria;Perciformes;Percoidei;Percidae;Etheostomatinae;Etheostoma;Oligocephalus;Etheostoma spectabile	√	√	√	√	√	√	√	√	×	√	√	×
	Etheostoma tallapoosae	NC_035867.1	Vertebrata;Gnathostomata;Teleostomi;Euteleostomi;Actinopterygii;Actinopteri;Neopterygii;Teleostei;Osteoglossocephalai;Clupeocephala;Euteleosteomorpha;Neoteleostei;Eurypterygia;Ctenosquamata;Acanthomorphata;Euacanthomorphacea;Percomorphaceae;Eupercaria;Perciformes;Percoidei;Percidae;Etheostomatinae;Etheostoma;Ulocentra;Etheostoma tallapoosae	√	√	√	√	√	√	√	√	×	√	×	×
	Etheostoma trisella	NC_046748.1	Vertebrata;Gnathostomata;Teleostomi;Euteleostomi;Actinopterygii;Actinopteri;Neopterygii;Teleostei;Osteoglossocephalai;Clupeocephala;Euteleosteomorpha;Neoteleostei;Eurypterygia;Ctenosquamata;Acanthomorphata;Euacanthomorphacea;Percomorphaceae;Eupercaria;Perciformes;Percoidei;Percidae;Etheostomatinae;Etheostoma;Ozarka;Etheostoma trisella	√	√	√	√	√	√	√	√	×	√	√	×
	Ethmalosa fimbriata	NC_009582.1	Vertebrata;Gnathostomata;Teleostomi;Euteleostomi;Actinopterygii;Actinopteri;Neopterygii;Teleostei;Osteoglossocephalai;Clupeocephala;Otomorpha;Clupei;Clupeiformes;Clupeoidei;Clupeidae;Alosinae;Ethmalosa;Ethmalosa fimbriata	√	√	√	√	√	√	√	√	×	√	√	×
	Etroplus maculatus	NC_011179.1	Vertebrata;Gnathostomata;Teleostomi;Euteleostomi;Actinopterygii;Actinopteri;Neopterygii;Teleostei;Osteoglossocephalai;Clupeocephala;Euteleosteomorpha;Neoteleostei;Eurypterygia;Ctenosquamata;Acanthomorphata;Euacanthomorphacea;Percomorphaceae;Ovalentaria;Cichlomorphae;Cichliformes;Cichlidae;Etroplinae;Etroplus;Etroplus maculatus	√	√	√	√	√	√	√	√	×	√	√	×
	Etroplus suratensis	KU665487.1	Vertebrata;Gnathostomata;Teleostomi;Euteleostomi;Actinopterygii;Actinopteri;Neopterygii;Teleostei;Osteoglossocephalai;Clupeocephala;Euteleosteomorpha;Neoteleostei;Eurypterygia;Ctenosquamata;Acanthomorphata;Euacanthomorphacea;Percomorphaceae;Ovalentaria;Cichlomorphae;Cichliformes;Cichlidae;Etroplinae;Etroplus;Etroplus suratensis	√	√	√	√	√	√	√	√	×	√	√	×
	Etrumeus teres	NC_009583.1	Vertebrata;Gnathostomata;Teleostomi;Euteleostomi;Actinopterygii;Actinopteri;Neopterygii;Teleostei;Osteoglossocephalai;Clupeocephala;Otomorpha;Clupei;Clupeiformes;Clupeoidei;Dussumieriidae;Etrumeus;Etrumeus teres	√	√	√	√	√	√	√	√	×	√	√	×
	Eubalichthys mosaicus	NC_011953.1	Vertebrata;Gnathostomata;Teleostomi;Euteleostomi;Actinopterygii;Actinopteri;Neopterygii;Teleostei;Osteoglossocephalai;Clupeocephala;Euteleosteomorpha;Neoteleostei;Eurypterygia;Ctenosquamata;Acanthomorphata;Euacanthomorphacea;Percomorphaceae;Eupercaria;Tetraodontiformes;Balistoidea;Monacanthidae;Eubalichthys;Eubalichthys mosaicus	√	√	√	√	√	√	√	√	×	√	√	×
	Euchiloglanis davidi	NC_042210.1	Vertebrata;Gnathostomata;Teleostomi;Euteleostomi;Actinopterygii;Actinopteri;Neopterygii;Teleostei;Osteoglossocephalai;Clupeocephala;Otomorpha;Ostariophysi;Otophysi;Characiphysae;Siluriformes;Siluroidei;Sisoridae;Glyptosterninae;Euchiloglanis;Euchiloglanis davidi	√	√	√	√	√	√	√	√	√	√	√	×
	Euchiloglanis kishinouyei	NC_021598.1	Vertebrata;Gnathostomata;Teleostomi;Euteleostomi;Actinopterygii;Actinopteri;Neopterygii;Teleostei;Osteoglossocephalai;Clupeocephala;Otomorpha;Ostariophysi;Otophysi;Characiphysae;Siluriformes;Siluroidei;Sisoridae;Glyptosterninae;Euchiloglanis;Euchiloglanis kishinouyei	√	√	√	√	√	√	√	√	√	√	√	×
	Eucyclogobius newberryi	MF038886.1	Vertebrata;Gnathostomata;Teleostomi;Euteleostomi;Actinopterygii;Actinopteri;Neopterygii;Teleostei;Osteoglossocephalai;Clupeocephala;Euteleosteomorpha;Neoteleostei;Eurypterygia;Ctenosquamata;Acanthomorphata;Euacanthomorphacea;Percomorphaceae;Gobiaria;Gobiiformes;Gobioidei;Gobiidae;Gobionellinae;Eucyclogobius;Eucyclogobius newberryi	√	√	√	√	√	√	√	√	×	√	√	×
	Eugnathogobius oligactis	NC_033391.1	Vertebrata;Gnathostomata;Teleostomi;Euteleostomi;Actinopterygii;Actinopteri;Neopterygii;Teleostei;Osteoglossocephalai;Clupeocephala;Euteleosteomorpha;Neoteleostei;Eurypterygia;Ctenosquamata;Acanthomorphata;Euacanthomorphacea;Percomorphaceae;Gobiaria;Gobiiformes;Gobioidei;Gobiidae;Gobionellinae;Eugnathogobius;Eugnathogobius oligactis	√	√	√	√	√	√	√	√	×	√	√	×
	Eugnathogobius polylepis	MG744345.1	Vertebrata;Gnathostomata;Teleostomi;Euteleostomi;Actinopterygii;Actinopteri;Neopterygii;Teleostei;Osteoglossocephalai;Clupeocephala;Euteleosteomorpha;Neoteleostei;Eurypterygia;Ctenosquamata;Acanthomorphata;Euacanthomorphacea;Percomorphaceae;Gobiaria;Gobiiformes;Gobioidei;Gobiidae;Gobionellinae;Eugnathogobius;Eugnathogobius polylepis	√	√	√	√	√	√	√	√	√	√	√	×
	Eugnathogobius variegatus	KT075096.1	Vertebrata;Gnathostomata;Teleostomi;Euteleostomi;Actinopterygii;Actinopteri;Neopterygii;Teleostei;Osteoglossocephalai;Clupeocephala;Euteleosteomorpha;Neoteleostei;Eurypterygia;Ctenosquamata;Acanthomorphata;Euacanthomorphacea;Percomorphaceae;Gobiaria;Gobiiformes;Gobioidei;Gobiidae;Gobionellinae;Eugnathogobius;Eugnathogobius variegatus	√	√	√	√	√	√	√	√	√	√	√	×
	Eumegistus illustris	NC_022485.1	Vertebrata;Gnathostomata;Teleostomi;Euteleostomi;Actinopterygii;Actinopteri;Neopterygii;Teleostei;Osteoglossocephalai;Clupeocephala;Euteleosteomorpha;Neoteleostei;Eurypterygia;Ctenosquamata;Acanthomorphata;Euacanthomorphacea;Percomorphaceae;Pelagiaria;Scombriformes;Bramidae;Eumegistus;Eumegistus illustris	√	√	√	√	√	√	√	√	×	√	√	×
	Eurypegasus draconis	NC_010264.1	Vertebrata;Gnathostomata;Teleostomi;Euteleostomi;Actinopterygii;Actinopteri;Neopterygii;Teleostei;Osteoglossocephalai;Clupeocephala;Euteleosteomorpha;Neoteleostei;Eurypterygia;Ctenosquamata;Acanthomorphata;Euacanthomorphacea;Percomorphaceae;Syngnathiaria;Syngnathiformes;Syngnathoidei;Pegasidae;Eurypegasus;Eurypegasus draconis	√	√	√	√	√	√	√	√	×	√	√	×
	Eurypharynx pelecanoides	NC_005299.1	Vertebrata;Gnathostomata;Teleostomi;Euteleostomi;Actinopterygii;Actinopteri;Neopterygii;Teleostei;Elopocephalai;Elopocephala;Elopomorpha;Anguilliformes;Eurypharyngidae;Eurypharynx;Eurypharynx pelecanoides	√	√	√	√	√	√	√	√	×	√	√	×
	Eutaeniophorus festivus	NC_012043.1	Vertebrata;Gnathostomata;Teleostomi;Euteleostomi;Actinopterygii;Actinopteri;Neopterygii;Teleostei;Osteoglossocephalai;Clupeocephala;Euteleosteomorpha;Neoteleostei;Eurypterygia;Ctenosquamata;Acanthomorphata;Euacanthomorphacea;Berycimorphaceae;Beryciformes;Cetomimidae;Eutaeniophorus;Eutaeniophorus festivus	√	√	√	√	√	√	√	√	×	√	√	×
	Eutaeniophorus sp. 033-Miya	NC_004390.1	Vertebrata;Gnathostomata;Teleostomi;Euteleostomi;Actinopterygii;Actinopteri;Neopterygii;Teleostei;Osteoglossocephalai;Clupeocephala;Euteleosteomorpha;Neoteleostei;Eurypterygia;Ctenosquamata;Acanthomorphata;Euacanthomorphacea;Berycimorphaceae;Beryciformes;Cetomimidae;Eutaeniophorus;unclassified Eutaeniophorus;Eutaeniophorus sp. 033-Miya	√	√	√	√	√	√	√	√	√	√	√	×
	Euthynnus affinis	NC_025934.1	Vertebrata;Gnathostomata;Teleostomi;Euteleostomi;Actinopterygii;Actinopteri;Neopterygii;Teleostei;Osteoglossocephalai;Clupeocephala;Euteleosteomorpha;Neoteleostei;Eurypterygia;Ctenosquamata;Acanthomorphata;Euacanthomorphacea;Percomorphaceae;Pelagiaria;Scombriformes;Scombridae;Scombrinae;Thunnini;Euthynnus;Euthynnus affinis	√	√	√	√	√	√	√	√	×	√	√	×
	Euthynnus alletteratus	NC_004530.1	Vertebrata;Gnathostomata;Teleostomi;Euteleostomi;Actinopterygii;Actinopteri;Neopterygii;Teleostei;Osteoglossocephalai;Clupeocephala;Euteleosteomorpha;Neoteleostei;Eurypterygia;Ctenosquamata;Acanthomorphata;Euacanthomorphacea;Percomorphaceae;Pelagiaria;Scombriformes;Scombridae;Scombrinae;Thunnini;Euthynnus;Euthynnus alletteratus	√	√	√	√	√	√	√	√	×	√	√	×
	Eutrigla gurnardus	MN122888.1	Vertebrata;Gnathostomata;Teleostomi;Euteleostomi;Actinopterygii;Actinopteri;Neopterygii;Teleostei;Osteoglossocephalai;Clupeocephala;Euteleosteomorpha;Neoteleostei;Eurypterygia;Ctenosquamata;Acanthomorphata;Euacanthomorphacea;Percomorphaceae;Eupercaria;Perciformes;Triglioidei;Triglidae;Eutrigla;Eutrigla gurnardus	√	√	√	√	√	√	√	√	×	√	√	√
	Evoxymetopon poeyi	NC_022495.1	Vertebrata;Gnathostomata;Teleostomi;Euteleostomi;Actinopterygii;Actinopteri;Neopterygii;Teleostei;Osteoglossocephalai;Clupeocephala;Euteleosteomorpha;Neoteleostei;Eurypterygia;Ctenosquamata;Acanthomorphata;Euacanthomorphacea;Percomorphaceae;Pelagiaria;Scombriformes;Trichiuridae;Lepidopodinae;Evoxymetopon;Evoxymetopon poeyi	√	√	√	√	√	×	√	√	×	√	√	×
	Exocoetus volitans	NC_003184.1	Vertebrata;Gnathostomata;Teleostomi;Euteleostomi;Actinopterygii;Actinopteri;Neopterygii;Teleostei;Osteoglossocephalai;Clupeocephala;Euteleosteomorpha;Neoteleostei;Eurypterygia;Ctenosquamata;Acanthomorphata;Euacanthomorphacea;Percomorphaceae;Ovalentaria;Atherinomorphae;Beloniformes;Belonoidei;Exocoetidae;Exocoetus;Exocoetus volitans	√	√	√	√	√	√	√	√	×	√	√	×
	Exoglossum maxillingua	MG570453.1	Vertebrata;Gnathostomata;Teleostomi;Euteleostomi;Actinopterygii;Actinopteri;Neopterygii;Teleostei;Osteoglossocephalai;Clupeocephala;Otomorpha;Ostariophysi;Otophysi;Cypriniphysae;Cypriniformes;Cyprinoidei;Leuciscidae;Pogonichthyinae;Exoglossum;Exoglossum maxillingua	√	√	√	√	√	√	√	√	√	√	×	×
	Exostoma labiatum	NC_021601.1	Vertebrata;Gnathostomata;Teleostomi;Euteleostomi;Actinopterygii;Actinopteri;Neopterygii;Teleostei;Osteoglossocephalai;Clupeocephala;Otomorpha;Ostariophysi;Otophysi;Characiphysae;Siluriformes;Siluroidei;Sisoridae;Glyptosterninae;Exostoma;Exostoma labiatum	√	√	√	√	√	√	√	√	√	√	√	×
	Exyrias puntang	NC_037143.1	Vertebrata;Gnathostomata;Teleostomi;Euteleostomi;Actinopterygii;Actinopteri;Neopterygii;Teleostei;Osteoglossocephalai;Clupeocephala;Euteleosteomorpha;Neoteleostei;Eurypterygia;Ctenosquamata;Acanthomorphata;Euacanthomorphacea;Percomorphaceae;Gobiaria;Gobiiformes;Gobioidei;Gobiidae;Gobiinae;Exyrias;Exyrias puntang	√	√	√	√	√	√	√	√	√	√	×	×
	Facciolella oxyrhyncha	NC_013621.1	Vertebrata;Gnathostomata;Teleostomi;Euteleostomi;Actinopterygii;Actinopteri;Neopterygii;Teleostei;Elopocephalai;Elopocephala;Elopomorpha;Anguilliformes;Nettastomatidae;Facciolella;Facciolella oxyrhyncha	√	√	√	√	√	√	√	√	×	√	×	×
	Favonigobius gymnauchen	NC_047227.1	Vertebrata;Gnathostomata;Teleostomi;Euteleostomi;Actinopterygii;Actinopteri;Neopterygii;Teleostei;Osteoglossocephalai;Clupeocephala;Euteleosteomorpha;Neoteleostei;Eurypterygia;Ctenosquamata;Acanthomorphata;Euacanthomorphacea;Percomorphaceae;Gobiaria;Gobiiformes;Gobioidei;Gobiidae;Gobiinae;Favonigobius;Favonigobius gymnauchen	√	√	√	√	√	√	√	√	√	√	×	×
	Favonigobius reichei	MN617828.1	Vertebrata;Gnathostomata;Teleostomi;Euteleostomi;Actinopterygii;Actinopteri;Neopterygii;Teleostei;Osteoglossocephalai;Clupeocephala;Euteleosteomorpha;Neoteleostei;Eurypterygia;Ctenosquamata;Acanthomorphata;Euacanthomorphacea;Percomorphaceae;Gobiaria;Gobiiformes;Gobioidei;Gobiidae;Gobiinae;Favonigobius;Favonigobius reichei	√	√	√	√	√	√	√	√	√	√	×	×
	Fistularia commersonii	NC_010274.1	Vertebrata;Gnathostomata;Teleostomi;Euteleostomi;Actinopterygii;Actinopteri;Neopterygii;Teleostei;Osteoglossocephalai;Clupeocephala;Euteleosteomorpha;Neoteleostei;Eurypterygia;Ctenosquamata;Acanthomorphata;Euacanthomorphacea;Percomorphaceae;Syngnathiaria;Syngnathiformes;Syngnathiformes incertae sedis;Fistulariidae;Fistularia;Fistularia commersonii	√	√	√	√	√	×	√	√	×	√	√	×
	Fistularia petimba	NC_024190.1	Vertebrata;Gnathostomata;Teleostomi;Euteleostomi;Actinopterygii;Actinopteri;Neopterygii;Teleostei;Osteoglossocephalai;Clupeocephala;Euteleosteomorpha;Neoteleostei;Eurypterygia;Ctenosquamata;Acanthomorphata;Euacanthomorphacea;Percomorphaceae;Syngnathiaria;Syngnathiformes;Syngnathiformes incertae sedis;Fistulariidae;Fistularia;Fistularia petimba	√	√	√	√	√	√	√	√	×	√	√	×
	Formosania chenyiyui	MK135435.1	Vertebrata;Gnathostomata;Teleostomi;Euteleostomi;Actinopterygii;Actinopteri;Neopterygii;Teleostei;Osteoglossocephalai;Clupeocephala;Otomorpha;Ostariophysi;Otophysi;Cypriniphysae;Cypriniformes;Cobitoidei;Gastromyzontidae;Formosania;Formosania chenyiyui	√	√	√	√	√	√	√	√	√	√	√	×
	Formosania lacustris	NC_001727.1	Vertebrata;Gnathostomata;Teleostomi;Euteleostomi;Actinopterygii;Actinopteri;Neopterygii;Teleostei;Osteoglossocephalai;Clupeocephala;Otomorpha;Ostariophysi;Otophysi;Cypriniphysae;Cypriniformes;Cobitoidei;Gastromyzontidae;Formosania;Formosania lacustris	√	√	√	√	√	×	√	√	√	√	√	×
	Fossorochromis rostratus	KT715809.1	Vertebrata;Gnathostomata;Teleostomi;Euteleostomi;Actinopterygii;Actinopteri;Neopterygii;Teleostei;Osteoglossocephalai;Clupeocephala;Euteleosteomorpha;Neoteleostei;Eurypterygia;Ctenosquamata;Acanthomorphata;Euacanthomorphacea;Percomorphaceae;Ovalentaria;Cichlomorphae;Cichliformes;Cichlidae;African cichlids;Pseudocrenilabrinae;Haplochromini;Fossorochromis;Fossorochromis rostratus	√	√	√	√	√	√	√	√	×	√	√	×
	Fundulopanchax amieti	NC_044432.1	Vertebrata;Gnathostomata;Teleostomi;Euteleostomi;Actinopterygii;Actinopteri;Neopterygii;Teleostei;Osteoglossocephalai;Clupeocephala;Euteleosteomorpha;Neoteleostei;Eurypterygia;Ctenosquamata;Acanthomorphata;Euacanthomorphacea;Percomorphaceae;Ovalentaria;Atherinomorphae;Cyprinodontiformes;Aplocheiloidei;Nothobranchiidae;Fundulopanchax;Fundulopanchax amieti	√	√	√	√	√	√	√	√	×	√	√	×
	Fundulopanchax filamentosus	NC_044450.1	Vertebrata;Gnathostomata;Teleostomi;Euteleostomi;Actinopterygii;Actinopteri;Neopterygii;Teleostei;Osteoglossocephalai;Clupeocephala;Euteleosteomorpha;Neoteleostei;Eurypterygia;Ctenosquamata;Acanthomorphata;Euacanthomorphacea;Percomorphaceae;Ovalentaria;Atherinomorphae;Cyprinodontiformes;Aplocheiloidei;Nothobranchiidae;Fundulopanchax;Fundulopanchax filamentosus	√	√	√	√	√	√	√	√	×	√	√	×
	Fundulopanchax gardneri	NC_044442.1	Vertebrata;Gnathostomata;Teleostomi;Euteleostomi;Actinopterygii;Actinopteri;Neopterygii;Teleostei;Osteoglossocephalai;Clupeocephala;Euteleosteomorpha;Neoteleostei;Eurypterygia;Ctenosquamata;Acanthomorphata;Euacanthomorphacea;Percomorphaceae;Ovalentaria;Atherinomorphae;Cyprinodontiformes;Aplocheiloidei;Nothobranchiidae;Fundulopanchax;Fundulopanchax gardneri	√	√	√	√	√	√	√	√	×	√	√	×
	Fundulopanchax scheeli	NC_044436.1	Vertebrata;Gnathostomata;Teleostomi;Euteleostomi;Actinopterygii;Actinopteri;Neopterygii;Teleostei;Osteoglossocephalai;Clupeocephala;Euteleosteomorpha;Neoteleostei;Eurypterygia;Ctenosquamata;Acanthomorphata;Euacanthomorphacea;Percomorphaceae;Ovalentaria;Atherinomorphae;Cyprinodontiformes;Aplocheiloidei;Nothobranchiidae;Fundulopanchax;Fundulopanchax scheeli	√	√	√	√	√	√	√	√	×	√	√	×
	Fundulopanchax sjostedti	NC_044444.1	Vertebrata;Gnathostomata;Teleostomi;Euteleostomi;Actinopterygii;Actinopteri;Neopterygii;Teleostei;Osteoglossocephalai;Clupeocephala;Euteleosteomorpha;Neoteleostei;Eurypterygia;Ctenosquamata;Acanthomorphata;Euacanthomorphacea;Percomorphaceae;Ovalentaria;Atherinomorphae;Cyprinodontiformes;Aplocheiloidei;Nothobranchiidae;Fundulopanchax;Fundulopanchax sjostedti	√	√	√	√	√	√	√	√	×	√	√	×
	Fundulus diaphanus	FJ445395.1	Vertebrata;Gnathostomata;Teleostomi;Euteleostomi;Actinopterygii;Actinopteri;Neopterygii;Teleostei;Osteoglossocephalai;Clupeocephala;Euteleosteomorpha;Neoteleostei;Eurypterygia;Ctenosquamata;Acanthomorphata;Euacanthomorphacea;Percomorphaceae;Ovalentaria;Atherinomorphae;Cyprinodontiformes;Cyprinodontoidei;Fundulidae;Fundulus;Fundulus diaphanus	√	√	√	√	×	√	√	√	×	√	√	×
	Fundulus grandis	FJ445397.1	Vertebrata;Gnathostomata;Teleostomi;Euteleostomi;Actinopterygii;Actinopteri;Neopterygii;Teleostei;Osteoglossocephalai;Clupeocephala;Euteleosteomorpha;Neoteleostei;Eurypterygia;Ctenosquamata;Acanthomorphata;Euacanthomorphacea;Percomorphaceae;Ovalentaria;Atherinomorphae;Cyprinodontiformes;Cyprinodontoidei;Fundulidae;Fundulus;Fundulus grandis	√	√	√	√	×	√	√	√	×	√	√	×
	Fundulus heteroclitus	FJ445403.1	Vertebrata;Gnathostomata;Teleostomi;Euteleostomi;Actinopterygii;Actinopteri;Neopterygii;Teleostei;Osteoglossocephalai;Clupeocephala;Euteleosteomorpha;Neoteleostei;Eurypterygia;Ctenosquamata;Acanthomorphata;Euacanthomorphacea;Percomorphaceae;Ovalentaria;Atherinomorphae;Cyprinodontiformes;Cyprinodontoidei;Fundulidae;Fundulus;Fundulus heteroclitus	√	√	√	√	×	√	√	√	×	√	√	×
	Fundulus notatus	NC_028293.1	Vertebrata;Gnathostomata;Teleostomi;Euteleostomi;Actinopterygii;Actinopteri;Neopterygii;Teleostei;Osteoglossocephalai;Clupeocephala;Euteleosteomorpha;Neoteleostei;Eurypterygia;Ctenosquamata;Acanthomorphata;Euacanthomorphacea;Percomorphaceae;Ovalentaria;Atherinomorphae;Cyprinodontiformes;Cyprinodontoidei;Fundulidae;Fundulus;Fundulus notatus	√	√	√	√	×	√	√	√	×	√	√	×
	Fundulus olivaceus	NC_011380.1	Vertebrata;Gnathostomata;Teleostomi;Euteleostomi;Actinopterygii;Actinopteri;Neopterygii;Teleostei;Osteoglossocephalai;Clupeocephala;Euteleosteomorpha;Neoteleostei;Eurypterygia;Ctenosquamata;Acanthomorphata;Euacanthomorphacea;Percomorphaceae;Ovalentaria;Atherinomorphae;Cyprinodontiformes;Cyprinodontoidei;Fundulidae;Fundulus;Fundulus olivaceus	√	√	√	√	×	√	√	√	×	√	√	×
	Gadus chalcogrammus	MH035604.1	Vertebrata;Gnathostomata;Teleostomi;Euteleostomi;Actinopterygii;Actinopteri;Neopterygii;Teleostei;Osteoglossocephalai;Clupeocephala;Euteleosteomorpha;Neoteleostei;Eurypterygia;Ctenosquamata;Acanthomorphata;Paracanthopterygii;Zeiogadaria;Gadariae;Gadiformes;Gadoidei;Gadidae;Gadus;Gadus chalcogrammus	√	√	×	√	√	√	√	√	×	√	√	×
	Gadus macrocephalus	NC_036931.1	Vertebrata;Gnathostomata;Teleostomi;Euteleostomi;Actinopterygii;Actinopteri;Neopterygii;Teleostei;Osteoglossocephalai;Clupeocephala;Euteleosteomorpha;Neoteleostei;Eurypterygia;Ctenosquamata;Acanthomorphata;Paracanthopterygii;Zeiogadaria;Gadariae;Gadiformes;Gadoidei;Gadidae;Gadus;Gadus macrocephalus	√	√	×	√	√	√	√	√	×	√	√	×
	Gadus morhua	MN122852.1	Vertebrata;Gnathostomata;Teleostomi;Euteleostomi;Actinopterygii;Actinopteri;Neopterygii;Teleostei;Osteoglossocephalai;Clupeocephala;Euteleosteomorpha;Neoteleostei;Eurypterygia;Ctenosquamata;Acanthomorphata;Paracanthopterygii;Zeiogadaria;Gadariae;Gadiformes;Gadoidei;Gadidae;Gadus;Gadus morhua	√	√	×	√	√	√	√	√	×	√	√	×
	Gadus ogac	DQ356941.1	Vertebrata;Gnathostomata;Teleostomi;Euteleostomi;Actinopterygii;Actinopteri;Neopterygii;Teleostei;Osteoglossocephalai;Clupeocephala;Euteleosteomorpha;Neoteleostei;Eurypterygia;Ctenosquamata;Acanthomorphata;Paracanthopterygii;Zeiogadaria;Gadariae;Gadiformes;Gadoidei;Gadidae;Gadus;Gadus ogac	√	√	×	√	√	√	√	√	×	√	√	×
	Gagata dolichonema	NC_021596.1	Vertebrata;Gnathostomata;Teleostomi;Euteleostomi;Actinopterygii;Actinopteri;Neopterygii;Teleostei;Osteoglossocephalai;Clupeocephala;Otomorpha;Ostariophysi;Otophysi;Characiphysae;Siluriformes;Siluroidei;Sisoridae;Sisorinae;Gagata;Gagata dolichonema	√	√	√	√	√	√	√	√	√	√	√	×
	Galaxias gollumoides	HM106487.1	Vertebrata;Gnathostomata;Teleostomi;Euteleostomi;Actinopterygii;Actinopteri;Neopterygii;Teleostei;Osteoglossocephalai;Clupeocephala;Euteleosteomorpha;Protacanthopterygii;Galaxiiformes;Galaxiidae;Galaxiinae;Galaxiini;Galaxias;Galaxias gollumoides	√	√	√	√	√	√	√	√	×	√	×	×
	Galaxias maculatus	NC_004594.1	Vertebrata;Gnathostomata;Teleostomi;Euteleostomi;Actinopterygii;Actinopteri;Neopterygii;Teleostei;Osteoglossocephalai;Clupeocephala;Euteleosteomorpha;Protacanthopterygii;Galaxiiformes;Galaxiidae;Galaxiinae;Galaxiini;Galaxias;Galaxias maculatus	√	√	√	√	√	√	√	√	×	√	√	×
	Galaxias platei	NC_029739.1	Vertebrata;Gnathostomata;Teleostomi;Euteleostomi;Actinopterygii;Actinopteri;Neopterygii;Teleostei;Osteoglossocephalai;Clupeocephala;Euteleosteomorpha;Protacanthopterygii;Galaxiiformes;Galaxiidae;Galaxiinae;Galaxiini;Galaxias;Galaxias platei	√	√	√	√	√	√	√	√	×	√	×	×
	Galaxias sp. 'southern'	HM106488.1	Vertebrata;Gnathostomata;Teleostomi;Euteleostomi;Actinopterygii;Actinopteri;Neopterygii;Teleostei;Osteoglossocephalai;Clupeocephala;Euteleosteomorpha;Protacanthopterygii;Galaxiiformes;Galaxiidae;Galaxiinae;Galaxiini;Galaxias;unclassified Galaxias;Galaxias sp. 'southern'	√	√	√	√	√	√	√	√	×	√	×	×
	Galaxias truttaceus	NC_029890.1	Vertebrata;Gnathostomata;Teleostomi;Euteleostomi;Actinopterygii;Actinopteri;Neopterygii;Teleostei;Osteoglossocephalai;Clupeocephala;Euteleosteomorpha;Protacanthopterygii;Galaxiiformes;Galaxiidae;Galaxiinae;Galaxiini;Galaxias;Galaxias truttaceus	√	√	√	√	√	√	√	√	×	√	×	×
	Galaxiella nigrostriata	NC_008448.1	Vertebrata;Gnathostomata;Teleostomi;Euteleostomi;Actinopterygii;Actinopteri;Neopterygii;Teleostei;Osteoglossocephalai;Clupeocephala;Euteleosteomorpha;Protacanthopterygii;Galaxiiformes;Galaxiidae;Galaxiinae;Galaxiini;Galaxiella;Galaxiella nigrostriata	√	√	√	√	√	√	√	√	×	√	√	×
	Gambusia affinis	NC_004388.1	Vertebrata;Gnathostomata;Teleostomi;Euteleostomi;Actinopterygii;Actinopteri;Neopterygii;Teleostei;Osteoglossocephalai;Clupeocephala;Euteleosteomorpha;Neoteleostei;Eurypterygia;Ctenosquamata;Acanthomorphata;Euacanthomorphacea;Percomorphaceae;Ovalentaria;Atherinomorphae;Cyprinodontiformes;Cyprinodontoidei;Poeciliidae;Poeciliinae;Gambusia;Gambusia affinis	√	√	√	√	√	√	√	√	×	√	√	×
	Gambusia holbrooki	NC_028274.1	Vertebrata;Gnathostomata;Teleostomi;Euteleostomi;Actinopterygii;Actinopteri;Neopterygii;Teleostei;Osteoglossocephalai;Clupeocephala;Euteleosteomorpha;Neoteleostei;Eurypterygia;Ctenosquamata;Acanthomorphata;Euacanthomorphacea;Percomorphaceae;Ovalentaria;Atherinomorphae;Cyprinodontiformes;Cyprinodontoidei;Poeciliidae;Poeciliinae;Gambusia;Gambusia holbrooki	√	√	√	√	√	√	√	√	×	√	√	×
	Garra imberba	NC_025562.1	Vertebrata;Gnathostomata;Teleostomi;Euteleostomi;Actinopterygii;Actinopteri;Neopterygii;Teleostei;Osteoglossocephalai;Clupeocephala;Otomorpha;Ostariophysi;Otophysi;Cypriniphysae;Cypriniformes;Cyprinoidei;Cyprinidae;Labeoninae;Garrini;Ageneiogarra;Ageneiogarra imberba	√	√	√	√	√	√	√	√	√	√	√	×
	Garra kempi	KX670381.1	Vertebrata;Gnathostomata;Teleostomi;Euteleostomi;Actinopterygii;Actinopteri;Neopterygii;Teleostei;Osteoglossocephalai;Clupeocephala;Otomorpha;Ostariophysi;Otophysi;Cypriniphysae;Cypriniformes;Cyprinoidei;Cyprinidae;Labeoninae;Garrini;Garra;Garra kempi	√	√	√	√	√	√	√	√	√	√	√	×
	Garra orientalis	NC_021935.1	Vertebrata;Gnathostomata;Teleostomi;Euteleostomi;Actinopterygii;Actinopteri;Neopterygii;Teleostei;Osteoglossocephalai;Clupeocephala;Otomorpha;Ostariophysi;Otophysi;Cypriniphysae;Cypriniformes;Cyprinoidei;Cyprinidae;Labeoninae;Garrini;Garra;Garra orientalis	√	√	√	√	√	√	√	√	√	√	√	×
	Garra pingi pingi	MF958973.1	Vertebrata;Gnathostomata;Teleostomi;Euteleostomi;Actinopterygii;Actinopteri;Neopterygii;Teleostei;Osteoglossocephalai;Clupeocephala;Otomorpha;Ostariophysi;Otophysi;Cypriniphysae;Cypriniformes;Cyprinoidei;Cyprinidae;Labeoninae;Garrini;Garra;Garra pingi;Garra pingi pingi	√	√	√	√	√	√	√	√	√	√	√	×
	Garra qiaojiensis	NC_028403.1	Vertebrata;Gnathostomata;Teleostomi;Euteleostomi;Actinopterygii;Actinopteri;Neopterygii;Teleostei;Osteoglossocephalai;Clupeocephala;Otomorpha;Ostariophysi;Otophysi;Cypriniphysae;Cypriniformes;Cyprinoidei;Cyprinidae;Labeoninae;Garrini;Garra;Garra qiaojiensis	√	√	√	√	√	√	√	√	√	√	×	×
	Garra salweenica	NC_033389.1	Vertebrata;Gnathostomata;Teleostomi;Euteleostomi;Actinopterygii;Actinopteri;Neopterygii;Teleostei;Osteoglossocephalai;Clupeocephala;Otomorpha;Ostariophysi;Otophysi;Cypriniphysae;Cypriniformes;Cyprinoidei;Cyprinidae;Labeoninae;Garrini;Garra;Garra salweenica	√	√	√	√	√	√	√	√	√	√	√	×
	Garra tibetana	NC_045032.1	Vertebrata;Gnathostomata;Teleostomi;Euteleostomi;Actinopterygii;Actinopteri;Neopterygii;Teleostei;Osteoglossocephalai;Clupeocephala;Otomorpha;Ostariophysi;Otophysi;Cypriniphysae;Cypriniformes;Cyprinoidei;Cyprinidae;Labeoninae;Garrini;Garra;Garra tibetana	√	√	√	√	√	√	√	√	√	√	√	×
	Gasterochisma melampus	HQ425781.1	Vertebrata;Gnathostomata;Teleostomi;Euteleostomi;Actinopterygii;Actinopteri;Neopterygii;Teleostei;Osteoglossocephalai;Clupeocephala;Euteleosteomorpha;Neoteleostei;Eurypterygia;Ctenosquamata;Acanthomorphata;Euacanthomorphacea;Percomorphaceae;Pelagiaria;Scombriformes;Scombridae;Gasterochismatinae;Gasterochisma;Gasterochisma melampus	√	√	√	√	√	√	√	√	×	√	√	×
	Gasterosteus aculeatus	NC_041244.1	Vertebrata;Gnathostomata;Teleostomi;Euteleostomi;Actinopterygii;Actinopteri;Neopterygii;Teleostei;Osteoglossocephalai;Clupeocephala;Euteleosteomorpha;Neoteleostei;Eurypterygia;Ctenosquamata;Acanthomorphata;Euacanthomorphacea;Percomorphaceae;Eupercaria;Perciformes;Cottioidei;Gasterosteales;Gasterosteidae;Gasterosteus;Gasterosteus aculeatus	√	√	√	√	√	√	√	√	×	√	√	×
	Gasterosteus wheatlandi	NC_011570.1	Vertebrata;Gnathostomata;Teleostomi;Euteleostomi;Actinopterygii;Actinopteri;Neopterygii;Teleostei;Osteoglossocephalai;Clupeocephala;Euteleosteomorpha;Neoteleostei;Eurypterygia;Ctenosquamata;Acanthomorphata;Euacanthomorphacea;Percomorphaceae;Eupercaria;Perciformes;Cottioidei;Gasterosteales;Gasterosteidae;Gasterosteus;Gasterosteus wheatlandi	√	√	√	√	√	√	√	√	×	√	√	×
	Genicanthus bellus	NC_027597.1	Vertebrata;Gnathostomata;Teleostomi;Euteleostomi;Actinopterygii;Actinopteri;Neopterygii;Teleostei;Osteoglossocephalai;Clupeocephala;Euteleosteomorpha;Neoteleostei;Eurypterygia;Ctenosquamata;Acanthomorphata;Euacanthomorphacea;Percomorphaceae;Eupercaria;Eupercaria incertae sedis;Pomacanthidae;Genicanthus;Genicanthus bellus	√	√	√	√	√	√	√	√	×	√	√	×
	Genicanthus lamarck	NC_027972.1	Vertebrata;Gnathostomata;Teleostomi;Euteleostomi;Actinopterygii;Actinopteri;Neopterygii;Teleostei;Osteoglossocephalai;Clupeocephala;Euteleosteomorpha;Neoteleostei;Eurypterygia;Ctenosquamata;Acanthomorphata;Euacanthomorphacea;Percomorphaceae;Eupercaria;Eupercaria incertae sedis;Pomacanthidae;Genicanthus;Genicanthus lamarck	√	√	√	√	√	√	√	√	×	√	√	×
	Genicanthus melanospilos	NC_027967.1	Vertebrata;Gnathostomata;Teleostomi;Euteleostomi;Actinopterygii;Actinopteri;Neopterygii;Teleostei;Osteoglossocephalai;Clupeocephala;Euteleosteomorpha;Neoteleostei;Eurypterygia;Ctenosquamata;Acanthomorphata;Euacanthomorphacea;Percomorphaceae;Eupercaria;Eupercaria incertae sedis;Pomacanthidae;Genicanthus;Genicanthus melanospilos	√	√	√	√	√	√	√	√	×	√	√	×
	Genicanthus semifasciatus	NC_027596.1	Vertebrata;Gnathostomata;Teleostomi;Euteleostomi;Actinopterygii;Actinopteri;Neopterygii;Teleostei;Osteoglossocephalai;Clupeocephala;Euteleosteomorpha;Neoteleostei;Eurypterygia;Ctenosquamata;Acanthomorphata;Euacanthomorphacea;Percomorphaceae;Eupercaria;Eupercaria incertae sedis;Pomacanthidae;Genicanthus;Genicanthus semifasciatus	√	√	√	√	√	√	√	√	×	√	√	×
	Genyochromis mento	NC_018562.1	Vertebrata;Gnathostomata;Teleostomi;Euteleostomi;Actinopterygii;Actinopteri;Neopterygii;Teleostei;Osteoglossocephalai;Clupeocephala;Euteleosteomorpha;Neoteleostei;Eurypterygia;Ctenosquamata;Acanthomorphata;Euacanthomorphacea;Percomorphaceae;Ovalentaria;Cichlomorphae;Cichliformes;Cichlidae;African cichlids;Pseudocrenilabrinae;Haplochromini;Genyochromis;Genyochromis mento	√	√	√	√	√	√	√	√	×	√	√	×
	Genyomyrus donnyi	NC_015086.1	Vertebrata;Gnathostomata;Teleostomi;Euteleostomi;Actinopterygii;Actinopteri;Neopterygii;Teleostei;Osteoglossocephalai;Osteoglossocephala;Osteoglossomorpha;Osteoglossiformes;Mormyridae;Genyomyrus;Genyomyrus donnyi	√	√	√	√	√	√	√	√	√	√	√	×
	Geophagus brasiliensis	NC_031181.1	Vertebrata;Gnathostomata;Teleostomi;Euteleostomi;Actinopterygii;Actinopteri;Neopterygii;Teleostei;Osteoglossocephalai;Clupeocephala;Euteleosteomorpha;Neoteleostei;Eurypterygia;Ctenosquamata;Acanthomorphata;Euacanthomorphacea;Percomorphaceae;Ovalentaria;Cichlomorphae;Cichliformes;Cichlidae;New World cichlids;Geophaginae;Geophagini;Geophagus;Geophagus brasiliensis	√	√	√	√	√	√	√	√	×	√	√	×
	Geophagus steindachneri	NC_033545.1	Vertebrata;Gnathostomata;Teleostomi;Euteleostomi;Actinopterygii;Actinopteri;Neopterygii;Teleostei;Osteoglossocephalai;Clupeocephala;Euteleosteomorpha;Neoteleostei;Eurypterygia;Ctenosquamata;Acanthomorphata;Euacanthomorphacea;Percomorphaceae;Ovalentaria;Cichlomorphae;Cichliformes;Cichlidae;New World cichlids;Geophaginae;Geophagini;Geophagus;Geophagus steindachneri	√	√	√	√	√	√	√	√	×	√	√	×
	Gephyrocharax atracaudatus	NC_042882.1	Vertebrata;Gnathostomata;Teleostomi;Euteleostomi;Actinopterygii;Actinopteri;Neopterygii;Teleostei;Osteoglossocephalai;Clupeocephala;Otomorpha;Ostariophysi;Otophysi;Characiphysae;Characiformes;Characoidei;Characidae;Glandulocaudinae;Gephyrocharax;Gephyrocharax atracaudatus	√	√	√	√	√	√	√	√	×	√	√	×
	Gerres decacanthus	MT023107.1	Vertebrata;Gnathostomata;Teleostomi;Euteleostomi;Actinopterygii;Actinopteri;Neopterygii;Teleostei;Osteoglossocephalai;Clupeocephala;Euteleosteomorpha;Neoteleostei;Eurypterygia;Ctenosquamata;Acanthomorphata;Euacanthomorphacea;Percomorphaceae;Eupercaria;Gerreiformes;Gerreidae;Gerres;Gerres decacanthus	√	√	√	√	√	√	√	√	×	√	√	×
	Gerres erythrourus	MN075144.1	Vertebrata;Gnathostomata;Teleostomi;Euteleostomi;Actinopterygii;Actinopteri;Neopterygii;Teleostei;Osteoglossocephalai;Clupeocephala;Euteleosteomorpha;Neoteleostei;Eurypterygia;Ctenosquamata;Acanthomorphata;Euacanthomorphacea;Percomorphaceae;Eupercaria;Gerreiformes;Gerreidae;Gerres;Gerres erythrourus	√	√	√	√	√	√	√	√	×	√	√	×
	Gerres filamentosus	MG587039.1	Vertebrata;Gnathostomata;Teleostomi;Euteleostomi;Actinopterygii;Actinopteri;Neopterygii;Teleostei;Osteoglossocephalai;Clupeocephala;Euteleosteomorpha;Neoteleostei;Eurypterygia;Ctenosquamata;Acanthomorphata;Euacanthomorphacea;Percomorphaceae;Eupercaria;Gerreiformes;Gerreidae;Gerres;Gerres filamentosus	√	√	√	√	√	√	√	√	×	√	√	×
	Gigantactis vanhoeffeni	NC_013885.1	Vertebrata;Gnathostomata;Teleostomi;Euteleostomi;Actinopterygii;Actinopteri;Neopterygii;Teleostei;Osteoglossocephalai;Clupeocephala;Euteleosteomorpha;Neoteleostei;Eurypterygia;Ctenosquamata;Acanthomorphata;Euacanthomorphacea;Percomorphaceae;Eupercaria;Lophiiformes;Ceratioidei;Gigantactinidae;Gigantactis;Gigantactis vanhoeffeni	√	√	√	√	√	√	√	√	×	√	√	×
	Gila conspersa	NC_013761.1	Vertebrata;Gnathostomata;Teleostomi;Euteleostomi;Actinopterygii;Actinopteri;Neopterygii;Teleostei;Osteoglossocephalai;Clupeocephala;Otomorpha;Ostariophysi;Otophysi;Cypriniphysae;Cypriniformes;Cyprinoidei;Leuciscidae;Laviniinae;Gila;Gila conspersa	√	√	√	√	√	√	√	√	√	√	√	√
	Gila elegans	MT364326.1	Vertebrata;Gnathostomata;Teleostomi;Euteleostomi;Actinopterygii;Actinopteri;Neopterygii;Teleostei;Osteoglossocephalai;Clupeocephala;Otomorpha;Ostariophysi;Otophysi;Cypriniphysae;Cypriniformes;Cyprinoidei;Leuciscidae;Laviniinae;Gila;Gila elegans	√	√	√	√	√	√	√	√	√	√	√	√
	Gila robusta	DQ536424.1	Vertebrata;Gnathostomata;Teleostomi;Euteleostomi;Actinopterygii;Actinopteri;Neopterygii;Teleostei;Osteoglossocephalai;Clupeocephala;Otomorpha;Ostariophysi;Otophysi;Cypriniphysae;Cypriniformes;Cyprinoidei;Leuciscidae;Laviniinae;Gila;Gila robusta	√	√	√	√	√	√	√	√	√	√	√	×
	Gillichthys mirabilis	FJ211845.1	Vertebrata;Gnathostomata;Teleostomi;Euteleostomi;Actinopterygii;Actinopteri;Neopterygii;Teleostei;Osteoglossocephalai;Clupeocephala;Euteleosteomorpha;Neoteleostei;Eurypterygia;Ctenosquamata;Acanthomorphata;Euacanthomorphacea;Percomorphaceae;Gobiaria;Gobiiformes;Gobioidei;Gobiidae;Gobionellinae;Gillichthys;Gillichthys mirabilis	√	√	√	√	√	√	√	√	√	√	×	×
	Gillichthys seta	NC_012908.1	Vertebrata;Gnathostomata;Teleostomi;Euteleostomi;Actinopterygii;Actinopteri;Neopterygii;Teleostei;Osteoglossocephalai;Clupeocephala;Euteleosteomorpha;Neoteleostei;Eurypterygia;Ctenosquamata;Acanthomorphata;Euacanthomorphacea;Percomorphaceae;Gobiaria;Gobiiformes;Gobioidei;Gobiidae;Gobionellinae;Gillichthys;Gillichthys seta	√	√	√	√	√	√	√	√	√	√	×	×
	Girella leonina	KX494865.1	Vertebrata;Gnathostomata;Teleostomi;Euteleostomi;Actinopterygii;Actinopteri;Neopterygii;Teleostei;Osteoglossocephalai;Clupeocephala;Euteleosteomorpha;Neoteleostei;Eurypterygia;Ctenosquamata;Acanthomorphata;Euacanthomorphacea;Percomorphaceae;Eupercaria;Centrarchiformes;Terapontoidei;Girellidae;Girella;Girella leonina	√	√	√	√	√	√	√	√	×	√	√	×
	Girella melanichthys	NC_046940.1	Vertebrata;Gnathostomata;Teleostomi;Euteleostomi;Actinopterygii;Actinopteri;Neopterygii;Teleostei;Osteoglossocephalai;Clupeocephala;Euteleosteomorpha;Neoteleostei;Eurypterygia;Ctenosquamata;Acanthomorphata;Euacanthomorphacea;Percomorphaceae;Eupercaria;Centrarchiformes;Terapontoidei;Girellidae;Girella;Girella melanichthys	√	√	√	√	√	√	√	√	×	√	√	×
	Girella punctata	NC_013137.1	Vertebrata;Gnathostomata;Teleostomi;Euteleostomi;Actinopterygii;Actinopteri;Neopterygii;Teleostei;Osteoglossocephalai;Clupeocephala;Euteleosteomorpha;Neoteleostei;Eurypterygia;Ctenosquamata;Acanthomorphata;Euacanthomorphacea;Percomorphaceae;Eupercaria;Centrarchiformes;Terapontoidei;Girellidae;Girella;Girella punctata	√	√	√	√	√	√	√	√	×	√	√	×
	Glaridoglanis andersonii	NC_021600.1	Vertebrata;Gnathostomata;Teleostomi;Euteleostomi;Actinopterygii;Actinopteri;Neopterygii;Teleostei;Osteoglossocephalai;Clupeocephala;Otomorpha;Ostariophysi;Otophysi;Characiphysae;Siluriformes;Siluroidei;Sisoridae;Glyptosterninae;Glaridoglanis;Glaridoglanis andersonii	√	√	√	√	√	√	√	√	√	√	√	×
	Glossanodon semifasciatus	NC_004595.1	Vertebrata;Gnathostomata;Teleostomi;Euteleostomi;Actinopterygii;Actinopteri;Neopterygii;Teleostei;Osteoglossocephalai;Clupeocephala;Euteleosteomorpha;Protacanthopterygii;Argentiniformes;Argentinidae;Glossanodon;Glossanodon semifasciatus	√	√	√	√	√	√	√	√	×	√	√	×
	Glossogobius circumspectus	NC_018824.1	Vertebrata;Gnathostomata;Teleostomi;Euteleostomi;Actinopterygii;Actinopteri;Neopterygii;Teleostei;Osteoglossocephalai;Clupeocephala;Euteleosteomorpha;Neoteleostei;Eurypterygia;Ctenosquamata;Acanthomorphata;Euacanthomorphacea;Percomorphaceae;Gobiaria;Gobiiformes;Gobioidei;Gobiidae;Gobiinae;Glossogobius;Glossogobius circumspectus	√	√	√	√	√	√	√	√	√	√	√	×
	Glossogobius giuris	MG680939.1	Vertebrata;Gnathostomata;Teleostomi;Euteleostomi;Actinopterygii;Actinopteri;Neopterygii;Teleostei;Osteoglossocephalai;Clupeocephala;Euteleosteomorpha;Neoteleostei;Eurypterygia;Ctenosquamata;Acanthomorphata;Euacanthomorphacea;Percomorphaceae;Gobiaria;Gobiiformes;Gobioidei;Gobiidae;Gobiinae;Glossogobius;Glossogobius giuris	√	√	√	√	√	√	√	√	√	√	×	×
	Glossogobius olivaceus	JQ001860.1	Vertebrata;Gnathostomata;Teleostomi;Euteleostomi;Actinopterygii;Actinopteri;Neopterygii;Teleostei;Osteoglossocephalai;Clupeocephala;Euteleosteomorpha;Neoteleostei;Eurypterygia;Ctenosquamata;Acanthomorphata;Euacanthomorphacea;Percomorphaceae;Gobiaria;Gobiiformes;Gobioidei;Gobiidae;Gobiinae;Glossogobius;Glossogobius olivaceus	√	√	√	√	√	√	√	√	√	√	√	×
	Glossolepis incisus	NC_028090.1	Vertebrata;Gnathostomata;Teleostomi;Euteleostomi;Actinopterygii;Actinopteri;Neopterygii;Teleostei;Osteoglossocephalai;Clupeocephala;Euteleosteomorpha;Neoteleostei;Eurypterygia;Ctenosquamata;Acanthomorphata;Euacanthomorphacea;Percomorphaceae;Ovalentaria;Atherinomorphae;Atheriniformes;Melanotaeniidae;Glossolepis;Glossolepis incisus	√	√	√	√	√	√	√	√	×	√	×	×
	Glyptosternon maculatum	NC_021597.1	Vertebrata;Gnathostomata;Teleostomi;Euteleostomi;Actinopterygii;Actinopteri;Neopterygii;Teleostei;Osteoglossocephalai;Clupeocephala;Otomorpha;Ostariophysi;Otophysi;Characiphysae;Siluriformes;Siluroidei;Sisoridae;Glyptosterninae;Glyptosternon;Glyptosternon maculatum	√	√	√	√	√	√	√	√	√	√	√	×
	Glyptothorax annandalei	NC_045214.1	Vertebrata;Gnathostomata;Teleostomi;Euteleostomi;Actinopterygii;Actinopteri;Neopterygii;Teleostei;Osteoglossocephalai;Clupeocephala;Otomorpha;Ostariophysi;Otophysi;Characiphysae;Siluriformes;Siluroidei;Sisoridae;Glyptosterninae;Glyptothorax;Glyptothorax annandalei	√	√	√	√	√	√	√	√	√	√	√	×
	Glyptothorax cavia	NC_034921.1	Vertebrata;Gnathostomata;Teleostomi;Euteleostomi;Actinopterygii;Actinopteri;Neopterygii;Teleostei;Osteoglossocephalai;Clupeocephala;Otomorpha;Ostariophysi;Otophysi;Characiphysae;Siluriformes;Siluroidei;Sisoridae;Glyptosterninae;Glyptothorax;Glyptothorax cavia	√	√	√	√	√	√	√	√	√	√	√	×
	Glyptothorax deqinensis	MN082046.1	Vertebrata;Gnathostomata;Teleostomi;Euteleostomi;Actinopterygii;Actinopteri;Neopterygii;Teleostei;Osteoglossocephalai;Clupeocephala;Otomorpha;Ostariophysi;Otophysi;Characiphysae;Siluriformes;Siluroidei;Sisoridae;Glyptosterninae;Glyptothorax;Glyptothorax deqinensis	√	√	√	√	√	√	√	√	√	√	√	×
	Glyptothorax fokiensis fokiensis	NC_018769.1	Vertebrata;Gnathostomata;Teleostomi;Euteleostomi;Actinopterygii;Actinopteri;Neopterygii;Teleostei;Osteoglossocephalai;Clupeocephala;Otomorpha;Ostariophysi;Otophysi;Characiphysae;Siluriformes;Siluroidei;Sisoridae;Glyptosterninae;Glyptothorax;Glyptothorax fokiensis;Glyptothorax fokiensis fokiensis	√	√	√	√	√	√	√	√	√	√	×	×
[truncated: 5,354 more rows]
