# Supplementary material for: VertU: universal multilocus primer sets for eDNA metabarcoding of vertebrate diversity, evaluated by both artificial and natural cases
Source: Frontiers journal article supplement (doi:10.3389/fevo.2023.1164206), 2023-06-19
Supplement: Table_4.XLSX [file Table_4.XLSX]

## Sheet: mock-even_H
Higher classification	Species	mock-even_H
		V12S-U(50)	V16S-U(50)	VCOI-U(50)	MarVer1(50)	MarVer3(50)	MiFish(50)	Tele02(43)	Uni-minibar(37)	12SV5(47)	Vert-16S(50)
Chondrichthyes	Sphyrna lewini	1551	2075	6956	3053	2641	989	107	0	143	2194*
	Hemitrygon akajei	2884	2607	20522	4239	4953	708	281	1933	28	3667*
Actinopterygii	Acipenser ruthenus	1988	3362	5392	2791	4094	4702	2739	370	3165	3718*
	Acipenser transmontanus	1073	1055	4236	1450	2118	2261	1460	5	93	210*
	Polypterus senegalus	1108	1590	1230	1673	1813	3184	1828	992	347	2117*
	Lepisosteus oculatus	3844	3983	1873	4337	5708	8101	4185	439	1804	4157*
	Anguilla japonica	1283	2059	2304	1186	2622	3285	814	2484	1639	2134*
	Osteoglossum bicirrhosum	4531	3296	3151	3945	4145	9456	1827	0	12876	3814*
	Carassius auratus	1017	948	4563	1115	418	2821	1119	444	1242	1152*
	Danio rerio	930	1144	532	1080	484	3679	406	0	716	1465*
	Misgurnus anguillicaudatus	2812	2958	2739	2888	1188	6370	1481	1880	3358	4101*
	Pangasianodon hypophthalmus	4970	6111	1603	4804	2105	11071	2582	0	1711	8676*
	Hypostomus plecostomus	1640	2149	618	1933	787	4508	1639	277	4751	3241*
	Monopterus albus	338	4157	848	552	5843	3429	105	2	50	8008*
	Trichogaster fasciata	2661	4555	1037	3909	5739	7837	5159	0	2893	5423*
Dipnoi	Protopterus annectens	374	287	639	356	382	76	0	0	17	299		* sequence longer than 300 bp
	Lepidosiren paradoxa	112	265	84	116	543	42	0	89	0	316
Amphibia	Ichthyophis bannanicus	472	844	1192	814	1031	1290	54	0	17	1044
	Andrias davidianus	109	78	183	141	129	44	6	2	0	69
	Batrachuperus tibetanus	131	358	354	251	620	3	4	23	0	255*
	Pachytriton brevipes	275	124	422	517	423	1076	329	17	640	217
	Cynops orientalis	257	223	1088	411	453	875	284	0	590	198
	Bombina fortinuptialis	1534	517	1047	1714	1453	3503	1334	8552	5571	932*
	Duttaphrynus melanostictus	1407	1802	44	220	3183	8	2	368	2252	3184*
	Kaloula pulchra	398	2761	5682	1569	2226	22	0	2	386	3393
	Fejervarya limnocharis	640	2343	820	1976	2205	16	1	36	1736	3243
	Polypedates megacephalus	650	1431	2166	1658	1616	951	3	423	1006	2363
Reptilia	Carettochelys insculpta	12041	13025	8625	15531	15005	244	15465	2	8063	923
	Trachemys scripta	3829	6022	2140	6073	6317	10715	5336	5	2001	308
	Mauremys reevesii	534	1380	2369	1330	1594	18	1457	4	640	90
	Podocnemis unifilis	3081	5133	14280	4904	5287	258	5309	10	1804	294
	Alligator sinensis	8838	444	22957	13094	52	20473	2	2882	15314	300*
	Crocodylus siamensis	4996	3848	2078	306	256	110	0	3887	186	94*
	Plestiodon chinensis	6319	2103	14746	7133	11212	5439	3555	0	1629	21484
	Python bivittatus	1900	88	2233	2138	1683	607	0	0	35	79
	Oocatochus rufodorsatus	75	5411	3916	132	5554	28	0	2628	50	219
	Bungarus multicinctus	83	900	1633	119	4402	127	0	5	153	105
Aves	Struthio camelus	21042	14340	20459	26108	22545	735	26153	259770	10459	1294*
	Anas Platyrhynchos	6417	5053	5433	9018	6359	7353	9454	294	17222	67*
	Columba livia	6287	4212	1711	8654	6880	164	8835	42	11164	204
	Gallus gallus	15007	13790	8214	20973	17989	446	22901	22	38198	681*
	Alectoris chukar	15050	13081	13416	21852	18403	698	21190	431	29071	744*
	Melopsittacus undulatus	5793	4848	42980	8642	7965	1363	8670	2	12628	213
Mammalia	Murina shuipuensis	76034	80756	43318	89046	90525	136912	104459	12865	56749	112882
	Manis pentadactyla	10134	13904	23793	13716	15206	21013	12968	24	6609	19693
	Lutra lutra	2907	3798	3233	3975	4147	658	4715	0	2295	4792
	Sus scrofa	7338	10025	7797	10699	10830	16438	12832	26	19561	13023
	Ochotona curzoniae	744	874	883	1294	1188	178	1391	0	1758	861
	Mus musculus	12335	8051	12360	16478	10515	3793	18262	190	5700	11008
	Homo sapiens	1087	1203	488	1509	1727	95	1480	0	375	1768

## Sheet: mock-even_L
Higher classification	Species	mock-even_L
		V12S-U(50)	V16S-U(50)	VCOI-U(50)	MarVer1(50)	MarVer3(50)	MiFish(48)	Tele02(40)	Uni-minibar(30)	12SV5(46)	Vert-16S(50)
Chondrichthyes	Sphyrna lewini	1678	2266	5697	2905	2740	1243	92	0	78	2732*
	Hemitrygon akajei	2744	2603	17883	4141	4757	810	171	2501	28	3940*
Actinopterygii	Acipenser ruthenus	1862	2891	4976	2711	3512	4317	2455	321	3057	3531*
	Acipenser transmontanus	974	1467	4032	1396	1796	2258	1388	14	107	222*
	Polypterus senegalus	1255	1710	1124	1622	1779	3118	1574	974	295	2148*
	Lepisosteus oculatus	3784	4377	1875	4280	5057	7719	3769	672	2038	4104*
	Anguilla japonica	1282	1903	2103	1333	2540	3217	757	2667	1508	1980*
	Osteoglossum bicirrhosum	4223	3322	3324	3985	4140	9300	1556	0	12106	3644*
	Carassius auratus	1028	970	4524	1255	349	2606	989	231	1075	1122*
	Danio rerio	1019	1558	423	1113	420	3553	345	0	611	1540*
	Misgurnus anguillicaudatus	2754	2883	2280	2829	948	5895	1373	2326	3034	3548*
	Pangasianodon hypophthalmus	5020	5906	1480	5101	1660	11435	2573	0	1691	8718*
	Hypostomus plecostomus	1657	2128	493	1987	678	3818	1391	498	4552	3301*
	Monopterus albus	458	3963	524	575	5729	3549	75	0	48	7159*
	Trichogaster fasciata	2547	4404	1051	3556	4968	7591	4655	0	2669	5337*		* sequence longer than 300 bp
Dipnoi	Protopterus annectens	427	574	679	331	520	73	0	0	10	399
	Lepidosiren paradoxa	187	405	75	170	582	56	0	106	0	375
Amphibia	Ichthyophis bannanicus	502	1060	984	789	964	1278	58	0	0	941
	Andrias davidianus	121	103	115	214	120	56	0	0	0	118
	Batrachuperus tibetanus	196	557	255	334	705	0	3	22	0	327*
	Pachytriton brevipes	373	219	276	514	542	1087	321	46	428	352
	Cynops orientalis	236	356	866	451	471	818	242	0	476	243
	Bombina fortinuptialis	1561	572	1117	1775	1261	3493	1469	8744	5031	849*
	Duttaphrynus melanostictus	1352	2023	72	270	2906	0	0	871	2101	3239*
	Kaloula pulchra	387	2651	5296	1526	2177	26	0	0	456	3285
	Fejervarya limnocharis	688	2357	636	1848	2042	7	0	19	1673	3146
	Polypedates megacephalus	718	1619	1746	1564	1541	1225	1	359	886	2637
Reptilia	Carettochelys insculpta	10838	11587	7407	14663	14658	199	13898	3	7357	805
	Trachemys scripta	3999	5532	1104	5981	6295	10195	4799	2	2188	233
	Mauremys reevesii	615	1493	2145	1531	1687	20	1328	0	726	114
	Podocnemis unifilis	2764	5426	12706	4672	5602	272	4628	0	1633	283
	Alligator sinensis	7552	313	23386	11520	46	19523	3	3730	14908	321*
	Crocodylus siamensis	4870	3378	1803	393	253	151	0	4949	109	77*
	Plestiodon chinensis	5934	2116	14508	7404	10869	5448	3233	0	1589	17762
	Python bivittatus	1672	103	2043	2072	1616	709	0	0	33	88
	Oocatochus rufodorsatus	112	5377	3049	115	5347	30	0	2909	68	240
	Bungarus multicinctus	53	999	1519	124	4271	100	0	0	78	157
Aves	Struthio camelus	18424	12611	20168	25182	22363	667	24457	257828	10371	1088*
	Anas Platyrhynchos	6020	4888	5778	9346	6352	7298	8021	367	15973	81*
	Columba livia	5640	3964	1518	8231	6910	156	7946	31	10733	204
	Gallus gallus	13860	13084	8137	20205	17992	1136	20744	35	39210	571*
	Alectoris chukar	14208	11855	10779	21278	18254	742	20687	346	28709	635*
	Melopsittacus undulatus	5482	4571	47601	8947	8351	1537	8402	0	12559	238
Mammalia	Murina shuipuensis	65885	68053	44821	82037	83923	133213	109703	9281	62572	107780
	Manis pentadactyla	9129	12661	23661	13482	14259	19784	11834	0	6916	17839
	Lutra lutra	2724	3421	2936	3912	4075	704	4392	3	1992	4283
	Sus scrofa	7078	9213	7244	10584	10392	16091	11766	20	17313	13544
	Ochotona curzoniae	893	1092	788	1482	1219	165	1268	0	1508	1013
	Mus musculus	11619	8299	11845	16370	10995	4410	17089	162	5721	12361
	Homo sapiens	922	1231	461	1584	1527	121	1331	0	405	1749

## Sheet: mock-gardient_H
Higher classification	Species	mock-gradient_H
		V12S-U(50)	V16S-U(50)	VCOI-U(50)	MarVer1(50)	MarVer3(50)	MiFish(50)	Tele02(42)	Uni-minibar(37)	12SV5(47)	Vert-16S(49)
Chondrichthyes	Sphyrna lewini	5314	6608	18527	7729	6814	4503	265	52	175	7665*
	Hemitrygon akajei	329	304	1044	530	655	111	46	1152	0	340*
Actinopterygii	Acipenser ruthenus	227	304	1081	266	3	627	277	0	19	0
	Acipenser transmontanus	851	929	3554	929	1747	2598	1195	327	787	735*
	Polypterus senegalus	415	536	576	486	689	1544	699	1700	81	656*
	Lepisosteus oculatus	13892	15366	9677	13800	17096	35101	15019	10388	5504	16367*
	Anguilla japonica	183	268	384	172	390	536	109	1776	151	214*
	Osteoglossum bicirrhosum	1010	795	1382	915	1051	3454	448	0	2530	869*
	Carassius auratus	861	760	1994	889	342	3091	974	3673	584	940*
	Danio rerio	12189	15288	6026	10133	4683	44147	4763	4	7541	20502*
	Misgurnus anguillicaudatus	46	52	72	60	20	170	25	110	28	32*
	Pangasianodon hypophthalmus	77	143	24	93	40	330	68	0	40	139*
	Hypostomus plecostomus	45	97	39	87	36	196	55	81	73	107*
	Monopterus albus	358	4673	814	634	5626	5652	123	195	45	8527*
	Trichogaster fasciata	227	488	99	216	496	1142	546	0	141	416*		* sequence longer than 300 bp
Dipnoi	Protopterus annectens	8973	7461	4910	6173	7417	2651	21	0	49	8558
	Lepidosiren paradoxa	3386	6429	1526	4423	7479	1833	0	11948	0	8100
Amphibia	Ichthyophis bannanicus	4595	5541	2663	4385	5302	10639	306	0	48	7353
	Andrias davidianus	773	587	1174	925	820	471	27	10	13	607
	Batrachuperus tibetanus	2907	6271	4108	3708	7526	21	61	4470	5	6865*
	Pachytriton brevipes	7688	3932	9604	8900	7504	26608	6770	4529	10665	7381
	Cynops orientalis	905	917	2188	1144	1339	3707	892	0	1621	888
	Bombina fortinuptialis	3475	1381	887	3220	2389	10631	2651	96120	8456	1833*
	Duttaphrynus melanostictus	1814	2744	48	270	3654	14	0	3367	2325	3930*
	Kaloula pulchra	95	748	728	288	591	5	0	70	103	707
	Fejervarya limnocharis	5930	19289	7095	10663	12961	144	12	1966	13284	23206
	Polypedates megacephalus	7644	13926	20395	12360	12284	12660	50	16357	8115	22292
Reptilia	Carettochelys insculpta	240	328	278	422	440	9	672	0	135	19
	Trachemys scripta	6162	8722	1938	8174	8028	21409	8240	278	2104	522
	Mauremys reevesii	376	902	624	747	909	20	899	62	274	39
	Podocnemis unifilis	43637	57100	110481	45533	51011	6589	54498	1940	23423	5453
	Alligator sinensis	104	13	74	189	2	449	0	190	119	8*
	Crocodylus siamensis	2629	3427	1038	118	124	104	0	12722	51	27*
	Plestiodon chinensis	6822	1285	6667	7227	10963	8475	3917	0	1275	22024
	Python bivittatus	107	3	200	124	148	63	0	0	0	6
	Oocatochus rufodorsatus	363	18690	14880	588	20482	237	0	56141	279	1540
	Bungarus multicinctus	73	448	1005	66	2724	122	0	0	53	66
Aves	Struthio camelus	1210	838	988	1463	1332	28	1613	85313	401	52*
	Anas Platyrhynchos	1933	1353	289	2462	1605	2996	2484	1070	3566	27*
	Columba livia	21081	12641	4620	23559	16313	781	25403	134	26211	616
	Gallus gallus	5574	4270	2740	6658	5680	199	7303	82	10241	157*
	Alectoris chukar	35406	26161	26907	40616	32753	2427	45665	5610	51652	1641*
	Melopsittacus undulatus	67346	56555	60737	71373	67966	25288	82542	232	139017	4074
Mammalia	Murina shuipuensis	7999	6502	1892	10062	9336	20894	12332	5514	2396	11010
	Manis pentadactyla	29476	36038	26354	33698	40042	75364	33164	740	14707	55588
	Lutra lutra	410	491	281	492	725	149	677	0	217	704
	Sus scrofa	2141	2756	3014	3045	3512	7112	3846	76	3953	4270
	Ochotona curzoniae	5672	5156	5465	6417	5850	1725	6465	50	7026	6447
	Mus musculus	24582	15726	25178	30561	20463	11687	33410	2830	10010	27354
	Homo sapiens	17	26	7	46	51	3	30	0	11	50
		0	0	0	0	0	0	0	0	0	0

## Sheet: mock-gradient_L
Higher classification	Species	mock-gradient_L
		V12S-U(50)	V16S-U(50)	VCOI-U(49)	MarVer1(50)	MarVer3(50)	MiFish(49)	Tele02(43)	Uni-minibar(24)	12SV5(47)	Vert-16S(48)
Chondrichthyes	Sphyrna lewini	7140	11084	25934	10416	10074	6585	259	0	343	13601*
	Hemitrygon akajei	600	755	1055	742	1035	153	11	4331	9	760*
Actinopterygii	Acipenser ruthenus	330	660	893	501	507	845	484	190	0	0
	Acipenser transmontanus	1213	1443	4736	1272	1639	3266	1115	0	1044	1316*
	Polypterus senegalus	691	1116	554	985	1000	1709	925	1847	90	1067*
	Lepisosteus oculatus	18117	20677	13405	17945	21704	53570	18542	7175	8161	24148*
	Anguilla japonica	307	500	622	221	533	721	97	993	192	309*
	Osteoglossum bicirrhosum	1405	1310	1683	1458	1592	3973	667	0	3188	1415*
	Carassius auratus	1498	1372	2418	1419	372	3797	1197	11979	726	1733*
	Danio rerio	18113	21559	9317	16553	5479	63734	5763	0	9924	27321*
	Misgurnus anguillicaudatus	54	129	84	106	18	148	3	218	88	82*
	Pangasianodon hypophthalmus	139	187	79	150	57	436	40	0	32	197*
	Hypostomus plecostomus	47	170	11	136	37	449	93	0	143	161*
	Monopterus albus	558	6337	1151	730	8018	8047	127	0	64	10471*
	Trichogaster fasciata	315	705	246	540	615	1240	811	0	285	872*		* sequences longer than 300 bp
Dipnoi	Protopterus annectens	11986	12510	7214	8316	11967	4024	13	0	64	15835
	Lepidosiren paradoxa	5399	8336	2103	4507	10805	3110	0	10796	13	11355
Amphibia	Ichthyophis bannanicus	5711	7418	4482	5696	6726	13490	425	0	116	10938
	Andrias davidianus	1045	1143	1751	1444	1579	701	7	0	30	1796
	Batrachuperus tibetanus	4909	10359	5314	6544	12268	54	97	7537	16	12760*
	Pachytriton brevipes	10840	6606	11306	12866	11073	34772	9025	4383	14600	13183
	Cynops orientalis	1511	1946	3100	1802	1965	4960	1186	0	2341	1420
	Bombina fortinuptialis	4506	1828	1224	4674	2989	14267	3020	147305	9750	2879*
	Duttaphrynus melanostictus	2439	3814	37	377	4692	25	2	3193	3063	6295*
	Kaloula pulchra	140	961	1262	390	762	4	0	0	125	1058
	Fejervarya limnocharis	7634	22762	10629	15194	16212	129	18	5239	17243	29360
	Polypedates megacephalus	10575	18782	28957	15743	13561	17606	70	20179	12384	26801
Reptilia	Carettochelys insculpta	353	525	707	742	716	4	589	0	206	38
	Trachemys scripta	8071	11633	2801	11119	11471	29774	11111	0	2875	773
	Mauremys reevesii	653	1437	1165	1476	1392	25	988	0	389	108
	Podocnemis unifilis	58264	76528	159310	60881	71866	9207	76682	1464	32088	8674
	Alligator sinensis	127	10	277	194	1	536	0	0	120	0
	Crocodylus siamensis	4091	3172	1238	190	206	124	0	19098	113	85*
	Plestiodon chinensis	10032	1498	9691	11242	14591	12668	4950	0	1907	27625
	Python bivittatus	147	5	491	279	121	98	0	0	0	53
	Oocatochus rufodorsatus	559	23764	17265	776	29170	402	0	66790	229	2512
	Bungarus multicinctus	111	622	1452	114	3898	162	0	0	53	151
Aves	Struthio camelus	2002	1262	1415	1966	2040	60	2129	123387	654	59*
	Anas Platyrhynchos	2878	2093	611	3404	2651	4123	3403	3855	5037	67*
	Columba livia	27343	18419	5831	31608	22468	1094	33686	0	36014	1144
	Gallus gallus	8290	6330	3006	9047	8270	232	9522	0	14463	266*
	Alectoris chukar	52310	37351	36592	56973	47504	3274	65514	7298	68127	2276*
	Melopsittacus undulatus	99293	80281	82688	102619	103005	37854	127589	277	198823	5555
Mammalia	Murina shuipuensis	10319	10152	3239	12879	12178	26441	16436	11234	4160	15978
	Manis pentadactyla	38233	48134	36994	45800	49977	105575	46947	114	20142	75753
	Lutra lutra	534	693	366	870	940	160	572	0	320	808
	Sus scrofa	3339	4335	4261	4696	4196	10957	4968	0	4462	6601
	Ochotona curzoniae	7063	6401	7536	8558	7400	2028	7749	0	10226	9530
	Mus musculus	35586	26134	35200	45080	31649	17125	45093	4318	14737	45454
	Homo sapiens	23	46	0	53	65	0	148	0	0	134
