# Supplementary material for: VertU: universal multilocus primer sets for eDNA metabarcoding of vertebrate diversity, evaluated by both artificial and natural cases
Source: Frontiers journal article supplement (doi:10.3389/fevo.2023.1164206), 2023-06-19
Supplement: Table_5.XLSX [file Table_5.XLSX]

## Sheet: species
Classification	taxa	taxonomy	No. of Sequence			Native species
			V12S-U	V16S-U	VCOI-U
Fish	Schizothorax kozlovi	Vertebrata;Gnathostomata;Teleostomi;Euteleostomi;Actinopterygii;Actinopteri;Neopterygii;Teleostei;Osteoglossocephalai;Clupeocephala;Otomorpha;Ostariophysi;Otophysi;Cypriniphysae;Cypriniformes;Cyprinoidei;Cyprinidae;Schizothoracinae;Schizothorax;Schizothorax kozlovi	328689	515625	16375	yes
	Pareuchiloglanis anteanalis	Vertebrata;Gnathostomata;Teleostomi;Euteleostomi;Actinopterygii;Actinopteri;Neopterygii;Teleostei;Osteoglossocephalai;Clupeocephala;Otomorpha;Ostariophysi;Otophysi;Characiphysae;Siluriformes;Siluroidei;Sisoridae;Glyptosterninae;Pareuchiloglanis;Pareuchiloglanis anteanalis	25662	23524	5570	yes
	Phoxinus oxycephalus	Vertebrata;Gnathostomata;Teleostomi;Euteleostomi;Actinopterygii;Actinopteri;Neopterygii;Teleostei;Osteoglossocephalai;Clupeocephala;Otomorpha;Ostariophysi;Otophysi;Cypriniphysae;Cypriniformes;Cyprinoidei;Leuciscidae;Phoxininae;Phoxinus;Phoxinus oxycephalus	15167	28742	2386	yes
	Onychostoma macrolepis	Vertebrata;Gnathostomata;Teleostomi;Euteleostomi;Actinopterygii;Actinopteri;Neopterygii;Teleostei;Osteoglossocephalai;Clupeocephala;Otomorpha;Ostariophysi;Otophysi;Cypriniphysae;Cypriniformes;Cyprinoidei;Cyprinidae;Acrossocheilinae;Onychostoma;Onychostoma macrolepis	3769	8149	1249	yes
	Belligobio pengxianensis	Vertebrata;Gnathostomata;Teleostomi;Euteleostomi;Actinopterygii;Actinopteri;Neopterygii;Teleostei;Osteoglossocephalai;Clupeocephala;Otomorpha;Ostariophysi;Otophysi;Cypriniphysae;Cypriniformes;Cyprinoidei;Gobionidae;Hemibarbus-Squalidus clade;Belligobio;Belligobio pengxianensis	1937	0	171	yes
	Sinogastromyzon hsiashiensis	Vertebrata;Gnathostomata;Teleostomi;Euteleostomi;Actinopterygii;Actinopteri;Neopterygii;Teleostei;Osteoglossocephalai;Clupeocephala;Otomorpha;Ostariophysi;Otophysi;Cypriniphysae;Cypriniformes;Cobitoidei;Balitoridae;Sinogastromyzon;Sinogastromyzon hsiashiensis	1052	0	0	yes
	Jinshaia sinensis	Vertebrata;Gnathostomata;Teleostomi;Euteleostomi;Actinopterygii;Actinopteri;Neopterygii;Teleostei;Osteoglossocephalai;Clupeocephala;Otomorpha;Ostariophysi;Otophysi;Cypriniphysae;Cypriniformes;Cobitoidei;Balitoridae;Jinshaia;Jinshaia sinensis	0	1945	0	yes
	Schizothorax dolichonema	Vertebrata;Gnathostomata;Teleostomi;Euteleostomi;Actinopterygii;Actinopteri;Neopterygii;Teleostei;Osteoglossocephalai;Clupeocephala;Otomorpha;Ostariophysi;Otophysi;Cypriniphysae;Cypriniformes;Cyprinoidei;Cyprinidae;Schizothoracinae;Schizopyge;Schizopyge dolichonema	0	15	0	yes
	Rhynchocypris lagowskii	Vertebrata;Gnathostomata;Teleostomi;Euteleostomi;Actinopterygii;Actinopteri;Neopterygii;Teleostei;Osteoglossocephalai;Clupeocephala;Otomorpha;Ostariophysi;Otophysi;Cypriniphysae;Cypriniformes;Cyprinoidei;Leuciscidae;Pseudaspininae;Rhynchocypris;Rhynchocypris lagowskii	0	0	6376	yes
	Triplophysa bleekeri	Vertebrata;Gnathostomata;Teleostomi;Euteleostomi;Actinopterygii;Actinopteri;Neopterygii;Teleostei;Osteoglossocephalai;Clupeocephala;Otomorpha;Ostariophysi;Otophysi;Cypriniphysae;Cypriniformes;Cobitoidei;Nemacheilidae;Triplophysa	0	0	318	yes
Amphibia	Bufo gargarizans	Vertebrata;Gnathostomata;Teleostomi;Euteleostomi;Sarcopterygii;Dipnotetrapodomorpha;Tetrapoda;Amphibia;Batrachia;Anura;Neobatrachia;Hyloidea;Bufonidae;Bufo;Bufo gargarizans	9732	18657	1610	yes
	Amolops mantzorum	Vertebrata;Gnathostomata;Teleostomi;Euteleostomi;Sarcopterygii;Dipnotetrapodomorpha;Tetrapoda;Amphibia;Batrachia;Anura;Neobatrachia;Ranoidea;Ranidae;Amolops;Amolops mantzorum	618	3458	1224	yes
	Nanorana quadranus	Vertebrata;Gnathostomata;Teleostomi;Euteleostomi;Sarcopterygii;Dipnotetrapodomorpha;Tetrapoda;Amphibia;Batrachia;Anura;Neobatrachia;Ranoidea;Dicroglossidae;Dicroglossinae;Nanorana;Feirana;Nanorana quadranus	52	456	0	yes
	Amolops chunganensis	Vertebrata;Gnathostomata;Teleostomi;Euteleostomi;Sarcopterygii;Dipnotetrapodomorpha;Tetrapoda;Amphibia;Batrachia;Anura;Neobatrachia;Ranoidea;Ranidae;Amolops;Amolops chunganensis	51	157	239	yes
	Oreolalax major	Vertebrata;Gnathostomata;Teleostomi;Euteleostomi;Sarcopterygii;Dipnotetrapodomorpha;Tetrapoda;Amphibia;Batrachia;Anura;Pelobatoidea;Megophryidae;Oreolalax;Oreolalax major	21	59	0	yes
	Megophrys wushanensis	Vertebrata;Gnathostomata;Teleostomi;Euteleostomi;Sarcopterygii;Dipnotetrapodomorpha;Tetrapoda;Amphibia;Batrachia;Anura;Pelobatoidea;Megophryidae;Megophrys;Megophrys wushanensis	0	58	0	yes
Bird	Luscinia calliope	Vertebrata;Gnathostomata;Teleostomi;Euteleostomi;Sarcopterygii;Dipnotetrapodomorpha;Tetrapoda;Amniota;Sauropsida;Sauria;Archelosauria;Archosauria;Dinosauria;Saurischia;Theropoda;Coelurosauria;Aves;Neognathae;Passeriformes;Muscicapidae;Calliope;Calliope calliope	2032	2019	239	yes
	Scolopax rusticola	Vertebrata;Gnathostomata;Teleostomi;Euteleostomi;Sarcopterygii;Dipnotetrapodomorpha;Tetrapoda;Amniota;Sauropsida;Sauria;Archelosauria;Archosauria;Dinosauria;Saurischia;Theropoda;Coelurosauria;Aves;Neognathae;Charadriiformes;Scolopacidae;Scolopax;Scolopax rusticola	71	67	29	yes
	Turdus migratorius	Vertebrata;Gnathostomata;Teleostomi;Euteleostomi;Sarcopterygii;Dipnotetrapodomorpha;Tetrapoda;Amniota;Sauropsida;Sauria;Archelosauria;Archosauria;Dinosauria;Saurischia;Theropoda;Coelurosauria;Aves;Neognathae;Passeriformes;Turdidae;Turdus;Turdus migratorius	60	0	0	no
	Zoothera aurea	Vertebrata;Gnathostomata;Teleostomi;Euteleostomi;Sarcopterygii;Dipnotetrapodomorpha;Tetrapoda;Amniota;Sauropsida;Sauria;Archelosauria;Archosauria;Dinosauria;Saurischia;Theropoda;Coelurosauria;Aves;Neognathae;Passeriformes;Turdidae;Zoothera;Zoothera aurea	50	589	117	yes
	Megalaima virens	Vertebrata;Gnathostomata;Teleostomi;Euteleostomi;Sarcopterygii;Dipnotetrapodomorpha;Tetrapoda;Amniota;Sauropsida;Sauria;Archelosauria;Archosauria;Dinosauria;Saurischia;Theropoda;Coelurosauria;Aves;Neognathae;Piciformes;Megalaimidae;Megalaima;Megalaima virens	28	0	0	yes
	Anas crecca	Vertebrata;Gnathostomata;Teleostomi;Euteleostomi;Sarcopterygii;Dipnotetrapodomorpha;Tetrapoda;Amniota;Sauropsida;Sauria;Archelosauria;Archosauria;Dinosauria;Saurischia;Theropoda;Coelurosauria;Aves;Neognathae;Galloanserae;Anseriformes;Anatidae;Anatinae;Anas;Anas crecca	22	0	0	yes
	Phoenicurus phoenicurus	Vertebrata;Gnathostomata;Teleostomi;Euteleostomi;Sarcopterygii;Dipnotetrapodomorpha;Tetrapoda;Amniota;Sauropsida;Sauria;Archelosauria;Archosauria;Dinosauria;Saurischia;Theropoda;Coelurosauria;Aves;Neognathae;Passeriformes;Muscicapidae;Phoenicurus;Phoenicurus phoenicurus	19	0	0	no
	Delichon urbicum	Vertebrata;Gnathostomata;Teleostomi;Euteleostomi;Sarcopterygii;Dipnotetrapodomorpha;Tetrapoda;Amniota;Sauropsida;Sauria;Archelosauria;Archosauria;Dinosauria;Saurischia;Theropoda;Coelurosauria;Aves;Neognathae;Passeriformes;Sylvioidea;Hirundinidae;Delichon;Delichon urbicum	19	0	0	yes
	Urocissa erythrorhyncha	Vertebrata;Gnathostomata;Teleostomi;Euteleostomi;Sarcopterygii;Dipnotetrapodomorpha;Tetrapoda;Amniota;Sauropsida;Sauria;Archelosauria;Archosauria;Dinosauria;Saurischia;Theropoda;Coelurosauria;Aves;Neognathae;Passeriformes;Corvoidea;Corvidae;Urocissa;Urocissa erythroryncha	0	139	0	yes
	Columba hodgsonii	Vertebrata;Gnathostomata;Teleostomi;Euteleostomi;Sarcopterygii;Dipnotetrapodomorpha;Tetrapoda;Amniota;Sauropsida;Sauria;Archelosauria;Archosauria;Dinosauria;Saurischia;Theropoda;Coelurosauria;Aves;Neognathae;Columbiformes;Columbidae;Columba;Columba hodgsonii	0	42	0	yes
	Picus canus	Vertebrata;Gnathostomata;Teleostomi;Euteleostomi;Sarcopterygii;Dipnotetrapodomorpha;Tetrapoda;Amniota;Sauropsida;Sauria;Archelosauria;Archosauria;Dinosauria;Saurischia;Theropoda;Coelurosauria;Aves;Neognathae;Piciformes;Picidae;Picus;Picus canus	0	28	0	yes
	Parus venustulus	Vertebrata;Gnathostomata;Teleostomi;Euteleostomi;Sarcopterygii;Dipnotetrapodomorpha;Tetrapoda;Amniota;Sauropsida;Sauria;Archelosauria;Archosauria;Dinosauria;Saurischia;Theropoda;Coelurosauria;Aves;Neognathae;Passeriformes;Paridae;Pardaliparus;Pardaliparus venustulus	0	11	0	yes
	Cinclus pallasii	Vertebrata;Gnathostomata;Teleostomi;Euteleostomi;Sarcopterygii;Dipnotetrapodomorpha;Tetrapoda;Amniota;Sauropsida;Sauria;Archelosauria;Archosauria;Dinosauria;Saurischia;Theropoda;Coelurosauria;Aves;Neognathae;Passeriformes;Cinclidae;Cinclus;Cinclus pallasii	0	0	64	yes
Mammalia	Sus scrofa	Vertebrata;Gnathostomata;Teleostomi;Euteleostomi;Sarcopterygii;Dipnotetrapodomorpha;Tetrapoda;Amniota;Mammalia;Theria;Eutheria;Boreoeutheria;Laurasiatheria;Artiodactyla;Suina;Suidae;Sus;Sus scrofa	975	1097	185	yes
	Paguma larvata	Vertebrata;Gnathostomata;Teleostomi;Euteleostomi;Sarcopterygii;Dipnotetrapodomorpha;Tetrapoda;Amniota;Mammalia;Theria;Eutheria;Boreoeutheria;Laurasiatheria;Carnivora;Feliformia;Viverridae;Paradoxurinae;Paguma;Paguma larvata	521	1051	0	yes
	Muntiacus reevesi	Vertebrata;Gnathostomata;Teleostomi;Euteleostomi;Sarcopterygii;Dipnotetrapodomorpha;Tetrapoda;Amniota;Mammalia;Theria;Eutheria;Boreoeutheria;Laurasiatheria;Artiodactyla;Ruminantia;Pecora;Cervidae;Muntiacinae;Muntiacus;Muntiacus reevesi	488	453	0	yes
	Chodsigoa hypsibia	Vertebrata;Gnathostomata;Teleostomi;Euteleostomi;Sarcopterygii;Dipnotetrapodomorpha;Tetrapoda;Amniota;Mammalia;Theria;Eutheria;Boreoeutheria;Laurasiatheria;Eulipotyphla;Soricidae;Soricinae;Chodsigoa;Chodsigoa hypsibia	382	128	42	yes
	Budorcas taxicolor	Vertebrata;Gnathostomata;Teleostomi;Euteleostomi;Sarcopterygii;Dipnotetrapodomorpha;Tetrapoda;Amniota;Mammalia;Theria;Eutheria;Boreoeutheria;Laurasiatheria;Artiodactyla;Ruminantia;Pecora;Bovidae;Caprinae;Budorcas;Budorcas taxicolor	310	752	40	yes
	Ursus thibetanus	Vertebrata;Gnathostomata;Teleostomi;Euteleostomi;Sarcopterygii;Dipnotetrapodomorpha;Tetrapoda;Amniota;Mammalia;Theria;Eutheria;Boreoeutheria;Laurasiatheria;Carnivora;Caniformia;Ursidae;Ursus;Ursus thibetanus	181	83	0	yes
	Arctonyx collaris	Vertebrata;Gnathostomata;Teleostomi;Euteleostomi;Sarcopterygii;Dipnotetrapodomorpha;Tetrapoda;Amniota;Mammalia;Theria;Eutheria;Boreoeutheria;Laurasiatheria;Carnivora;Caniformia;Mustelidae;Melinae;Arctonyx;Arctonyx collaris	105	32	0	yes
	Nectogale elegans	Vertebrata;Gnathostomata;Teleostomi;Euteleostomi;Sarcopterygii;Dipnotetrapodomorpha;Tetrapoda;Amniota;Mammalia;Theria;Eutheria;Boreoeutheria;Laurasiatheria;Eulipotyphla;Soricidae;Soricinae;Nectogale;Nectogale elegans	80	0	27	yes
	Sciurotamias davidianus	Vertebrata;Gnathostomata;Teleostomi;Euteleostomi;Sarcopterygii;Dipnotetrapodomorpha;Tetrapoda;Amniota;Mammalia;Theria;Eutheria;Boreoeutheria;Euarchontoglires;Glires;Rodentia;Sciuromorpha;Sciuridae;Xerinae;Marmotini;Sciurotamias;Sciurotamias davidianus	54	0	220	yes
	Uropsilus soricipes	Vertebrata;Gnathostomata;Teleostomi;Euteleostomi;Sarcopterygii;Dipnotetrapodomorpha;Tetrapoda;Amniota;Mammalia;Theria;Eutheria;Boreoeutheria;Laurasiatheria;Eulipotyphla;Talpidae;Uropsilus;Uropsilus soricipes	54	0	0	yes
	Hystrix brachyura	Vertebrata;Gnathostomata;Teleostomi;Euteleostomi;Sarcopterygii;Dipnotetrapodomorpha;Tetrapoda;Amniota;Mammalia;Theria;Eutheria;Boreoeutheria;Euarchontoglires;Glires;Rodentia;Hystricomorpha;Hystricidae;Hystrix;Hystrix brachyura	39	122	0	yes
	Prionailurus bengalensis	Vertebrata;Gnathostomata;Teleostomi;Euteleostomi;Sarcopterygii;Dipnotetrapodomorpha;Tetrapoda;Amniota;Mammalia;Theria;Eutheria;Boreoeutheria;Laurasiatheria;Carnivora;Feliformia;Felidae;Felinae;Prionailurus;Prionailurus bengalensis	37	0	0	yes
	Lutra lutra	Vertebrata;Gnathostomata;Teleostomi;Euteleostomi;Sarcopterygii;Dipnotetrapodomorpha;Tetrapoda;Amniota;Mammalia;Theria;Eutheria;Boreoeutheria;Laurasiatheria;Carnivora;Caniformia;Mustelidae;Lutrinae;Lutra;Lutra lutra	35	0	0	yes
	Macaca thibetana	Vertebrata;Gnathostomata;Teleostomi;Euteleostomi;Sarcopterygii;Dipnotetrapodomorpha;Tetrapoda;Amniota;Mammalia;Theria;Eutheria;Boreoeutheria;Euarchontoglires;Primates;Haplorrhini;Simiiformes;Catarrhini;Cercopithecoidea;Cercopithecidae;Cercopithecinae;Macaca;Macaca thibetana	29	169	0	yes
	Rhinopithecus roxellana	Vertebrata;Gnathostomata;Teleostomi;Euteleostomi;Sarcopterygii;Dipnotetrapodomorpha;Tetrapoda;Amniota;Mammalia;Theria;Eutheria;Boreoeutheria;Euarchontoglires;Primates;Haplorrhini;Simiiformes;Catarrhini;Cercopithecoidea;Cercopithecidae;Colobinae;Rhinopithecus;Rhinopithecus roxellana	24	265	0	yes
	Eothenomys melanogaster	Vertebrata;Gnathostomata;Teleostomi;Euteleostomi;Sarcopterygii;Dipnotetrapodomorpha;Tetrapoda;Amniota;Mammalia;Theria;Eutheria;Boreoeutheria;Euarchontoglires;Glires;Rodentia;Myomorpha;Muroidea;Cricetidae;Arvicolinae;Eothenomys;Eothenomys melanogaster	21	98	0	yes
	Niviventer excelsior	Vertebrata;Gnathostomata;Teleostomi;Euteleostomi;Sarcopterygii;Dipnotetrapodomorpha;Tetrapoda;Amniota;Mammalia;Theria;Eutheria;Boreoeutheria;Euarchontoglires;Glires;Rodentia;Myomorpha;Muroidea;Muridae;Murinae;Niviventer;Niviventer excelsior	0	382	0	yes
	Anourosorex squamipes	Vertebrata;Gnathostomata;Teleostomi;Euteleostomi;Sarcopterygii;Dipnotetrapodomorpha;Tetrapoda;Amniota;Mammalia;Theria;Eutheria;Boreoeutheria;Laurasiatheria;Eulipotyphla;Soricidae;Soricinae;Anourosorex;Anourosorex squamipes	0	360	0	yes
	Neotetracus sinensis	Vertebrata;Gnathostomata;Teleostomi;Euteleostomi;Sarcopterygii;Dipnotetrapodomorpha;Tetrapoda;Amniota;Mammalia;Theria;Eutheria;Boreoeutheria;Laurasiatheria;Eulipotyphla;Erinaceidae;Galericinae;Neotetracus;Neotetracus sinensis	0	287	0	yes
	Rattus norvegicus	Vertebrata;Gnathostomata;Teleostomi;Euteleostomi;Sarcopterygii;Dipnotetrapodomorpha;Tetrapoda;Amniota;Mammalia;Theria;Eutheria;Boreoeutheria;Euarchontoglires;Glires;Rodentia;Myomorpha;Muroidea;Muridae;Murinae;Rattus;Rattus norvegicus	0	168	0	yes
	Naemorhedus goral	Vertebrata;Gnathostomata;Teleostomi;Euteleostomi;Sarcopterygii;Dipnotetrapodomorpha;Tetrapoda;Amniota;Mammalia;Theria;Eutheria;Boreoeutheria;Laurasiatheria;Artiodactyla;Ruminantia;Pecora;Bovidae;Caprinae;Naemorhedus;Naemorhedus goral	0	56	0	yes
	Bubalus bubalis	Vertebrata;Gnathostomata;Teleostomi;Euteleostomi;Sarcopterygii;Dipnotetrapodomorpha;Tetrapoda;Amniota;Mammalia;Theria;Eutheria;Boreoeutheria;Laurasiatheria;Artiodactyla;Ruminantia;Pecora;Bovidae;Bovinae;Bubalus;Bubalus bubalis	0	50	0	yes
	Niviventer confucianus	Vertebrata;Gnathostomata;Teleostomi;Euteleostomi;Sarcopterygii;Dipnotetrapodomorpha;Tetrapoda;Amniota;Mammalia;Theria;Eutheria;Boreoeutheria;Euarchontoglires;Glires;Rodentia;Myomorpha;Muroidea;Muridae;Murinae;Niviventer;Niviventer confucianus	0	0	106	yes
Reptile	Bungarus fasciatus	Vertebrata;Gnathostomata;Teleostomi;Euteleostomi;Sarcopterygii;Dipnotetrapodomorpha;Tetrapoda;Amniota;Sauropsida;Sauria;Lepidosauria;Squamata;Bifurcata;Unidentata;Episquamata;Toxicofera;Serpentes;Colubroidea;Elapidae;Bungarinae;Bungarus;Bungarus fasciatus	0	405	0	yes

## Sheet: genus
Classification	taxa	taxonomy	No. of Sequence
			V12S-U	V16S-U	VCOI-U
Fish	Aphyocypris sp.1	Vertebrata;Gnathostomata;Teleostomi;Euteleostomi;Actinopterygii;Actinopteri;Neopterygii;Teleostei;Osteoglossocephalai;Clupeocephala;Otomorpha;Ostariophysi;Otophysi;Cypriniphysae;Cypriniformes;Cyprinoidei;Xenocyprididae;Xenocypridinae;Aphyocypris;Aphyocypris	0	0	340
	Belligobio sp.1	Vertebrata;Gnathostomata;Teleostomi;Euteleostomi;Actinopterygii;Actinopteri;Neopterygii;Teleostei;Osteoglossocephalai;Clupeocephala;Otomorpha;Ostariophysi;Otophysi;Cypriniphysae;Cypriniformes;Cyprinoidei;Gobionidae;Hemibarbus-Squalidus	0	6129	0
	Belligobio sp.2	Vertebrata;Gnathostomata;Teleostomi;Euteleostomi;Actinopterygii;Actinopteri;Neopterygii;Teleostei;Osteoglossocephalai;Clupeocephala;Otomorpha;Ostariophysi;Otophysi;Cypriniphysae;Cypriniformes;Cyprinoidei;Gobionidae;Hemibarbus-Squalidus	0	10	0
	Homatula sp.1	Vertebrata;Gnathostomata;Teleostomi;Euteleostomi;Actinopterygii;Actinopteri;Neopterygii;Teleostei;Osteoglossocephalai;Clupeocephala;Otomorpha;Ostariophysi;Otophysi;Cypriniphysae;Cypriniformes;Cobitoidei;Nemacheilidae;Homatula;Homatula	14174	0	0
	Homatula sp.2	Vertebrata;Gnathostomata;Teleostomi;Euteleostomi;Actinopterygii;Actinopteri;Neopterygii;Teleostei;Osteoglossocephalai;Clupeocephala;Otomorpha;Ostariophysi;Otophysi;Cypriniphysae;Cypriniformes;Cobitoidei;Nemacheilidae;Homatula;Homatula	27	0	0
	Homatula sp.3	Vertebrata;Gnathostomata;Teleostomi;Euteleostomi;Actinopterygii;Actinopteri;Neopterygii;Teleostei;Osteoglossocephalai;Clupeocephala;Otomorpha;Ostariophysi;Otophysi;Cypriniphysae;Cypriniformes;Cobitoidei;Nemacheilidae;Homatula;Homatula	0	34246	0
	Homatula sp.4	Vertebrata;Gnathostomata;Teleostomi;Euteleostomi;Actinopterygii;Actinopteri;Neopterygii;Teleostei;Osteoglossocephalai;Clupeocephala;Otomorpha;Ostariophysi;Otophysi;Cypriniphysae;Cypriniformes;Cobitoidei;Nemacheilidae;Homatula;Homatula	0	95	0
	Jinshaia sp.1	Vertebrata;Gnathostomata;Teleostomi;Euteleostomi;Actinopterygii;Actinopteri;Neopterygii;Teleostei;Osteoglossocephalai;Clupeocephala;Otomorpha;Ostariophysi;Otophysi;Cypriniphysae;Cypriniformes;Cobitoidei;Balitoridae;Jinshaia;Jinshaia	0	33	0
	Megalobrama sp.1	Vertebrata;Gnathostomata;Teleostomi;Euteleostomi;Actinopterygii;Actinopteri;Neopterygii;Teleostei;Osteoglossocephalai;Clupeocephala;Otomorpha;Ostariophysi;Otophysi;Cypriniphysae;Cypriniformes;Cyprinoidei;Xenocyprididae;Xenocypridinae;Megalobrama	0	13	0
	Onychostoma sp.1	Vertebrata;Gnathostomata;Teleostomi;Euteleostomi;Actinopterygii;Actinopteri;Neopterygii;Teleostei;Osteoglossocephalai;Clupeocephala;Otomorpha;Ostariophysi;Otophysi;Cypriniphysae;Cypriniformes;Cyprinoidei;Cyprinidae;Acrossocheilinae;Onychostoma;Onychostoma	0	819	0
	Onychostoma sp.2	Vertebrata;Gnathostomata;Teleostomi;Euteleostomi;Actinopterygii;Actinopteri;Neopterygii;Teleostei;Osteoglossocephalai;Clupeocephala;Otomorpha;Ostariophysi;Otophysi;Cypriniphysae;Cypriniformes;Cyprinoidei;Cyprinidae;Acrossocheilinae;Onychostoma;Onychostoma	0	129	0
	Phoxinus sp.1	Vertebrata;Gnathostomata;Teleostomi;Euteleostomi;Actinopterygii;Actinopteri;Neopterygii;Teleostei;Osteoglossocephalai;Clupeocephala;Otomorpha;Ostariophysi;Otophysi;Cypriniphysae;Cypriniformes;Cyprinoidei;Leuciscidae;Phoxininae;Phoxinus;Phoxinus	0	101	0
	Phoxinus sp.2	Vertebrata;Gnathostomata;Teleostomi;Euteleostomi;Actinopterygii;Actinopteri;Neopterygii;Teleostei;Osteoglossocephalai;Clupeocephala;Otomorpha;Ostariophysi;Otophysi;Cypriniphysae;Cypriniformes;Cyprinoidei;Leuciscidae;Phoxininae;Phoxinus;Phoxinus	0	10	0
	Pseudaspius sp.1	Vertebrata;Gnathostomata;Teleostomi;Euteleostomi;Actinopterygii;Actinopteri;Neopterygii;Teleostei;Osteoglossocephalai;Clupeocephala;Otomorpha;Ostariophysi;Otophysi;Cypriniphysae;Cypriniformes;Cyprinoidei;Leuciscidae;Pseudaspininae;Pseudaspius;Pseudaspius	9237	0	0
	Rhinogobius sp.1	Vertebrata;Gnathostomata;Teleostomi;Euteleostomi;Actinopterygii;Actinopteri;Neopterygii;Teleostei;Osteoglossocephalai;Clupeocephala;Euteleosteomorpha;Neoteleostei;Eurypterygia;Ctenosquamata;Acanthomorphata;Euacanthomorphacea;Percomorphaceae;Gobiaria;Gobiiformes;Gobioidei;Gobiidae;Gobionellinae;Rhinogobius;Rhinogobius	0	82	0
	Schistura sp.1	Vertebrata;Gnathostomata;Teleostomi;Euteleostomi;Actinopterygii;Actinopteri;Neopterygii;Teleostei;Osteoglossocephalai;Clupeocephala;Otomorpha;Ostariophysi;Otophysi;Cypriniphysae;Cypriniformes;Cobitoidei;Nemacheilidae;Schistura;Schistura	0	13	0
	Schizothorax sp.1	Vertebrata;Gnathostomata;Teleostomi;Euteleostomi;Actinopterygii;Actinopteri;Neopterygii;Teleostei;Osteoglossocephalai;Clupeocephala;Otomorpha;Ostariophysi;Otophysi;Cypriniphysae;Cypriniformes;Cyprinoidei;Cyprinidae;Schizothoracinae;Schizothorax;Schizothorax	532	0	0
	Schizothorax sp.2	Vertebrata;Gnathostomata;Teleostomi;Euteleostomi;Actinopterygii;Actinopteri;Neopterygii;Teleostei;Osteoglossocephalai;Clupeocephala;Otomorpha;Ostariophysi;Otophysi;Cypriniphysae;Cypriniformes;Cyprinoidei;Cyprinidae;Schizothoracinae;Schizothorax;Schizothorax	53	0	0
	Schizothorax sp.3	Vertebrata;Gnathostomata;Teleostomi;Euteleostomi;Actinopterygii;Actinopteri;Neopterygii;Teleostei;Osteoglossocephalai;Clupeocephala;Otomorpha;Ostariophysi;Otophysi;Cypriniphysae;Cypriniformes;Cyprinoidei;Cyprinidae;Schizothoracinae;Schizothorax;Schizothorax	10	0	0
	Schizothorax sp.4	Vertebrata;Gnathostomata;Teleostomi;Euteleostomi;Actinopterygii;Actinopteri;Neopterygii;Teleostei;Osteoglossocephalai;Clupeocephala;Otomorpha;Ostariophysi;Otophysi;Cypriniphysae;Cypriniformes;Cyprinoidei;Cyprinidae;Schizothoracinae;Schizothorax;Schizothorax	0	645	0
	Schizothorax sp.5	Vertebrata;Gnathostomata;Teleostomi;Euteleostomi;Actinopterygii;Actinopteri;Neopterygii;Teleostei;Osteoglossocephalai;Clupeocephala;Otomorpha;Ostariophysi;Otophysi;Cypriniphysae;Cypriniformes;Cyprinoidei;Cyprinidae;Schizothoracinae;Schizothorax;Schizothorax	0	106	0
	Schizothorax sp.6	Vertebrata;Gnathostomata;Teleostomi;Euteleostomi;Actinopterygii;Actinopteri;Neopterygii;Teleostei;Osteoglossocephalai;Clupeocephala;Otomorpha;Ostariophysi;Otophysi;Cypriniphysae;Cypriniformes;Cyprinoidei;Cyprinidae;Schizothoracinae;Schizothorax;Schizothorax	0	50	0
	Schizothorax sp.7	Vertebrata;Gnathostomata;Teleostomi;Euteleostomi;Actinopterygii;Actinopteri;Neopterygii;Teleostei;Osteoglossocephalai;Clupeocephala;Otomorpha;Ostariophysi;Otophysi;Cypriniphysae;Cypriniformes;Cyprinoidei;Cyprinidae;Schizothoracinae;Schizothorax;Schizothorax	0	20	0
	Sinogastromyzon sp.1	Vertebrata;Gnathostomata;Teleostomi;Euteleostomi;Actinopterygii;Actinopteri;Neopterygii;Teleostei;Osteoglossocephalai;Clupeocephala;Otomorpha;Ostariophysi;Otophysi;Cypriniphysae;Cypriniformes;Cobitoidei;Balitoridae;Sinogastromyzon;Sinogastromyzon	0	0	100
	Triplophysa sp.1	Vertebrata;Gnathostomata;Teleostomi;Euteleostomi;Actinopterygii;Actinopteri;Neopterygii;Teleostei;Osteoglossocephalai;Clupeocephala;Otomorpha;Ostariophysi;Otophysi;Cypriniphysae;Cypriniformes;Cobitoidei;Nemacheilidae;Triplophysa	1568	0	0
Amphibian	Desmognathus sp.1	Vertebrata;Gnathostomata;Teleostomi;Euteleostomi;Sarcopterygii;Dipnotetrapodomorpha;Tetrapoda;Amphibia;Batrachia;Caudata;Salamandroidea;Plethodontidae;Plethodontinae;Desmognathus;Desmognathus	0	0	254
	Megophrys sp.1	Vertebrata;Gnathostomata;Teleostomi;Euteleostomi;Sarcopterygii;Dipnotetrapodomorpha;Tetrapoda;Amphibia;Batrachia;Anura;Pelobatoidea;Megophryidae;Megophrys;Megophrys	0	46	0
	Oreolalax sp.1	Vertebrata;Gnathostomata;Teleostomi;Euteleostomi;Sarcopterygii;Dipnotetrapodomorpha;Tetrapoda;Amphibia;Batrachia;Anura;Pelobatoidea;Megophryidae;Oreolalax;Oreolalax	7098	0	0
	Oreolalax sp.2	Vertebrata;Gnathostomata;Teleostomi;Euteleostomi;Sarcopterygii;Dipnotetrapodomorpha;Tetrapoda;Amphibia;Batrachia;Anura;Pelobatoidea;Megophryidae;Oreolalax;Oreolalax	47	0	0
	Oreolalax sp.3	Vertebrata;Gnathostomata;Teleostomi;Euteleostomi;Sarcopterygii;Dipnotetrapodomorpha;Tetrapoda;Amphibia;Batrachia;Anura;Pelobatoidea;Megophryidae;Oreolalax;Oreolalax	0	5529	0
Bird	Cinclus sp.1	Vertebrata;Gnathostomata;Teleostomi;Euteleostomi;Sarcopterygii;Dipnotetrapodomorpha;Tetrapoda;Amniota;Sauropsida;Sauria;Archelosauria;Archosauria;Dinosauria;Saurischia;Theropoda;Coelurosauria;Aves;Neognathae;Passeriformes;Cinclidae;Cinclus;Cinclus	138	0	0
	Phoenicurus sp.1	Vertebrata;Gnathostomata;Teleostomi;Euteleostomi;Sarcopterygii;Dipnotetrapodomorpha;Tetrapoda;Amniota;Sauropsida;Sauria;Archelosauria;Archosauria;Dinosauria;Saurischia;Theropoda;Coelurosauria;Aves;Neognathae;Passeriformes;Muscicapidae;Phoenicurus;Phoenicurus	0	89	0
	Tachymarptis sp.1	Vertebrata;Gnathostomata;Teleostomi;Euteleostomi;Sarcopterygii;Dipnotetrapodomorpha;Tetrapoda;Amniota;Sauropsida;Sauria;Archelosauria;Archosauria;Dinosauria;Saurischia;Theropoda;Coelurosauria;Aves;Neognathae;Caprimulgimorphae;Apodiformes;Apodidae;Apodinae;Tachymarptis;Tachymarptis	0	0	34
Mammal	Anourosorex sp.1	Vertebrata;Gnathostomata;Teleostomi;Euteleostomi;Sarcopterygii;Dipnotetrapodomorpha;Tetrapoda;Amniota;Mammalia;Theria;Eutheria;Boreoeutheria;Laurasiatheria;Eulipotyphla;Soricidae;Soricinae;Anourosorex;Anourosorex	219	0	0
	Apodemus sp.1	Vertebrata;Gnathostomata;Teleostomi;Euteleostomi;Sarcopterygii;Dipnotetrapodomorpha;Tetrapoda;Amniota;Mammalia;Theria;Eutheria;Boreoeutheria;Euarchontoglires;Glires;Rodentia;Myomorpha;Muroidea;Muridae;Murinae;Apodemus;Apodemus	0	173	0
	Apodemus sp.2	Vertebrata;Gnathostomata;Teleostomi;Euteleostomi;Sarcopterygii;Dipnotetrapodomorpha;Tetrapoda;Amniota;Mammalia;Theria;Eutheria;Boreoeutheria;Euarchontoglires;Glires;Rodentia;Myomorpha;Muroidea;Muridae;Murinae;Apodemus;Apodemus	0	139	0
	Blarinella sp.1	Vertebrata;Gnathostomata;Teleostomi;Euteleostomi;Sarcopterygii;Dipnotetrapodomorpha;Tetrapoda;Amniota;Mammalia;Theria;Eutheria;Boreoeutheria;Laurasiatheria;Eulipotyphla;Soricidae;Soricinae;Blarinella	42	0	0
	Blarinella sp.2	Vertebrata;Gnathostomata;Teleostomi;Euteleostomi;Sarcopterygii;Dipnotetrapodomorpha;Tetrapoda;Amniota;Mammalia;Theria;Eutheria;Boreoeutheria;Laurasiatheria;Eulipotyphla;Soricidae;Soricinae;Blarinella;Blarinella	0	34	0
	Capra sp.1	Vertebrata;Gnathostomata;Teleostomi;Euteleostomi;Sarcopterygii;Dipnotetrapodomorpha;Tetrapoda;Amniota;Mammalia;Theria;Eutheria;Boreoeutheria;Laurasiatheria;Artiodactyla;Ruminantia;Pecora;Bovidae;Caprinae;Capra;Capra	0	20	0
	Chimarrogale sp.1	Vertebrata;Gnathostomata;Teleostomi;Euteleostomi;Sarcopterygii;Dipnotetrapodomorpha;Tetrapoda;Amniota;Mammalia;Theria;Eutheria;Boreoeutheria;Laurasiatheria;Eulipotyphla;Soricidae;Soricinae;Chimarrogale;Chimarrogale	12	0	0
	Chimarrogale sp.2	Vertebrata;Gnathostomata;Teleostomi;Euteleostomi;Sarcopterygii;Dipnotetrapodomorpha;Tetrapoda;Amniota;Mammalia;Theria;Eutheria;Boreoeutheria;Laurasiatheria;Eulipotyphla;Soricidae;Soricinae;Chimarrogale;Chimarrogale	0	324	0
	Nectogale sp.1	Vertebrata;Gnathostomata;Teleostomi;Euteleostomi;Sarcopterygii;Dipnotetrapodomorpha;Tetrapoda;Amniota;Mammalia;Theria;Eutheria;Boreoeutheria;Laurasiatheria;Eulipotyphla;Soricidae;Soricinae;Nectogale;Nectogale	0	97	0
	Niviventer sp.1	Vertebrata;Gnathostomata;Teleostomi;Euteleostomi;Sarcopterygii;Dipnotetrapodomorpha;Tetrapoda;Amniota;Mammalia;Theria;Eutheria;Boreoeutheria;Euarchontoglires;Glires;Rodentia;Myomorpha;Muroidea;Muridae;Murinae;Niviventer;Niviventer	0	4190	0
	Scaptonyx sp.1	Vertebrata;Gnathostomata;Teleostomi;Euteleostomi;Sarcopterygii;Dipnotetrapodomorpha;Tetrapoda;Amniota;Mammalia;Theria;Eutheria;Boreoeutheria;Laurasiatheria;Eulipotyphla;Talpidae;Scaptonyx;Scaptonyx	60	0	0
	Sciurotamias sp.1	Vertebrata;Gnathostomata;Teleostomi;Euteleostomi;Sarcopterygii;Dipnotetrapodomorpha;Tetrapoda;Amniota;Mammalia;Theria;Eutheria;Boreoeutheria;Euarchontoglires;Glires;Rodentia;Sciuromorpha;Sciuridae;Xerinae;Marmotini;Sciurotamias;Sciurotamias	0	123	0
	Sorex sp.1	Vertebrata;Gnathostomata;Teleostomi;Euteleostomi;Sarcopterygii;Dipnotetrapodomorpha;Tetrapoda;Amniota;Mammalia;Theria;Eutheria;Boreoeutheria;Laurasiatheria;Eulipotyphla;Soricidae;Soricinae;Sorex;Sorex	0	24	0
	Uropsilus sp.1	Vertebrata;Gnathostomata;Teleostomi;Euteleostomi;Sarcopterygii;Dipnotetrapodomorpha;Tetrapoda;Amniota;Mammalia;Theria;Eutheria;Boreoeutheria;Laurasiatheria;Eulipotyphla;Talpidae;Uropsilus;Uropsilus	0	127	0
